# Supplementary material for: Uncovering perturbations in human hematopoiesis associated with healthy aging and myeloid malignancies at single cell resolution
Source: bioRxiv preprint, doi:10.1101/2021.07.30.454542, version 2 (2022-03-16)
Supplement: Supplemental Table 2 [file 454542_file05.xlsx]

## Sheet: Info
Supplemental Table S2: Marker genes per celltype and condition (p value adjusted < 0.01 and logFC > 0.1)

## Sheet: Young
Gene	avg_logFC	p_value	p_value_adjusted	pct_expression_CellType	pct_expression_Rest	CellType
CRHBP	1.27177	0	0	0.795	0.15	HSC
AVP	1.08873	0	0	0.302	0.046	HSC
HOPX	1.02501	0	0	0.876	0.362	HSC
CD52	0.911982	0	0	0.91	0.493	HSC
FOS	0.770269	0	0	0.728	0.618	HSC
CD164	0.7497	0	0	0.875	0.695	HSC
MLLT3	0.723614	0	0	0.577	0.254	HSC
HLA-E	0.697519	0	0	0.899	0.759	HSC
MDK	0.69458	0	0	0.576	0.26	HSC
BST2	0.667275	0	0	0.87	0.71	HSC
CD37	0.625164	0	0	0.902	0.761	HSC
EIF4A2	0.617	0	0	0.917	0.79	HSC
PRDX1	0.611922	0	0	0.976	0.894	HSC
HEMGN	0.608178	0	0	0.564	0.187	HSC
ZFAS1	0.572516	0	0	0.997	0.976	HSC
SPINK2	0.548442	0	0	0.983	0.692	HSC
BEX2	0.5437	0	0	0.603	0.353	HSC
ICAM3	0.541117	0	0	0.84	0.679	HSC
IDS	0.521913	0	0	0.543	0.335	HSC
C6orf48	0.514715	0	0	0.964	0.903	HSC
IFITM3	0.483127	0	0	0.586	0.372	HSC
SYPL1	0.476877	0	0	0.797	0.675	HSC
EIF3E	0.472789	0	0	0.997	0.975	HSC
PTPRC	0.452845	0	0	0.592	0.428	HSC
NPR3	0.439483	0	0	0.456	0.268	HSC
FXYD5	0.424051	0	0	0.94	0.902	HSC
EPB41L4A-AS1	0.421141	0	0	0.73	0.622	HSC
AIF1	0.41333	0	0	0.985	0.898	HSC
RPL34	0.38698	0	0	1	1	HSC
CLEC9A	0.348318	0	0	0.239	0.041	HSC
RPL35A	0.292768	0	0	1	1	HSC
RPS4X	0.283811	0	0	1	1	HSC
RPL11	0.268123	0	0	1	1	HSC
RPL5	0.254152	0	0	1	0.999	HSC
RPS9	0.237156	0	0	1	1	HSC
RPL30	0.233062	0	0	1	1	HSC
RPL32	0.224465	0	0	1	1	HSC
RPL3	0.222516	0	0	1	1	HSC
RPL13	0.212	0	0	1	1	HSC
FAM30A	0.643757	0	0	0.599	0.426	HSC
TSC22D1	0.568616	0	0	0.781	0.568	HSC
CIRBP	0.389928	0	0	0.951	0.912	HSC
NRIP1	0.472743	0	0	0.461	0.299	HSC
LST1	0.475094	0	2.82178e-305	0.725	0.558	HSC
SNHG8	0.40616	3.64201e-303	9.4798e-299	0.948	0.891	HSC
NACA	0.241549	2.08309e-297	5.42206e-293	1	0.999	HSC
RPS3A	0.155456	5.36476e-294	1.39639e-289	1	1	HSC
AC026369.3	0.29746	1.23538e-290	3.21556e-286	0.185	0.029	HSC
LAPTM4A	0.380958	1.05173e-287	2.73754e-283	0.767	0.696	HSC
RPL15	0.192973	1.42328e-287	3.70465e-283	1	1	HSC
TSC22D3	0.566213	5.88575e-287	1.532e-282	0.769	0.677	HSC
CLEC2B	0.389243	2.24384e-283	5.84048e-279	0.535	0.393	HSC
TPT1	0.357732	4.30579e-283	1.12075e-278	1	1	HSC
EEF2	0.362821	2.20789e-280	5.74693e-276	0.975	0.954	HSC
RPL10A	0.203104	2.25892e-278	5.87974e-274	1	1	HSC
RACK1	0.29007	2.15167e-277	5.60059e-273	0.648	0.624	HSC
TAOK3	0.362544	1.65522e-276	4.30836e-272	0.674	0.598	HSC
MT-ND2	0.316656	7.33068e-271	1.9081e-266	1	0.994	HSC
ANKRD28	0.452266	4.57513e-267	1.19086e-262	0.706	0.628	HSC
BNIP3L	0.312751	1.5718e-266	4.09124e-262	0.496	0.412	HSC
HLF	0.219747	1.95791e-266	5.09625e-262	0.135	0.012	HSC
COMMD6	0.350548	3.30477e-265	8.60197e-261	0.971	0.959	HSC
AJ009632.2	0.266517	3.40988e-265	8.87558e-261	0.18	0.03	HSC
MALAT1	0.38366	1.48778e-263	3.87254e-259	0.996	0.998	HSC
HSD17B11	0.387919	2.78778e-263	7.25632e-259	0.759	0.682	HSC
MAGED2	0.292268	5.70291e-259	1.48441e-254	0.472	0.407	HSC
RPS24	0.173049	6.37545e-258	1.65947e-253	1	1	HSC
RARRES3	0.358855	4.54964e-256	1.18422e-251	0.496	0.349	HSC
MYCT1	0.343974	5.87103e-255	1.52817e-250	0.266	0.106	HSC
RAB13	0.299034	1.00095e-254	2.60539e-250	0.51	0.446	HSC
IL18	0.30428	1.82518e-251	4.75077e-247	0.433	0.346	HSC
ALDH1A1	0.436023	6.53403e-248	1.70074e-243	0.537	0.303	HSC
SELL	0.444338	6.07456e-247	1.58115e-242	0.807	0.605	HSC
SRSF5	0.323226	1.25243e-242	3.25994e-238	0.965	0.944	HSC
RPL31	0.479977	2.19005e-241	5.70047e-237	0.999	0.997	HSC
PFDN5	0.268937	2.65362e-241	6.90712e-237	0.99	0.986	HSC
PCDH9	0.413079	4.66086e-238	1.21317e-233	0.311	0.103	HSC
H1F0	0.381578	6.99588e-237	1.82096e-232	0.357	0.205	HSC
HINT1	0.231326	1.89153e-235	4.92347e-231	0.999	0.994	HSC
TFPI	0.316715	1.46521e-232	3.8138e-228	0.319	0.184	HSC
RPL12	0.234392	6.20771e-230	1.6158e-225	1	0.998	HSC
CD34	0.354544	8.30893e-226	2.16273e-221	0.611	0.489	HSC
MSRB3	0.267245	2.30094e-224	5.98912e-220	0.391	0.318	HSC
SOCS2	0.41743	1.87043e-222	4.86854e-218	0.485	0.262	HSC
PCBD1	0.223277	1.58173e-221	4.11709e-217	0.418	0.395	HSC
EEF1A1	0.162016	4.09768e-219	1.06658e-214	1	1	HSC
RHOC	0.298235	1.64343e-217	4.27767e-213	0.3	0.144	HSC
FGFR1OP2	0.272599	2.32584e-216	6.05393e-212	0.511	0.451	HSC
CFH	0.221711	9.97602e-216	2.59666e-211	0.155	0.042	HSC
SKAP1	0.237837	2.98712e-214	7.77517e-210	0.186	0.053	HSC
EGFL7	0.347025	2.05915e-211	5.35977e-207	0.741	0.634	HSC
CASP4	0.270833	1.51318e-210	3.93867e-206	0.601	0.565	HSC
RPS6	0.185862	4.24891e-210	1.10595e-205	1	1	HSC
BEX4	0.273104	4.62874e-210	1.20481e-205	0.638	0.6	HSC
LINC01122	0.258449	6.92608e-209	1.80279e-204	0.214	0.064	HSC
RPS3	0.168329	9.93708e-209	2.58652e-204	1	1	HSC
ANGPT1	0.315532	7.00876e-208	1.82431e-203	0.315	0.151	HSC
RPS18	0.205183	1.79544e-206	4.67336e-202	1	1	HSC
RIC3	0.24834	1.74186e-205	4.53388e-201	0.17	0.048	HSC
GIMAP2	0.268445	3.97841e-205	1.03554e-200	0.288	0.177	HSC
AKR1C3	0.323961	2.09019e-202	5.44056e-198	0.595	0.483	HSC
LRBA	0.252751	1.24834e-199	3.24931e-195	0.348	0.262	HSC
RPL10	0.14289	3.7274e-198	9.70204e-194	1	1	HSC
TATDN1	0.181835	4.12731e-198	1.0743e-193	0.402	0.431	HSC
ABHD14B	0.220311	6.16418e-198	1.60447e-193	0.513	0.507	HSC
ADGRG6	0.219995	1.50441e-197	3.91582e-193	0.164	0.034	HSC
GUCY1A1	0.252437	5.0105e-192	1.30418e-187	0.256	0.166	HSC
MPG	0.209203	1.78029e-190	4.6339e-186	0.528	0.531	HSC
AREG	0.810195	2.76321e-190	7.19236e-186	0.67	0.511	HSC
GNAI1	0.280521	1.082e-189	2.81634e-185	0.309	0.171	HSC
PNISR	0.319561	3.88175e-188	1.01038e-183	0.908	0.858	HSC
ZFAND1	0.207804	1.07678e-187	2.80274e-183	0.415	0.403	HSC
LAPTM4B	0.255284	1.0125e-186	2.63543e-182	0.374	0.335	HSC
HLA-DPA1	0.341469	1.04722e-186	2.7258e-182	0.914	0.835	HSC
TM4SF1	0.236688	1.59953e-184	4.16342e-180	0.167	0.051	HSC
GABPB1-AS1	0.298344	3.29253e-183	8.57014e-179	0.68	0.637	HSC
HLA-DPB1	0.347851	3.96464e-183	1.03196e-178	0.919	0.831	HSC
KRT18	0.284296	4.28223e-182	1.11462e-177	0.245	0.137	HSC
CYTL1	0.359367	3.61617e-181	9.41252e-177	0.735	0.573	HSC
CCDC42	0.222736	6.42287e-181	1.67181e-176	0.144	0.049	HSC
UCHL1	0.198441	2.14798e-180	5.59098e-176	0.152	0.075	HSC
VAMP2	0.255016	2.56662e-180	6.68065e-176	0.631	0.598	HSC
HOXB-AS3	0.184677	1.74031e-176	4.52984e-172	0.131	0.028	HSC
KDELR1	0.18595	5.42182e-176	1.41125e-171	0.508	0.526	HSC
SNHG12	0.210105	8.59763e-176	2.23788e-171	0.219	0.153	HSC
TMEM173	0.242732	1.17724e-175	3.06423e-171	0.545	0.515	HSC
MSI2	0.301221	2.76069e-174	7.1858e-170	0.611	0.536	HSC
RGS10	0.248284	4.69008e-174	1.22078e-169	0.527	0.469	HSC
BEX5	0.211436	9.31459e-174	2.42449e-169	0.154	0.037	HSC
TCEAL4	0.208955	1.39496e-172	3.63093e-168	0.505	0.505	HSC
FAU	0.156712	1.56736e-172	4.07969e-168	1	0.999	HSC
MRPL16	0.227748	7.94237e-172	2.06732e-167	0.661	0.669	HSC
RPL29	0.189476	8.78337e-172	2.28622e-167	1	0.999	HSC
ACAP1	0.211523	1.12377e-171	2.92506e-167	0.463	0.447	HSC
C1orf21	0.198375	1.163e-171	3.02718e-167	0.295	0.251	HSC
RPL9	0.155057	7.24562e-171	1.88596e-166	1	1	HSC
CD74	0.243464	8.15508e-170	2.12269e-165	0.99	0.95	HSC
ST13	0.272685	8.52201e-170	2.2182e-165	0.867	0.842	HSC
RABGAP1	0.219783	3.68603e-169	9.59438e-165	0.245	0.164	HSC
RPS12	0.135675	5.16565e-169	1.34457e-164	1	1	HSC
KIAA0125	0.544525	2.2366e-168	5.82165e-164	0.309	0.217	HSC
PPCS	0.123169	4.21269e-168	1.09652e-163	0.376	0.434	HSC
EVI2B	0.318398	9.73389e-168	2.53363e-163	0.494	0.368	HSC
EIF3D	0.269877	1.75387e-167	4.56514e-163	0.888	0.867	HSC
BIN1	0.282968	1.31549e-166	3.4241e-162	0.346	0.213	HSC
GNB2L1	0.238634	1.82112e-166	4.7402e-162	0.351	0.375	HSC
ELMO1	0.190241	2.70469e-166	7.04004e-162	0.34	0.314	HSC
C11orf1	0.129414	4.02237e-166	1.04698e-161	0.357	0.393	HSC
BEX1	0.387433	1.19305e-165	3.10538e-161	0.248	0.093	HSC
CALN1	0.173269	2.75425e-165	7.16903e-161	0.155	0.07	HSC
LETMD1	0.207655	5.26563e-165	1.37059e-160	0.369	0.329	HSC
ICA1	0.160818	9.48005e-165	2.46756e-160	0.231	0.199	HSC
TIMM9	0.13754	1.70764e-164	4.44481e-160	0.444	0.505	HSC
LTA4H	0.182872	2.10804e-164	5.48701e-160	0.506	0.524	HSC
LIMS1	0.295813	6.46841e-163	1.68366e-158	0.623	0.53	HSC
IGBP1	0.217355	1.38495e-162	3.60489e-158	0.591	0.586	HSC
TUBA1A	0.336994	2.4227e-162	6.30604e-158	0.67	0.648	HSC
SERPINB6	0.231265	4.05805e-162	1.05627e-157	0.599	0.567	HSC
SERPING1	0.182542	1.00675e-161	2.62048e-157	0.276	0.238	HSC
TM2D3	0.146916	1.74882e-160	4.552e-156	0.254	0.257	HSC
ARL6IP5	0.225501	9.34983e-159	2.43367e-154	0.735	0.742	HSC
RBPMS	0.224619	1.03799e-158	2.70178e-154	0.188	0.066	HSC
TAF1D	0.23715	4.92981e-158	1.28318e-153	0.716	0.712	HSC
RP11-598F7.3	0.219316	5.83062e-158	1.51765e-153	0.116	0.02	HSC
CLU	0.303259	2.59808e-157	6.76255e-153	0.259	0.163	HSC
HTR1F	0.214114	4.23393e-157	1.10205e-152	0.222	0.122	HSC
PQBP1	0.136996	6.13935e-157	1.59801e-152	0.397	0.433	HSC
N4BP2L2	0.230746	6.39137e-157	1.66361e-152	0.691	0.685	HSC
DNAJC4	0.188776	3.46145e-155	9.0098e-151	0.374	0.354	HSC
RNF220	0.122589	6.0318e-155	1.57002e-150	0.286	0.316	HSC
RSL1D1	0.263001	8.66831e-155	2.25627e-150	0.846	0.824	HSC
RPL39	0.20079	1.80786e-154	4.70567e-150	1	1	HSC
LEPROT	0.266189	4.21102e-153	1.09609e-148	0.542	0.477	HSC
PPP1R15A	0.198474	1.62587e-152	4.23198e-148	0.409	0.415	HSC
CCDC115	0.117042	9.67905e-150	2.51936e-145	0.305	0.343	HSC
ZBTB20	0.297362	1.36669e-149	3.55736e-145	0.352	0.25	HSC
AKR1A1	0.205405	1.37531e-149	3.5798e-145	0.691	0.702	HSC
CRYL1	0.13345	3.40329e-149	8.85842e-145	0.211	0.199	HSC
CRYGD	0.227767	3.82123e-149	9.94629e-145	0.464	0.417	HSC
GBP4	0.263356	4.36093e-149	1.13511e-144	0.311	0.184	HSC
SNHG7	0.284453	9.43682e-149	2.45631e-144	0.407	0.377	HSC
ISCU	0.134393	1.71809e-148	4.472e-144	0.465	0.516	HSC
RPL7	0.216096	2.44113e-148	6.35402e-144	1	1	HSC
ARHGDIB	0.243994	3.54835e-148	9.236e-144	0.986	0.976	HSC
PRKG2	0.18978	4.10945e-148	1.06965e-143	0.151	0.049	HSC
ARHGAP15	0.146576	4.50978e-148	1.17385e-143	0.456	0.496	HSC
TSPAN32	0.179375	1.46733e-147	3.8193e-143	0.322	0.299	HSC
GIMAP7	0.222248	1.70081e-147	4.42703e-143	0.171	0.057	HSC
CLDN15	0.169361	3.7123e-147	9.66275e-143	0.166	0.091	HSC
MBOAT7	0.192879	5.47276e-147	1.4245e-142	0.302	0.242	HSC
GMPR2	0.119832	1.48084e-146	3.85447e-142	0.36	0.393	HSC
SAT2	0.217239	1.8481e-146	4.81041e-142	0.31	0.246	HSC
GSTM5	0.150116	3.19749e-146	8.32275e-142	0.215	0.186	HSC
TBXAS1	0.153492	3.87752e-146	1.00928e-141	0.316	0.309	HSC
UBXN1	0.193637	5.71844e-146	1.48845e-141	0.684	0.708	HSC
HLA-DRA	0.222819	5.85413e-146	1.52377e-141	0.984	0.94	HSC
PBXIP1	0.256221	1.47001e-145	3.82629e-141	0.332	0.22	HSC
AJ006998.2	0.199048	1.64441e-145	4.28023e-141	0.114	0.021	HSC
STOM	0.142763	2.49782e-145	6.50157e-141	0.267	0.26	HSC
SCAMP2	0.113388	1.11948e-143	2.9139e-139	0.329	0.368	HSC
BIRC3	0.189502	4.2738e-143	1.11243e-138	0.136	0.05	HSC
PABPC1	0.22989	2.40574e-142	6.26189e-138	0.978	0.973	HSC
RSRP1	0.221246	3.09691e-142	8.06095e-138	0.449	0.405	HSC
DNAJB6	0.178874	3.27486e-142	8.52413e-138	0.644	0.674	HSC
MPHOSPH8	0.100705	3.78089e-142	9.84127e-138	0.436	0.512	HSC
RPS27A	0.123861	6.76103e-142	1.75983e-137	1	1	HSC
PROM1	0.211148	4.35803e-141	1.13435e-136	0.284	0.2	HSC
CARD8	0.155112	6.39689e-141	1.66505e-136	0.297	0.29	HSC
MECOM	0.157958	1.11722e-140	2.90802e-136	0.125	0.045	HSC
MAP7	0.160219	3.49857e-140	9.10643e-136	0.367	0.364	HSC
CD59	0.160668	3.82211e-140	9.94857e-136	0.499	0.528	HSC
BIN2	0.213094	2.18833e-139	5.69601e-135	0.422	0.374	HSC
SYF2	0.200802	2.9989e-139	7.80584e-135	0.646	0.644	HSC
FIS1	0.140575	9.84428e-139	2.56237e-134	0.612	0.664	HSC
SPINT2	0.220727	1.85341e-138	4.82425e-134	0.714	0.7	HSC
EIF2S3	0.1891	3.24462e-138	8.44541e-134	0.614	0.627	HSC
HMGA2	0.15601	5.64577e-138	1.46954e-133	0.139	0.085	HSC
TAF7	0.187667	1.39668e-137	3.63542e-133	0.622	0.641	HSC
TESPA1	0.237027	4.1103e-137	1.06987e-132	0.356	0.265	HSC
RBCK1	0.109071	5.03821e-137	1.3114e-132	0.326	0.368	HSC
MLF2	0.11052	7.89321e-137	2.05452e-132	0.468	0.529	HSC
NKAIN2	0.154116	8.01576e-137	2.08642e-132	0.123	0.04	HSC
TMEM163	0.148832	1.93291e-136	5.03118e-132	0.123	0.049	HSC
CHST12	0.113134	3.70964e-136	9.65581e-132	0.447	0.506	HSC
SMIM10L1	0.10474	4.8971e-136	1.27466e-131	0.311	0.352	HSC
CRBN	0.173293	1.4621e-135	3.8057e-131	0.471	0.478	HSC
TSPYL1	0.169021	3.27918e-135	8.53539e-131	0.294	0.275	HSC
HSPA1A	0.165132	6.9903e-135	1.8195e-130	0.265	0.235	HSC
ATP1B1	0.213058	1.16371e-134	3.02902e-130	0.262	0.189	HSC
EIF2A	0.159049	1.4807e-134	3.85412e-130	0.555	0.585	HSC
TRIP6	0.114141	1.71697e-134	4.4691e-130	0.237	0.251	HSC
ANXA4	0.136652	4.57557e-134	1.19097e-129	0.291	0.289	HSC
ERICH1	0.146303	9.31015e-132	2.42334e-127	0.335	0.342	HSC
CMBL	0.112054	1.21003e-131	3.14959e-127	0.23	0.24	HSC
ZFAND6	0.108081	1.39864e-131	3.64051e-127	0.385	0.442	HSC
USE1	0.103594	1.5648e-131	4.07303e-127	0.334	0.381	HSC
SELENOP	0.166355	2.7914e-131	7.26573e-127	0.152	0.102	HSC
TFDP2	0.15705	2.91022e-131	7.57501e-127	0.493	0.523	HSC
CCPG1	0.172868	6.35996e-131	1.65543e-126	0.234	0.186	HSC
PHF20	0.111038	8.25331e-131	2.14825e-126	0.392	0.45	HSC
NEAT1	0.265719	8.64821e-131	2.25104e-126	0.63	0.608	HSC
CIR1	0.11844	1.10889e-130	2.88633e-126	0.38	0.43	HSC
WSB1	0.142904	1.40997e-129	3.67e-125	0.446	0.479	HSC
C9orf43	0.193205	6.39308e-129	1.66405e-124	0.252	0.191	HSC
CCNDBP1	0.130405	3.51191e-128	9.14115e-124	0.453	0.492	HSC
CAMLG	0.171214	1.30657e-127	3.40087e-123	0.591	0.611	HSC
GLIPR1	0.279232	1.68382e-127	4.38283e-123	0.478	0.364	HSC
RAB37	0.191377	2.01794e-126	5.2525e-122	0.325	0.279	HSC
GPAT3	0.142035	6.8105e-126	1.7727e-121	0.103	0.027	HSC
SDCCAG8	0.102709	8.90842e-126	2.31877e-121	0.3	0.34	HSC
PNRC2	0.12958	2.8959e-125	7.53775e-121	0.435	0.464	HSC
ARMCX1	0.137437	5.16127e-125	1.34343e-120	0.217	0.192	HSC
IQGAP2	0.185583	1.0487e-124	2.72967e-120	0.455	0.468	HSC
SEPT6	0.219279	1.17102e-124	3.04806e-120	0.788	0.777	HSC
LIPA	0.104143	1.45995e-124	3.80009e-120	0.228	0.238	HSC
IFI16	0.240441	2.19876e-124	5.72315e-120	0.623	0.582	HSC
MMRN1	0.1993	7.71029e-124	2.00691e-119	0.198	0.101	HSC
OCIAD2	0.19117	8.98348e-124	2.33831e-119	0.596	0.58	HSC
CAVIN2	0.245368	9.11515e-124	2.37258e-119	0.27	0.192	HSC
ELF1	0.116237	1.1694e-123	3.04383e-119	0.561	0.642	HSC
PIK3IP1	0.192067	4.81433e-123	1.25312e-118	0.155	0.044	HSC
IP6K2	0.14448	7.16373e-123	1.86465e-118	0.317	0.321	HSC
TMEM69	0.104258	1.10697e-122	2.88132e-118	0.213	0.225	HSC
IFITM2	0.273801	1.71491e-122	4.46373e-118	0.662	0.605	HSC
ACSM3	0.180729	3.32711e-122	8.66015e-118	0.242	0.201	HSC
CHMP1B	0.164332	4.33464e-122	1.12826e-117	0.326	0.32	HSC
NT5C3A	0.105045	4.8464e-122	1.26147e-117	0.354	0.394	HSC
INPP4B	0.153631	2.0389e-121	5.30706e-117	0.143	0.067	HSC
ADGRG1	0.140818	9.35971e-121	2.43624e-116	0.185	0.143	HSC
NOB1	0.103981	1.40182e-120	3.64878e-116	0.427	0.48	HSC
SDPR	0.272183	1.60178e-120	4.16928e-116	0.149	0.078	HSC
VPS37B	0.140919	5.56484e-120	1.44847e-115	0.223	0.204	HSC
TNFRSF14	0.176583	3.08531e-119	8.03075e-115	0.225	0.155	HSC
PLD3	0.110021	3.60168e-119	9.37481e-115	0.203	0.205	HSC
SSBP2	0.240252	5.84365e-119	1.52104e-114	0.528	0.45	HSC
SMDT1	0.167934	1.34184e-118	3.49267e-114	0.791	0.83	HSC
ING4	0.111857	2.62205e-118	6.82493e-114	0.27	0.292	HSC
SMIM26	0.183616	6.26044e-118	1.62953e-113	0.466	0.472	HSC
HIST3H2A	0.205363	1.06443e-117	2.7706e-113	0.278	0.217	HSC
BTF3	0.165161	4.45831e-117	1.16045e-112	1	0.997	HSC
SORL1	0.193796	5.01923e-117	1.30646e-112	0.337	0.285	HSC
TAGAP	0.126514	6.1847e-117	1.60982e-112	0.212	0.193	HSC
PNRC1	0.182322	9.90571e-117	2.57836e-112	0.385	0.422	HSC
MEIS1	0.185813	1.33186e-116	3.46669e-112	0.197	0.109	HSC
SNAP23	0.10812	1.38771e-116	3.61206e-112	0.285	0.305	HSC
ETFRF1	0.109627	2.64159e-116	6.8758e-112	0.201	0.195	HSC
STAT3	0.108277	3.54784e-116	9.23466e-112	0.284	0.305	HSC
GABARAPL2	0.152475	4.10934e-116	1.06962e-111	0.64	0.666	HSC
HOXA9	0.214273	5.34739e-116	1.39187e-111	0.283	0.209	HSC
GCC2	0.119222	1.07766e-115	2.80505e-111	0.314	0.345	HSC
CHURC1	0.117726	1.3577e-115	3.53396e-111	0.347	0.38	HSC
TCEAL1	0.114843	3.6051e-115	9.38372e-111	0.216	0.218	HSC
NR4A2	0.196129	3.82838e-115	9.96488e-111	0.167	0.098	HSC
YPEL5	0.208875	4.30424e-115	1.12035e-110	0.387	0.343	HSC
HLA-DQA1	0.260903	6.45836e-115	1.68105e-110	0.399	0.297	HSC
SNRPN	0.153425	8.89723e-115	2.31586e-110	0.379	0.386	HSC
FBXW9	0.100579	8.93237e-115	2.32501e-110	0.206	0.214	HSC
SCRN2	0.108429	4.27641e-114	1.11311e-109	0.226	0.232	HSC
NCOA7	0.143771	4.52224e-114	1.17709e-109	0.266	0.252	HSC
ZKSCAN1	0.132603	1.00307e-113	2.6109e-109	0.325	0.331	HSC
CD69	0.372679	1.2229e-113	3.1831e-109	0.331	0.218	HSC
SULT1C4	0.145323	9.73786e-113	2.53467e-108	0.114	0.036	HSC
FNIP1	0.125442	1.11674e-112	2.90676e-108	0.293	0.303	HSC
RPS15A	0.135504	2.39278e-112	6.22818e-108	1	1	HSC
GSTK1	0.107149	4.80879e-112	1.25168e-107	0.622	0.693	HSC
GNA15	0.127356	1.31187e-111	3.41468e-107	0.391	0.409	HSC
RPL26	0.178175	1.39315e-111	3.62624e-107	0.999	1	HSC
TMEM59	0.17202	1.57588e-111	4.10187e-107	0.808	0.841	HSC
PRKACB	0.155996	2.16076e-111	5.62423e-107	0.348	0.336	HSC
CARD19	0.172146	4.42841e-111	1.15267e-106	0.315	0.287	HSC
UBR5-AS1	0.157361	8.77842e-111	2.28493e-106	0.157	0.085	HSC
ROBO3	0.129141	9.52469e-111	2.47918e-106	0.151	0.116	HSC
AC020916.1	0.179294	1.61461e-110	4.20267e-106	0.172	0.132	HSC
TMEM91	0.173578	2.10959e-110	5.49105e-106	0.19	0.113	HSC
TNRC6B	0.125831	2.34987e-110	6.11649e-106	0.428	0.468	HSC
ADAM28	0.180788	6.6513e-109	1.73127e-104	0.215	0.135	HSC
ITM2B	0.156034	2.4094e-108	6.27144e-104	0.549	0.609	HSC
GBP2	0.167559	4.20351e-108	1.09413e-103	0.18	0.109	HSC
SPRY1	0.172385	4.7597e-108	1.2389e-103	0.197	0.156	HSC
HLA-DQB1	0.249377	6.14915e-108	1.60056e-103	0.394	0.315	HSC
MYADM	0.161685	1.4017e-107	3.64849e-103	0.41	0.434	HSC
TCTEX1D1	0.147388	2.57478e-107	6.70188e-103	0.163	0.106	HSC
OPTN	0.156036	7.46788e-107	1.94381e-102	0.16	0.086	HSC
CLIC2	0.129867	8.33797e-107	2.17029e-102	0.131	0.078	HSC
MAGEF1	0.106	1.71485e-106	4.46357e-102	0.213	0.219	HSC
RPL38	0.176362	2.3528e-106	6.1241e-102	0.998	0.996	HSC
FRMD4B	0.163523	5.20599e-106	1.35507e-101	0.23	0.188	HSC
CEP70	0.108314	7.75186e-106	2.01773e-101	0.171	0.154	HSC
EVI2A	0.189394	1.31411e-105	3.42049e-101	0.211	0.132	HSC
RSBN1	0.101829	1.98754e-105	5.17337e-101	0.246	0.263	HSC
C3orf80	0.105394	3.1207e-105	8.12287e-101	0.104	0.074	HSC
RHOH	0.185302	5.73472e-105	1.49269e-100	0.333	0.304	HSC
GCHFR	0.161405	2.30307e-104	5.99466e-100	0.258	0.212	HSC
FNBP1	0.136288	3.80867e-104	9.9136e-100	0.498	0.53	HSC
ADPRM	0.159677	8.79726e-104	2.28984e-99	0.206	0.161	HSC
IL27RA	0.106136	1.45952e-103	3.79899e-99	0.187	0.176	HSC
ZNF581	0.114909	1.90738e-103	4.96473e-99	0.269	0.276	HSC
CPNE3	0.101676	2.12783e-103	5.53853e-99	0.325	0.363	HSC
CRYZL1	0.101939	4.09175e-103	1.06504e-98	0.246	0.257	HSC
ANAPC16	0.109514	3.99776e-102	1.04058e-97	0.654	0.716	HSC
AP002387.2	0.111745	1.31933e-101	3.43409e-97	0.14	0.105	HSC
CELF2	0.120057	6.93171e-101	1.80425e-96	0.552	0.605	HSC
NAP1L3	0.121385	3.54633e-100	9.23074e-96	0.121	0.064	HSC
ATP2C1	0.105956	7.65276e-100	1.99194e-95	0.219	0.216	HSC
TXNIP	0.260273	9.13287e-100	2.3772e-95	0.59	0.523	HSC
EIF3G	0.134627	3.34842e-99	8.71562e-95	0.764	0.807	HSC
ARGLU1	0.12261	5.76866e-98	1.50152e-93	0.675	0.732	HSC
ANXA6	0.130736	7.41251e-97	1.9294e-92	0.317	0.304	HSC
RGS14	0.111864	8.16012e-97	2.124e-92	0.168	0.143	HSC
SWAP70	0.111703	1.77968e-94	4.63233e-90	0.192	0.179	HSC
PLEKHA5	0.112668	2.79837e-94	7.28388e-90	0.192	0.177	HSC
ABRAXAS1	0.105313	4.10559e-94	1.06864e-89	0.179	0.166	HSC
FHL1	0.136484	7.95956e-94	2.07179e-89	0.236	0.228	HSC
MAST4	0.109914	9.12474e-94	2.37508e-89	0.164	0.147	HSC
RABAC1	0.108863	1.5065e-93	3.92126e-89	0.588	0.637	HSC
ANXA5	0.13189	2.17247e-93	5.65471e-89	0.316	0.312	HSC
NPDC1	0.149695	4.67354e-93	1.21648e-88	0.177	0.131	HSC
CAVIN1	0.129791	6.76548e-93	1.76099e-88	0.143	0.093	HSC
GADD45A	0.177344	5.08277e-92	1.32299e-87	0.253	0.211	HSC
LPIN1	0.17307	9.47729e-92	2.46684e-87	0.234	0.166	HSC
STK4	0.119272	2.7273e-91	7.0989e-87	0.387	0.407	HSC
PRSS2	0.277039	3.16471e-91	8.23743e-87	0.187	0.067	HSC
BCL2A1	0.139212	9.23808e-91	2.40458e-86	0.117	0.051	HSC
NIFK-AS1	0.113773	1.08098e-90	2.81369e-86	0.163	0.147	HSC
STMN3	0.103668	2.34259e-90	6.09754e-86	0.237	0.24	HSC
RPL24	0.114043	6.15123e-90	1.6011e-85	1	1	HSC
C12orf76	0.104423	1.15969e-89	3.01857e-85	0.225	0.228	HSC
PRKCH	0.134863	1.54668e-89	4.02586e-85	0.139	0.08	HSC
IPO11	0.11039	2.34797e-89	6.11153e-85	0.144	0.117	HSC
DDAH2	0.185092	5.48369e-89	1.42735e-84	0.632	0.614	HSC
TNFSF10	0.134974	5.71478e-89	1.4875e-84	0.163	0.122	HSC
GPSM3	0.112991	9.39647e-89	2.44581e-84	0.502	0.534	HSC
TMEM98	0.133707	2.16551e-88	5.63661e-84	0.106	0.044	HSC
ZSCAN18	0.104478	2.19005e-88	5.70049e-84	0.198	0.192	HSC
DUSP1	0.190253	4.44848e-88	1.15789e-83	0.351	0.365	HSC
DNASE2	0.106015	4.90309e-88	1.27622e-83	0.132	0.101	HSC
RSL24D1	0.167132	4.99785e-88	1.30089e-83	0.84	0.864	HSC
HOXA7	0.110773	5.08773e-88	1.32428e-83	0.184	0.173	HSC
LUC7L3	0.131479	7.31739e-87	1.90464e-82	0.707	0.752	HSC
HHEX	0.142725	8.24283e-87	2.14553e-82	0.326	0.321	HSC
LAPTM5	0.154692	4.3589e-86	1.13458e-81	0.768	0.75	HSC
TTC14	0.103516	6.5638e-86	1.70849e-81	0.335	0.358	HSC
HLA-DRB5	0.192239	1.2296e-85	3.20051e-81	0.558	0.539	HSC
CTSS	0.115503	3.78204e-85	9.84427e-81	0.409	0.428	HSC
ERG	0.123463	3.84395e-85	1.00054e-80	0.249	0.232	HSC
KRT8	0.114786	8.08437e-84	2.10428e-79	0.104	0.059	HSC
RPL18	0.118119	3.29856e-83	8.58583e-79	1	1	HSC
FOSB	0.188624	5.12922e-83	1.33508e-78	0.289	0.274	HSC
CD44	0.160483	1.89505e-82	4.93263e-78	0.566	0.561	HSC
CD300A	0.135011	2.44478e-82	6.3635e-78	0.231	0.193	HSC
LIMD2	0.138639	2.68284e-82	6.98316e-78	0.642	0.663	HSC
GCSAML	0.13414	4.53271e-82	1.17982e-77	0.132	0.058	HSC
DAPK1	0.133979	6.44189e-82	1.67676e-77	0.199	0.149	HSC
CSF3R	0.216364	1.09175e-81	2.84173e-77	0.449	0.367	HSC
RNF125	0.145381	1.67071e-81	4.3487e-77	0.248	0.209	HSC
ZNRF1	0.101105	2.71552e-81	7.06822e-77	0.25	0.263	HSC
EID1	0.177893	4.30957e-81	1.12174e-76	0.897	0.899	HSC
UFC1	0.137538	1.83432e-80	4.77454e-76	0.817	0.843	HSC
ARRDC3	0.147503	2.76153e-80	7.188e-76	0.32	0.298	HSC
RAPGEF2	0.111591	3.42663e-80	8.91917e-76	0.123	0.086	HSC
ARHGAP22	0.102044	3.93432e-80	1.02406e-75	0.166	0.15	HSC
MTURN	0.118512	5.94478e-80	1.54737e-75	0.202	0.19	HSC
RALB	0.100992	7.64786e-80	1.99066e-75	0.184	0.171	HSC
EIF1	0.149059	1.08917e-79	2.83499e-75	0.998	0.995	HSC
AP001171.1	0.169847	2.07832e-79	5.40967e-75	0.124	0.065	HSC
C19orf38	0.119516	1.16015e-78	3.01974e-74	0.152	0.106	HSC
DUSP6	0.136739	1.58104e-78	4.11529e-74	0.254	0.247	HSC
GUCY1A3	0.1618	3.5834e-78	9.32724e-74	0.117	0.065	HSC
AL590226.1	0.108454	3.67589e-78	9.56798e-74	0.114	0.066	HSC
XAF1	0.107676	4.11543e-78	1.07121e-73	0.203	0.187	HSC
PDE6G	0.102277	5.40535e-78	1.40696e-73	0.106	0.073	HSC
RPS27	0.158825	5.59749e-78	1.45697e-73	1	1	HSC
EIF3H	0.168477	7.7348e-77	2.01329e-72	0.935	0.94	HSC
PTMS	0.180644	3.07936e-76	8.01528e-72	0.21	0.135	HSC
LINC02573	0.120626	6.65858e-76	1.73316e-71	0.119	0.07	HSC
NFATC2	0.100687	9.84388e-76	2.56226e-71	0.133	0.111	HSC
PADI4	0.118305	2.61528e-75	6.80731e-71	0.185	0.152	HSC
CTD-3252C9.4	0.220917	3.53199e-75	9.19341e-71	0.11	0.063	HSC
CD200	0.128142	3.93576e-74	1.02444e-69	0.17	0.122	HSC
CKB	0.134565	6.40162e-74	1.66628e-69	0.141	0.092	HSC
SPTBN1	0.141601	3.30595e-73	8.60505e-69	0.258	0.218	HSC
RIPOR2	0.103143	7.88834e-73	2.05326e-68	0.218	0.214	HSC
XXYLT1-AS2	0.132851	1.71998e-72	4.47693e-68	0.119	0.036	HSC
STK17B	0.1297	8.80649e-72	2.29224e-67	0.288	0.279	HSC
SARAF	0.119986	3.45188e-71	8.98489e-67	0.774	0.804	HSC
IFI6	0.118769	4.75097e-69	1.23663e-64	0.271	0.273	HSC
RAB33A	0.103781	2.28048e-67	5.93587e-63	0.127	0.083	HSC
PLXDC2	0.122261	2.69304e-67	7.00972e-63	0.152	0.114	HSC
JUNB	0.10089	3.56344e-67	9.27528e-63	0.198	0.23	HSC
RPL13A	0.112118	6.38021e-67	1.6607e-62	1	1	HSC
DST	0.104818	9.46987e-67	2.46491e-62	0.202	0.183	HSC
TOMM7	0.13138	1.85609e-65	4.83122e-61	0.928	0.953	HSC
ABLIM1	0.107388	2.21734e-65	5.77153e-61	0.149	0.113	HSC
MT-ND3	0.181905	1.03134e-64	2.68449e-60	0.995	0.994	HSC
SOD2	0.107549	1.39781e-64	3.63836e-60	0.294	0.302	HSC
HOXB2	0.10531	1.96484e-64	5.11427e-60	0.118	0.074	HSC
JUP	0.128386	2.82222e-63	7.34596e-59	0.229	0.184	HSC
ATF7IP2	0.107525	8.93807e-63	2.32649e-58	0.403	0.418	HSC
KLF10	0.109039	1.47671e-61	3.84374e-57	0.228	0.209	HSC
PDLIM2	0.111479	3.85632e-61	1.00376e-56	0.173	0.129	HSC
GMFG	0.145616	1.13513e-60	2.95463e-56	0.956	0.965	HSC
FTX	0.10699	3.31217e-60	8.62126e-56	0.206	0.193	HSC
FTL	0.116612	4.76567e-60	1.24046e-55	0.999	0.995	HSC
NOP53	0.18147	7.11574e-60	1.85216e-55	0.441	0.448	HSC
SCN9A	0.118273	9.09281e-60	2.36677e-55	0.112	0.055	HSC
RPS2	0.130991	1.16757e-59	3.03908e-55	1	1	HSC
GNG11	0.169325	2.32596e-59	6.05423e-55	0.18	0.091	HSC
HIST2H2BE	0.148406	4.82211e-59	1.25515e-54	0.114	0.049	HSC
EIF3L	0.16724	1.02932e-58	2.67922e-54	0.958	0.954	HSC
VAMP5	0.191909	1.47159e-58	3.8304e-54	0.562	0.488	HSC
IL16	0.12027	3.77373e-57	9.82264e-53	0.212	0.173	HSC
PPDPF	0.114987	2.50454e-56	6.51906e-52	0.801	0.833	HSC
SEPP1	0.122032	4.29265e-56	1.11733e-51	0.107	0.069	HSC
LINC00493	0.10699	8.22345e-56	2.14048e-51	0.242	0.268	HSC
UQCRB	0.142933	1.06845e-53	2.78106e-49	0.988	0.986	HSC
ZFP36L2	0.189277	3.67944e-52	9.57721e-48	0.759	0.786	HSC
RPL36	0.115094	4.40722e-52	1.14716e-47	0.998	0.997	HSC
HSPB1	0.147311	1.08857e-51	2.83343e-47	0.713	0.693	HSC
IGSF10	0.122419	6.15692e-51	1.60258e-46	0.17	0.132	HSC
IGHD	0.116873	1.64341e-50	4.27763e-46	0.152	0.106	HSC
YPEL3	0.128128	7.96556e-49	2.07336e-44	0.216	0.171	HSC
NBEAL1	0.131662	9.84159e-48	2.56167e-43	0.56	0.617	HSC
TNFAIP3	0.116091	2.04544e-46	5.32408e-42	0.106	0.058	HSC
IL1B	0.184754	8.30895e-46	2.16274e-41	0.474	0.413	HSC
FTH1	0.179038	1.03946e-45	2.7056e-41	0.992	0.973	HSC
MT-CYB	0.118187	1.13337e-45	2.95005e-41	1	0.996	HSC
ZFP36	0.118282	1.9897e-45	5.179e-41	0.253	0.236	HSC
PBX1	0.144857	2.00095e-45	5.20826e-41	0.209	0.146	HSC
NPM1	0.106267	7.1643e-44	1.86479e-39	0.997	0.992	HSC
KCNQ1OT1	0.15093	1.09991e-42	2.86294e-38	0.294	0.275	HSC
RPL21	0.126342	4.67969e-41	1.21808e-36	1	0.999	HSC
PDE4B	0.106025	1.19855e-39	3.11971e-35	0.172	0.142	HSC
JUN	0.118143	1.70372e-38	4.43462e-34	0.155	0.16	HSC
JAML	0.145324	3.09002e-38	8.04301e-34	0.221	0.137	HSC
DDIT4	0.193228	1.67284e-34	4.35424e-30	0.372	0.29	HSC
HLA-DRB1	0.113585	6.44791e-34	1.67833e-29	0.818	0.776	HSC
BTG2	0.115614	1.86838e-32	4.8632e-28	0.177	0.108	HSC
ARID5B	0.105454	1.32674e-29	3.45337e-25	0.162	0.112	HSC
GLTSCR2	0.162279	1.9104e-29	4.97258e-25	0.155	0.146	HSC
RPS26	0.117605	1.38119e-25	3.5951e-21	0.927	0.963	HSC
SPINK2	0.777307	0	0	0.994	0.615	LMPP
SMIM24	0.5943	0	0	0.941	0.521	LMPP
AC002454.1	0.461838	0	0	0.638	0.296	LMPP
CSF3R	0.443576	0	0	0.685	0.262	LMPP
ENO1	0.417048	0	0	0.998	0.958	LMPP
GYPC	0.412182	0	0	0.971	0.812	LMPP
PRDX1	0.400386	0	0	0.985	0.871	LMPP
SELL	0.37553	0	0	0.889	0.526	LMPP
MGST1	0.367759	0	0	0.866	0.578	LMPP
HOPX	0.344237	0	0	0.757	0.278	LMPP
IFITM3	0.340132	0	0	0.659	0.292	LMPP
ICAM3	0.329979	0	0	0.886	0.622	LMPP
CD52	0.317492	0	0	0.82	0.423	LMPP
TNFSF13B	0.315985	0	0	0.794	0.461	LMPP
GAPDH	0.315966	0	0	1	0.996	LMPP
PHGDH	0.306429	0	0	0.666	0.329	LMPP
CD34	0.305248	0	0	0.74	0.413	LMPP
CLDN10	0.300405	0	0	0.5	0.176	LMPP
EGFL7	0.291873	0	0	0.839	0.573	LMPP
PKM	0.285354	0	0	0.908	0.642	LMPP
NAP1L1	0.283427	0	0	0.998	0.969	LMPP
TUBA1B	0.273682	0	0	0.992	0.93	LMPP
SPARC	0.266278	0	0	0.454	0.159	LMPP
AREG	0.265256	0	0	0.732	0.449	LMPP
HSPB1	0.251042	0	0	0.865	0.633	LMPP
PRAM1	0.243284	0	0	0.496	0.207	LMPP
PPA1	0.239379	0	0	0.943	0.767	LMPP
CD99	0.239378	0	0	0.904	0.703	LMPP
AIF1	0.229271	0	0	0.994	0.873	LMPP
GLIPR1	0.225289	0	0	0.588	0.297	LMPP
IGLL1	0.225133	0	0	0.947	0.692	LMPP
LDHA	0.22269	0	0	0.973	0.867	LMPP
AKR1A1	0.219741	0	0	0.847	0.648	LMPP
TRBC2	0.217612	0	0	0.429	0.167	LMPP
GSTP1	0.211551	0	0	0.997	0.954	LMPP
NUCB2	0.209985	0	0	0.991	0.928	LMPP
MDK	0.209425	0	0	0.462	0.222	LMPP
CDCA7	0.209054	0	0	0.664	0.42	LMPP
HINT1	0.208279	0	0	1	0.993	LMPP
HSPD1	0.20012	0	0	0.971	0.86	LMPP
IFI6	0.19589	0	0	0.451	0.208	LMPP
PYGL	0.192252	0	0	0.459	0.23	LMPP
IFITM2	0.191403	0	0	0.786	0.545	LMPP
CRYGD	0.186684	0	0	0.609	0.354	LMPP
RPL5	0.166651	0	0	1	0.999	LMPP
NAALADL1	0.165956	0	0	0.396	0.178	LMPP
PROM1	0.160797	0	0	0.364	0.15	LMPP
PRSS57	0.156051	0	0	0.973	0.827	LMPP
ITM2C	0.154682	0	0	0.89	0.628	LMPP
RPL3	0.154352	0	0	1	1	LMPP
BST2	0.145957	0	0	0.873	0.67	LMPP
ITM2A	0.144521	0	0	0.727	0.501	LMPP
ANXA1	0.142308	0	0	0.908	0.71	LMPP
MZB1	0.134668	0	0	0.713	0.407	LMPP
EEF1A1	0.133646	0	0	1	1	LMPP
RPL15	0.132987	0	0	1	1	LMPP
RPS3	0.132185	0	0	1	1	LMPP
RPS4X	0.130836	0	0	1	1	LMPP
RARRES3	0.13022	0	0	0.52	0.304	LMPP
RPL14	0.128397	0	0	1	0.999	LMPP
RPLP0	0.126319	0	0	1	1	LMPP
RPL18A	0.124292	0	0	1	1	LMPP
CD48	0.122601	0	0	0.482	0.271	LMPP
SPNS3	0.121247	0	0	0.505	0.274	LMPP
VAMP5	0.11844	0	0	0.681	0.426	LMPP
RPS7	0.115669	0	0	1	1	LMPP
RPS5	0.115385	0	0	1	0.999	LMPP
BIN1	0.112173	0	0	0.363	0.174	LMPP
RPS3A	0.104053	0	0	1	1	LMPP
LGALS3BP	0.156593	0	0	0.314	0.131	LMPP
RPS6	0.119982	0	8.44232e-307	1	1	LMPP
BTF3	0.145669	0	5.50842e-305	1	0.996	LMPP
IMPDH2	0.181966	4.11224e-302	1.07037e-297	0.949	0.807	LMPP
LY6E	0.179183	8.79751e-302	2.28991e-297	0.746	0.527	LMPP
SERPINB1	0.114657	4.14498e-301	1.0789e-296	0.982	0.878	LMPP
ANXA6	0.105152	1.04172e-299	2.71149e-295	0.445	0.254	LMPP
TCEAL4	0.16302	4.36408e-299	1.13593e-294	0.668	0.446	LMPP
MAPKAPK3	0.191013	9.79914e-299	2.55062e-294	0.63	0.405	LMPP
NPDC1	0.16463	3.49551e-287	9.09845e-283	0.252	0.093	LMPP
CASP4	0.163039	9.04743e-287	2.35495e-282	0.726	0.511	LMPP
MSI2	0.115768	4.37268e-284	1.13817e-279	0.696	0.486	LMPP
CASP1	0.116907	2.43225e-283	6.33091e-279	0.307	0.141	LMPP
RPL10A	0.107264	6.02697e-282	1.56876e-277	1	1	LMPP
SERPINB6	0.13989	1.15151e-276	2.99726e-272	0.723	0.515	LMPP
TAOK3	0.184781	6.87018e-275	1.78824e-270	0.756	0.55	LMPP
MSRB3	0.144323	3.24027e-274	8.43409e-270	0.471	0.271	LMPP
RPL4	0.127874	9.44256e-271	2.4578e-266	1	0.996	LMPP
FABP5	0.174935	3.55222e-267	9.24608e-263	0.949	0.824	LMPP
CD33	0.140058	6.99743e-265	1.82136e-260	0.353	0.176	LMPP
PSMB8	0.114149	3.17839e-264	8.27303e-260	0.882	0.709	LMPP
NPM1	0.142711	3.07963e-260	8.01596e-256	1	0.989	LMPP
HLA-A	0.15391	1.86357e-256	4.85068e-252	0.994	0.97	LMPP
MGST3	0.114158	1.37596e-250	3.58147e-246	0.777	0.587	LMPP
FLT3	0.123446	3.82508e-250	9.95631e-246	0.423	0.247	LMPP
C1QTNF4	0.398189	9.87554e-250	2.5705e-245	0.366	0.192	LMPP
ISYNA1	0.175271	1.01914e-249	2.65273e-245	0.508	0.307	LMPP
CD59	0.161421	5.64352e-247	1.46895e-242	0.675	0.472	LMPP
CD69	0.104485	1.66026e-242	4.32148e-238	0.344	0.185	LMPP
RPSA	0.110013	7.07915e-238	1.84263e-233	1	0.998	LMPP
MBOAT7	0.10475	1.88851e-237	4.9156e-233	0.368	0.203	LMPP
KRT18	0.139079	1.48084e-232	3.85447e-228	0.253	0.108	LMPP
NME1	0.131973	3.79208e-232	9.87041e-228	0.889	0.732	LMPP
HSH2D	0.120709	2.41314e-230	6.28116e-226	0.542	0.355	LMPP
RPL7A	0.119013	4.91898e-228	1.28036e-223	1	1	LMPP
MIR181A1HG	0.116648	3.45831e-227	9.00163e-223	0.439	0.263	LMPP
LDHB	0.134644	1.47756e-226	3.84595e-222	0.999	0.98	LMPP
HMGN5	0.126427	1.97363e-225	5.13716e-221	0.51	0.326	LMPP
ETHE1	0.109087	2.35447e-225	6.12845e-221	0.614	0.428	LMPP
C11orf74	0.128382	1.81779e-224	4.73151e-220	0.51	0.324	LMPP
CCT3	0.123153	1.64769e-221	4.28876e-217	0.88	0.724	LMPP
RSL1D1	0.135301	3.08563e-220	8.03159e-216	0.926	0.79	LMPP
PSME1	0.149041	4.31966e-220	1.12437e-215	0.977	0.909	LMPP
WDR54	0.128295	4.62209e-220	1.20308e-215	0.5	0.316	LMPP
PEBP1	0.15484	9.11753e-220	2.3732e-215	0.976	0.899	LMPP
RPL29	0.105348	9.4588e-218	2.46203e-213	1	0.999	LMPP
MCM7	0.14297	4.02915e-215	1.04875e-210	0.764	0.584	LMPP
CDK4	0.132937	5.86029e-215	1.52538e-210	0.81	0.639	LMPP
CDK6	0.16147	1.47503e-214	3.83934e-210	0.863	0.704	LMPP
TALDO1	0.130615	3.62898e-214	9.44587e-210	0.981	0.909	LMPP
TUFM	0.151623	3.662e-213	9.53183e-209	0.923	0.793	LMPP
MT-ND5	0.173646	1.57463e-211	4.09861e-207	0.984	0.936	LMPP
BEX1	0.158614	2.88977e-211	7.52177e-207	0.193	0.074	LMPP
TNFRSF1A	0.133078	3.05016e-209	7.93926e-205	0.46	0.284	LMPP
SERPING1	0.116183	3.17618e-209	8.26727e-205	0.359	0.199	LMPP
PGK1	0.153154	4.18386e-206	1.08902e-201	0.935	0.821	LMPP
SYPL1	0.100089	4.89694e-205	1.27462e-200	0.808	0.641	LMPP
EEF1B2	0.104158	4.35629e-204	1.1339e-199	1	0.996	LMPP
HENMT1	0.138741	4.51522e-203	1.17527e-198	0.529	0.347	LMPP
GGH	0.150356	4.54809e-202	1.18382e-197	0.542	0.359	LMPP
CAT	0.183885	3.42833e-201	8.92361e-197	0.925	0.803	LMPP
VDAC1	0.111138	1.00884e-199	2.62592e-195	0.835	0.675	LMPP
FAM216A	0.130957	1.25655e-199	3.27068e-195	0.452	0.279	LMPP
ARRB2	0.10578	5.37605e-199	1.39933e-194	0.468	0.3	LMPP
ANKRD28	0.157909	1.84318e-196	4.7976e-192	0.761	0.589	LMPP
HNRNPA1	0.141652	2.17665e-196	5.66561e-192	1	0.99	LMPP
MT-CYB	0.140271	2.40249e-196	6.25343e-192	1	0.995	LMPP
EIF3L	0.134764	2.06281e-192	5.36929e-188	0.989	0.942	LMPP
PAICS	0.108846	1.12006e-190	2.91539e-186	0.741	0.575	LMPP
PRDX4	0.126731	3.4781e-190	9.05316e-186	0.71	0.537	LMPP
RAN	0.125	5.98154e-189	1.55693e-184	0.99	0.937	LMPP
TMEM230	0.10677	1.92577e-188	5.01259e-184	0.796	0.635	LMPP
HSP90AB1	0.112186	4.45585e-187	1.15981e-182	0.999	0.977	LMPP
TMED9	0.125252	4.96122e-187	1.29136e-182	0.838	0.685	LMPP
CLNS1A	0.129919	1.66206e-186	4.32617e-182	0.916	0.791	LMPP
TPI1	0.101202	8.46036e-183	2.20215e-178	0.974	0.888	LMPP
FAH	0.127983	5.44893e-182	1.4183e-177	0.446	0.28	LMPP
NPM3	0.13531	3.78889e-180	9.86211e-176	0.686	0.514	LMPP
MT-ND4	0.113387	2.65718e-179	6.91638e-175	1	0.999	LMPP
HPRT1	0.100156	5.5937e-179	1.45599e-174	0.748	0.588	LMPP
MATK	0.135204	1.85967e-177	4.84053e-173	0.489	0.321	LMPP
MCM3	0.111533	3.29606e-176	8.57931e-172	0.675	0.51	LMPP
FAM30A	0.278823	4.84361e-174	1.26074e-169	0.548	0.401	LMPP
GSTK1	0.118495	9.61278e-174	2.50211e-169	0.801	0.646	LMPP
ARHGDIB	0.101001	3.14839e-173	8.19493e-169	0.997	0.969	LMPP
FBL	0.104179	3.65127e-173	9.50389e-169	0.948	0.843	LMPP
PPT1	0.127063	9.74007e-171	2.53524e-166	0.589	0.42	LMPP
MEST	0.102257	1.28619e-169	3.34783e-165	0.552	0.391	LMPP
CNBP	0.106332	2.06017e-169	5.36243e-165	0.943	0.837	LMPP
MPG	0.113941	6.53648e-169	1.70138e-164	0.653	0.487	LMPP
SRP9	0.100489	2.23117e-168	5.80752e-164	0.923	0.806	LMPP
POLD2	0.12303	6.16553e-168	1.60482e-163	0.688	0.524	LMPP
LTA4H	0.103105	1.28732e-166	3.35078e-162	0.642	0.48	LMPP
BZW2	0.107849	7.33118e-163	1.90823e-158	0.769	0.616	LMPP
FKBP1A	0.126742	1.14079e-161	2.96935e-157	0.905	0.786	LMPP
DCTPP1	0.121185	5.49099e-160	1.42925e-155	0.707	0.548	LMPP
ABRACL	0.108798	2.36771e-158	6.16292e-154	0.894	0.771	LMPP
PIK3R1	0.151138	4.09415e-158	1.06567e-153	0.485	0.326	LMPP
TKT	0.117054	1.66676e-154	4.3384e-150	0.933	0.832	LMPP
EIF4A1	0.101649	2.6156e-154	6.80814e-150	0.763	0.615	LMPP
DPP7	0.110255	3.1767e-154	8.26862e-150	0.696	0.54	LMPP
HSBP1	0.102697	3.00306e-153	7.81667e-149	0.855	0.722	LMPP
FARSA	0.107002	5.13383e-153	1.33628e-148	0.616	0.459	LMPP
HNRNPDL	0.112812	3.51781e-152	9.15651e-148	0.968	0.896	LMPP
YWHAE	0.102879	3.86779e-151	1.00675e-146	0.907	0.79	LMPP
APLP2	0.121925	1.05507e-150	2.74623e-146	0.754	0.604	LMPP
TMEM106C	0.119459	4.10412e-148	1.06826e-143	0.477	0.325	LMPP
CEBPA	0.110428	5.95956e-147	1.55121e-142	0.28	0.158	LMPP
PRDX6	0.110735	1.09002e-146	2.83722e-142	0.951	0.866	LMPP
CENPH	0.108197	1.0514e-143	2.73668e-139	0.556	0.404	LMPP
PRIM1	0.106654	6.1734e-131	1.60687e-126	0.479	0.336	LMPP
ARMH1	0.17239	1.66658e-130	4.33793e-126	0.502	0.357	LMPP
UNG	0.120995	1.45019e-129	3.7747e-125	0.48	0.338	LMPP
DUT	0.124447	2.97388e-127	7.74071e-123	0.886	0.775	LMPP
RPL7	0.100256	4.61021e-127	1.19999e-122	1	1	LMPP
BEX3	0.171751	4.69262e-100	1.22144e-95	0.56	0.442	LMPP
KIAA0125	0.256596	9.70769e-88	2.52681e-83	0.293	0.2	LMPP
TK1	0.120301	2.32081e-87	6.04083e-83	0.397	0.283	LMPP
TUBB4B	0.104163	2.02619e-73	5.27396e-69	0.622	0.513	LMPP
NGFRAP1	0.162033	1.73276e-51	4.51019e-47	0.337	0.271	LMPP
RPS17	0.122539	3.89636e-51	1.01418e-46	0.919	0.86	LMPP
IGFBP7	0.125462	4.05792e-42	1.05624e-37	0.462	0.381	LMPP
ALDOA	0.102775	3.19989e-13	8.32899e-09	0.386	0.351	LMPP
LYZ	2.62125	0	0	0.957	0.344	GMP
LGALS1	1.5683	0	0	0.957	0.452	GMP
CSTA	1.49211	0	0	0.827	0.125	GMP
PRTN3	1.45238	0	0	0.734	0.31	GMP
MPO	1.44634	0	0	0.995	0.576	GMP
CFD	1.18065	0	0	0.656	0.204	GMP
S100A8	1.12628	0	0	0.182	0.013	GMP
AZU1	1.08363	0	0	0.754	0.242	GMP
SRGN	1.01564	0	0	0.998	0.893	GMP
MNDA	0.979183	0	0	0.538	0.063	GMP
CTSG	0.937162	0	0	0.828	0.302	GMP
S100A9	0.920713	0	0	0.179	0.014	GMP
ELANE	0.894229	0	0	0.651	0.254	GMP
GPX1	0.879675	0	0	0.472	0.344	GMP
ANXA2	0.865089	0	0	0.753	0.227	GMP
PLAC8	0.814055	0	0	0.992	0.857	GMP
HCST	0.757266	0	0	0.878	0.505	GMP
CYBA	0.756544	0	0	0.991	0.876	GMP
KCNE5	0.751538	0	0	0.583	0.111	GMP
TMSB4X	0.737182	0	0	1	0.997	GMP
MRPL33	0.718344	0	0	0.874	0.633	GMP
LY86	0.716615	0	0	0.544	0.074	GMP
RNASE2	0.706479	0	0	0.832	0.276	GMP
MS4A6A	0.702532	0	0	0.358	0.036	GMP
TYROBP	0.701423	0	0	0.655	0.224	GMP
CEBPD	0.659169	0	0	0.452	0.092	GMP
TSPO	0.650964	0	0	0.958	0.811	GMP
DBI	0.636849	0	0	0.923	0.76	GMP
C20orf27	0.630893	0	0	0.761	0.427	GMP
SAMHD1	0.603961	0	0	0.537	0.098	GMP
MS4A3	0.593595	0	0	0.626	0.178	GMP
FCER1G	0.579278	0	0	0.566	0.195	GMP
TNFSF13B	0.57498	0	0	0.838	0.52	GMP
RETN	0.54093	0	0	0.207	0.017	GMP
NKG7	0.520798	0	0	0.572	0.198	GMP
PYCARD	0.515401	0	0	0.884	0.73	GMP
TMSB10	0.514547	0	0	1	0.995	GMP
SERPINB8	0.511777	0	0	0.504	0.121	GMP
IGSF6	0.502358	0	0	0.342	0.027	GMP
MGST1	0.492452	0	0	0.89	0.631	GMP
FCGRT	0.480629	0	0	0.661	0.371	GMP
VAMP8	0.480335	0	0	0.989	0.947	GMP
LYST	0.46894	0	0	0.467	0.145	GMP
FTL	0.458819	0	0	1	0.994	GMP
FABP5	0.442889	0	0	0.957	0.847	GMP
GSTP1	0.425947	0	0	0.993	0.963	GMP
IRF8	0.416435	0	0	0.649	0.176	GMP
SERF2	0.413634	0	0	0.998	0.988	GMP
MYL6	0.375218	0	0	0.985	0.968	GMP
KIAA0930	0.37302	0	0	0.437	0.153	GMP
PLD4	0.357654	0	0	0.527	0.19	GMP
F13A1	0.31316	0	0	0.23	0.025	GMP
RPLP2	0.30625	0	0	1	1	GMP
CSF1R	0.250044	0	0	0.252	0.028	GMP
UBA52	0.232193	0	0	1	0.998	GMP
RPLP1	0.21199	0	0	1	1	GMP
PRSS57	0.419585	0	0	0.959	0.856	GMP
VIM	0.458536	0	0	0.966	0.838	GMP
ADRB2	0.267773	0	0	0.278	0.055	GMP
MGST3	0.399722	0	0	0.783	0.623	GMP
IFI27L2	0.446363	0	2.29418e-308	0.565	0.276	GMP
FAM107B	0.382548	0	3.07255e-308	0.455	0.162	GMP
HSP90B1	0.434116	0	4.69471e-304	0.929	0.807	GMP
SERPINB10	0.3263	7.28071e-305	1.89509e-300	0.266	0.051	GMP
GRN	0.432465	5.01553e-304	1.30549e-299	0.657	0.39	GMP
MCL1	0.490517	1.7318e-302	4.50771e-298	0.616	0.345	GMP
PSME2	0.392483	6.09217e-296	1.58573e-291	0.906	0.816	GMP
CXorf21	0.414284	3.04159e-292	7.91696e-288	0.543	0.242	GMP
AP2S1	0.378121	4.14165e-283	1.07803e-278	0.86	0.711	GMP
RAB32	0.475074	5.26743e-276	1.37106e-271	0.6	0.33	GMP
UQCR11	0.462836	4.10553e-274	1.06863e-269	0.9	0.798	GMP
SSR4	0.335321	6.12069e-268	1.59316e-263	0.949	0.885	GMP
COX4I1	0.259739	3.25673e-264	8.47695e-260	0.992	0.988	GMP
NDUFB2	0.379049	7.64547e-257	1.99004e-252	0.911	0.811	GMP
UQCRQ	0.41252	1.61958e-246	4.2156e-242	0.935	0.844	GMP
AC020656.1	0.308713	3.63965e-244	9.47365e-240	0.145	0.018	GMP
LAMTOR4	0.339186	7.79034e-233	2.02775e-228	0.852	0.753	GMP
RBM47	0.16654	1.97015e-230	5.1281e-226	0.171	0.024	GMP
MINOS1	0.404059	1.23271e-228	3.20863e-224	0.815	0.65	GMP
C14orf2	0.559157	8.83771e-228	2.30037e-223	0.471	0.345	GMP
COTL1	0.359049	2.02714e-226	5.27645e-222	0.462	0.235	GMP
ATP5E	0.574862	3.59321e-224	9.35277e-220	0.471	0.349	GMP
COX7B	0.34258	7.26257e-220	1.89038e-215	0.947	0.876	GMP
RPS19	0.18796	1.27883e-218	3.32867e-214	1	1	GMP
IL6R	0.258015	9.43386e-218	2.45554e-213	0.338	0.12	GMP
NAIP	0.242659	8.82991e-217	2.29834e-212	0.286	0.089	GMP
S100A4	0.399306	2.41047e-215	6.27422e-211	0.968	0.867	GMP
RNASE6	0.250073	5.26854e-213	1.37135e-208	0.417	0.169	GMP
RPS16	0.193758	1.27441e-208	3.31716e-204	0.999	0.998	GMP
ERP29	0.264725	1.00461e-205	2.61491e-201	0.918	0.887	GMP
FOS	0.376668	1.06002e-202	2.75912e-198	0.824	0.607	GMP
PPIB	0.311275	1.42065e-202	3.69781e-198	0.906	0.848	GMP
MTMR11	0.153922	9.1663e-201	2.3859e-196	0.126	0.013	GMP
RPL39	0.266869	2.62039e-197	6.82062e-193	1	1	GMP
EGR1	0.218231	1.40981e-194	3.6696e-190	0.221	0.054	GMP
COX7A2	0.322374	1.00029e-193	2.60366e-189	0.973	0.938	GMP
CD302	0.294601	1.03327e-191	2.6895e-187	0.438	0.221	GMP
HLA-DMB	0.287275	7.75479e-190	2.0185e-185	0.51	0.252	GMP
PHPT1	0.336966	8.00849e-190	2.08453e-185	0.776	0.624	GMP
RPL27A	0.218098	1.26995e-189	3.30556e-185	1	0.999	GMP
COX8A	0.317832	5.51633e-188	1.43585e-183	0.914	0.828	GMP
LAMTOR2	0.323198	4.77847e-187	1.24379e-182	0.73	0.589	GMP
GPR183	0.271102	6.16101e-187	1.60365e-182	0.27	0.082	GMP
ATP6V0B	0.3147	1.00539e-186	2.61692e-182	0.824	0.722	GMP
TLR2	0.153226	1.31814e-186	3.43097e-182	0.162	0.03	GMP
SPNS3	0.309281	4.50022e-185	1.17136e-180	0.561	0.312	GMP
POLR2L	0.364774	2.65014e-184	6.89805e-180	0.879	0.766	GMP
SCPEP1	0.26376	7.25095e-184	1.88735e-179	0.366	0.153	GMP
TPI1	0.280093	3.3899e-183	8.82357e-179	0.969	0.905	GMP
HLA-DRB1	0.363717	3.42327e-182	8.91042e-178	0.884	0.769	GMP
ARPC2	0.236943	2.09795e-181	5.46076e-177	0.952	0.943	GMP
SLIRP	0.3553	3.25743e-180	8.47876e-176	0.818	0.694	GMP
HNMT	0.160178	8.91871e-180	2.32145e-175	0.148	0.026	GMP
RPL35	0.183823	3.10839e-177	8.09084e-173	1	0.999	GMP
ODF3B	0.12914	4.69939e-177	1.22321e-172	0.112	0.012	GMP
SEC61B	0.251764	4.28415e-176	1.11512e-171	0.946	0.899	GMP
BIK	0.163512	7.24517e-176	1.88584e-171	0.183	0.04	GMP
NDUFB11	0.287407	2.04716e-175	5.32854e-171	0.949	0.896	GMP
UQCR10	0.294884	3.99727e-175	1.04045e-170	0.918	0.849	GMP
RPS20	0.211348	1.16886e-173	3.04244e-169	1	1	GMP
EMB	0.30636	1.35339e-173	3.52275e-169	0.567	0.35	GMP
STXBP2	0.312927	6.96228e-173	1.81221e-168	0.478	0.294	GMP
RNASE3	0.198701	3.56153e-172	9.2703e-168	0.297	0.107	GMP
RPS23	0.123466	1.70866e-170	4.44748e-166	1	1	GMP
RPL37A	0.194866	1.04504e-169	2.72013e-165	1	0.999	GMP
CLEC12A	0.270913	2.58259e-169	6.72223e-165	0.38	0.168	GMP
RPS14	0.166448	4.32057e-167	1.1246e-162	1	1	GMP
FLNA	0.288278	8.06761e-166	2.09992e-161	0.412	0.234	GMP
NLRP3	0.183201	9.53222e-165	2.48114e-160	0.207	0.056	GMP
ATP5I	0.46694	1.71302e-164	4.45883e-160	0.396	0.277	GMP
SUB1	0.248483	1.49173e-162	3.88282e-158	0.972	0.946	GMP
BLOC1S1	0.312217	1.39863e-161	3.64049e-157	0.729	0.586	GMP
CCR2	0.120148	6.80329e-161	1.77083e-156	0.116	0.015	GMP
CCL23	0.160679	8.88415e-161	2.31246e-156	0.146	0.03	GMP
COX5B	0.257965	2.75365e-160	7.16748e-156	0.947	0.906	GMP
CST3	0.400657	1.82921e-159	4.76125e-155	0.648	0.434	GMP
KLF4	0.187707	4.30941e-157	1.1217e-152	0.191	0.05	GMP
PKM	0.285391	1.25385e-156	3.26364e-152	0.858	0.697	GMP
MEF2D	0.211905	1.93015e-156	5.02399e-152	0.292	0.11	GMP
HLA-DRA	0.204234	3.4925e-154	9.09062e-150	0.987	0.94	GMP
HRH2	0.153525	3.95334e-154	1.02901e-149	0.169	0.04	GMP
FOSL2	0.235785	1.02678e-152	2.67261e-148	0.289	0.117	GMP
TMEM258	0.29275	1.81444e-152	4.72282e-148	0.936	0.876	GMP
LCP1	0.305555	2.40884e-151	6.26997e-147	0.727	0.588	GMP
AREG	0.4974	4.71108e-150	1.22625e-145	0.724	0.504	GMP
ATOX1	0.295154	4.79939e-150	1.24923e-145	0.701	0.548	GMP
RP11-1143G9.4	0.25846	3.96369e-149	1.03171e-144	0.116	0.022	GMP
S100A6	0.224747	6.44215e-149	1.67683e-144	0.894	0.701	GMP
SDF2L1	0.354883	9.51707e-148	2.4772e-143	0.57	0.37	GMP
KBTBD11	0.201799	3.68511e-146	9.59198e-142	0.241	0.083	GMP
CITED4	0.202964	4.91628e-146	1.27966e-141	0.215	0.076	GMP
RPS13	0.125295	2.35744e-145	6.13618e-141	1	1	GMP
HLA-DMA	0.285808	1.25975e-144	3.279e-140	0.801	0.673	GMP
IL17RA	0.203823	1.3108e-143	3.41188e-139	0.277	0.108	GMP
TIFAB	0.122197	3.48882e-143	9.08104e-139	0.161	0.038	GMP
S100A11	0.313018	1.17785e-142	3.06583e-138	0.491	0.291	GMP
HLA-B	0.207762	8.67209e-141	2.25726e-136	0.992	0.99	GMP
HLX	0.165766	1.12287e-140	2.92273e-136	0.228	0.074	GMP
RPL27	0.154279	2.72929e-140	7.10406e-136	1	0.999	GMP
PFN1	0.248007	5.34985e-139	1.39251e-134	0.98	0.959	GMP
OAZ1	0.206287	8.85925e-138	2.30597e-133	0.982	0.978	GMP
CD63	0.280821	3.78127e-137	9.84227e-133	0.906	0.802	GMP
CD74	0.176677	1.21828e-135	3.17106e-131	0.983	0.95	GMP
NUP214	0.263521	7.70019e-135	2.00428e-130	0.389	0.219	GMP
DDT	0.259624	6.14231e-134	1.59878e-129	0.855	0.792	GMP
NDUFA1	0.292441	4.3163e-133	1.12349e-128	0.88	0.817	GMP
COX6C	0.234122	9.21039e-133	2.39737e-128	0.974	0.952	GMP
NDUFS5	0.284381	1.69141e-131	4.40258e-127	0.938	0.883	GMP
B3GNT7	0.123205	4.05212e-130	1.05473e-125	0.116	0.02	GMP
GSTO1	0.241495	2.72606e-127	7.09566e-123	0.878	0.818	GMP
CD33	0.225088	2.0552e-126	5.34947e-122	0.393	0.206	GMP
USMG5	0.426623	3.29596e-126	8.57905e-122	0.442	0.318	GMP
EIF3K	0.18949	2.15065e-125	5.59794e-121	0.97	0.962	GMP
ITGB2	0.255631	4.79979e-125	1.24934e-120	0.536	0.359	GMP
RASGRP2	0.278388	4.12345e-123	1.07329e-118	0.639	0.469	GMP
AIF1	0.209127	5.42164e-122	1.4112e-117	0.979	0.898	GMP
SEC61G	0.254722	6.89318e-122	1.79423e-117	0.925	0.852	GMP
CH17-373J23.1	0.42856	1.26848e-121	3.30173e-117	0.267	0.143	GMP
CLEC11A	0.403571	6.69306e-121	1.74214e-116	0.389	0.319	GMP
ATP5L	0.437892	4.50357e-120	1.17223e-115	0.477	0.359	GMP
RPS15	0.139988	3.68569e-119	9.59348e-115	1	1	GMP
RAB31	0.156427	5.38312e-119	1.40117e-114	0.157	0.042	GMP
HIGD2A	0.243983	2.68652e-118	6.99275e-114	0.84	0.773	GMP
NDUFB1	0.304587	3.66299e-118	9.53438e-114	0.736	0.646	GMP
PARVG	0.247801	1.03877e-117	2.70381e-113	0.572	0.391	GMP
NPC2	0.261759	5.14097e-117	1.33814e-112	0.799	0.696	GMP
RPL28	0.125879	1.10816e-116	2.88444e-112	1	1	GMP
H2AFZ	0.259624	8.24421e-116	2.14589e-111	0.979	0.939	GMP
ZFP36	0.21408	9.47873e-116	2.46722e-111	0.412	0.22	GMP
UBL5	0.24741	1.14646e-115	2.98411e-111	0.929	0.889	GMP
CD44	0.264878	3.39595e-115	8.83931e-111	0.673	0.55	GMP
CD93	0.11441	1.06449e-114	2.77077e-110	0.11	0.023	GMP
NDUFC2	0.256968	2.04759e-114	5.32967e-110	0.872	0.801	GMP
HSPB1	0.288703	4.26519e-113	1.11019e-108	0.808	0.683	GMP
DUSP1	0.29662	4.88701e-113	1.27204e-108	0.526	0.347	GMP
CORO1A	0.221578	1.77874e-112	4.62989e-108	0.847	0.706	GMP
PSMA7	0.219389	2.33664e-112	6.08204e-108	0.941	0.903	GMP
TMEM205	0.258826	1.71179e-110	4.45561e-106	0.575	0.427	GMP
PSMB3	0.25074	2.27167e-110	5.91293e-106	0.876	0.816	GMP
HGF	0.171095	5.67491e-110	1.47712e-105	0.236	0.093	GMP
RPL23	0.123077	6.35226e-110	1.65343e-105	0.999	0.998	GMP
TCEB2	0.387735	9.30643e-110	2.42237e-105	0.424	0.308	GMP
SHFM1	0.388114	2.62493e-109	6.83244e-105	0.436	0.319	GMP
TIMM8B	0.265433	3.24043e-109	8.43451e-105	0.754	0.659	GMP
FUOM	0.19699	3.55683e-109	9.25808e-105	0.305	0.153	GMP
RPL13	0.106074	7.17721e-109	1.86816e-104	1	1	GMP
RP11-84C10.2	0.14205	6.88804e-107	1.79289e-102	0.106	0.022	GMP
FGL2	0.129052	1.7457e-106	4.54389e-102	0.127	0.031	GMP
MIF4GD	0.230821	1.1677e-105	3.0394e-101	0.481	0.326	GMP
PLPPR3	0.165965	1.37762e-105	3.58582e-101	0.152	0.045	GMP
TMED10	0.238956	4.87115e-105	1.26791e-100	0.701	0.582	GMP
CALR	0.253717	9.47518e-105	2.4663e-100	0.889	0.856	GMP
C16orf74	0.14225	3.32533e-104	8.65551e-100	0.196	0.072	GMP
RPL36	0.178657	4.81325e-104	1.25284e-99	1	0.997	GMP
MS4A7	0.132973	3.3848e-103	8.8103e-99	0.173	0.056	GMP
LRRC8C	0.122777	7.28599e-103	1.89647e-98	0.181	0.061	GMP
CST7	0.245015	1.62397e-102	4.22704e-98	0.368	0.193	GMP
RPS27A	0.106277	3.147e-102	8.19132e-98	1	1	GMP
RNH1	0.246172	3.31362e-102	8.62501e-98	0.57	0.435	GMP
MYDGF	0.246634	2.33318e-101	6.07304e-97	0.724	0.608	GMP
FBP1	0.119818	3.85969e-101	1.00464e-96	0.131	0.034	GMP
MYEOV2	0.328452	6.46333e-101	1.68234e-96	0.356	0.249	GMP
CD48	0.233534	1.96456e-100	5.11355e-96	0.497	0.31	GMP
NAGA	0.164184	4.82844e-100	1.25679e-95	0.23	0.1	GMP
ARPC1B	0.268742	1.45879e-99	3.79709e-95	0.785	0.665	GMP
FAU	0.108702	2.24399e-99	5.84088e-95	0.999	0.999	GMP
RNASET2	0.281364	4.6036e-99	1.19827e-94	0.604	0.467	GMP
RPL12	0.139533	1.88024e-98	4.89406e-94	1	0.998	GMP
RPS28	0.183588	1.41322e-97	3.67846e-93	1	0.999	GMP
RPL21	0.201498	1.5946e-96	4.15059e-92	1	0.999	GMP
ATP5J2	0.36205	2.78605e-96	7.2518e-92	0.416	0.307	GMP
TIMP2	0.16766	7.33475e-96	1.90916e-91	0.273	0.13	GMP
AK4	0.132867	7.62882e-95	1.98571e-90	0.182	0.07	GMP
FCGR1A	0.112103	8.81906e-95	2.29551e-90	0.112	0.029	GMP
NDUFA11	0.240926	2.92121e-94	7.60361e-90	0.841	0.783	GMP
NDUFA13	0.294131	1.61691e-93	4.20866e-89	0.672	0.585	GMP
DCXR	0.242868	3.9374e-93	1.02487e-88	0.616	0.484	GMP
MRPL20	0.220868	2.35913e-92	6.14058e-88	0.782	0.709	GMP
RPS6KA4	0.136841	6.59571e-92	1.7168e-87	0.236	0.102	GMP
NRG4	0.100164	7.55759e-92	1.96716e-87	0.116	0.031	GMP
SMIM4	0.188781	1.02815e-91	2.67617e-87	0.286	0.184	GMP
POLE4	0.243664	2.22959e-91	5.80339e-87	0.546	0.412	GMP
OTULINL	0.104431	2.6733e-91	6.95834e-87	0.153	0.05	GMP
FAM105A	0.141038	2.74243e-91	7.13827e-87	0.105	0.026	GMP
ATP5G1	0.364474	2.20532e-90	5.74022e-86	0.405	0.279	GMP
POMP	0.232801	4.05323e-89	1.05502e-84	0.904	0.844	GMP
SF3B5	0.204927	3.57487e-88	9.30503e-84	0.88	0.832	GMP
C1QTNF4	0.480644	1.9353e-86	5.03739e-82	0.345	0.227	GMP
SNRPF	0.188761	2.16402e-86	5.63272e-82	0.93	0.894	GMP
POU2F2	0.135678	9.29705e-86	2.41993e-81	0.278	0.137	GMP
ROGDI	0.177154	1.36158e-84	3.54406e-80	0.286	0.159	GMP
NAA38	0.233742	1.41496e-84	3.68299e-80	0.853	0.762	GMP
HNRNPU	0.232613	1.92976e-84	5.02298e-80	0.811	0.717	GMP
NREP	0.214456	7.73205e-84	2.01258e-79	0.636	0.535	GMP
HEXB	0.197098	2.57664e-83	6.70673e-79	0.374	0.227	GMP
BCL2	0.174736	3.35488e-83	8.73242e-79	0.337	0.188	GMP
RAB11FIP1	0.191545	3.89892e-83	1.01485e-78	0.326	0.178	GMP
LINC00926	0.111781	9.3987e-83	2.44639e-78	0.12	0.037	GMP
FLT3	0.173883	9.51023e-83	2.47542e-78	0.448	0.278	GMP
P4HB	0.232148	1.55184e-82	4.03929e-78	0.716	0.608	GMP
APAF1	0.128829	5.03094e-82	1.3095e-77	0.192	0.079	GMP
EPHA1-AS1	0.118623	3.46949e-81	9.03075e-77	0.153	0.055	GMP
FKBP2	0.222985	1.02982e-80	2.68051e-76	0.714	0.584	GMP
NDUFS7	0.208693	1.31303e-80	3.41768e-76	0.7	0.603	GMP
ZYX	0.17237	2.60209e-80	6.77299e-76	0.338	0.194	GMP
CNPY3	0.207803	1.34647e-79	3.50473e-75	0.696	0.58	GMP
ROMO1	0.228992	2.89429e-79	7.53355e-75	0.638	0.536	GMP
TFEC	0.173981	3.09567e-79	8.05772e-75	0.327	0.187	GMP
NDUFA2	0.213692	3.30869e-79	8.6122e-75	0.805	0.723	GMP
ANAPC11	0.223976	3.36625e-79	8.76202e-75	0.768	0.676	GMP
RBKS	0.103611	9.08393e-79	2.36446e-74	0.139	0.05	GMP
COLGALT1	0.151225	1.11939e-78	2.91367e-74	0.263	0.144	GMP
MBNL1	0.213898	1.92012e-78	4.99788e-74	0.599	0.49	GMP
FUT4	0.107521	2.44051e-78	6.35239e-74	0.136	0.047	GMP
CEBPA	0.176956	5.84705e-78	1.52193e-73	0.324	0.177	GMP
NDUFA3	0.230637	9.63628e-78	2.50823e-73	0.635	0.556	GMP
SYNGR1	0.204189	1.66533e-77	4.33468e-73	0.711	0.563	GMP
RUNX1	0.204331	3.12498e-77	8.13401e-73	0.503	0.368	GMP
RPL38	0.152724	3.53984e-77	9.21385e-73	0.998	0.996	GMP
HLA-DRB5	0.224113	1.32492e-76	3.44865e-72	0.661	0.528	GMP
MARC1	0.104036	4.17175e-76	1.08586e-71	0.123	0.04	GMP
ST3GAL6	0.137158	5.49023e-76	1.42905e-71	0.202	0.091	GMP
PRKCD	0.101191	1.01646e-75	2.64574e-71	0.151	0.056	GMP
MFSD10	0.207393	1.17758e-75	3.06512e-71	0.518	0.406	GMP
SNRPE	0.192796	3.37887e-75	8.79486e-71	0.97	0.941	GMP
TRAPPC2L	0.20193	4.11543e-75	1.0712e-70	0.559	0.452	GMP
TRGC1	0.11792	9.25037e-75	2.40778e-70	0.135	0.051	GMP
NDUFS6	0.20115	2.50706e-74	6.52563e-70	0.821	0.757	GMP
NT5DC2	0.158092	5.66718e-74	1.47511e-69	0.281	0.16	GMP
FOSB	0.195916	9.59754e-74	2.49814e-69	0.417	0.261	GMP
ATP6V1F	0.187337	1.78075e-73	4.63512e-69	0.805	0.763	GMP
PRDX5	0.194235	3.12015e-73	8.12144e-69	0.819	0.758	GMP
QSOX1	0.148825	5.803e-73	1.51046e-68	0.234	0.121	GMP
PAK1	0.162601	7.18617e-73	1.87049e-68	0.306	0.176	GMP
AGTRAP	0.19077	1.9172e-72	4.99028e-68	0.353	0.247	GMP
ACTR2	0.207094	2.10706e-72	5.48447e-68	0.667	0.563	GMP
RPS21	0.123145	4.81345e-72	1.25289e-67	0.999	0.998	GMP
KLF6	0.188752	6.36515e-72	1.65678e-67	0.691	0.534	GMP
C1orf54	0.157142	8.57707e-72	2.23252e-67	0.199	0.095	GMP
TOP1MT	0.177328	1.56611e-71	4.07642e-67	0.389	0.26	GMP
ATP5G2	0.359688	4.44025e-71	1.15575e-66	0.471	0.356	GMP
PRAM1	0.171334	4.18863e-70	1.09026e-65	0.422	0.27	GMP
BRI3BP	0.172922	5.98704e-70	1.55837e-65	0.355	0.23	GMP
ATP6V0E1	0.207877	6.77789e-70	1.76422e-65	0.826	0.769	GMP
PARP8	0.105947	7.12957e-70	1.85576e-65	0.165	0.067	GMP
SSR3	0.198005	1.39662e-69	3.63526e-65	0.745	0.652	GMP
NDUFB8	0.192198	1.55535e-69	4.04842e-65	0.839	0.793	GMP
CNIH4	0.198133	1.74146e-69	4.53283e-65	0.372	0.258	GMP
NDUFA12	0.167243	1.07692e-68	2.80311e-64	0.798	0.759	GMP
PTRHD1	0.207864	6.07426e-68	1.58107e-63	0.747	0.673	GMP
HLA-DPB1	0.167371	7.88355e-68	2.05201e-63	0.905	0.832	GMP
ATP8B4	0.152138	1.60037e-67	4.1656e-63	0.288	0.161	GMP
CASP1	0.146948	3.35628e-67	8.73607e-63	0.306	0.173	GMP
APLP2	0.214157	6.82199e-67	1.7757e-62	0.729	0.635	GMP
PMAIP1	0.204033	1.13655e-66	2.95833e-62	0.424	0.28	GMP
MT1F	0.113906	1.44185e-66	3.75299e-62	0.124	0.045	GMP
VAMP5	0.272673	1.46671e-66	3.81771e-62	0.602	0.483	GMP
RPS29	0.230634	1.22908e-64	3.19917e-60	0.999	0.996	GMP
SNRPG	0.196392	1.28669e-64	3.34911e-60	0.887	0.836	GMP
MRPL41	0.201001	1.61989e-64	4.21642e-60	0.496	0.386	GMP
MT1X	0.134167	1.6662e-64	4.33695e-60	0.31	0.18	GMP
RPA3	0.214576	9.24899e-64	2.40742e-59	0.73	0.653	GMP
RPL36A	0.275979	1.20574e-63	3.13843e-59	0.971	0.938	GMP
TMA7	0.171956	1.55884e-63	4.05749e-59	0.957	0.94	GMP
C16orf13	0.215888	1.94165e-63	5.05392e-59	0.268	0.189	GMP
SPCS3	0.197311	2.17598e-63	5.66386e-59	0.572	0.452	GMP
REEP5	0.179834	3.32035e-63	8.64255e-59	0.42	0.292	GMP
EIF4EBP1	0.203457	7.47055e-63	1.94451e-58	0.67	0.583	GMP
ARRDC1	0.149688	2.77318e-62	7.2183e-58	0.32	0.201	GMP
RPS17	0.279363	5.57595e-62	1.45136e-57	0.942	0.869	GMP
KLF2	0.104965	5.6034e-62	1.45851e-57	0.126	0.046	GMP
PFDN2	0.17618	6.13555e-61	1.59702e-56	0.763	0.705	GMP
RBX1	0.176809	1.45293e-60	3.78183e-56	0.897	0.852	GMP
MRPS12	0.182576	1.58794e-60	4.13324e-56	0.584	0.506	GMP
H2AFJ	0.186718	2.40599e-60	6.26255e-56	0.473	0.359	GMP
TPP1	0.175193	3.58876e-60	9.34118e-56	0.373	0.251	GMP
MRPL57	0.155152	4.55434e-60	1.18545e-55	0.847	0.812	GMP
SPECC1	0.135062	1.07209e-59	2.79054e-55	0.293	0.173	GMP
ARHGAP17	0.118004	1.78317e-59	4.64142e-55	0.259	0.142	GMP
IRF5	0.131062	3.09691e-59	8.06093e-55	0.261	0.146	GMP
EMILIN2	0.118365	3.18963e-59	8.3023e-55	0.188	0.097	GMP
RPL26	0.120343	3.19159e-59	8.30739e-55	1	1	GMP
ARPC3	0.109569	7.97839e-59	2.0767e-54	0.952	0.965	GMP
TXNDC17	0.188386	1.17866e-58	3.06794e-54	0.682	0.603	GMP
NDRG1	0.111177	2.19257e-58	5.70704e-54	0.204	0.101	GMP
COMMD6	0.163853	2.97907e-58	7.75421e-54	0.971	0.959	GMP
CYSTM1	0.115128	6.44496e-58	1.67756e-53	0.165	0.076	GMP
RPL41	0.137344	7.0547e-58	1.83627e-53	1	1	GMP
AK2	0.176926	9.9293e-58	2.5845e-53	0.657	0.566	GMP
COMMD8	0.17987	1.86144e-57	4.84514e-53	0.494	0.385	GMP
RILPL2	0.177643	2.05873e-57	5.35867e-53	0.63	0.557	GMP
RNF181	0.190235	7.95155e-57	2.06971e-52	0.674	0.586	GMP
COX5A	0.178371	8.92367e-57	2.32274e-52	0.882	0.844	GMP
PTGER4	0.107372	1.47696e-56	3.84439e-52	0.215	0.11	GMP
SNRNP25	0.188125	1.36939e-55	3.56439e-51	0.581	0.475	GMP
GLIPR1	0.155264	5.39376e-55	1.40394e-50	0.505	0.361	GMP
PET100	0.202224	5.96119e-55	1.55164e-50	0.533	0.462	GMP
MRPL12	0.17927	9.30055e-55	2.42084e-50	0.639	0.555	GMP
PFDN5	0.129424	9.95427e-55	2.591e-50	0.985	0.986	GMP
STRA13	0.202679	2.39603e-54	6.23662e-50	0.224	0.153	GMP
LINC00936	0.148925	4.2468e-54	1.1054e-49	0.111	0.046	GMP
NUDT5	0.170118	8.43791e-54	2.1963e-49	0.635	0.556	GMP
ZFAND5	0.16973	1.10958e-53	2.88812e-49	0.377	0.28	GMP
GABARAP	0.112652	1.87237e-53	4.87359e-49	0.172	0.089	GMP
FNDC3B	0.125991	2.37096e-53	6.17136e-49	0.221	0.121	GMP
NDUFAB1	0.165412	2.76832e-53	7.20567e-49	0.834	0.792	GMP
AURKAIP1	0.166274	2.83347e-53	7.37523e-49	0.714	0.647	GMP
MYO1F	0.137462	2.85703e-53	7.43655e-49	0.323	0.203	GMP
TIMM13	0.173514	3.16674e-53	8.24271e-49	0.861	0.806	GMP
SLC2A4RG	0.130343	5.19822e-53	1.35304e-48	0.29	0.181	GMP
SYK	0.163377	7.39995e-53	1.92613e-48	0.453	0.329	GMP
AHNAK	0.147454	8.25996e-53	2.14998e-48	0.336	0.211	GMP
COX7C	0.138435	9.74908e-53	2.53759e-48	0.99	0.987	GMP
TBC1D1	0.133887	1.8581e-52	4.83645e-48	0.278	0.168	GMP
UQCRH	0.124877	1.94962e-52	5.07467e-48	0.982	0.977	GMP
RPL7	0.106183	2.06903e-52	5.38548e-48	1	1	GMP
TESC	0.138154	2.27993e-52	5.93444e-48	0.279	0.176	GMP
ATP5H	0.229702	3.39912e-52	8.84756e-48	0.336	0.256	GMP
CTSZ	0.128518	3.48743e-52	9.07744e-48	0.27	0.158	GMP
CFL1	0.126545	8.13304e-52	2.11695e-47	0.981	0.982	GMP
NDUFA4	0.13039	1.01242e-51	2.63523e-47	0.973	0.967	GMP
MANF	0.182128	1.90873e-51	4.96823e-47	0.635	0.525	GMP
TXN	0.132351	2.70786e-51	7.0483e-47	0.973	0.958	GMP
ATP5J	0.301721	3.16458e-51	8.2371e-47	0.438	0.332	GMP
PGLS	0.183454	5.12104e-51	1.33295e-46	0.578	0.516	GMP
NME1	0.173072	5.56582e-51	1.44873e-46	0.837	0.767	GMP
HIPK3	0.114858	1.21407e-50	3.16011e-46	0.186	0.099	GMP
CKLF	0.18347	1.55309e-50	4.04254e-46	0.65	0.574	GMP
FAM120A	0.164911	1.2723e-49	3.31167e-45	0.423	0.335	GMP
COX6A1	0.156338	1.66092e-49	4.32321e-45	0.919	0.891	GMP
UQCC2	0.179728	2.3058e-49	6.00177e-45	0.655	0.561	GMP
RNASEH2C	0.171999	4.10151e-49	1.06758e-44	0.752	0.691	GMP
EDEM3	0.123128	7.62986e-49	1.98598e-44	0.229	0.134	GMP
RAB27A	0.134701	1.48613e-48	3.86825e-44	0.309	0.2	GMP
TMEM107	0.167163	1.73167e-48	4.50736e-44	0.305	0.21	GMP
NUDT1	0.172066	2.28131e-48	5.93801e-44	0.71	0.627	GMP
FAM101B	0.114163	2.36603e-48	6.15855e-44	0.114	0.051	GMP
IQGAP1	0.139113	1.08668e-47	2.82852e-43	0.373	0.252	GMP
AKR1B1	0.170984	8.61152e-47	2.24149e-42	0.636	0.545	GMP
KCNAB2	0.147443	9.43195e-47	2.45504e-42	0.384	0.282	GMP
NAP1L1	0.102543	1.19141e-46	3.10111e-42	0.976	0.977	GMP
CIB1	0.159319	1.983e-46	5.16156e-42	0.62	0.541	GMP
ALCAM	0.115551	8.46496e-46	2.20334e-41	0.252	0.15	GMP
TMEM167A	0.171957	2.45658e-45	6.39422e-41	0.536	0.451	GMP
ATP5G3	0.286606	4.38525e-45	1.14144e-40	0.44	0.336	GMP
SPI1	0.138035	1.13446e-44	2.95289e-40	0.287	0.191	GMP
RP11-160E2.6	0.177438	2.62618e-44	6.83569e-40	0.168	0.098	GMP
CD84	0.141624	2.85853e-44	7.44048e-40	0.377	0.267	GMP
AHR	0.105411	3.17325e-44	8.25965e-40	0.163	0.084	GMP
MSRB1	0.131335	3.68296e-44	9.58638e-40	0.238	0.153	GMP
ATP5O	0.280872	5.82061e-44	1.51505e-39	0.446	0.338	GMP
IKBIP	0.141884	6.92659e-44	1.80292e-39	0.421	0.343	GMP
UVRAG	0.131875	1.02314e-43	2.66313e-39	0.257	0.162	GMP
ZNF593	0.148714	1.29847e-43	3.37978e-39	0.431	0.349	GMP
RAB3D	0.103495	2.23187e-43	5.80934e-39	0.175	0.098	GMP
RP11-620J15.3	0.262926	1.33307e-42	3.46984e-38	0.432	0.313	GMP
GTF2H5	0.163248	4.04896e-42	1.0539e-37	0.584	0.514	GMP
TOMM7	0.138949	4.8815e-42	1.27061e-37	0.959	0.95	GMP
SH3KBP1	0.137159	5.0962e-42	1.32649e-37	0.399	0.285	GMP
MFSD1	0.147406	5.828e-41	1.51697e-36	0.439	0.347	GMP
ATPIF1	0.250679	8.18072e-41	2.12936e-36	0.405	0.306	GMP
RPL22L1	0.160322	9.96329e-41	2.59334e-36	0.867	0.825	GMP
MT2A	0.170483	1.68131e-40	4.37627e-36	0.45	0.399	GMP
ACTN1	0.137962	2.05094e-40	5.33839e-36	0.398	0.294	GMP
OST4	0.13167	5.53631e-40	1.44105e-35	0.93	0.918	GMP
WDFY2	0.137696	1.08944e-39	2.8357e-35	0.404	0.302	GMP
CANX	0.141761	2.85958e-39	7.44319e-35	0.698	0.654	GMP
ZNF106	0.140195	3.39248e-39	8.8303e-35	0.393	0.302	GMP
NDUFB9	0.166862	6.10552e-39	1.58921e-34	0.81	0.742	GMP
ETFB	0.137695	1.01563e-38	2.64358e-34	0.71	0.672	GMP
CISD1	0.142274	1.06472e-38	2.77135e-34	0.382	0.313	GMP
SAP18	0.108321	1.56986e-38	4.08618e-34	0.89	0.897	GMP
COX14	0.155355	2.77195e-38	7.21511e-34	0.638	0.579	GMP
NDUFB7	0.143242	5.70962e-38	1.48616e-33	0.776	0.733	GMP
MKKS	0.15381	1.00716e-37	2.62153e-33	0.302	0.258	GMP
HCLS1	0.139234	1.10999e-37	2.88921e-33	0.547	0.47	GMP
C19orf70	0.14278	1.15779e-37	3.01361e-33	0.664	0.609	GMP
COPE	0.114845	1.8212e-37	4.74041e-33	0.83	0.814	GMP
ATL3	0.116116	3.41083e-37	8.87806e-33	0.25	0.171	GMP
CHML	0.100989	5.82654e-37	1.51659e-32	0.187	0.115	GMP
SLC38A10	0.108782	6.4431e-37	1.67707e-32	0.236	0.15	GMP
C20orf24	0.122964	1.33292e-36	3.46945e-32	0.114	0.066	GMP
COMMD9	0.134599	2.36116e-36	6.14586e-32	0.464	0.395	GMP
MTDH	0.150556	6.817e-36	1.7744e-31	0.732	0.681	GMP
PDIA4	0.134405	1.15815e-35	3.01456e-31	0.479	0.374	GMP
UQCRB	0.11071	1.32238e-35	3.44201e-31	0.99	0.986	GMP
SH3BGRL3	0.102336	1.80519e-35	4.69872e-31	0.907	0.91	GMP
LSM5	0.141725	2.17603e-35	5.66399e-31	0.854	0.819	GMP
HSPA5	0.147758	3.24032e-35	8.43422e-31	0.757	0.693	GMP
IRAK3	0.12662	1.9104e-34	4.97257e-30	0.316	0.226	GMP
MRPL51	0.129507	2.53862e-34	6.60776e-30	0.825	0.792	GMP
NBEAL1	0.233069	2.78411e-34	7.24675e-30	0.667	0.607	GMP
C19orf53	0.128128	2.9518e-34	7.68324e-30	0.761	0.731	GMP
DAP	0.101071	4.586e-34	1.19369e-29	0.235	0.153	GMP
RNPEP	0.102322	5.03127e-34	1.30959e-29	0.207	0.134	GMP
TRAPPC1	0.135982	7.25803e-34	1.88919e-29	0.724	0.677	GMP
CALM1	0.131473	8.73251e-34	2.27299e-29	0.782	0.72	GMP
TMEM256	0.148897	1.33493e-33	3.4747e-29	0.679	0.623	GMP
AIMP1	0.152128	1.68302e-33	4.38073e-29	0.622	0.562	GMP
RPL34	0.110371	2.62217e-33	6.82525e-29	1	1	GMP
IRF2BP2	0.135421	3.81765e-33	9.93696e-29	0.6	0.516	GMP
CPVL	0.131755	5.62266e-33	1.46352e-28	0.337	0.255	GMP
EFCAB2	0.11259	6.49045e-33	1.6894e-28	0.301	0.211	GMP
CMC1	0.114847	1.16206e-32	3.02472e-28	0.478	0.418	GMP
LINC00657	0.117433	1.30722e-32	3.40257e-28	0.125	0.074	GMP
CTSA	0.122888	5.12347e-32	1.33359e-27	0.394	0.315	GMP
ECHS1	0.114081	5.90379e-32	1.5367e-27	0.648	0.614	GMP
HSBP1	0.131259	5.978e-32	1.55601e-27	0.789	0.754	GMP
FAM162A	0.131284	6.0977e-32	1.58717e-27	0.56	0.493	GMP
TIMM10	0.149935	6.86611e-32	1.78718e-27	0.532	0.463	GMP
ETHE1	0.137292	7.3897e-32	1.92346e-27	0.551	0.47	GMP
MRPS21	0.124935	9.85848e-32	2.56606e-27	0.828	0.806	GMP
TNFAIP8L2	0.107403	1.63852e-31	4.2649e-27	0.252	0.174	GMP
NEDD8	0.107507	5.95526e-31	1.55009e-26	0.863	0.86	GMP
PARL	0.117723	9.42428e-31	2.45305e-26	0.521	0.467	GMP
MT-ND4L	0.138632	1.33134e-30	3.46535e-26	0.582	0.539	GMP
NPM3	0.145587	2.89984e-30	7.54799e-26	0.631	0.553	GMP
ZSCAN16-AS1	0.121272	5.15751e-30	1.34245e-25	0.313	0.26	GMP
RPL39L	0.121811	5.4981e-30	1.4311e-25	0.345	0.283	GMP
COX17	0.14335	1.71046e-29	4.45215e-25	0.57	0.503	GMP
RPS27	0.116202	2.0919e-29	5.44502e-25	1	1	GMP
DNAJC15	0.124467	2.71727e-29	7.07277e-25	0.625	0.574	GMP
DPM3	0.134161	2.74348e-29	7.14101e-25	0.533	0.468	GMP
UQCC3	0.125836	1.26561e-28	3.29425e-24	0.401	0.336	GMP
ZEB2	0.128451	1.30951e-28	3.40851e-24	0.627	0.561	GMP
ATP5EP2	0.104614	5.01099e-28	1.30431e-23	0.153	0.11	GMP
ZNF90	0.140112	8.52243e-28	2.2183e-23	0.338	0.286	GMP
ISOC2	0.131035	1.26963e-27	3.30472e-23	0.498	0.423	GMP
ANXA6	0.115822	2.11316e-27	5.50035e-23	0.389	0.296	GMP
KDELR2	0.12742	2.50338e-27	6.51604e-23	0.421	0.35	GMP
SHOC2	0.119514	3.64163e-27	9.47879e-23	0.327	0.252	GMP
MIF	0.161456	4.08121e-27	1.0623e-22	0.69	0.643	GMP
EIF4EBP2	0.104534	1.56116e-26	4.06354e-22	0.319	0.244	GMP
RPS10	0.11876	1.65325e-26	4.30325e-22	0.968	0.969	GMP
ARPC4	0.117589	2.16634e-26	5.63877e-22	0.639	0.586	GMP
TMEM261	0.152113	2.55983e-26	6.66298e-22	0.267	0.209	GMP
SNRPD1	0.110431	2.76173e-26	7.18849e-22	0.929	0.908	GMP
TMX4	0.111455	7.02247e-26	1.82788e-21	0.32	0.248	GMP
AC009501.4	0.156876	9.54491e-26	2.48445e-21	0.295	0.235	GMP
BST2	0.103342	1.33517e-25	3.47531e-21	0.775	0.718	GMP
MRPS33	0.102582	7.91597e-25	2.06045e-20	0.637	0.612	GMP
PPA1	0.109876	1.94e-24	5.04962e-20	0.845	0.81	GMP
RGS10	0.115973	2.822e-24	7.34538e-20	0.545	0.467	GMP
SAT1	0.159521	3.4969e-24	9.10208e-20	0.557	0.492	GMP
VMA21	0.115762	3.65169e-24	9.50499e-20	0.467	0.402	GMP
SYNCRIP	0.109801	4.15921e-24	1.0826e-19	0.635	0.596	GMP
NANS	0.112976	7.38307e-24	1.92174e-19	0.534	0.474	GMP
NDUFS8	0.117173	9.18287e-24	2.39021e-19	0.724	0.684	GMP
CTD-2090I13.1	0.196998	9.48764e-24	2.46954e-19	0.324	0.256	GMP
C19orf60	0.120071	1.55188e-23	4.0394e-19	0.147	0.105	GMP
ATP2B1	0.106743	9.30149e-23	2.42108e-18	0.317	0.271	GMP
MRPL55	0.113246	1.07065e-22	2.78679e-18	0.51	0.46	GMP
C4orf3	0.101	1.16616e-22	3.03541e-18	0.782	0.761	GMP
UXT	0.104844	2.94797e-22	7.67326e-18	0.929	0.914	GMP
DDX21	0.10985	3.15436e-22	8.21048e-18	0.603	0.57	GMP
POLR2I	0.110905	4.14626e-22	1.07923e-17	0.638	0.601	GMP
TMEM208	0.109371	1.19938e-21	3.12187e-17	0.477	0.42	GMP
RPN1	0.103303	2.36159e-21	6.14698e-17	0.489	0.42	GMP
MGST2	0.11159	2.59593e-21	6.75695e-17	0.717	0.667	GMP
ARF3	0.101076	9.36406e-21	2.43737e-16	0.403	0.346	GMP
TCEB1	0.142395	1.02451e-20	2.66671e-16	0.288	0.236	GMP
NIT2	0.101248	1.07852e-20	2.80727e-16	0.509	0.456	GMP
EAF2	0.112519	1.11939e-20	2.91365e-16	0.592	0.528	GMP
ATP5ME	0.107283	4.01339e-20	1.04465e-15	0.421	0.411	GMP
ALDOA	0.162136	4.37038e-20	1.13757e-15	0.436	0.353	GMP
CYCS	0.108431	5.86671e-20	1.52704e-15	0.749	0.708	GMP
RPS26	0.110248	6.28767e-20	1.63662e-15	0.971	0.958	GMP
CHCHD5	0.100974	8.42699e-20	2.19346e-15	0.452	0.407	GMP
PPIH	0.1072	1.3949e-19	3.63079e-15	0.548	0.497	GMP
UQCRHL	0.100378	1.68077e-19	4.37488e-15	0.231	0.192	GMP
SIVA1	0.103946	1.91598e-19	4.98709e-15	0.762	0.706	GMP
MRPL27	0.101913	3.54906e-19	9.23786e-15	0.491	0.453	GMP
FAM45A	0.107635	2.80601e-18	7.30377e-14	0.416	0.354	GMP
MRPS34	0.113962	3.09599e-18	8.05856e-14	0.503	0.452	GMP
DNPH1	0.112069	1.00938e-17	2.62732e-13	0.673	0.616	GMP
RANBP1	0.115582	1.27302e-17	3.31355e-13	0.764	0.717	GMP
HSD17B10	0.105784	9.87586e-17	2.57059e-12	0.608	0.574	GMP
CENPW	0.110426	6.55821e-16	1.70704e-11	0.508	0.444	GMP
C19orf43	0.131619	2.43407e-15	6.33564e-11	0.32	0.269	GMP
C11orf31	0.125696	6.94482e-15	1.80767e-10	0.318	0.263	GMP
PTTG1	0.110635	1.689e-14	4.39629e-10	0.526	0.464	GMP
HN1	0.104387	1.26096e-12	3.28215e-08	0.229	0.182	GMP
AC090498.1	0.13472	2.73361e-12	7.11532e-08	0.231	0.187	GMP
NGFRAP1	0.104519	4.31744e-11	1.12379e-06	0.342	0.283	GMP
LINC00493	0.100707	9.64073e-10	2.50939e-05	0.306	0.262	GMP
ELANE	2.83753	0	0	0.968	0.223	GMP_Granulocytes
PRTN3	2.59927	0	0	0.973	0.287	GMP_Granulocytes
AZU1	2.48966	0	0	0.984	0.221	GMP_Granulocytes
CTSG	1.98486	0	0	0.96	0.29	GMP_Granulocytes
MPO	1.97981	0	0	1	0.577	GMP_Granulocytes
CST7	1.36622	0	0	0.862	0.145	GMP_Granulocytes
SRGN	1.30455	0	0	1	0.893	GMP_Granulocytes
CALR	1.2271	0	0	0.98	0.847	GMP_Granulocytes
PRSS57	1.01081	0	0	0.997	0.853	GMP_Granulocytes
CFD	0.99093	0	0	0.72	0.199	GMP_Granulocytes
RNASE2	0.972996	0	0	0.883	0.272	GMP_Granulocytes
RNASE3	0.799578	0	0	0.572	0.08	GMP_Granulocytes
MGST1	0.762569	0	0	0.936	0.627	GMP_Granulocytes
P4HB	0.761231	0	0	0.848	0.595	GMP_Granulocytes
SDF2L1	0.709451	0	0	0.714	0.356	GMP_Granulocytes
IGLL1	0.679419	0	0	0.979	0.738	GMP_Granulocytes
HSP90B1	0.666559	0	0	0.955	0.805	GMP_Granulocytes
RAB32	0.664068	0	0	0.697	0.321	GMP_Granulocytes
PPIB	0.658215	0	0	0.948	0.844	GMP_Granulocytes
VAMP5	0.647354	0	0	0.766	0.467	GMP_Granulocytes
MS4A3	0.645543	0	0	0.749	0.167	GMP_Granulocytes
SSR4	0.640551	0	0	0.966	0.883	GMP_Granulocytes
FKBP2	0.55991	0	0	0.828	0.573	GMP_Granulocytes
HSPA5	0.542665	0	0	0.853	0.683	GMP_Granulocytes
FKBP11	0.540209	0	0	0.588	0.301	GMP_Granulocytes
CSTA	0.537887	0	0	0.651	0.144	GMP_Granulocytes
TMEM258	0.515303	0	0	0.966	0.873	GMP_Granulocytes
SEC61G	0.510773	0	0	0.955	0.85	GMP_Granulocytes
NUCB2	0.492029	0	0	0.986	0.941	GMP_Granulocytes
HSPB1	0.484336	0	0	0.865	0.678	GMP_Granulocytes
SERPINB1	0.479908	0	0	0.973	0.899	GMP_Granulocytes
MANF	0.463118	0	0	0.758	0.513	GMP_Granulocytes
APLP2	0.451753	0	0	0.805	0.628	GMP_Granulocytes
CPA3	0.449976	0	0	0.627	0.271	GMP_Granulocytes
PDIA6	0.447163	0	0	0.873	0.769	GMP_Granulocytes
PHPT1	0.442604	0	0	0.806	0.621	GMP_Granulocytes
MYDGF	0.435777	0	0	0.785	0.603	GMP_Granulocytes
MFSD10	0.414073	0	0	0.629	0.395	GMP_Granulocytes
VAMP8	0.388793	0	0	0.993	0.947	GMP_Granulocytes
SERF2	0.374158	0	0	0.999	0.988	GMP_Granulocytes
MNDA	0.344301	0	0	0.385	0.079	GMP_Granulocytes
SERPINB10	0.343759	0	0	0.309	0.048	GMP_Granulocytes
PLPPR3	0.3421	0	0	0.26	0.035	GMP_Granulocytes
RPL36	0.339773	0	0	1	0.997	GMP_Granulocytes
RPS19	0.338248	0	0	1	1	GMP_Granulocytes
KBTBD11	0.326808	0	0	0.331	0.074	GMP_Granulocytes
RPLP2	0.29257	0	0	1	1	GMP_Granulocytes
RPS14	0.291446	0	0	1	1	GMP_Granulocytes
IGFBP2	0.274928	0	0	0.256	0.041	GMP_Granulocytes
RPL35	0.261798	0	0	1	0.999	GMP_Granulocytes
UBA52	0.244267	0	0	1	0.998	GMP_Granulocytes
RPS15	0.239666	0	0	1	1	GMP_Granulocytes
RPLP1	0.23128	0	0	1	1	GMP_Granulocytes
RPL13	0.202753	0	0	1	1	GMP_Granulocytes
CEBPD	0.43557	0	0	0.374	0.101	GMP_Granulocytes
CEBPE	0.271294	0	0	0.219	0.026	GMP_Granulocytes
RASGRP2	0.427421	0	0	0.709	0.463	GMP_Granulocytes
SSR3	0.40949	0	0	0.814	0.646	GMP_Granulocytes
RPS16	0.230522	7.13752e-308	1.85783e-303	0.999	0.998	GMP_Granulocytes
SMIM24	0.414702	9.98137e-308	2.59805e-303	0.888	0.607	GMP_Granulocytes
CLEC11A	0.669428	3.69376e-299	9.61448e-295	0.467	0.312	GMP_Granulocytes
RPL41	0.303121	4.43434e-297	1.15421e-292	1	1	GMP_Granulocytes
RPL28	0.191739	2.71351e-288	7.063e-284	1	1	GMP_Granulocytes
AL355922.1	0.26725	6.48349e-282	1.68759e-277	0.215	0.038	GMP_Granulocytes
RPL37A	0.258789	6.95404e-275	1.81007e-270	1	0.999	GMP_Granulocytes
LYST	0.34346	3.65359e-273	9.50992e-269	0.416	0.15	GMP_Granulocytes
SEC61B	0.325702	6.69227e-270	1.74193e-265	0.964	0.897	GMP_Granulocytes
RNASEH2C	0.402569	7.21086e-262	1.87692e-257	0.833	0.683	GMP_Granulocytes
HGF	0.282851	5.04442e-257	1.31301e-252	0.31	0.086	GMP_Granulocytes
FTL	0.25343	4.89348e-256	1.27372e-251	1	0.994	GMP_Granulocytes
RPL9	0.175436	9.09216e-253	2.3666e-248	1	1	GMP_Granulocytes
CEBPA	0.371759	4.83492e-250	1.25848e-245	0.428	0.167	GMP_Granulocytes
TNFSF13B	0.412286	1.06114e-249	2.76203e-245	0.777	0.527	GMP_Granulocytes
NDUFB9	0.386523	8.2413e-246	2.14513e-241	0.868	0.737	GMP_Granulocytes
FAU	0.173257	1.17077e-243	3.04739e-239	1	0.999	GMP_Granulocytes
NDUFB11	0.335565	2.44554e-242	6.36551e-238	0.962	0.895	GMP_Granulocytes
RPS12	0.152846	5.84036e-238	1.52019e-233	1	1	GMP_Granulocytes
CLEC5A	0.141135	6.91919e-236	1.801e-231	0.116	0.007	GMP_Granulocytes
CYBA	0.323281	3.7854e-231	9.85301e-227	0.971	0.879	GMP_Granulocytes
VAT1	0.295334	4.4951e-230	1.17003e-225	0.37	0.144	GMP_Granulocytes
CAT	0.338585	3.79287e-225	9.87247e-221	0.895	0.829	GMP_Granulocytes
RPS28	0.264383	2.93277e-218	7.6337e-214	1	0.999	GMP_Granulocytes
GYPC	0.321608	2.17844e-216	5.67026e-212	0.928	0.847	GMP_Granulocytes
GSTP1	0.269931	3.78345e-213	9.84794e-209	0.993	0.963	GMP_Granulocytes
RPS24	0.144892	6.62133e-213	1.72347e-208	1	1	GMP_Granulocytes
RPL18A	0.170254	1.06907e-205	2.78269e-201	1	1	GMP_Granulocytes
RPS27A	0.151734	6.53021e-203	1.69975e-198	1	1	GMP_Granulocytes
PRDX5	0.312681	7.0849e-202	1.84413e-197	0.847	0.755	GMP_Granulocytes
RPS23	0.133234	1.76469e-200	4.5933e-196	1	1	GMP_Granulocytes
RPS8	0.144585	9.16723e-198	2.38614e-193	1	1	GMP_Granulocytes
COX4I1	0.221839	3.51502e-196	9.14925e-192	0.996	0.988	GMP_Granulocytes
CNIH4	0.318608	8.90748e-196	2.31853e-191	0.445	0.251	GMP_Granulocytes
GPI	0.288	1.9407e-192	5.05145e-188	0.514	0.344	GMP_Granulocytes
ATOX1	0.332902	3.34733e-188	8.71277e-184	0.707	0.548	GMP_Granulocytes
FNDC3B	0.250185	3.26066e-187	8.48717e-183	0.304	0.113	GMP_Granulocytes
UQCRQ	0.37859	2.69257e-185	7.0085e-181	0.931	0.844	GMP_Granulocytes
MYB	0.352752	9.81017e-185	2.55349e-180	0.635	0.411	GMP_Granulocytes
AC092069.1	0.269221	7.0749e-178	1.84152e-173	0.204	0.065	GMP_Granulocytes
RPL39	0.243374	1.70603e-177	4.44062e-173	1	1	GMP_Granulocytes
TRH	0.248167	2.47597e-177	6.44469e-173	0.297	0.109	GMP_Granulocytes
PLAC8	0.177867	2.41451e-176	6.28474e-172	0.969	0.859	GMP_Granulocytes
RPL23	0.157756	1.95208e-175	5.08106e-171	1	0.998	GMP_Granulocytes
C12orf57	0.302423	4.03998e-175	1.05157e-170	0.844	0.742	GMP_Granulocytes
SEC11C	0.305311	2.5696e-174	6.6884e-170	0.593	0.43	GMP_Granulocytes
RPS20	0.207885	3.04043e-174	7.91394e-170	1	1	GMP_Granulocytes
RPL37	0.14601	4.21516e-174	1.09716e-169	1	1	GMP_Granulocytes
FAM45A	0.315351	6.08358e-174	1.58349e-169	0.548	0.341	GMP_Granulocytes
CANX	0.318495	6.96205e-174	1.81215e-169	0.739	0.651	GMP_Granulocytes
RGCC	0.268849	6.68857e-171	1.74097e-166	0.223	0.07	GMP_Granulocytes
RPS13	0.135161	8.91839e-171	2.32137e-166	1	1	GMP_Granulocytes
COX6B1	0.262752	3.25862e-169	8.48185e-165	0.98	0.957	GMP_Granulocytes
AGTRAP	0.272021	6.88307e-168	1.7916e-163	0.426	0.24	GMP_Granulocytes
UQCR11	0.379006	1.99676e-166	5.19738e-162	0.889	0.8	GMP_Granulocytes
RPL38	0.229722	2.20545e-166	5.74056e-162	0.999	0.996	GMP_Granulocytes
PDIA3	0.311468	3.04537e-164	7.92679e-160	0.771	0.682	GMP_Granulocytes
SYNGR1	0.307297	5.11403e-164	1.33113e-159	0.744	0.56	GMP_Granulocytes
SF3B5	0.283061	1.38532e-162	3.60585e-158	0.896	0.831	GMP_Granulocytes
MARC1	0.15307	2.53697e-161	6.60348e-157	0.166	0.036	GMP_Granulocytes
RPN1	0.287915	6.27461e-160	1.63322e-155	0.576	0.412	GMP_Granulocytes
ATP5ME	0.36315	5.89194e-159	1.53361e-154	0.556	0.398	GMP_Granulocytes
TRGC1	0.158369	3.13228e-158	8.15301e-154	0.186	0.046	GMP_Granulocytes
SUCNR1	0.232155	4.10065e-158	1.06736e-153	0.291	0.109	GMP_Granulocytes
NAALADL1	0.274143	1.8749e-156	4.88017e-152	0.434	0.216	GMP_Granulocytes
SLC2A5	0.200969	2.02539e-152	5.27188e-148	0.304	0.116	GMP_Granulocytes
RPL27	0.161945	6.31899e-150	1.64477e-145	1	0.999	GMP_Granulocytes
ROMO1	0.310745	8.41577e-150	2.19054e-145	0.665	0.533	GMP_Granulocytes
ERLIN1	0.234141	3.64777e-146	9.49478e-142	0.363	0.192	GMP_Granulocytes
RPS18	0.157278	3.84021e-144	9.99569e-140	1	1	GMP_Granulocytes
FABP5	0.27037	1.33444e-143	3.47341e-139	0.943	0.849	GMP_Granulocytes
NPW	0.302545	3.01553e-143	7.84912e-139	0.312	0.162	GMP_Granulocytes
MARCKS	0.239524	6.56204e-143	1.70803e-138	0.193	0.059	GMP_Granulocytes
ENO1	0.216441	3.67038e-142	9.55363e-138	0.985	0.967	GMP_Granulocytes
CHID1	0.262663	2.3351e-141	6.07802e-137	0.557	0.42	GMP_Granulocytes
P2RY8	0.23055	2.50828e-140	6.52881e-136	0.343	0.165	GMP_Granulocytes
PFDN5	0.194644	1.3613e-139	3.54332e-135	0.993	0.985	GMP_Granulocytes
RNF181	0.285876	3.73912e-139	9.73256e-135	0.709	0.583	GMP_Granulocytes
DPM3	0.284017	1.12117e-137	2.91828e-133	0.599	0.462	GMP_Granulocytes
MINOS1	0.326418	8.46544e-137	2.20347e-132	0.785	0.654	GMP_Granulocytes
RPL27A	0.190902	1.35818e-136	3.5352e-132	1	1	GMP_Granulocytes
RPS26	0.402782	8.62624e-136	2.24532e-131	0.987	0.957	GMP_Granulocytes
ATP5MC1	0.34987	5.16685e-135	1.34488e-130	0.623	0.503	GMP_Granulocytes
PDIA4	0.268668	6.06827e-133	1.57951e-128	0.541	0.369	GMP_Granulocytes
RPL35A	0.153802	8.19141e-133	2.13214e-128	1	1	GMP_Granulocytes
CLDN10	0.253376	1.74711e-132	4.54755e-128	0.444	0.244	GMP_Granulocytes
FLNA	0.249151	3.16341e-132	8.23403e-128	0.401	0.235	GMP_Granulocytes
RPL8	0.141549	7.97899e-132	2.07685e-127	1	0.999	GMP_Granulocytes
NME1	0.273189	8.51909e-132	2.21743e-127	0.877	0.763	GMP_Granulocytes
NAA38	0.285962	8.52713e-132	2.21953e-127	0.88	0.759	GMP_Granulocytes
ATP5I	0.252553	3.62453e-131	9.43429e-127	0.272	0.29	GMP_Granulocytes
STAR	0.128441	3.27847e-130	8.53352e-126	0.16	0.04	GMP_Granulocytes
NDUFB2	0.266197	9.31061e-128	2.42346e-123	0.902	0.812	GMP_Granulocytes
GAPDH	0.181236	1.86779e-127	4.86168e-123	0.999	0.997	GMP_Granulocytes
LAMTOR4	0.256151	5.35824e-126	1.3947e-121	0.838	0.755	GMP_Granulocytes
MTDH	0.298538	2.33624e-125	6.081e-121	0.751	0.679	GMP_Granulocytes
C16orf74	0.156378	7.50808e-125	1.95428e-120	0.21	0.071	GMP_Granulocytes
TXN	0.208014	5.71308e-123	1.48706e-118	0.979	0.957	GMP_Granulocytes
COX7B	0.252654	3.43932e-122	8.9522e-118	0.935	0.878	GMP_Granulocytes
RPL7	0.185045	1.65564e-121	4.30947e-117	1	1	GMP_Granulocytes
B4GALT5	0.179019	3.791e-121	9.8676e-117	0.223	0.091	GMP_Granulocytes
NDUFS5	0.262466	1.28941e-120	3.35621e-116	0.943	0.883	GMP_Granulocytes
POLR2L	0.311224	9.18553e-120	2.3909e-115	0.862	0.768	GMP_Granulocytes
DNPH1	0.275449	6.66937e-119	1.73597e-114	0.754	0.608	GMP_Granulocytes
PRAM1	0.231856	5.42096e-117	1.41102e-112	0.461	0.266	GMP_Granulocytes
NDUFA11	0.278419	1.95102e-116	5.07831e-112	0.866	0.781	GMP_Granulocytes
SPCS3	0.250112	1.87384e-114	4.87743e-110	0.594	0.45	GMP_Granulocytes
CEACAM4	0.145196	3.30942e-114	8.61409e-110	0.188	0.062	GMP_Granulocytes
ARL2	0.244844	1.04737e-113	2.72619e-109	0.722	0.608	GMP_Granulocytes
C1QTNF4	0.430186	1.67691e-112	4.36483e-108	0.405	0.222	GMP_Granulocytes
FARSA	0.2331	4.21299e-112	1.0966e-107	0.615	0.49	GMP_Granulocytes
SLIRP	0.300923	1.24073e-110	3.22949e-106	0.797	0.697	GMP_Granulocytes
ELOB	0.317679	5.48529e-110	1.42777e-105	0.642	0.549	GMP_Granulocytes
COMT	0.224568	1.55296e-109	4.04221e-105	0.808	0.738	GMP_Granulocytes
DDOST	0.208871	7.39247e-109	1.92419e-104	0.736	0.675	GMP_Granulocytes
ATP5MC2	0.253762	1.13738e-108	2.96049e-104	0.678	0.616	GMP_Granulocytes
MIF	0.317802	2.87328e-108	7.47887e-104	0.749	0.637	GMP_Granulocytes
COX5B	0.21542	1.02905e-107	2.67853e-103	0.949	0.906	GMP_Granulocytes
CITED4	0.161179	1.12565e-107	2.92994e-103	0.208	0.077	GMP_Granulocytes
SND1	0.218429	1.35403e-107	3.5244e-103	0.52	0.413	GMP_Granulocytes
MT-ND4L	0.245976	2.44824e-107	6.37251e-103	0.629	0.534	GMP_Granulocytes
GFI1	0.117586	4.38193e-106	1.14057e-101	0.144	0.04	GMP_Granulocytes
MLC1	0.199947	1.37985e-105	3.59161e-101	0.348	0.208	GMP_Granulocytes
CSF3R	0.239352	1.05982e-104	2.75861e-100	0.55	0.357	GMP_Granulocytes
OSTC	0.190182	7.26995e-104	1.89229e-99	0.903	0.881	GMP_Granulocytes
HYOU1	0.167046	1.30352e-103	3.39294e-99	0.251	0.113	GMP_Granulocytes
CITED2	0.263461	1.27242e-102	3.31199e-98	0.42	0.255	GMP_Granulocytes
EIF4EBP1	0.24388	1.51836e-102	3.95215e-98	0.703	0.58	GMP_Granulocytes
SEC61A1	0.203627	7.34871e-102	1.91279e-97	0.363	0.231	GMP_Granulocytes
RPL22L1	0.256716	6.02636e-100	1.5686e-95	0.901	0.822	GMP_Granulocytes
CLEC12A	0.193971	1.61775e-99	4.21083e-95	0.338	0.173	GMP_Granulocytes
RPL21	0.206423	2.84586e-99	7.40749e-95	1	0.999	GMP_Granulocytes
RPL26	0.169846	5.08514e-98	1.32361e-93	1	1	GMP_Granulocytes
RAB44	0.102816	2.25984e-97	5.88214e-93	0.131	0.037	GMP_Granulocytes
TENT5A	0.227113	1.50358e-96	3.91367e-92	0.332	0.182	GMP_Granulocytes
RPL12	0.135589	1.84656e-96	4.80641e-92	1	0.998	GMP_Granulocytes
SSR1	0.222723	3.17198e-96	8.25634e-92	0.618	0.511	GMP_Granulocytes
C19orf70	0.223493	1.45085e-95	3.77641e-91	0.706	0.605	GMP_Granulocytes
RFLNB	0.229555	3.85457e-95	1.0033e-90	0.358	0.204	GMP_Granulocytes
NPM3	0.248883	1.93368e-94	5.03318e-90	0.655	0.55	GMP_Granulocytes
COX6C	0.194421	7.66296e-94	1.99459e-89	0.976	0.952	GMP_Granulocytes
CPVL	0.204142	8.78882e-94	2.28764e-89	0.401	0.249	GMP_Granulocytes
NDUFA13	0.298143	2.612e-93	6.79876e-89	0.67	0.585	GMP_Granulocytes
TOP1MT	0.197873	3.18996e-93	8.30314e-89	0.401	0.259	GMP_Granulocytes
ANPEP	0.121914	5.12803e-93	1.33478e-88	0.161	0.057	GMP_Granulocytes
ATP5MPL	0.315078	4.68999e-92	1.22076e-87	0.663	0.572	GMP_Granulocytes
MRPL12	0.223898	1.31911e-91	3.43352e-87	0.673	0.552	GMP_Granulocytes
PSMB3	0.2295	1.5693e-91	4.08472e-87	0.895	0.814	GMP_Granulocytes
RPS21	0.141984	1.73402e-91	4.51347e-87	1	0.998	GMP_Granulocytes
TIMM13	0.226109	3.94307e-91	1.02634e-86	0.879	0.804	GMP_Granulocytes
BEX3	0.304229	4.75504e-91	1.23769e-86	0.588	0.462	GMP_Granulocytes
ATP5MD	0.295596	6.09542e-90	1.58658e-85	0.609	0.514	GMP_Granulocytes
NDUFA1	0.253745	1.44393e-89	3.75841e-85	0.881	0.817	GMP_Granulocytes
SNRPD2	0.186376	1.80022e-89	4.68579e-85	0.964	0.942	GMP_Granulocytes
FUT4	0.110264	2.33629e-89	6.08113e-85	0.145	0.047	GMP_Granulocytes
ATP5MF	0.291197	4.84254e-87	1.26046e-82	0.625	0.516	GMP_Granulocytes
TMEM147	0.21567	6.09021e-87	1.58522e-82	0.693	0.594	GMP_Granulocytes
RPS25	0.107843	1.34951e-85	3.51264e-81	1	1	GMP_Granulocytes
AP2S1	0.222096	4.08231e-85	1.06258e-80	0.812	0.716	GMP_Granulocytes
SNHG19	0.23953	1.16835e-84	3.0411e-80	0.452	0.342	GMP_Granulocytes
UBL5	0.221537	3.16338e-84	8.23395e-80	0.932	0.889	GMP_Granulocytes
ADAM15	0.137147	4.89926e-84	1.27523e-79	0.211	0.105	GMP_Granulocytes
EREG	0.279849	4.77985e-83	1.24415e-78	0.504	0.346	GMP_Granulocytes
CD302	0.180717	5.80938e-83	1.51212e-78	0.377	0.227	GMP_Granulocytes
LINC00926	0.108936	5.88056e-83	1.53065e-78	0.124	0.037	GMP_Granulocytes
SEM1	0.255962	1.67354e-82	4.35607e-78	0.631	0.545	GMP_Granulocytes
RGL4	0.177345	2.13395e-81	5.55446e-77	0.325	0.178	GMP_Granulocytes
UGT3A2	0.104753	2.47495e-81	6.44204e-77	0.15	0.051	GMP_Granulocytes
MCL1	0.225514	5.38426e-80	1.40147e-75	0.516	0.355	GMP_Granulocytes
UQCRH	0.15226	7.46119e-80	1.94207e-75	0.988	0.976	GMP_Granulocytes
TSPOAP1	0.125102	2.13358e-79	5.55349e-75	0.171	0.069	GMP_Granulocytes
NDUFS6	0.19953	9.11574e-79	2.37273e-74	0.819	0.758	GMP_Granulocytes
TSPO	0.190478	1.90002e-78	4.94557e-74	0.888	0.818	GMP_Granulocytes
RPS29	0.23844	2.7122e-78	7.0596e-74	1	0.996	GMP_Granulocytes
EIF3K	0.15532	7.15031e-78	1.86115e-73	0.973	0.962	GMP_Granulocytes
ACTN1	0.189352	1.34101e-77	3.49052e-73	0.429	0.291	GMP_Granulocytes
NKG7	0.15374	1.92783e-77	5.01795e-73	0.374	0.218	GMP_Granulocytes
SURF4	0.180557	1.34133e-76	3.49134e-72	0.37	0.257	GMP_Granulocytes
NDUFA3	0.229809	1.16383e-75	3.02934e-71	0.642	0.555	GMP_Granulocytes
SNRPD1	0.185354	7.96112e-75	2.0722e-70	0.95	0.906	GMP_Granulocytes
TMED10	0.191271	1.51771e-74	3.95045e-70	0.694	0.583	GMP_Granulocytes
METTL26	0.217362	2.7215e-74	7.08378e-70	0.516	0.417	GMP_Granulocytes
XPOT	0.153433	3.67917e-74	9.57651e-70	0.275	0.17	GMP_Granulocytes
MLEC	0.222409	1.50454e-73	3.91617e-69	0.48	0.37	GMP_Granulocytes
FBL	0.187557	4.63576e-73	1.20664e-68	0.917	0.867	GMP_Granulocytes
LMAN1	0.189794	6.59662e-73	1.71703e-68	0.604	0.516	GMP_Granulocytes
NANS	0.189126	4.18096e-72	1.08826e-67	0.568	0.471	GMP_Granulocytes
TOMM7	0.166719	1.95512e-71	5.08899e-67	0.972	0.949	GMP_Granulocytes
CIB1	0.191352	2.07537e-71	5.40198e-67	0.616	0.542	GMP_Granulocytes
RPN2	0.171335	6.97568e-70	1.8157e-65	0.806	0.775	GMP_Granulocytes
SRPRB	0.174814	2.3904e-69	6.22198e-65	0.433	0.331	GMP_Granulocytes
PKM	0.142191	3.07219e-69	7.99659e-65	0.84	0.7	GMP_Granulocytes
FAM107B	0.146656	2.39065e-68	6.22263e-64	0.315	0.177	GMP_Granulocytes
TCEB2	0.152619	2.41402e-68	6.28346e-64	0.292	0.321	GMP_Granulocytes
STT3B	0.186167	3.17407e-68	8.26179e-64	0.462	0.336	GMP_Granulocytes
TRIM14	0.136435	3.86827e-68	1.00687e-63	0.246	0.134	GMP_Granulocytes
BCAP31	0.182302	6.23982e-68	1.62416e-63	0.723	0.662	GMP_Granulocytes
LRMDA	0.132464	2.13623e-67	5.56039e-63	0.222	0.115	GMP_Granulocytes
ZNF593	0.179499	2.54472e-67	6.62364e-63	0.446	0.348	GMP_Granulocytes
MRPL57	0.173598	3.69621e-67	9.62086e-63	0.853	0.812	GMP_Granulocytes
CRYGD	0.194734	3.66759e-66	9.54636e-62	0.545	0.409	GMP_Granulocytes
MRPL33	0.193748	3.80308e-66	9.89904e-62	0.74	0.647	GMP_Granulocytes
C14orf2	0.101239	4.82103e-65	1.25487e-60	0.314	0.361	GMP_Granulocytes
ATP6V0B	0.179952	1.09592e-63	2.85257e-59	0.785	0.726	GMP_Granulocytes
NDUFC2	0.205617	1.52592e-63	3.97183e-59	0.865	0.802	GMP_Granulocytes
TMEM205	0.182629	2.43275e-63	6.33222e-59	0.537	0.431	GMP_Granulocytes
NDRG1	0.123034	3.32947e-63	8.66628e-59	0.208	0.101	GMP_Granulocytes
NDUFS7	0.179947	4.27023e-63	1.1115e-58	0.68	0.606	GMP_Granulocytes
RPL13A	0.13343	5.08463e-63	1.32348e-58	1	1	GMP_Granulocytes
PRSS21	0.19626	8.26853e-62	2.15221e-57	0.209	0.149	GMP_Granulocytes
USMG5	0.125769	1.35731e-61	3.53295e-57	0.299	0.333	GMP_Granulocytes
POLR2I	0.17184	2.66367e-61	6.93327e-57	0.662	0.599	GMP_Granulocytes
MRPL20	0.181695	3.17795e-61	8.27188e-57	0.773	0.71	GMP_Granulocytes
CRELD2	0.13497	6.62443e-61	1.72427e-56	0.224	0.122	GMP_Granulocytes
NDUFB7	0.185323	3.315e-60	8.62861e-56	0.796	0.731	GMP_Granulocytes
ATP5F1E	0.23365	1.34934e-59	3.5122e-55	0.675	0.609	GMP_Granulocytes
EDEM3	0.133613	1.9895e-59	5.17847e-55	0.241	0.133	GMP_Granulocytes
HDLBP	0.164325	3.24231e-59	8.43941e-55	0.421	0.313	GMP_Granulocytes
SLC38A10	0.141493	1.33383e-58	3.47183e-54	0.242	0.15	GMP_Granulocytes
RPL34	0.154125	2.44776e-58	6.37128e-54	1	1	GMP_Granulocytes
COPS9	0.206778	4.7413e-58	1.23411e-53	0.509	0.416	GMP_Granulocytes
HSBP1	0.166344	4.94432e-58	1.28696e-53	0.805	0.753	GMP_Granulocytes
FAH	0.159489	1.58429e-57	4.12374e-53	0.419	0.314	GMP_Granulocytes
RAB27A	0.144933	2.88184e-57	7.50115e-53	0.314	0.2	GMP_Granulocytes
TRAPPC2L	0.166387	4.31703e-57	1.12368e-52	0.536	0.454	GMP_Granulocytes
LAMTOR2	0.184315	7.69898e-57	2.00397e-52	0.68	0.595	GMP_Granulocytes
SNRPF	0.156528	1.17132e-56	3.04883e-52	0.929	0.894	GMP_Granulocytes
VSTM1	0.10091	2.8204e-56	7.34123e-52	0.135	0.061	GMP_Granulocytes
SELENOP	0.11607	6.18023e-56	1.60865e-51	0.196	0.097	GMP_Granulocytes
XBP1	0.178754	1.29634e-55	3.37424e-51	0.705	0.589	GMP_Granulocytes
ATP5G1	0.156368	2.75678e-55	7.17561e-51	0.284	0.291	GMP_Granulocytes
TPI1	0.129001	3.43036e-55	8.92889e-51	0.96	0.906	GMP_Granulocytes
UQCR10	0.169302	5.70047e-55	1.48377e-50	0.894	0.852	GMP_Granulocytes
NGFRAP1	0.158026	6.69116e-55	1.74164e-50	0.278	0.29	GMP_Granulocytes
IGFBP7	0.244469	1.66406e-54	4.33137e-50	0.486	0.394	GMP_Granulocytes
NCOA4	0.165132	2.632e-54	6.85083e-50	0.517	0.45	GMP_Granulocytes
UQCC3	0.163477	5.56614e-54	1.44881e-49	0.414	0.335	GMP_Granulocytes
NIT2	0.15178	2.4444e-53	6.36254e-49	0.532	0.454	GMP_Granulocytes
QSOX1	0.123398	3.55369e-53	9.2499e-49	0.214	0.124	GMP_Granulocytes
SRM	0.206002	3.8324e-53	9.97535e-49	0.466	0.348	GMP_Granulocytes
CTSD	0.163805	1.00596e-52	2.61841e-48	0.579	0.498	GMP_Granulocytes
IFI6	0.165066	3.80175e-52	9.89558e-48	0.381	0.262	GMP_Granulocytes
AK2	0.166452	1.19157e-51	3.10154e-47	0.653	0.567	GMP_Granulocytes
ABHD14A	0.137794	2.14163e-51	5.57444e-47	0.332	0.241	GMP_Granulocytes
NDUFB8	0.171405	1.55913e-50	4.05825e-46	0.851	0.792	GMP_Granulocytes
PYCARD	0.153934	1.56529e-50	4.0743e-46	0.805	0.738	GMP_Granulocytes
MRPL55	0.153872	5.2279e-50	1.36077e-45	0.513	0.46	GMP_Granulocytes
VKORC1	0.162023	8.77924e-50	2.28515e-45	0.599	0.522	GMP_Granulocytes
UQCC2	0.174025	1.08797e-49	2.83187e-45	0.642	0.563	GMP_Granulocytes
COPE	0.15099	2.68701e-49	6.99402e-45	0.849	0.812	GMP_Granulocytes
SNRPE	0.160242	3.9719e-49	1.03385e-44	0.966	0.942	GMP_Granulocytes
PXK	0.124248	4.04525e-49	1.05294e-44	0.261	0.159	GMP_Granulocytes
EEF1E1	0.159321	1.24375e-48	3.23737e-44	0.626	0.548	GMP_Granulocytes
CHCHD2	0.12314	2.46371e-48	6.41278e-44	0.985	0.977	GMP_Granulocytes
TM7SF3	0.159865	5.82188e-48	1.51538e-43	0.436	0.347	GMP_Granulocytes
ALCAM	0.125879	1.30567e-47	3.39852e-43	0.249	0.151	GMP_Granulocytes
APRT	0.143797	1.43867e-47	3.74471e-43	0.899	0.868	GMP_Granulocytes
SLC27A5	0.132408	2.01385e-47	5.24185e-43	0.329	0.252	GMP_Granulocytes
PNP	0.140619	7.42084e-47	1.93157e-42	0.39	0.323	GMP_Granulocytes
NDUFAB1	0.151784	3.86372e-46	1.00569e-41	0.844	0.791	GMP_Granulocytes
LRPAP1	0.14436	5.97098e-46	1.55419e-41	0.565	0.492	GMP_Granulocytes
RPS10	0.164164	6.6648e-46	1.73478e-41	0.98	0.968	GMP_Granulocytes
KCNAB2	0.141255	1.20976e-45	3.14889e-41	0.383	0.283	GMP_Granulocytes
AURKAIP1	0.150889	3.75828e-45	9.78242e-41	0.711	0.647	GMP_Granulocytes
MAN1A1	0.133386	8.17155e-45	2.12697e-40	0.308	0.203	GMP_Granulocytes
KDELR2	0.155233	1.12225e-44	2.9211e-40	0.444	0.348	GMP_Granulocytes
LPCAT2	0.133047	1.7187e-44	4.47359e-40	0.291	0.186	GMP_Granulocytes
TIMM8B	0.167854	2.93047e-44	7.62772e-40	0.737	0.661	GMP_Granulocytes
TBC1D1	0.122163	3.56677e-44	9.28395e-40	0.265	0.169	GMP_Granulocytes
MFSD1	0.14667	8.64491e-44	2.25018e-39	0.437	0.347	GMP_Granulocytes
CUTA	0.160996	2.61446e-43	6.80519e-39	0.886	0.841	GMP_Granulocytes
EIF3A	0.153008	3.63449e-43	9.46022e-39	0.77	0.708	GMP_Granulocytes
DPCD	0.113599	4.8332e-43	1.25803e-38	0.25	0.18	GMP_Granulocytes
MIF4GD	0.141393	1.86511e-42	4.85468e-38	0.42	0.333	GMP_Granulocytes
MRPL51	0.154589	2.49452e-42	6.493e-38	0.837	0.791	GMP_Granulocytes
EAF2	0.148106	2.90061e-42	7.54999e-38	0.605	0.527	GMP_Granulocytes
PET100	0.172229	4.25477e-42	1.10748e-37	0.525	0.462	GMP_Granulocytes
DCXR	0.152013	7.30666e-42	1.90185e-37	0.561	0.49	GMP_Granulocytes
FAM162A	0.140814	3.56454e-41	9.27814e-37	0.564	0.493	GMP_Granulocytes
ATP8B4	0.121644	4.37597e-41	1.13902e-36	0.259	0.164	GMP_Granulocytes
LSM7	0.1415	1.64845e-40	4.29076e-36	0.944	0.918	GMP_Granulocytes
KRTCAP2	0.133958	2.05985e-40	5.36158e-36	0.391	0.318	GMP_Granulocytes
MORN2	0.118769	2.4438e-40	6.36097e-36	0.31	0.228	GMP_Granulocytes
COX14	0.143449	2.65516e-40	6.91112e-36	0.625	0.581	GMP_Granulocytes
LMAN2	0.122459	3.00718e-40	7.82739e-36	0.688	0.662	GMP_Granulocytes
LRPPRC	0.134932	4.95219e-40	1.28901e-35	0.392	0.312	GMP_Granulocytes
MRPS21	0.149893	1.16815e-39	3.04056e-35	0.834	0.806	GMP_Granulocytes
ANAPC11	0.151049	1.89678e-39	4.93713e-35	0.754	0.678	GMP_Granulocytes
VMA21	0.135643	3.15884e-39	8.22215e-35	0.475	0.402	GMP_Granulocytes
COTL1	0.122318	4.49627e-39	1.17033e-34	0.356	0.246	GMP_Granulocytes
DPP7	0.131801	9.37888e-39	2.44123e-34	0.636	0.576	GMP_Granulocytes
EIF3B	0.141356	1.52913e-38	3.98017e-34	0.434	0.339	GMP_Granulocytes
RPA3	0.157342	3.7084e-38	9.65258e-34	0.743	0.652	GMP_Granulocytes
ATP5MC3	0.179359	6.64527e-38	1.7297e-33	0.653	0.589	GMP_Granulocytes
EEF1D	0.102409	2.42229e-37	6.30497e-33	0.989	0.986	GMP_Granulocytes
TMEM208	0.131799	2.7614e-37	7.18765e-33	0.488	0.419	GMP_Granulocytes
IRAK3	0.125471	3.1331e-37	8.15514e-33	0.316	0.226	GMP_Granulocytes
ARMH1	0.154557	1.03344e-36	2.68994e-32	0.493	0.386	GMP_Granulocytes
CD33	0.112484	1.24903e-36	3.25111e-32	0.315	0.214	GMP_Granulocytes
COX7A2	0.14623	1.33228e-36	3.4678e-32	0.958	0.94	GMP_Granulocytes
ZFAND5	0.132405	3.0786e-36	8.01329e-32	0.359	0.282	GMP_Granulocytes
HIGD2A	0.132828	7.18314e-36	1.8697e-31	0.823	0.775	GMP_Granulocytes
TESC	0.112179	1.68839e-35	4.3947e-31	0.262	0.178	GMP_Granulocytes
TXNDC17	0.139406	4.64384e-35	1.20874e-30	0.666	0.605	GMP_Granulocytes
GSTO1	0.13248	1.21072e-34	3.15139e-30	0.864	0.819	GMP_Granulocytes
RPL36A	0.191456	4.40498e-34	1.14657e-29	0.97	0.938	GMP_Granulocytes
MRPL17	0.108576	4.50961e-34	1.17381e-29	0.406	0.358	GMP_Granulocytes
AZI2	0.111007	5.03877e-34	1.31154e-29	0.256	0.179	GMP_Granulocytes
DMAC1	0.141612	9.73137e-34	2.53298e-29	0.438	0.365	GMP_Granulocytes
C16orf13	0.10117	1.1576e-33	3.01312e-29	0.199	0.196	GMP_Granulocytes
NORAD	0.108281	2.67199e-33	6.95492e-29	0.263	0.181	GMP_Granulocytes
SMCHD1	0.127337	2.9051e-33	7.56168e-29	0.347	0.268	GMP_Granulocytes
SSBP1	0.12183	3.25638e-33	8.47604e-29	0.889	0.864	GMP_Granulocytes
GADD45GIP1	0.153837	6.58184e-33	1.71319e-28	0.586	0.519	GMP_Granulocytes
BRI3BP	0.112584	1.30688e-32	3.40168e-28	0.316	0.234	GMP_Granulocytes
CNPY2	0.127137	2.35667e-32	6.13418e-28	0.622	0.577	GMP_Granulocytes
CHCHD5	0.111379	2.71612e-32	7.06978e-28	0.442	0.408	GMP_Granulocytes
TMED9	0.106585	1.59044e-31	4.13975e-27	0.744	0.724	GMP_Granulocytes
MGST3	0.122741	9.31855e-31	2.42552e-26	0.695	0.632	GMP_Granulocytes
STT3A	0.104033	1.25733e-30	3.27269e-26	0.313	0.244	GMP_Granulocytes
FMC1	0.122002	3.823e-30	9.95088e-26	0.299	0.236	GMP_Granulocytes
MCFD2	0.106736	5.96675e-30	1.55308e-25	0.375	0.326	GMP_Granulocytes
HDGF	0.130103	2.6896e-29	7.00076e-25	0.479	0.395	GMP_Granulocytes
ATP5PF	0.156819	3.27441e-29	8.52297e-25	0.639	0.575	GMP_Granulocytes
ASRGL1	0.109073	5.10803e-29	1.32957e-24	0.318	0.251	GMP_Granulocytes
IPO5	0.106256	5.83119e-29	1.5178e-24	0.38	0.311	GMP_Granulocytes
ABRACL	0.104531	1.64619e-28	4.28486e-24	0.825	0.802	GMP_Granulocytes
PSMA7	0.106182	2.02828e-28	5.2794e-24	0.921	0.905	GMP_Granulocytes
PM20D2	0.107345	2.26898e-28	5.90593e-24	0.328	0.263	GMP_Granulocytes
NDUFS8	0.120967	6.68213e-28	1.73929e-23	0.721	0.685	GMP_Granulocytes
TRMT112	0.119912	7.29742e-28	1.89944e-23	0.886	0.87	GMP_Granulocytes
RUVBL2	0.120132	9.61498e-28	2.50268e-23	0.578	0.526	GMP_Granulocytes
MRPL41	0.121373	9.8431e-28	2.56206e-23	0.449	0.391	GMP_Granulocytes
TMED3	0.111636	1.62749e-27	4.23619e-23	0.599	0.544	GMP_Granulocytes
NDUFA2	0.131151	2.23469e-27	5.81668e-23	0.779	0.726	GMP_Granulocytes
OST4	0.112318	2.26318e-27	5.89082e-23	0.932	0.918	GMP_Granulocytes
NOP16	0.106279	2.39617e-27	6.23698e-23	0.365	0.315	GMP_Granulocytes
PSENEN	0.112895	2.4862e-27	6.47133e-23	0.442	0.39	GMP_Granulocytes
RNASET2	0.124614	4.38348e-27	1.14098e-22	0.527	0.475	GMP_Granulocytes
TRAPPC6A	0.115925	8.25627e-27	2.14902e-22	0.595	0.558	GMP_Granulocytes
COX7C	0.100743	1.45435e-26	3.78552e-22	0.995	0.987	GMP_Granulocytes
ZSCAN16-AS1	0.103809	1.65712e-26	4.31332e-22	0.304	0.261	GMP_Granulocytes
MRPS18C	0.113663	1.87094e-26	4.86987e-22	0.655	0.618	GMP_Granulocytes
MRPS12	0.107537	1.60373e-25	4.17435e-21	0.552	0.51	GMP_Granulocytes
PPIH	0.110717	1.76179e-25	4.58576e-21	0.555	0.497	GMP_Granulocytes
LAMP2	0.101195	2.60121e-25	6.7707e-21	0.399	0.34	GMP_Granulocytes
MRPL52	0.12278	1.21887e-24	3.1726e-20	0.655	0.601	GMP_Granulocytes
WDR61	0.100485	2.29894e-24	5.9839e-20	0.551	0.52	GMP_Granulocytes
IFT57	0.101252	2.58718e-24	6.73416e-20	0.397	0.339	GMP_Granulocytes
MZT2A	0.103728	5.62826e-24	1.46498e-19	0.596	0.574	GMP_Granulocytes
PGLS	0.1036	1.07918e-22	2.80901e-18	0.544	0.519	GMP_Granulocytes
ALKBH7	0.102256	2.19492e-22	5.71317e-18	0.655	0.614	GMP_Granulocytes
SNRPG	0.113727	3.86528e-22	1.00609e-17	0.886	0.836	GMP_Granulocytes
WDR83OS	0.103086	3.87046e-22	1.00744e-17	0.781	0.753	GMP_Granulocytes
SCAND1	0.102508	1.48241e-21	3.85858e-17	0.643	0.609	GMP_Granulocytes
MRPS33	0.107343	1.96078e-21	5.10371e-17	0.664	0.61	GMP_Granulocytes
COX6A1	0.11038	2.40779e-21	6.26725e-17	0.907	0.892	GMP_Granulocytes
CH17-373J23.1	0.138362	1.51883e-20	3.95337e-16	0.175	0.152	GMP_Granulocytes
UQCRC1	0.102464	2.14816e-20	5.59145e-16	0.602	0.561	GMP_Granulocytes
DDT	0.105746	3.03574e-20	7.90174e-16	0.823	0.795	GMP_Granulocytes
TMEM256	0.102533	1.23545e-19	3.21575e-15	0.649	0.626	GMP_Granulocytes
ATP5PO	0.14187	3.94314e-19	1.02636e-14	0.647	0.582	GMP_Granulocytes
NDUFB1	0.120411	6.59553e-19	1.71675e-14	0.683	0.651	GMP_Granulocytes
BEX1	0.147314	3.68555e-18	9.59313e-14	0.125	0.104	GMP_Granulocytes
PTRHD1	0.102391	1.17516e-17	3.05883e-13	0.716	0.676	GMP_Granulocytes
C1QBP	0.133494	4.05256e-15	1.05484e-10	0.53	0.474	GMP_Granulocytes
ATP5PD	0.100123	1.13206e-13	2.94663e-09	0.55	0.493	GMP_Granulocytes
ATP5MG	0.13413	9.08387e-13	2.36444e-08	0.674	0.615	GMP_Granulocytes
LRRC75A	0.144568	1.84193e-12	4.79435e-08	0.428	0.405	GMP_Granulocytes
S100A10	2.29517	0	0	0.941	0.171	Monocytes
LYZ	2.1943	0	0	0.951	0.389	Monocytes
CST3	1.94774	0	0	0.962	0.443	Monocytes
ANXA2	1.76805	0	0	0.982	0.261	Monocytes
LGALS1	1.69025	0	0	0.997	0.488	Monocytes
SAMHD1	1.56764	0	0	0.955	0.121	Monocytes
FCER1G	1.56464	0	0	0.968	0.213	Monocytes
IRF8	1.29042	0	0	0.868	0.206	Monocytes
CD74	1.20746	0	0	1	0.952	Monocytes
CORO1A	1.20718	0	0	0.996	0.713	Monocytes
HLA-DRB1	1.20713	0	0	0.994	0.775	Monocytes
HLA-DPA1	1.17058	0	0	0.993	0.838	Monocytes
HLA-DRA	1.11039	0	0	1	0.943	Monocytes
PLAC8	1.10024	0	0	0.979	0.867	Monocytes
GPR183	1.07569	0	0	0.753	0.085	Monocytes
C12orf75	1.06227	0	0	0.926	0.296	Monocytes
S100A4	1.02076	0	0	1	0.873	Monocytes
HLA-DPB1	0.987263	0	0	0.997	0.835	Monocytes
HLA-DMB	0.985172	0	0	0.905	0.262	Monocytes
CYBA	0.980077	0	0	0.999	0.885	Monocytes
S100A11	0.956556	0	0	0.855	0.298	Monocytes
TMSB10	0.901557	0	0	1	0.996	Monocytes
ACTB	0.884094	0	0	1	0.997	Monocytes
ALDH2	0.856696	0	0	0.808	0.288	Monocytes
DBI	0.849945	0	0	0.987	0.77	Monocytes
ANXA5	0.830016	0	0	0.828	0.302	Monocytes
MYL12A	0.821938	0	0	0.993	0.887	Monocytes
IGSF6	0.808767	0	0	0.629	0.043	Monocytes
JAML	0.802505	0	0	0.782	0.131	Monocytes
LY86	0.77223	0	0	0.741	0.104	Monocytes
CFL1	0.754739	0	0	1	0.982	Monocytes
CTSH	0.730871	0	0	0.572	0.02	Monocytes
FGL2	0.553671	0	0	0.508	0.03	Monocytes
MTMR11	0.528858	0	0	0.455	0.014	Monocytes
ABI3	0.508002	0	0	0.432	0.016	Monocytes
AXL	0.426001	0	0	0.312	0.002	Monocytes
VIM	1.06175	0	0	0.999	0.847	Monocytes
FCGRT	0.834598	0	0	0.908	0.387	Monocytes
ITGB2	0.776306	0	0	0.858	0.365	Monocytes
TYROBP	0.94921	0	0	0.876	0.251	Monocytes
ARPC2	0.66632	0	2.13022e-304	0.996	0.943	Monocytes
CLEC4A	0.424389	7.90242e-305	2.05692e-300	0.442	0.02	Monocytes
RNASE6	0.893078	5.66996e-302	1.47583e-297	0.817	0.178	Monocytes
CACNA2D3	0.410978	1.98046e-301	5.15494e-297	0.386	0.011	Monocytes
SH3BGRL3	0.761697	6.49885e-297	1.69158e-292	0.997	0.908	Monocytes
LSP1	0.900692	1.35061e-291	3.5155e-287	0.957	0.541	Monocytes
RNH1	0.748494	1.58253e-289	4.11916e-285	0.881	0.438	Monocytes
GRN	0.794668	1.66979e-286	4.34628e-282	0.888	0.404	Monocytes
CFP	0.67976	3.86468e-286	1.00594e-281	0.551	0.073	Monocytes
PLP2	0.852204	9.92378e-285	2.58306e-280	0.94	0.546	Monocytes
ARPC1B	0.903919	4.32155e-284	1.12486e-279	0.941	0.671	Monocytes
HLA-DQB1	0.897964	1.54858e-282	4.03079e-278	0.827	0.311	Monocytes
CES1	0.422779	3.83097e-281	9.97163e-277	0.305	0.004	Monocytes
CALM1	0.780131	5.77384e-281	1.50287e-276	0.96	0.721	Monocytes
CD86	0.405036	2.71584e-280	7.06906e-276	0.378	0.013	Monocytes
MYL6	0.620208	1.90496e-275	4.95843e-271	1	0.969	Monocytes
TMSB4X	0.936474	2.40341e-275	6.25584e-271	1	0.997	Monocytes
LILRB4	0.494328	8.04744e-272	2.09467e-267	0.53	0.054	Monocytes
PLD4	0.79797	3.22793e-267	8.40198e-263	0.808	0.209	Monocytes
HLA-DMA	0.739063	6.30639e-255	1.64149e-250	0.969	0.679	Monocytes
NDRG2	0.490453	2.20436e-250	5.73773e-246	0.45	0.036	Monocytes
KCTD12	0.415502	1.16512e-245	3.03268e-241	0.4	0.023	Monocytes
TIFAB	0.431369	5.86011e-244	1.52533e-239	0.467	0.041	Monocytes
HLA-DRB5	0.796862	2.823e-243	7.34799e-239	0.911	0.533	Monocytes
ARPC3	0.534713	7.4084e-241	1.92833e-236	0.994	0.964	Monocytes
CAP1	0.67015	2.11524e-238	5.50577e-234	0.941	0.678	Monocytes
PFN1	0.647392	5.39666e-238	1.4047e-233	1	0.96	Monocytes
TGFBI	0.406875	4.74078e-232	1.23398e-227	0.375	0.026	Monocytes
COTL1	0.743324	3.0936e-228	8.05233e-224	0.689	0.247	Monocytes
UPK3A	0.29024	2.74419e-222	7.14286e-218	0.311	0.012	Monocytes
CAPG	0.720047	7.42201e-222	1.93188e-217	0.907	0.449	Monocytes
AP2S1	0.605329	1.41656e-218	3.68717e-214	0.944	0.72	Monocytes
CLEC10A	0.297828	1.09479e-213	2.84963e-209	0.206	0.001	Monocytes
ZFP36	0.711955	2.49898e-212	6.5046e-208	0.729	0.227	Monocytes
HLA-DQA1	0.76573	5.68502e-212	1.47975e-207	0.753	0.296	Monocytes
SPIB	0.422873	1.09142e-206	2.84086e-202	0.469	0.065	Monocytes
OAZ1	0.519413	1.14127e-205	2.9706e-201	0.996	0.978	Monocytes
CD2	0.433728	1.60346e-205	4.17365e-201	0.403	0.036	Monocytes
HCK	0.335791	2.99075e-205	7.78463e-201	0.34	0.02	Monocytes
H2AFZ	0.732052	3.2703e-199	8.51227e-195	0.997	0.942	Monocytes
CSF2RA	0.382931	2.70019e-196	7.02833e-192	0.435	0.049	Monocytes
CTSV	0.320225	3.21994e-194	8.38119e-190	0.236	0.005	Monocytes
IGKC	0.442443	8.19698e-192	2.13359e-187	0.501	0.083	Monocytes
S100A6	0.904703	3.67503e-183	9.56574e-179	0.969	0.713	Monocytes
CD300C	0.248728	2.4061e-180	6.26283e-176	0.238	0.007	Monocytes
MPEG1	0.299486	5.23646e-180	1.363e-175	0.371	0.038	Monocytes
TNNI2	0.37837	1.73273e-178	4.51011e-174	0.435	0.06	Monocytes
SRP14	0.472556	6.80829e-176	1.77213e-171	0.997	0.981	Monocytes
EMP3	0.672205	2.3973e-174	6.23994e-170	0.909	0.518	Monocytes
ST14	0.209471	3.50254e-174	9.11677e-170	0.269	0.013	Monocytes
LGMN	0.410816	9.1178e-174	2.37327e-169	0.453	0.071	Monocytes
COX8A	0.532462	1.50577e-173	3.91936e-169	0.975	0.833	Monocytes
BLOC1S1	0.562624	1.3963e-172	3.63444e-168	0.904	0.593	Monocytes
SNRNP25	0.59277	5.28648e-168	1.37602e-163	0.858	0.477	Monocytes
MS4A4A	0.401728	2.73455e-166	7.11776e-162	0.431	0.062	Monocytes
PKM	0.595315	3.48779e-165	9.07836e-161	0.979	0.707	Monocytes
ITGB7	0.333731	5.29073e-165	1.37712e-160	0.357	0.036	Monocytes
BTLA	0.235328	3.80581e-164	9.90615e-160	0.248	0.012	Monocytes
CSTA	0.93781	5.3168e-163	1.38391e-158	0.625	0.18	Monocytes
CXCR4	0.695806	3.6701e-159	9.55289e-155	0.968	0.607	Monocytes
PYCARD	0.543317	7.90954e-159	2.05878e-154	0.948	0.74	Monocytes
ERP29	0.493415	5.6968e-158	1.48282e-153	0.987	0.888	Monocytes
SUB1	0.45032	2.74503e-157	7.14504e-153	0.994	0.947	Monocytes
GPX1	0.981676	4.69012e-156	1.22079e-151	0.603	0.35	Monocytes
HERPUD1	0.677244	6.5616e-155	1.70792e-150	0.763	0.327	Monocytes
NKG7	0.462392	4.14451e-153	1.07877e-148	0.689	0.222	Monocytes
ALOX5AP	0.583378	4.85857e-153	1.26464e-148	0.519	0.112	Monocytes
STXBP2	0.546454	5.14243e-151	1.33852e-146	0.71	0.302	Monocytes
RAB11FIP1	0.548803	7.53405e-151	1.96104e-146	0.605	0.183	Monocytes
CXCR3	0.257701	4.78767e-149	1.24618e-144	0.22	0.01	Monocytes
HLA-B	0.545723	7.75745e-149	2.01919e-144	1	0.99	Monocytes
VPS29	0.525586	8.88316e-147	2.3122e-142	0.916	0.655	Monocytes
BLNK	0.28652	1.44016e-143	3.74859e-139	0.512	0.136	Monocytes
GSTP1	0.497577	1.63389e-143	4.25284e-139	0.999	0.965	Monocytes
LILRA4	0.493191	2.97022e-143	7.73119e-139	0.301	0.03	Monocytes
PTPRE	0.518912	1.07003e-142	2.78518e-138	0.66	0.215	Monocytes
TUBA1B	0.685045	1.84209e-142	4.79477e-138	1	0.945	Monocytes
B3GNT7	0.2859	2.23431e-141	5.81569e-137	0.282	0.023	Monocytes
CRIP1	0.295983	8.63144e-141	2.24668e-136	0.296	0.027	Monocytes
PSMB9	0.551923	5.37278e-140	1.39848e-135	0.921	0.636	Monocytes
MNDA	0.728573	2.79862e-138	7.28452e-134	0.463	0.099	Monocytes
ARPC5	0.505159	4.93612e-138	1.28482e-133	0.94	0.755	Monocytes
GSN	0.503238	6.39533e-138	1.66464e-133	0.734	0.293	Monocytes
ENHO	0.172127	3.06139e-135	7.96848e-131	0.146	0.002	Monocytes
FCER1A	0.836892	4.63892e-135	1.20746e-130	0.711	0.262	Monocytes
VAMP8	0.461186	4.19196e-134	1.09112e-129	0.997	0.95	Monocytes
PPM1J	0.19054	9.1726e-134	2.38753e-129	0.18	0.006	Monocytes
HAMP	0.208007	1.63779e-131	4.263e-127	0.169	0.004	Monocytes
RGS10	0.511989	1.28634e-129	3.34822e-125	0.824	0.467	Monocytes
KCNE5	0.566482	8.69801e-129	2.26401e-124	0.527	0.146	Monocytes
RAB31	0.274823	3.7617e-128	9.79133e-124	0.336	0.047	Monocytes
DPYSL2	0.374718	2.30676e-127	6.00427e-123	0.48	0.116	Monocytes
RBM47	0.224744	3.01244e-127	7.84108e-123	0.29	0.032	Monocytes
FOS	0.634292	3.87727e-127	1.00921e-122	0.937	0.62	Monocytes
SERPINB8	0.389275	4.79869e-127	1.24905e-122	0.541	0.148	Monocytes
KLF4	0.349947	8.56422e-127	2.22918e-122	0.358	0.056	Monocytes
FAM105A	0.315316	1.81492e-125	4.72406e-121	0.278	0.028	Monocytes
UCP2	0.517964	7.25259e-125	1.88778e-120	0.854	0.531	Monocytes
FBP1	0.276453	2.69239e-124	7.00801e-120	0.307	0.038	Monocytes
UGCG	0.340488	3.54673e-124	9.23178e-120	0.409	0.08	Monocytes
CTSZ	0.502857	1.80381e-123	4.69515e-119	0.506	0.161	Monocytes
AHNAK	0.47727	1.36598e-122	3.55551e-118	0.616	0.214	Monocytes
MYO1E	0.222923	1.71136e-122	4.45451e-118	0.222	0.015	Monocytes
PAK1	0.426366	3.06713e-122	7.98343e-118	0.548	0.18	Monocytes
TPM3	0.445915	9.73882e-122	2.53492e-117	0.975	0.839	Monocytes
MS4A7	0.29654	1.52793e-121	3.97704e-117	0.364	0.061	Monocytes
DHRS9	0.205578	4.73545e-121	1.23259e-116	0.232	0.019	Monocytes
DDIT4	0.530142	1.72978e-120	4.50245e-116	0.717	0.288	Monocytes
FGD2	0.222538	3.62642e-120	9.4392e-116	0.233	0.018	Monocytes
FGR	0.232024	1.18443e-119	3.08295e-115	0.197	0.01	Monocytes
CD48	0.532851	1.44244e-119	3.75453e-115	0.721	0.319	Monocytes
NAGA	0.334121	2.32192e-119	6.04372e-115	0.446	0.104	Monocytes
RNASE2	0.745205	3.13383e-119	8.15705e-115	0.722	0.318	Monocytes
SERF2	0.373258	3.53309e-119	9.19628e-115	1	0.989	Monocytes
ACTR3	0.46413	7.20906e-119	1.87645e-114	0.873	0.608	Monocytes
P2RY6	0.139083	8.05183e-119	2.09581e-114	0.128	0.001	Monocytes
ARL4C	0.378937	6.14965e-118	1.60069e-113	0.392	0.076	Monocytes
CLEC12A	0.437908	1.57604e-116	4.10227e-112	0.562	0.18	Monocytes
LILRA2	0.31867	1.71492e-113	4.46376e-109	0.409	0.087	Monocytes
TK1	0.561938	1.39123e-112	3.62122e-108	0.707	0.305	Monocytes
IRF7	0.429648	3.62382e-111	9.43244e-107	0.464	0.12	Monocytes
SLAMF7	0.222562	1.71454e-110	4.46277e-106	0.234	0.021	Monocytes
PLBD1	0.154624	2.32449e-109	6.05042e-105	0.116	0.001	Monocytes
SEMA4A	0.291684	2.53557e-109	6.59984e-105	0.37	0.073	Monocytes
IQGAP1	0.403215	2.81596e-109	7.32965e-105	0.644	0.255	Monocytes
HCLS1	0.435749	3.52207e-109	9.16759e-105	0.812	0.47	Monocytes
C20orf27	0.475333	1.22216e-108	3.18117e-104	0.781	0.451	Monocytes
CD63	0.479733	1.35823e-108	3.53533e-104	0.954	0.809	Monocytes
SHTN1	0.217785	1.90136e-108	4.94906e-104	0.24	0.024	Monocytes
PSME2	0.446205	2.8188e-108	7.33704e-104	0.964	0.821	Monocytes
CD180	0.223828	1.37669e-106	3.5834e-102	0.296	0.043	Monocytes
PGAM1	0.439978	9.37819e-106	2.44105e-101	0.919	0.672	Monocytes
SEL1L3	0.279449	1.13394e-105	2.95152e-101	0.336	0.06	Monocytes
SPATS2L	0.317764	1.40596e-105	3.65956e-101	0.382	0.084	Monocytes
HAVCR2	0.234909	1.69919e-105	4.42282e-101	0.269	0.035	Monocytes
FAM49B	0.445834	3.99527e-104	1.03993e-99	0.799	0.493	Monocytes
ARPC4	0.442142	6.21475e-103	1.61764e-98	0.837	0.586	Monocytes
C1orf162	0.523568	1.20029e-102	3.12423e-98	0.632	0.293	Monocytes
DAPP1	0.327382	1.24703e-102	3.24589e-98	0.445	0.117	Monocytes
PLEK	0.421559	2.5387e-102	6.60798e-98	0.856	0.486	Monocytes
ATP6V0E1	0.426363	4.27384e-102	1.11244e-97	0.957	0.77	Monocytes
PARK7	0.367666	1.34852e-101	3.51006e-97	0.994	0.92	Monocytes
RHOC	0.383487	2.31502e-101	6.02576e-97	0.494	0.15	Monocytes
B2M	0.336236	3.83277e-101	9.97633e-97	1	1	Monocytes
HMGN2	0.460336	6.58342e-101	1.7136e-96	0.99	0.94	Monocytes
ZWINT	0.474204	1.30138e-100	3.38737e-96	0.709	0.35	Monocytes
IFI27L2	0.371318	2.4431e-100	6.35913e-96	0.685	0.295	Monocytes
RP11-356J5.12	0.178144	3.37744e-99	8.79115e-95	0.128	0.003	Monocytes
SEPT9	0.41166	6.90719e-99	1.79787e-94	0.635	0.26	Monocytes
PHACTR1	0.391686	5.22561e-98	1.36017e-93	0.605	0.234	Monocytes
STMN1	0.433316	6.41162e-98	1.66888e-93	0.996	0.973	Monocytes
PARVG	0.40574	1.06846e-97	2.78109e-93	0.76	0.4	Monocytes
HMGB2	0.66909	1.10827e-97	2.88471e-93	0.961	0.893	Monocytes
GNB2L1	0.122269	1.99052e-97	5.18112e-93	0.601	0.368	Monocytes
DBNL	0.423741	7.08918e-97	1.84524e-92	0.756	0.436	Monocytes
LCP1	0.461182	6.30069e-96	1.64001e-91	0.868	0.595	Monocytes
MYO1F	0.357326	2.66327e-95	6.93223e-91	0.559	0.207	Monocytes
CCDC50	0.447292	2.72991e-95	7.10568e-91	0.449	0.129	Monocytes
RP11-1143G9.4	0.488379	1.39268e-94	3.625e-90	0.223	0.027	Monocytes
SLC25A5	0.348717	2.59126e-94	6.74478e-90	0.994	0.945	Monocytes
ZNF503	0.160747	2.60413e-94	6.77829e-90	0.177	0.013	Monocytes
RPA3	0.446428	4.50152e-94	1.1717e-89	0.901	0.655	Monocytes
PFDN2	0.404241	4.67149e-94	1.21594e-89	0.897	0.707	Monocytes
SERTAD3	0.239224	1.87596e-93	4.88294e-89	0.317	0.06	Monocytes
TYMP	0.245178	2.10799e-93	5.48689e-89	0.275	0.045	Monocytes
FAM111B	0.35735	2.90982e-93	7.57397e-89	0.428	0.12	Monocytes
TUBA1A	0.502003	1.29381e-92	3.36767e-88	0.888	0.644	Monocytes
MRPL33	0.427494	2.07782e-92	5.40837e-88	0.894	0.65	Monocytes
KCNMB1	0.203652	3.60276e-92	9.37763e-88	0.257	0.037	Monocytes
MARCH1	0.144464	3.93516e-92	1.02428e-87	0.166	0.012	Monocytes
FABP5	0.40236	3.21593e-91	8.37075e-87	0.98	0.854	Monocytes
LRRC25	0.154993	6.25832e-91	1.62898e-86	0.185	0.016	Monocytes
REEP5	0.366676	7.49289e-91	1.95032e-86	0.66	0.296	Monocytes
TMEM109	0.4143	8.57726e-91	2.23257e-86	0.707	0.372	Monocytes
ATP6V0B	0.402981	1.26544e-90	3.2938e-86	0.922	0.727	Monocytes
IL3RA	0.373147	6.85394e-90	1.78401e-85	0.445	0.131	Monocytes
ADGRE5	0.331122	2.19689e-89	5.71829e-85	0.481	0.157	Monocytes
RBX1	0.376448	2.33018e-89	6.06522e-85	0.967	0.853	Monocytes
SULF2	0.189991	3.42141e-89	8.90559e-85	0.244	0.036	Monocytes
RUNX2	0.304612	4.76742e-89	1.24091e-84	0.467	0.146	Monocytes
C10orf54	0.384417	7.23317e-89	1.88272e-84	0.342	0.078	Monocytes
SCN9A	0.254128	8.5248e-89	2.21892e-84	0.297	0.055	Monocytes
CYBB	0.172139	5.21553e-88	1.35755e-83	0.248	0.043	Monocytes
TAGLN2	0.396957	2.67352e-87	6.95891e-83	0.967	0.847	Monocytes
NDUFA12	0.375537	3.89878e-87	1.01481e-82	0.929	0.759	Monocytes
TNFAIP2	0.179143	2.20693e-86	5.74441e-82	0.232	0.032	Monocytes
SH2B3	0.267585	3.34378e-86	8.70352e-82	0.357	0.086	Monocytes
CKS1B	0.542311	1.9791e-85	5.1514e-81	0.798	0.542	Monocytes
RGS19	0.378583	8.64084e-85	2.24912e-80	0.671	0.326	Monocytes
IL13RA1	0.16233	3.14648e-84	8.18998e-80	0.166	0.013	Monocytes
MVP	0.23325	9.8237e-84	2.55701e-79	0.304	0.062	Monocytes
NDUFB2	0.380001	2.03129e-82	5.28726e-78	0.961	0.817	Monocytes
AKR1B1	0.397579	3.30805e-82	8.61053e-78	0.838	0.547	Monocytes
TPP1	0.345613	3.47252e-82	9.03863e-78	0.593	0.255	Monocytes
NUDT1	0.382982	2.03543e-81	5.29801e-77	0.868	0.63	Monocytes
NTAN1	0.272345	4.89857e-81	1.27505e-76	0.4	0.115	Monocytes
ATP5E	0.69146	1.3924e-80	3.62427e-76	0.601	0.355	Monocytes
TMBIM6	0.365792	1.91776e-80	4.99174e-76	0.947	0.786	Monocytes
TIMP1	0.461019	6.46758e-80	1.68345e-75	0.738	0.437	Monocytes
YWHAB	0.341708	7.02729e-80	1.82913e-75	0.967	0.885	Monocytes
RETN	0.243093	8.88692e-80	2.31318e-75	0.216	0.03	Monocytes
IL6R	0.267344	1.30419e-79	3.39466e-75	0.428	0.134	Monocytes
CTSS	0.403127	1.36126e-79	3.54321e-75	0.736	0.42	Monocytes
SNRPG	0.385018	1.71811e-79	4.47207e-75	0.961	0.838	Monocytes
DAB2	0.275012	3.65591e-79	9.51596e-75	0.367	0.098	Monocytes
ANXA1	0.482584	4.67206e-79	1.21609e-74	0.933	0.759	Monocytes
TPI1	0.384426	6.71313e-79	1.74736e-74	0.983	0.91	Monocytes
DDT	0.367417	7.81043e-79	2.03298e-74	0.933	0.795	Monocytes
NDUFA6	0.379607	1.20659e-78	3.14064e-74	0.851	0.574	Monocytes
CLSPN	0.383154	4.92015e-78	1.28067e-73	0.593	0.271	Monocytes
CENPM	0.405782	9.18183e-78	2.38994e-73	0.629	0.305	Monocytes
NDUFV2	0.365946	1.98121e-77	5.15689e-73	0.923	0.763	Monocytes
FUT7	0.332975	9.41572e-77	2.45082e-72	0.391	0.12	Monocytes
POMP	0.346009	2.62845e-76	6.84158e-72	0.976	0.846	Monocytes
ATP5J2	0.620451	7.25332e-76	1.88797e-71	0.566	0.311	Monocytes
CNPY3	0.37764	2.20748e-75	5.74585e-71	0.844	0.585	Monocytes
KIAA0101	0.696507	2.38822e-75	6.21629e-71	0.544	0.249	Monocytes
COX17	0.39245	2.47192e-75	6.43416e-71	0.777	0.503	Monocytes
ROGDI	0.311581	1.10413e-74	2.87394e-70	0.453	0.165	Monocytes
SCPEP1	0.283909	4.66054e-74	1.21309e-69	0.466	0.167	Monocytes
BRK1	0.337032	5.07498e-74	1.32097e-69	0.961	0.853	Monocytes
RPS6KA4	0.269322	8.65176e-74	2.25197e-69	0.372	0.109	Monocytes
UBE2L3	0.359916	8.98842e-74	2.3396e-69	0.908	0.735	Monocytes
NDUFA4	0.288313	1.14864e-73	2.98978e-69	0.997	0.967	Monocytes
BASP1	0.314198	2.809e-73	7.31154e-69	0.396	0.123	Monocytes
CHCHD2	0.279838	1.16602e-72	3.03504e-68	0.994	0.978	Monocytes
CD302	0.281687	2.37856e-72	6.19116e-68	0.554	0.234	Monocytes
NUCKS1	0.387075	2.5131e-72	6.54136e-68	0.961	0.836	Monocytes
CAPN2	0.227592	3.3055e-72	8.6039e-68	0.305	0.074	Monocytes
LSM4	0.377915	6.70266e-72	1.74464e-67	0.884	0.686	Monocytes
GPSM3	0.361713	1.40891e-71	3.66725e-67	0.805	0.526	Monocytes
COX7B	0.354085	2.42801e-71	6.31987e-67	0.982	0.881	Monocytes
RAD51AP1	0.348024	3.20587e-71	8.34457e-67	0.552	0.244	Monocytes
WDFY2	0.325178	9.48487e-71	2.46882e-66	0.628	0.305	Monocytes
PSMB3	0.343535	1.15947e-70	3.01797e-66	0.953	0.818	Monocytes
FUOM	0.286254	2.69229e-70	7.00775e-66	0.446	0.161	Monocytes
TMED10	0.355862	4.16489e-70	1.08408e-65	0.845	0.588	Monocytes
NPC2	0.341428	4.51996e-70	1.1765e-65	0.929	0.701	Monocytes
ATP5L	0.630461	1.31003e-69	3.40989e-65	0.603	0.365	Monocytes
LSM3	0.342963	3.44264e-69	8.96084e-65	0.936	0.786	Monocytes
NAPSA	0.101109	5.49229e-69	1.42959e-64	0.103	0.004	Monocytes
CCND3	0.31197	1.86099e-68	4.84398e-64	0.635	0.31	Monocytes
CARHSP1	0.346707	3.95999e-68	1.03075e-63	0.739	0.431	Monocytes
TMA7	0.317304	4.10452e-68	1.06837e-63	0.986	0.941	Monocytes
ADRB2	0.209886	6.41023e-68	1.66852e-63	0.293	0.071	Monocytes
ATP6V0D1	0.309889	1.01714e-67	2.64752e-63	0.644	0.331	Monocytes
CXorf21	0.338083	3.75571e-67	9.77573e-63	0.576	0.263	Monocytes
FAM129A	0.275598	3.77063e-67	9.81458e-63	0.437	0.162	Monocytes
GABARAP	0.245328	5.17752e-67	1.34766e-62	0.328	0.092	Monocytes
UNC119	0.218654	5.48702e-67	1.42822e-62	0.301	0.076	Monocytes
PCNA	0.462297	9.63582e-67	2.50811e-62	0.855	0.634	Monocytes
OSTF1	0.306848	1.32461e-66	3.44784e-62	0.621	0.309	Monocytes
ITM2C	0.368286	2.57337e-66	6.69822e-62	0.912	0.693	Monocytes
CDK1	0.456243	3.79967e-66	9.89016e-62	0.485	0.217	Monocytes
LY96	0.19233	4.22181e-66	1.09889e-61	0.247	0.052	Monocytes
MKI67	0.386626	5.12952e-66	1.33516e-61	0.51	0.213	Monocytes
HN1	0.528208	9.85602e-66	2.56542e-61	0.431	0.181	Monocytes
CD22	0.151795	1.29414e-65	3.36851e-61	0.212	0.04	Monocytes
CD53	0.350458	2.74423e-65	7.14295e-61	0.881	0.634	Monocytes
TUBB	0.47271	3.61734e-65	9.41558e-61	0.957	0.882	Monocytes
CNN2	0.305411	4.24394e-65	1.10465e-60	0.594	0.29	Monocytes
TRAPPC1	0.354667	4.41989e-65	1.15045e-60	0.862	0.677	Monocytes
CCDC167	0.307541	4.62505e-65	1.20385e-60	0.611	0.303	Monocytes
TFEB	0.109699	4.75861e-65	1.23862e-60	0.158	0.018	Monocytes
GPR160	0.144107	1.32744e-64	3.4552e-60	0.185	0.027	Monocytes
ACTR2	0.36886	1.3446e-64	3.49985e-60	0.805	0.567	Monocytes
EIF5	0.359846	3.26866e-64	8.50799e-60	0.84	0.575	Monocytes
NCF2	0.130367	4.62052e-64	1.20268e-59	0.156	0.018	Monocytes
THEMIS2	0.275381	5.51473e-64	1.43543e-59	0.37	0.119	Monocytes
NFKB1	0.272356	7.88876e-64	2.05337e-59	0.43	0.164	Monocytes
HCST	0.351948	1.11884e-63	2.91224e-59	0.821	0.533	Monocytes
RRM2	0.391897	4.85385e-63	1.26341e-58	0.431	0.172	Monocytes
SLC8A1	0.104816	5.93091e-63	1.54376e-58	0.132	0.013	Monocytes
ACTG1	0.299206	7.04545e-63	1.83386e-58	1	0.995	Monocytes
CYSTM1	0.195334	1.06623e-62	2.77528e-58	0.298	0.079	Monocytes
LPXN	0.233151	1.46386e-62	3.81028e-58	0.314	0.088	Monocytes
COX7A2	0.314096	1.87839e-62	4.88925e-58	0.994	0.94	Monocytes
KIAA0930	0.251664	1.96758e-62	5.12143e-58	0.449	0.174	Monocytes
KIF17	0.169206	2.02853e-62	5.28006e-58	0.225	0.045	Monocytes
TUBB6	0.275328	2.41016e-62	6.27341e-58	0.386	0.133	Monocytes
KPNA2	0.448217	8.44532e-62	2.19823e-57	0.603	0.319	Monocytes
C7orf50	0.298151	3.03996e-61	7.91272e-57	0.522	0.244	Monocytes
PSMA4	0.311058	3.11096e-61	8.09752e-57	0.979	0.884	Monocytes
LGALS3	0.134338	1.20445e-60	3.13505e-56	0.11	0.008	Monocytes
RASSF4	0.134565	2.05498e-60	5.34891e-56	0.144	0.015	Monocytes
HNRNPA2B1	0.303788	2.93549e-60	7.64079e-56	0.997	0.961	Monocytes
UBE2C	0.669919	4.57109e-60	1.18981e-55	0.533	0.262	Monocytes
IRF5	0.24768	6.99178e-60	1.81989e-55	0.409	0.151	Monocytes
ATP5J	0.559299	1.45557e-59	3.7887e-55	0.584	0.337	Monocytes
PPP1CA	0.317927	1.53804e-59	4.00337e-55	0.915	0.742	Monocytes
GLIPR1	0.276611	2.74504e-59	7.14506e-55	0.674	0.368	Monocytes
HDAC9	0.166748	2.82548e-59	7.35444e-55	0.29	0.081	Monocytes
NAGK	0.272866	3.27418e-59	8.52236e-55	0.471	0.198	Monocytes
HSPB11	0.339584	5.41396e-59	1.4092e-54	0.852	0.623	Monocytes
HMGN1	0.402966	9.26314e-59	2.4111e-54	0.975	0.872	Monocytes
COX6A1	0.298323	1.76578e-58	4.59616e-54	0.978	0.892	Monocytes
SMCO4	0.252239	1.18697e-57	3.08956e-53	0.427	0.166	Monocytes
RAB7A	0.339364	1.44181e-57	3.75289e-53	0.812	0.602	Monocytes
CYCS	0.355	2.65415e-57	6.90849e-53	0.877	0.708	Monocytes
JAK2	0.172825	2.82797e-57	7.36093e-53	0.258	0.064	Monocytes
CCR2	0.114324	3.46724e-57	9.02488e-53	0.153	0.021	Monocytes
JUNB	0.417891	5.40975e-57	1.4081e-52	0.471	0.223	Monocytes
TUBB4B	0.498606	5.44405e-57	1.41703e-52	0.756	0.537	Monocytes
UNC93B1	0.191313	6.78045e-57	1.76488e-52	0.248	0.06	Monocytes
NUSAP1	0.398638	8.4658e-57	2.20356e-52	0.577	0.296	Monocytes
SMIM14	0.216696	1.25108e-56	3.25644e-52	0.374	0.134	Monocytes
IL17RA	0.210858	3.71878e-56	9.67962e-52	0.351	0.118	Monocytes
SMC2	0.348906	3.77781e-56	9.83327e-52	0.725	0.46	Monocytes
UBE2E2	0.14878	7.05571e-56	1.83653e-51	0.273	0.077	Monocytes
TRIM22	0.248366	9.50453e-56	2.47393e-51	0.459	0.193	Monocytes
BCL6	0.109959	1.1377e-55	2.96133e-51	0.151	0.02	Monocytes
CYTH4	0.150747	1.19382e-55	3.1074e-51	0.265	0.076	Monocytes
S100B	0.162846	1.49846e-55	3.90034e-51	0.188	0.034	Monocytes
ECHDC1	0.297967	2.05234e-55	5.34203e-51	0.612	0.341	Monocytes
NREP	0.346028	2.48308e-55	6.46321e-51	0.764	0.54	Monocytes
[truncated: 11,764 more rows]

## Sheet: Elderly
Gene	avg_logFC	p_value	p_value_adjusted	pct_expression_CellType	pct_expression_Rest	CellType
CRHBP	1.3287	0	0	0.843	0.247	HSC
FOS	1.2291	0	0	0.93	0.821	HSC
AREG	1.03958	0	0	0.691	0.446	HSC
HOPX	0.988492	0	0	0.825	0.333	HSC
CTD-3252C9.4	0.916214	0	0	0.544	0.275	HSC
BST2	0.908529	0	0	0.917	0.688	HSC
AVP	0.865115	0	0	0.247	0.087	HSC
CXCL8	0.849154	0	0	0.192	0.051	HSC
IDS	0.842164	0	0	0.695	0.396	HSC
FOSB	0.829443	0	0	0.696	0.522	HSC
JUNB	0.818426	0	0	0.631	0.527	HSC
CD164	0.816178	0	0	0.917	0.757	HSC
CD52	0.790298	0	0	0.787	0.442	HSC
TSC22D3	0.764558	0	0	0.807	0.647	HSC
CD74	0.763765	0	0	0.994	0.926	HSC
ZFP36	0.758292	0	0	0.688	0.472	HSC
NR4A2	0.728705	0	0	0.484	0.257	HSC
HLA-DPA1	0.710515	0	0	0.949	0.816	HSC
TUBA1A	0.700376	0	0	0.715	0.633	HSC
MLLT3	0.695347	0	0	0.627	0.382	HSC
KIAA0125	0.688799	0	0	0.585	0.361	HSC
EIF4A2	0.648069	0	0	0.93	0.854	HSC
PRDX1	0.64569	0	0	0.975	0.895	HSC
AC011139.1	0.641827	0	0	0.192	0.067	HSC
ID1	0.634176	0	0	0.335	0.159	HSC
CD37	0.633445	0	0	0.93	0.832	HSC
MDK	0.632943	0	0	0.604	0.317	HSC
HLA-DRA	0.630497	0	0	0.989	0.909	HSC
HLA-E	0.628727	0	0	0.92	0.808	HSC
SDPR	0.617522	0	0	0.347	0.195	HSC
ANKRD28	0.609219	0	0	0.797	0.68	HSC
HLA-DPB1	0.608376	0	0	0.921	0.804	HSC
NR4A1	0.601185	0	0	0.387	0.193	HSC
LST1	0.589755	0	0	0.613	0.43	HSC
CIRBP	0.586235	0	0	0.97	0.932	HSC
GLTSCR2	0.55745	0	0	0.517	0.353	HSC
PCDH9	0.552379	0	0	0.463	0.225	HSC
FXYD5	0.549982	0	0	0.973	0.944	HSC
HSPB1	0.539855	0	0	0.793	0.707	HSC
EVI2B	0.521574	0	0	0.529	0.32	HSC
ARL4A	0.512776	0	0	0.492	0.408	HSC
HLA-DQB1	0.510278	0	0	0.359	0.149	HSC
TSC22D1	0.506068	0	0	0.726	0.665	HSC
PPP1R15A	0.496073	0	0	0.605	0.531	HSC
ICAM3	0.494186	0	0	0.785	0.668	HSC
COMMD6	0.487315	0	0	0.962	0.952	HSC
DUSP1	0.486885	0	0	0.587	0.507	HSC
CLU	0.486363	0	0	0.429	0.278	HSC
EIF3E	0.485293	0	0	0.997	0.982	HSC
SELL	0.483555	0	0	0.754	0.53	HSC
ZFAS1	0.483388	0	0	0.997	0.986	HSC
SNHG8	0.481767	0	0	0.948	0.912	HSC
BEX2	0.481186	0	0	0.565	0.395	HSC
SYPL1	0.481039	0	0	0.777	0.697	HSC
BEX1	0.479113	0	0	0.321	0.136	HSC
JUN	0.471542	0	0	0.321	0.193	HSC
CHMP1B	0.46332	0	0	0.521	0.459	HSC
MCL1	0.459891	0	0	0.583	0.517	HSC
EPB41L4A-AS1	0.456983	0	0	0.803	0.743	HSC
C6orf48	0.456683	0	0	0.969	0.938	HSC
TPT1	0.45262	0	0	1	1	HSC
RPL31	0.450498	0	0	1	0.998	HSC
HLA-DQA1	0.445622	0	0	0.436	0.261	HSC
IFITM3	0.441193	0	0	0.517	0.369	HSC
SOCS2	0.438676	0	0	0.442	0.278	HSC
AIF1	0.437201	0	0	0.954	0.833	HSC
MYCT1	0.429354	0	0	0.412	0.25	HSC
YPEL5	0.42779	0	0	0.488	0.432	HSC
RPL34	0.41997	0	0	1	1	HSC
HLA-DRB5	0.419471	0	0	0.671	0.584	HSC
GNB2L1	0.417606	0	0	0.721	0.546	HSC
EGFL7	0.41674	0	0	0.781	0.707	HSC
SPINK2	0.410985	0	0	0.944	0.606	HSC
HSD17B11	0.410841	0	0	0.729	0.682	HSC
BIRC3	0.408591	0	0	0.255	0.092	HSC
H1F0	0.407275	0	0	0.422	0.3	HSC
VAMP5	0.403671	0	0	0.646	0.498	HSC
VIM	0.393044	0	0	0.975	0.9	HSC
CD44	0.390769	0	0	0.647	0.588	HSC
RHOC	0.389082	0	0	0.341	0.184	HSC
HEMGN	0.388252	0	0	0.436	0.243	HSC
SEPP1	0.388026	0	0	0.238	0.092	HSC
DUSP6	0.387548	0	0	0.372	0.261	HSC
MYADM	0.37749	0	0	0.415	0.372	HSC
LAPTM5	0.376338	0	0	0.812	0.782	HSC
GLIPR1	0.372756	0	0	0.462	0.311	HSC
NRIP1	0.370624	0	0	0.445	0.365	HSC
MEG3	0.368345	0	0	0.167	0.015	HSC
MALAT1	0.360215	0	0	0.998	0.998	HSC
JAML	0.360057	0	0	0.238	0.081	HSC
IL18	0.355354	0	0	0.55	0.496	HSC
RPL11	0.354621	0	0	1	1	HSC
HLA-DMA	0.351823	0	0	0.704	0.653	HSC
RPS4Y1	0.351177	0	0	0.967	0.967	HSC
MT-ND2	0.349302	0	0	0.999	0.996	HSC
EEF2	0.349141	0	0	0.994	0.983	HSC
EIF1	0.349118	0	0	0.999	0.998	HSC
SRSF5	0.343594	0	0	0.964	0.962	HSC
ATF3	0.342087	0	0	0.15	0.05	HSC
CLEC9A	0.339007	0	0	0.22	0.054	HSC
GIMAP2	0.338704	0	0	0.349	0.246	HSC
NACA	0.33798	0	0	1	0.999	HSC
RARRES3	0.336764	0	0	0.453	0.376	HSC
FTH1	0.336604	0	0	1	0.992	HSC
RPL9	0.33645	0	0	1	1	HSC
AJ006998.2	0.33422	0	0	0.2	0.043	HSC
NEAT1	0.333772	0	0	0.735	0.728	HSC
EVI2A	0.328244	0	0	0.27	0.14	HSC
PFDN5	0.326539	0	0	0.997	0.995	HSC
CD69	0.325704	0	0	0.549	0.482	HSC
NPR3	0.32519	0	0	0.475	0.409	HSC
SAT2	0.324358	0	0	0.369	0.271	HSC
RP11-598F7.3	0.322815	0	0	0.203	0.052	HSC
HLA-DRB1	0.322732	0	0	0.724	0.663	HSC
SELM	0.322672	0	0	0.152	0.012	HSC
RPL7	0.322474	0	0	1	1	HSC
SNHG12	0.322286	0	0	0.342	0.267	HSC
EIF3D	0.320211	0	0	0.886	0.887	HSC
TM4SF1	0.320117	0	0	0.211	0.089	HSC
ST13	0.316253	0	0	0.882	0.885	HSC
PTPRC	0.312732	0	0	0.501	0.459	HSC
HINT1	0.311946	0	0	1	0.995	HSC
LAPTM4A	0.309446	0	0	0.722	0.719	HSC
TNFRSF14	0.305956	0	0	0.341	0.25	HSC
ALDH1A1	0.304226	0	0	0.573	0.477	HSC
RPL35A	0.303286	0	0	1	1	HSC
TNFSF10	0.303128	0	0	0.249	0.14	HSC
GUCY1A3	0.30263	0	0	0.204	0.085	HSC
RPL30	0.298029	0	0	1	1	HSC
VAMP2	0.297776	0	0	0.51	0.483	HSC
LINC00936	0.294377	0	0	0.193	0.086	HSC
SNHG7	0.294292	0	0	0.568	0.578	HSC
TCEAL2	0.292583	0	0	0.149	0.014	HSC
LINC00493	0.29094	0	0	0.463	0.409	HSC
RAB13	0.290222	0	0	0.56	0.568	HSC
CLEC2B	0.289955	0	0	0.459	0.418	HSC
RPS4X	0.289719	0	0	1	1	HSC
RPL13	0.285808	0	0	1	1	HSC
FO538757.2	0.285728	0	0	0.364	0.307	HSC
RPL36AL	0.284939	0	0	0.976	0.98	HSC
ITM2B	0.284196	0	0	0.752	0.756	HSC
DNAJC4	0.276198	0	0	0.465	0.451	HSC
EMP1	0.273963	0	0	0.159	0.063	HSC
SSBP2	0.273655	0	0	0.489	0.455	HSC
RIC3	0.270008	0	0	0.18	0.06	HSC
PDZK1IP1	0.269724	0	0	0.151	0.031	HSC
BNIP3L	0.269667	0	0	0.491	0.496	HSC
SKAP1	0.266316	0	0	0.193	0.072	HSC
ARHGDIB	0.262668	0	0	0.981	0.975	HSC
PTGS1	0.26171	0	0	0.235	0.168	HSC
EEF1A1	0.26087	0	0	1	1	HSC
ATP1B1	0.259825	0	0	0.277	0.214	HSC
NFKBIA	0.259571	0	0	0.464	0.489	HSC
SYF2	0.259397	0	0	0.629	0.661	HSC
KRT18	0.259168	0	0	0.239	0.163	HSC
LINC01122	0.259038	0	0	0.204	0.095	HSC
RPL5	0.258338	0	0	1	1	HSC
KLF6	0.258	0	0	0.457	0.47	HSC
MSRB3	0.255399	0	0	0.386	0.357	HSC
RSL1D1	0.254494	0	0	0.835	0.861	HSC
VPS51	0.252612	0	0	0.476	0.504	HSC
BEX5	0.251784	0	0	0.173	0.058	HSC
RGS10	0.251354	0	0	0.51	0.514	HSC
GBP4	0.249337	0	0	0.264	0.182	HSC
WBP5	0.249296	0	0	0.277	0.222	HSC
TOMM7	0.248414	0	0	0.921	0.941	HSC
SERPINB6	0.24772	0	0	0.55	0.534	HSC
HLF	0.246952	0	0	0.146	0.027	HSC
GSTM5	0.24564	0	0	0.232	0.167	HSC
PHLDB2	0.244366	0	0	0.153	0.055	HSC
TMEM173	0.244108	0	0	0.546	0.566	HSC
RPL21	0.243866	0	0	1	0.999	HSC
RP1-313I6.12	0.242555	0	0	0.171	0.1	HSC
RBPMS	0.242066	0	0	0.186	0.079	HSC
PCBD1	0.240505	0	0	0.417	0.436	HSC
GABARAPL2	0.240239	0	0	0.652	0.692	HSC
EIF2S3	0.238734	0	0	0.583	0.629	HSC
HLA-DQA2	0.238532	0	0	0.201	0.115	HSC
C10orf54	0.2372	0	0	0.232	0.159	HSC
CLDN15	0.236349	0	0	0.198	0.103	HSC
FAU	0.229553	0	0	1	0.999	HSC
RPS27A	0.229144	0	0	1	1	HSC
LETMD1	0.228605	0	0	0.381	0.386	HSC
CCDC42	0.228182	0	0	0.156	0.078	HSC
GIMAP1	0.227881	0	0	0.156	0.054	HSC
PHACTR1	0.227632	0	0	0.331	0.305	HSC
MSI2	0.226726	0	0	0.588	0.602	HSC
GIMAP7	0.22616	0	0	0.176	0.089	HSC
RPS6	0.226133	0	0	1	1	HSC
ZFAND1	0.225195	0	0	0.411	0.434	HSC
CD34	0.2246	0	0	0.511	0.507	HSC
EMCN	0.223662	0	0	0.129	0.017	HSC
UBXN1	0.223351	0	0	0.712	0.77	HSC
GPAT3	0.223143	0	0	0.143	0.039	HSC
CARD19	0.222996	0	0	0.376	0.356	HSC
PBXIP1	0.222094	0	0	0.265	0.212	HSC
RPS3A	0.22183	0	0	1	1	HSC
ACSM3	0.221608	0	0	0.279	0.266	HSC
CD59	0.221307	0	0	0.457	0.485	HSC
LIMCH1	0.22126	0	0	0.13	0.021	HSC
ISCU	0.220229	0	0	0.486	0.532	HSC
C1orf21	0.219412	0	0	0.34	0.342	HSC
RPS9	0.218262	0	0	1	1	HSC
SPINT2	0.218128	0	0	0.706	0.756	HSC
BCL2A1	0.217404	0	0	0.17	0.08	HSC
ANXA5	0.217067	0	0	0.284	0.268	HSC
NPC2	0.217058	0	0	0.647	0.686	HSC
MRPL16	0.216811	0	0	0.602	0.672	HSC
SQSTM1	0.215837	0	0	0.358	0.387	HSC
FTL	0.215232	0	0	1	0.998	HSC
C9orf43	0.215208	0	0	0.257	0.199	HSC
SELK	0.213967	0	0	0.349	0.327	HSC
SERP1	0.213883	0	0	0.85	0.886	HSC
RILPL2	0.212768	0	0	0.549	0.627	HSC
ELMO1	0.210773	0	0	0.372	0.374	HSC
PABPC1	0.210574	0	0	0.994	0.991	HSC
IFITM2	0.209938	0	0	0.553	0.563	HSC
RP11-347P5.1	0.209819	0	0	0.163	0.088	HSC
WASH1	0.209462	0	0	0.272	0.247	HSC
BIN1	0.208235	0	0	0.245	0.168	HSC
BEX4	0.207316	0	0	0.573	0.628	HSC
CFH	0.207031	0	0	0.143	0.058	HSC
PNISR	0.206982	0	0	0.864	0.898	HSC
MAGED2	0.205626	0	0	0.385	0.409	HSC
TMEM255B	0.204712	0	0	0.19	0.128	HSC
TFPI	0.202799	0	0	0.259	0.235	HSC
TSPYL1	0.20272	0	0	0.271	0.279	HSC
UCHL1	0.202061	0	0	0.167	0.103	HSC
RNF125	0.201794	0	0	0.22	0.178	HSC
CCND3	0.201245	0	0	0.345	0.317	HSC
RPL26	0.200993	0	0	1	0.999	HSC
ADAM28	0.200662	0	0	0.193	0.127	HSC
CTSS	0.199578	0	0	0.425	0.437	HSC
NFKBID	0.199231	0	0	0.171	0.123	HSC
CASP4	0.198607	0	0	0.513	0.569	HSC
RPL3	0.198189	0	0	1	1	HSC
VPS37B	0.197237	0	0	0.274	0.281	HSC
ARMCX1	0.196199	0	0	0.23	0.203	HSC
RP11-589C21.6	0.195795	0	0	0.104	0.017	HSC
PRKG2	0.195432	0	0	0.187	0.125	HSC
RSL24D1	0.194205	0	0	0.826	0.879	HSC
RPS3	0.193003	0	0	1	1	HSC
EID1	0.192875	0	0	0.894	0.924	HSC
HOXB-AS3	0.19263	0	0	0.129	0.044	HSC
NBEAL1	0.191983	0	0	0.765	0.813	HSC
HTR1F	0.191247	0	0	0.225	0.188	HSC
CDH7	0.191171	0	0	0.106	0.015	HSC
HMGA2	0.191003	0	0	0.18	0.129	HSC
SKP1	0.190518	0	0	0.904	0.926	HSC
EIF3H	0.190394	0	0	0.944	0.959	HSC
KLF10	0.190375	0	0	0.257	0.256	HSC
CSRNP1	0.189514	0	0	0.148	0.09	HSC
MEIS1	0.189367	0	0	0.216	0.17	HSC
CRYGD	0.188177	0	0	0.406	0.424	HSC
RABGAP1	0.18743	0	0	0.235	0.214	HSC
ILF3-AS1	0.185784	0	0	0.235	0.215	HSC
ABHD14B	0.185253	0	0	0.509	0.582	HSC
LDOC1	0.185158	0	0	0.144	0.067	HSC
UBC	0.185048	0	0	0.874	0.901	HSC
CCNH	0.183932	0	0	0.401	0.474	HSC
TAGAP	0.183872	0	0	0.175	0.134	HSC
LRBA	0.183662	0	0	0.295	0.314	HSC
RPL10A	0.183652	0	0	1	0.999	HSC
MECOM	0.183602	0	0	0.143	0.08	HSC
CAMLG	0.18335	0	0	0.623	0.688	HSC
EIF3G	0.182874	0	0	0.817	0.882	HSC
RAB34	0.18283	0	0	0.41	0.466	HSC
GNAI1	0.182534	0	0	0.232	0.189	HSC
TAOK3	0.181786	0	0	0.584	0.655	HSC
ANXA6	0.181117	0	0	0.246	0.217	HSC
SARAF	0.1804	0	0	0.772	0.835	HSC
HSPA1A	0.179745	0	0	0.312	0.31	HSC
PHF1	0.179428	0	0	0.133	0.078	HSC
CALN1	0.179348	0	0	0.16	0.094	HSC
FGFR1OP2	0.178938	0	0	0.474	0.539	HSC
RPS12	0.178367	0	0	1	1	HSC
SPG20	0.177324	0	0	0.18	0.151	HSC
RPL38	0.17711	0	0	0.999	0.996	HSC
NACA2	0.176755	0	0	0.427	0.492	HSC
RAB37	0.175556	0	0	0.351	0.373	HSC
CLIC2	0.17537	0	0	0.157	0.113	HSC
FIS1	0.174163	0	0	0.59	0.678	HSC
RPL12	0.174113	0	0	1	0.998	HSC
TMEM59	0.173906	0	0	0.752	0.822	HSC
TM2D3	0.17313	0	0	0.286	0.314	HSC
RP11-367G6.3	0.173029	0	0	0.142	0.09	HSC
DDX5	0.172779	0	0	0.873	0.915	HSC
FHL1	0.172287	0	0	0.309	0.288	HSC
PIK3IP1	0.170823	0	0	0.147	0.074	HSC
ANAPC16	0.170361	0	0	0.601	0.694	HSC
CRYL1	0.170258	0	0	0.21	0.19	HSC
CYSLTR1	0.169939	0	0	0.208	0.164	HSC
LTA4H	0.169473	0	0	0.421	0.489	HSC
KDELR1	0.168443	0	0	0.507	0.588	HSC
SULT1C4	0.16827	0	0	0.125	0.056	HSC
ERICH1	0.168207	0	0	0.33	0.374	HSC
STOM	0.167978	0	0	0.299	0.324	HSC
ZSCAN18	0.167728	0	0	0.227	0.22	HSC
IGBP1	0.167321	0	0	0.581	0.661	HSC
KRT8	0.167003	0	0	0.137	0.081	HSC
RPL32	0.166795	0	0	1	1	HSC
TMEM91	0.164734	0	0	0.176	0.135	HSC
RPS24	0.164236	0	0	1	1	HSC
GCHFR	0.164005	0	0	0.257	0.255	HSC
C19orf60	0.163902	0	0	0.308	0.308	HSC
LYRM1	0.163526	0	0	0.216	0.207	HSC
RPL15	0.160875	0	0	1	1	HSC
LYRM5	0.160424	0	0	0.218	0.201	HSC
DNAJB9	0.160403	0	0	0.16	0.136	HSC
TCEAL4	0.157998	0	0	0.465	0.533	HSC
GSTM3	0.155842	0	0	0.178	0.183	HSC
C11orf1	0.155713	0	0	0.375	0.449	HSC
GUCY1B3	0.155433	0	0	0.13	0.084	HSC
ACAP1	0.155357	0	0	0.46	0.535	HSC
ERG	0.155017	0	0	0.296	0.305	HSC
RGP1	0.154634	0	0	0.152	0.12	HSC
RABAC1	0.153525	0	0	0.633	0.687	HSC
MBOAT7	0.153335	0	0	0.284	0.287	HSC
STK17B	0.153232	0	0	0.274	0.296	HSC
OPTN	0.152885	0	0	0.156	0.113	HSC
RGL4	0.152655	0	0	0.184	0.149	HSC
CNN3	0.152571	0	0	0.11	0.05	HSC
ROBO4	0.152449	0	0	0.114	0.047	HSC
TNFRSF1A	0.152174	0	0	0.366	0.411	HSC
IFRD1	0.152046	0	0	0.244	0.275	HSC
WBP2	0.15143	0	0	0.222	0.233	HSC
UBR5-AS1	0.151136	0	0	0.163	0.125	HSC
PRKCH	0.15104	0	0	0.132	0.073	HSC
SORL1	0.150657	0	0	0.277	0.268	HSC
ZFYVE21	0.150591	0	0	0.175	0.167	HSC
LEPROT	0.150384	0	0	0.516	0.585	HSC
CCDC115	0.149924	0	0	0.307	0.356	HSC
EIF1B	0.149147	0	0	0.563	0.66	HSC
RPL24	0.148497	0	0	1	1	HSC
ADPRM	0.14832	0	0	0.201	0.191	HSC
TCTEX1D1	0.148131	0	0	0.194	0.168	HSC
MPG	0.148092	0	0	0.518	0.612	HSC
NAP1L3	0.147915	0	0	0.13	0.082	HSC
N4BP2L2	0.146817	0	0	0.648	0.733	HSC
TATDN1	0.146746	0	0	0.358	0.426	HSC
CD300A	0.146123	0	0	0.21	0.191	HSC
RPL13A	0.14543	0	0	1	1	HSC
TRIM22	0.145306	0	0	0.199	0.171	HSC
LMNA	0.145231	0	0	0.209	0.231	HSC
GUCY1A1	0.145169	0	0	0.163	0.181	HSC
SQRDL	0.144687	0	0	0.126	0.085	HSC
NHSL2	0.144555	0	0	0.167	0.156	HSC
DDAH2	0.14444	0	0	0.634	0.682	HSC
TAF7	0.144161	0	0	0.581	0.685	HSC
FAM175A	0.144013	0	0	0.162	0.136	HSC
TCEAL8	0.143973	0	0	0.401	0.484	HSC
TRIP6	0.143907	0	0	0.23	0.25	HSC
SEPW1	0.143588	0	0	0.256	0.273	HSC
CYTIP	0.143571	0	0	0.173	0.153	HSC
SERPING1	0.143471	0	0	0.252	0.273	HSC
HOXA9	0.14346	0	0	0.269	0.284	HSC
CSRP1	0.143332	0	0	0.252	0.29	HSC
OXA1L	0.142769	0	0	0.468	0.581	HSC
C19orf38	0.142134	0	0	0.144	0.102	HSC
RPL8	0.14134	0	0	1	0.999	HSC
AC093673.5	0.140925	0	0	0.104	0.053	HSC
LAIR1	0.140922	0	0	0.318	0.324	HSC
CD83	0.139902	0	0	0.106	0.081	HSC
FAM215B	0.139659	0	0	0.254	0.265	HSC
TIMM9	0.139426	0	0	0.466	0.572	HSC
RPS17	0.139215	0	0	0.818	0.812	HSC
RHOH	0.138817	0	0	0.302	0.356	HSC
GMPR2	0.138467	0	0	0.344	0.421	HSC
C16orf54	0.1384	0	0	0.205	0.233	HSC
LINC01420	0.136504	0	0	0.351	0.365	HSC
RTFDC1	0.136148	0	0	0.32	0.344	HSC
IFI16	0.136127	0	0	0.518	0.567	HSC
RNF220	0.13598	0	0	0.311	0.375	HSC
GSTK1	0.135812	0	0	0.609	0.72	HSC
IFI6	0.135245	0	0	0.269	0.293	HSC
SORBS3	0.134625	0	0	0.115	0.071	HSC
TMEM163	0.134585	0	0	0.114	0.065	HSC
NCOA7	0.134353	0	0	0.275	0.329	HSC
WSB1	0.133968	0	0	0.45	0.539	HSC
STMN3	0.133768	0	0	0.254	0.279	HSC
SCAMP2	0.133449	0	0	0.316	0.384	HSC
APOL3	0.133421	0	0	0.136	0.114	HSC
BIN2	0.133273	0	0	0.429	0.475	HSC
RPL23A	0.132685	0	0	1	1	HSC
IL16	0.132109	0	0	0.178	0.153	HSC
TBC1D10C	0.131941	0	0	0.243	0.252	HSC
NME3	0.1313	0	0	0.291	0.343	HSC
PROM1	0.130356	0	0	0.198	0.186	HSC
PTRF	0.129863	0	0	0.131	0.1	HSC
APP	0.129296	0	0	0.247	0.234	HSC
MAP4K2	0.129277	0	0	0.153	0.136	HSC
SMIM3	0.129194	0	0	0.315	0.332	HSC
LAPTM4B	0.128783	0	0	0.342	0.411	HSC
RPL10	0.128695	0	0	1	1	HSC
RP11-660L16.2	0.128508	0	0	0.133	0.106	HSC
TCEAL1	0.128014	0	0	0.21	0.235	HSC
ESD	0.127406	0	0	0.756	0.846	HSC
SYTL4	0.127399	0	0	0.112	0.075	HSC
SELT	0.126727	0	0	0.235	0.255	HSC
CHMP3	0.126657	0	0	0.233	0.271	HSC
RPS18	0.126393	0	0	1	1	HSC
SPTBN1	0.125701	0	0	0.225	0.212	HSC
SF1	0.125658	0	0	0.672	0.789	HSC
SWAP70	0.125548	0	0	0.178	0.178	HSC
LPIN1	0.125306	0	0	0.2	0.193	HSC
PLSCR1	0.125232	0	0	0.231	0.276	HSC
CCPG1	0.124991	0	0	0.205	0.222	HSC
DAZAP2	0.124665	0	0	0.499	0.612	HSC
FLI1	0.124213	0	0	0.314	0.335	HSC
GPSM3	0.124205	0	0	0.464	0.548	HSC
RPS27	0.124078	0	0	1	1	HSC
CH17-189H20.1	0.123739	0	0	0.142	0.128	HSC
RP11-352M15.2	0.123568	0	0	0.186	0.179	HSC
PRR5	0.123538	0	0	0.132	0.108	HSC
RGS19	0.122439	0	0	0.279	0.311	HSC
LRP10	0.122005	0	0	0.122	0.098	HSC
RBCK1	0.120631	0	0	0.325	0.407	HSC
STX4	0.120301	0	0	0.22	0.265	HSC
PSMD5-AS1	0.120123	0	0	0.139	0.128	HSC
PTGER4	0.1192	0	0	0.128	0.103	HSC
CYB5R1	0.119148	0	0	0.172	0.182	HSC
CD151	0.119093	0	0	0.185	0.219	HSC
PLD3	0.118063	0	0	0.198	0.227	HSC
PSAP	0.117803	0	0	0.434	0.554	HSC
KLHDC8B	0.117549	0	0	0.106	0.083	HSC
SUSD3	0.117392	0	0	0.143	0.127	HSC
DDX3X	0.11723	0	0	0.395	0.486	HSC
NPDC1	0.117145	0	0	0.16	0.161	HSC
ARHGAP15	0.117119	0	0	0.436	0.538	HSC
RPS15A	0.117004	0	0	1	1	HSC
SNAP23	0.116632	0	0	0.27	0.318	HSC
JUND	0.11655	0	0	0.326	0.394	HSC
CTSD	0.116031	0	0	0.466	0.568	HSC
NIFK-AS1	0.115938	0	0	0.194	0.216	HSC
C19orf66	0.115563	0	0	0.176	0.19	HSC
CTA-29F11.1	0.114798	0	0	0.15	0.141	HSC
ALG13	0.114679	0	0	0.198	0.228	HSC
HTATIP2	0.114628	0	0	0.172	0.181	HSC
RBM23	0.114362	0	0	0.205	0.246	HSC
CARD8	0.114213	0	0	0.262	0.314	HSC
SNRPN	0.114072	0	0	0.261	0.318	HSC
ARL6IP5	0.113686	0	0	0.66	0.757	HSC
TPST2	0.11334	0	0	0.269	0.32	HSC
ARID5A	0.11309	0	0	0.162	0.167	HSC
POLR2J3	0.111973	0	0	0.254	0.289	HSC
NSA2	0.111711	0	0	0.694	0.811	HSC
DST	0.111373	0	0	0.164	0.168	HSC
ICA1	0.111263	0	0	0.211	0.256	HSC
C1orf162	0.11116	0	0	0.268	0.301	HSC
FAM212A	0.111036	0	0	0.172	0.184	HSC
NUDT16	0.110219	0	0	0.156	0.164	HSC
MAN2A2	0.109723	0	0	0.163	0.186	HSC
CASP1	0.109513	0	0	0.148	0.14	HSC
IL27RA	0.109465	0	0	0.167	0.186	HSC
LPCAT2	0.109292	0	0	0.194	0.204	HSC
XBP1	0.109257	0	0	0.558	0.633	HSC
UFC1	0.108571	0	0	0.776	0.876	HSC
PNRC1	0.10812	0	0	0.376	0.519	HSC
DYNLT3	0.108033	0	0	0.144	0.143	HSC
CREBRF	0.107657	0	0	0.172	0.175	HSC
RNF7	0.107376	0	0	0.502	0.623	HSC
HEXB	0.107152	0	0	0.206	0.244	HSC
TSPAN32	0.107147	0	0	0.248	0.3	HSC
STARD3	0.106494	0	0	0.165	0.189	HSC
AKR1A1	0.106267	0	0	0.576	0.694	HSC
LITAF	0.105889	0	0	0.227	0.253	HSC
AKR1C3	0.105874	0	0	0.378	0.452	HSC
MPHOSPH8	0.10577	0	0	0.47	0.59	HSC
NFKBIZ	0.105065	0	0	0.186	0.216	HSC
FRMD4B	0.105054	0	0	0.187	0.196	HSC
PCNP	0.104336	0	0	0.41	0.534	HSC
CD300LF	0.103653	0	0	0.121	0.108	HSC
CIR1	0.103472	0	0	0.354	0.46	HSC
SELENOP	0.103341	0	0	0.11	0.117	HSC
RIPK2	0.102927	0	0	0.193	0.233	HSC
WDR83OS	0.102091	0	0	0.683	0.802	HSC
EIF2A	0.102073	0	0	0.483	0.604	HSC
STARD3NL	0.100716	0	0	0.248	0.32	HSC
RGS14	0.100074	0	0	0.151	0.156	HSC
GBP2	0.120971	0	0	0.129	0.095	HSC
ZBTB20	0.120267	0	0	0.283	0.296	HSC
ANGPT1	0.19265	0	3.37441e-306	0.317	0.268	HSC
B2M	0.123708	0	8.89066e-305	1	1	HSC
IFI44L	0.156576	3.24289e-302	8.6449e-298	0.102	0.04	HSC
BTF3	0.127774	1.36092e-296	3.62794e-292	1	0.997	HSC
SVIL	0.119433	8.19968e-296	2.18587e-291	0.111	0.074	HSC
TNFAIP3	0.222723	2.46613e-294	6.57422e-290	0.199	0.144	HSC
SLC2A3	0.134996	2.49419e-294	6.64902e-290	0.116	0.078	HSC
ATP5G2	0.200764	1.06469e-288	2.83826e-284	0.712	0.545	HSC
PSME1	0.109014	1.29996e-288	3.46544e-284	0.862	0.915	HSC
TUBA4A	0.108546	1.20332e-286	3.20781e-282	0.108	0.087	HSC
IGSF10	0.133258	7.36684e-283	1.96385e-278	0.25	0.231	HSC
INPP4B	0.106784	1.89913e-278	5.0627e-274	0.108	0.081	HSC
BTG2	0.219943	3.74896e-278	9.99397e-274	0.245	0.16	HSC
CD200	0.10888	1.13921e-264	3.0369e-260	0.129	0.1	HSC
MX1	0.13678	2.28732e-262	6.09753e-258	0.112	0.064	HSC
CSF3R	0.153518	9.80207e-255	2.61303e-250	0.39	0.363	HSC
MMRN1	0.16165	1.30989e-252	3.49192e-248	0.217	0.165	HSC
RCSD1	0.120576	4.86074e-250	1.29578e-245	0.329	0.312	HSC
CCNI	0.142964	2.42772e-245	6.47181e-241	0.933	0.957	HSC
GSN	0.113704	7.30393e-242	1.94708e-237	0.291	0.278	HSC
MIR155HG	0.10867	1.43123e-235	3.81538e-231	0.118	0.085	HSC
HIST2H2BE	0.130121	8.80006e-231	2.34592e-226	0.105	0.059	HSC
RPL39	0.110644	6.32788e-230	1.68689e-225	1	1	HSC
PDE4B	0.110768	7.34354e-228	1.95764e-223	0.126	0.105	HSC
GCSAML	0.100551	1.43956e-217	3.83757e-213	0.11	0.08	HSC
EIF3L	0.153022	9.01671e-217	2.40367e-212	0.95	0.966	HSC
ID2	0.260158	4.0904e-210	1.09042e-205	0.315	0.259	HSC
MTRNR2L1	0.147179	7.93182e-210	2.11447e-205	0.691	0.674	HSC
CYTL1	0.118173	2.50746e-206	6.68439e-202	0.701	0.696	HSC
NGFRAP1	0.195157	8.58932e-204	2.28974e-199	0.51	0.45	HSC
C19orf43	0.20647	3.3169e-194	8.84218e-190	0.538	0.481	HSC
XXYLT1-AS2	0.120866	3.08799e-188	8.23196e-184	0.103	0.036	HSC
EEF1D	0.144728	2.24302e-182	5.97944e-178	0.986	0.99	HSC
UQCRB	0.134481	1.70591e-172	4.5476e-168	0.978	0.985	HSC
DDIT4	0.161315	8.89986e-136	2.37253e-131	0.435	0.418	HSC
ATP5O	0.17091	3.19435e-96	8.51549e-92	0.625	0.525	HSC
C14orf166	0.13136	4.9161e-55	1.31053e-50	0.572	0.507	HSC
IGLL1	1.12822	0	0	0.956	0.373	LMPP
TUBA1B	0.768114	0	0	0.989	0.851	LMPP
SMIM24	0.732732	0	0	0.955	0.463	LMPP
SPINK2	0.674558	0	0	0.998	0.703	LMPP
GAPDH	0.616083	0	0	1	0.995	LMPP
GYPC	0.567982	0	0	0.981	0.734	LMPP
TNFSF13B	0.548914	0	0	0.745	0.264	LMPP
MGST1	0.548307	0	0	0.869	0.505	LMPP
AC002454.1	0.548056	0	0	0.633	0.204	LMPP
H2AFZ	0.536396	0	0	0.971	0.799	LMPP
STMN1	0.527308	0	0	0.99	0.839	LMPP
FABP5	0.51752	0	0	0.934	0.583	LMPP
ENO1	0.514257	0	0	0.999	0.949	LMPP
HMGN2	0.510756	0	0	0.976	0.81	LMPP
TUBB	0.480271	0	0	0.956	0.814	LMPP
DUT	0.46616	0	0	0.904	0.648	LMPP
NUCB2	0.441797	0	0	0.992	0.846	LMPP
TK1	0.435926	0	0	0.413	0.159	LMPP
MZB1	0.434819	0	0	0.639	0.192	LMPP
PHGDH	0.434728	0	0	0.643	0.217	LMPP
PKM	0.422677	0	0	0.877	0.522	LMPP
TYMS	0.419109	0	0	0.544	0.264	LMPP
CD99	0.410923	0	0	0.916	0.632	LMPP
CSF3R	0.404462	0	0	0.743	0.313	LMPP
CALR	0.404021	0	0	0.962	0.754	LMPP
RAN	0.403312	0	0	0.99	0.845	LMPP
C1QTNF4	0.398156	0	0	0.362	0.111	LMPP
PRSS57	0.388458	0	0	0.974	0.814	LMPP
CDCA7	0.386166	0	0	0.608	0.243	LMPP
MCM7	0.372808	0	0	0.705	0.38	LMPP
SLC25A5	0.371784	0	0	0.991	0.823	LMPP
NAP1L1	0.363972	0	0	1	0.983	LMPP
PCNA	0.36166	0	0	0.667	0.38	LMPP
PRAM1	0.347083	0	0	0.502	0.125	LMPP
GGH	0.339747	0	0	0.544	0.229	LMPP
DHFR	0.33014	0	0	0.465	0.199	LMPP
SPNS3	0.326495	0	0	0.483	0.126	LMPP
NASP	0.321974	0	0	0.894	0.612	LMPP
MT-ND5	0.321094	0	0	0.993	0.94	LMPP
SPARC	0.318149	0	0	0.465	0.121	LMPP
TRBC2	0.313339	0	0	0.396	0.083	LMPP
RANBP1	0.310106	0	0	0.857	0.584	LMPP
ADA	0.309491	0	0	0.642	0.279	LMPP
C1orf228	0.307902	0	0	0.452	0.203	LMPP
GSTP1	0.305614	0	0	0.996	0.952	LMPP
CORO1A	0.300467	0	0	0.829	0.438	LMPP
ITM2C	0.296689	0	0	0.86	0.498	LMPP
LDHA	0.291053	0	0	0.969	0.823	LMPP
CENPH	0.283814	0	0	0.548	0.263	LMPP
C19orf48	0.282552	0	0	0.766	0.466	LMPP
CDK6	0.279218	0	0	0.912	0.657	LMPP
GINS2	0.278608	0	0	0.427	0.182	LMPP
VAMP8	0.277468	0	0	0.989	0.899	LMPP
CYBA	0.271322	0	0	0.97	0.777	LMPP
PPA1	0.270573	0	0	0.913	0.664	LMPP
SNRPB	0.270384	0	0	0.938	0.723	LMPP
IDH2	0.270056	0	0	0.821	0.547	LMPP
ARPC2	0.267465	0	0	0.98	0.863	LMPP
CLDN10	0.261948	0	0	0.421	0.126	LMPP
CD48	0.260931	0	0	0.402	0.115	LMPP
NME1	0.260674	0	0	0.838	0.559	LMPP
PSMB8	0.254306	0	0	0.887	0.63	LMPP
LAT2	0.252277	0	0	0.706	0.366	LMPP
FLT3	0.249298	0	0	0.455	0.178	LMPP
RPA3	0.247302	0	0	0.684	0.412	LMPP
COX5A	0.245086	0	0	0.957	0.771	LMPP
SELL	0.244953	0	0	0.895	0.577	LMPP
MAPKAPK3	0.239895	0	0	0.626	0.337	LMPP
RAB32	0.239557	0	0	0.557	0.266	LMPP
DNMT1	0.231652	0	0	0.63	0.357	LMPP
SNRPD1	0.225832	0	0	0.959	0.77	LMPP
PSMB9	0.212959	0	0	0.75	0.45	LMPP
DBI	0.208593	0	0	0.806	0.528	LMPP
PAICS	0.205598	0	0	0.716	0.446	LMPP
TPM4	0.205417	0	0	0.571	0.286	LMPP
HSH2D	0.204124	0	0	0.585	0.323	LMPP
LSP1	0.201635	0	0	0.681	0.351	LMPP
TMIGD2	0.200866	0	0	0.384	0.134	LMPP
PLAC8	0.190314	0	0	0.938	0.639	LMPP
ITGB2	0.188161	0	0	0.425	0.179	LMPP
CD33	0.184096	0	0	0.332	0.109	LMPP
CPA3	0.183754	0	0	0.383	0.161	LMPP
MIF	0.178325	0	0	0.857	0.608	LMPP
CAPG	0.177602	0	0	0.521	0.236	LMPP
CCT5	0.177224	0	0	0.797	0.54	LMPP
HCST	0.166135	0	0	0.555	0.27	LMPP
CD34	0.165808	0	0	0.733	0.471	LMPP
NAALADL1	0.165788	0	0	0.417	0.182	LMPP
CLEC12A	0.160344	0	0	0.253	0.072	LMPP
PROM1	0.140799	0	0	0.375	0.16	LMPP
SYNGR1	0.133152	0	0	0.629	0.364	LMPP
GLIPR1	0.131887	0	0	0.608	0.334	LMPP
SMIM3	0.125715	0	0	0.539	0.289	LMPP
RPLP1	0.123096	0	0	1	1	LMPP
ATP8B4	0.121492	0	0	0.366	0.171	LMPP
CRYGD	0.10356	0	0	0.62	0.383	LMPP
LITAF	0.101825	0	0	0.422	0.212	LMPP
HELLS	0.275144	0	0	0.484	0.23	LMPP
KCNAB2	0.141368	0	0	0.42	0.203	LMPP
VDAC1	0.204531	0	0	0.811	0.556	LMPP
MYC	0.147868	0	0	0.659	0.413	LMPP
PYGL	0.16576	0	0	0.405	0.183	LMPP
NDUFAB1	0.139578	0	0	0.825	0.592	LMPP
UBE2J1	0.158402	0	0	0.556	0.309	LMPP
MDH1	0.209981	0	0	0.784	0.527	LMPP
PGAM1	0.216101	0	0	0.74	0.478	LMPP
IFI6	0.123492	0	0	0.468	0.252	LMPP
MGST3	0.166081	0	0	0.736	0.482	LMPP
EAF2	0.150066	0	1.32695e-307	0.663	0.414	LMPP
PSME2	0.264205	0	2.41519e-307	0.878	0.654	LMPP
TNFRSF1A	0.147707	0	1.08024e-305	0.6	0.358	LMPP
PYCARD	0.151377	0	1.19286e-305	0.843	0.605	LMPP
MRPS26	0.189588	0	5.49122e-305	0.635	0.379	LMPP
KIAA0101	0.461217	0	7.1653e-305	0.458	0.214	LMPP
SATB1	0.17615	0	8.01058e-305	0.541	0.294	LMPP
FUT7	0.122573	0	1.33255e-304	0.193	0.046	LMPP
RPLP0	0.127892	0	1.33751e-304	1	1	LMPP
GTF3A	0.227255	0	4.79748e-304	0.904	0.684	LMPP
ATP1B3	0.198623	4.28973e-308	1.14356e-303	0.701	0.44	LMPP
TIMM13	0.107497	9.04237e-303	2.41052e-298	0.869	0.659	LMPP
MAD2L1	0.234898	2.09296e-301	5.57943e-297	0.528	0.276	LMPP
HMGB2	0.429585	2.28835e-301	6.10029e-297	0.908	0.728	LMPP
RPL18A	0.11707	3.21058e-301	8.55876e-297	1	1	LMPP
CFL1	0.214845	9.30127e-301	2.47953e-296	0.995	0.942	LMPP
AKR1B1	0.186034	1.20329e-300	3.20774e-296	0.641	0.386	LMPP
CDK4	0.217441	1.45856e-299	3.88822e-295	0.798	0.549	LMPP
RNASEH2B	0.196501	1.72537e-299	4.59949e-295	0.831	0.589	LMPP
LSM4	0.248986	2.62572e-299	6.99964e-295	0.825	0.581	LMPP
CKS1B	0.342804	2.53433e-296	6.75603e-292	0.626	0.369	LMPP
HSPD1	0.221577	9.30481e-296	2.48048e-291	0.964	0.805	LMPP
NUDT1	0.196492	1.43864e-293	3.83514e-289	0.719	0.467	LMPP
PDCD5	0.196289	2.12096e-292	5.65407e-288	0.765	0.517	LMPP
NREP	0.136359	1.34377e-291	3.58222e-287	0.613	0.374	LMPP
RPS16	0.153802	2.38575e-291	6.35992e-287	1	1	LMPP
DCTPP1	0.222131	2.47644e-288	6.6017e-284	0.67	0.415	LMPP
MAP3K8	0.268454	2.47988e-287	6.61085e-283	0.463	0.226	LMPP
ABRACL	0.198653	1.42587e-286	3.80107e-282	0.881	0.66	LMPP
PRDX3	0.139829	1.7899e-286	4.7715e-282	0.778	0.55	LMPP
RAB27A	0.128933	1.0797e-285	2.87827e-281	0.305	0.123	LMPP
UHRF1	0.167892	2.07635e-284	5.53515e-280	0.332	0.131	LMPP
SNRPF	0.179816	8.92573e-283	2.37942e-278	0.92	0.718	LMPP
NDUFS6	0.128342	6.1481e-282	1.63896e-277	0.787	0.564	LMPP
TRH	0.129624	3.67565e-281	9.79855e-277	0.178	0.042	LMPP
MCM5	0.216861	4.60374e-281	1.22727e-276	0.53	0.287	LMPP
MRPL11	0.169134	5.04758e-280	1.34558e-275	0.76	0.521	LMPP
HMGA1	0.21144	5.51313e-280	1.46969e-275	0.827	0.594	LMPP
PARVG	0.11505	7.74854e-280	2.06561e-275	0.452	0.248	LMPP
TMED9	0.197697	1.70218e-277	4.53768e-273	0.793	0.553	LMPP
PHB	0.108518	3.53041e-277	9.41136e-273	0.82	0.608	LMPP
MATK	0.177926	1.6863e-276	4.49535e-272	0.569	0.33	LMPP
CCT2	0.169246	1.88161e-276	5.01598e-272	0.901	0.693	LMPP
ETHE1	0.16491	3.13414e-275	8.35498e-271	0.584	0.347	LMPP
CD47	0.144743	8.13209e-275	2.16785e-270	0.575	0.345	LMPP
WDR54	0.158857	1.68698e-273	4.49715e-269	0.469	0.246	LMPP
FEN1	0.220235	3.63161e-273	9.68115e-269	0.442	0.214	LMPP
PA2G4	0.195159	7.57403e-273	2.01909e-268	0.896	0.687	LMPP
CDCA7L	0.158902	9.80911e-273	2.61491e-268	0.517	0.289	LMPP
HSPE1	0.181283	3.33602e-272	8.89317e-268	0.913	0.712	LMPP
RBX1	0.119317	2.11609e-271	5.64109e-267	0.88	0.677	LMPP
SSRP1	0.158385	2.12709e-271	5.67039e-267	0.629	0.396	LMPP
USP1	0.216644	3.37874e-271	9.00705e-267	0.605	0.36	LMPP
SNRPG	0.136089	8.36342e-271	2.22952e-266	0.829	0.611	LMPP
CARHSP1	0.176783	4.16792e-270	1.11108e-265	0.48	0.251	LMPP
PMAIP1	0.12787	1.24166e-269	3.31002e-265	0.415	0.214	LMPP
TUFM	0.220469	2.39584e-269	6.38682e-265	0.91	0.714	LMPP
SMC2	0.22111	3.91022e-269	1.04239e-264	0.552	0.312	LMPP
UBE2N	0.141371	5.31254e-269	1.41622e-264	0.688	0.458	LMPP
PSMD7	0.100532	7.88068e-269	2.10083e-264	0.708	0.497	LMPP
NDUFB3	0.125502	1.47856e-268	3.94154e-264	0.737	0.515	LMPP
AHCY	0.162729	1.66087e-268	4.42756e-264	0.632	0.397	LMPP
GGCT	0.169648	1.25576e-267	3.3476e-263	0.728	0.491	LMPP
APPL1	0.148536	7.06858e-267	1.88434e-262	0.608	0.38	LMPP
PSMA5	0.101825	7.30813e-267	1.9482e-262	0.773	0.564	LMPP
POLD2	0.193657	1.09253e-266	2.91246e-262	0.647	0.405	LMPP
HNRNPDL	0.220878	1.11855e-266	2.98182e-262	0.979	0.868	LMPP
CACYBP	0.107908	1.14715e-266	3.05807e-262	0.739	0.528	LMPP
FARSA	0.190847	1.31705e-266	3.51099e-262	0.59	0.349	LMPP
HSBP1	0.181286	3.22893e-266	8.60768e-262	0.824	0.596	LMPP
ERH	0.200722	3.70749e-266	9.88342e-262	0.946	0.776	LMPP
NUDC	0.100723	6.67713e-266	1.77999e-261	0.769	0.564	LMPP
NOP56	0.168629	4.27686e-265	1.14013e-260	0.766	0.536	LMPP
RBBP7	0.160335	9.49422e-265	2.53097e-260	0.697	0.464	LMPP
PSMB3	0.11738	1.89353e-264	5.04777e-260	0.831	0.623	LMPP
GTF3C6	0.117728	3.97728e-264	1.06026e-259	0.771	0.557	LMPP
P2RY8	0.116407	1.42248e-263	3.79204e-259	0.281	0.116	LMPP
PRDX4	0.196632	3.29281e-263	8.77797e-259	0.656	0.415	LMPP
SRP72	0.137276	4.60445e-263	1.22745e-258	0.798	0.58	LMPP
DDX39A	0.177811	7.50581e-263	2.0009e-258	0.566	0.332	LMPP
NAA20	0.160277	2.83997e-262	7.5708e-258	0.678	0.443	LMPP
BIRC5	0.326415	3.70052e-262	9.86485e-258	0.318	0.128	LMPP
HENMT1	0.173158	6.0011e-262	1.59977e-257	0.543	0.311	LMPP
COPE	0.101829	6.50291e-262	1.73355e-257	0.853	0.651	LMPP
UQCC2	0.124379	6.86577e-262	1.83028e-257	0.623	0.406	LMPP
NDUFA12	0.159899	7.49915e-262	1.99912e-257	0.784	0.557	LMPP
COX7B	0.141412	1.12186e-261	2.99065e-257	0.876	0.671	LMPP
MIR181A1HG	0.163351	2.25192e-261	6.00317e-257	0.387	0.182	LMPP
ILF2	0.164434	3.86774e-261	1.03106e-256	0.891	0.687	LMPP
EIF5A	0.139126	4.91192e-261	1.30942e-256	0.836	0.623	LMPP
ANXA1	0.109047	5.79558e-261	1.54499e-256	0.918	0.726	LMPP
NDUFB2	0.105558	1.26213e-259	3.36459e-255	0.797	0.59	LMPP
LCP1	0.10331	1.604e-259	4.27594e-255	0.67	0.448	LMPP
NOP58	0.124795	2.66525e-258	7.10503e-254	0.674	0.458	LMPP
PPIA	0.203883	3.36364e-258	8.96679e-254	0.999	0.964	LMPP
PSMB2	0.131492	6.81405e-258	1.81649e-253	0.75	0.532	LMPP
SNRPA1	0.142024	7.03167e-258	1.8745e-253	0.599	0.376	LMPP
SLC25A3	0.200165	5.31128e-257	1.41588e-252	0.99	0.924	LMPP
ASF1B	0.195397	1.42735e-256	3.80502e-252	0.278	0.1	LMPP
AKR1A1	0.196244	4.11877e-256	1.09798e-251	0.835	0.614	LMPP
C16orf74	0.119564	1.60025e-255	4.26594e-251	0.174	0.042	LMPP
ZWINT	0.205464	1.80832e-255	4.82062e-251	0.378	0.171	LMPP
TMEM106C	0.243733	3.11888e-255	8.31431e-251	0.488	0.259	LMPP
MIS18BP1	0.212504	2.02815e-254	5.40663e-250	0.689	0.45	LMPP
AGPAT2	0.108147	6.6131e-254	1.76292e-249	0.461	0.266	LMPP
CENPW	0.190036	8.63894e-254	2.30297e-249	0.484	0.26	LMPP
POLE3	0.149066	1.34222e-253	3.5781e-249	0.584	0.36	LMPP
HPRT1	0.135802	1.34793e-253	3.5933e-249	0.713	0.494	LMPP
PHPT1	0.152716	2.43741e-253	6.49765e-249	0.737	0.51	LMPP
MDH2	0.141676	7.54623e-253	2.01167e-248	0.875	0.674	LMPP
MZT2A	0.159325	1.00984e-252	2.69203e-248	0.72	0.49	LMPP
BSG	0.132867	1.10586e-252	2.94801e-248	0.753	0.536	LMPP
HMGB1	0.227176	2.72144e-251	7.25482e-247	0.999	0.977	LMPP
MCM3	0.239209	3.81949e-251	1.0182e-246	0.564	0.328	LMPP
SNRNP25	0.15823	6.79317e-250	1.81092e-245	0.513	0.293	LMPP
NUTF2	0.123691	2.15971e-249	5.75736e-245	0.704	0.49	LMPP
TOP1MT	0.106804	4.52438e-249	1.20611e-244	0.39	0.207	LMPP
MRPL3	0.129545	4.58416e-249	1.22205e-244	0.662	0.447	LMPP
PPIH	0.160353	9.21321e-249	2.45606e-244	0.556	0.332	LMPP
COPS3	0.100168	1.3731e-248	3.66041e-244	0.618	0.416	LMPP
HNRNPF	0.155326	2.341e-248	6.24063e-244	0.862	0.656	LMPP
ANAPC11	0.179105	4.00524e-248	1.06772e-243	0.772	0.545	LMPP
RPN2	0.112567	4.14424e-248	1.10477e-243	0.775	0.567	LMPP
GMNN	0.187703	4.69412e-248	1.25136e-243	0.438	0.222	LMPP
SNRPD3	0.109918	4.35713e-247	1.16152e-242	0.812	0.611	LMPP
AP2S1	0.155626	1.26952e-246	3.38428e-242	0.783	0.562	LMPP
SYNCRIP	0.107356	4.0832e-246	1.0885e-241	0.654	0.449	LMPP
EGFL7	0.113308	4.40515e-246	1.17433e-241	0.902	0.71	LMPP
AGTRAP	0.13892	4.59543e-246	1.22505e-241	0.378	0.182	LMPP
RUVBL2	0.149049	5.20094e-246	1.38647e-241	0.588	0.368	LMPP
HSP90AA1	0.219811	1.89172e-245	5.04295e-241	0.996	0.95	LMPP
SNRPE	0.183305	3.17381e-245	8.46075e-241	0.976	0.849	LMPP
MAP1A	0.107031	3.97682e-245	1.06014e-240	0.258	0.108	LMPP
UBE2I	0.114791	4.12357e-245	1.09926e-240	0.831	0.63	LMPP
DEK	0.229735	2.1282e-244	5.67335e-240	0.867	0.662	LMPP
TPI1	0.220194	2.62201e-244	6.98976e-240	0.96	0.829	LMPP
LSM5	0.158164	8.97195e-244	2.39174e-239	0.848	0.64	LMPP
PSMA3	0.13017	9.59728e-244	2.55844e-239	0.765	0.553	LMPP
LDHB	0.177014	1.21395e-243	3.23616e-239	0.999	0.975	LMPP
RAD51AP1	0.194119	1.26769e-243	3.37941e-239	0.321	0.133	LMPP
AURKAIP1	0.10997	1.419e-243	3.78278e-239	0.718	0.509	LMPP
YWHAQ	0.160363	1.76279e-243	4.69925e-239	0.866	0.662	LMPP
CKLF	0.149394	2.8686e-243	7.6471e-239	0.517	0.301	LMPP
NUSAP1	0.347398	1.1864e-242	3.16272e-238	0.367	0.17	LMPP
NDUFB11	0.111634	1.3964e-242	3.72253e-238	0.927	0.752	LMPP
POMP	0.116308	1.53231e-242	4.08482e-238	0.842	0.644	LMPP
SRSF10	0.122458	2.48865e-241	6.63423e-237	0.703	0.49	LMPP
EBNA1BP2	0.113618	3.18716e-241	8.49633e-237	0.605	0.401	LMPP
HNRNPR	0.110283	4.05317e-240	1.08049e-235	0.804	0.604	LMPP
EEF1E1	0.125444	8.50151e-240	2.26633e-235	0.594	0.384	LMPP
NUDT5	0.119952	2.4399e-239	6.50428e-235	0.605	0.394	LMPP
FDPS	0.123211	1.79298e-238	4.77972e-234	0.653	0.443	LMPP
UNG	0.240534	4.89806e-238	1.30572e-233	0.462	0.244	LMPP
RASGRP2	0.109927	3.20262e-237	8.53755e-233	0.522	0.32	LMPP
PRIM1	0.188677	1.30899e-236	3.48952e-232	0.48	0.261	LMPP
HADH	0.12111	1.20549e-235	3.21359e-231	0.547	0.343	LMPP
TXN	0.184355	3.45003e-235	9.19708e-231	0.985	0.889	LMPP
IMPA2	0.160434	1.26009e-234	3.35915e-230	0.4	0.199	LMPP
SIVA1	0.177859	1.13515e-233	3.02608e-229	0.781	0.562	LMPP
SRP9	0.176533	1.50809e-233	4.02028e-229	0.913	0.732	LMPP
EIF4EBP1	0.128491	2.23601e-232	5.96076e-228	0.688	0.478	LMPP
UQCRQ	0.114044	2.83348e-232	7.55348e-228	0.815	0.618	LMPP
CCT7	0.11833	3.20788e-231	8.55158e-227	0.826	0.629	LMPP
NUCKS1	0.237265	6.11221e-231	1.62939e-226	0.922	0.752	LMPP
UBE2C	0.449515	1.48195e-230	3.95058e-226	0.332	0.146	LMPP
XRCC6	0.13746	2.14925e-230	5.72948e-226	0.817	0.613	LMPP
HAUS1	0.151517	2.58754e-230	6.89787e-226	0.571	0.354	LMPP
MRPL12	0.125034	1.4198e-229	3.7849e-225	0.629	0.423	LMPP
PTTG1	0.367926	3.54704e-229	9.4557e-225	0.5	0.283	LMPP
MTF2	0.148731	7.69559e-229	2.05149e-224	0.656	0.436	LMPP
PHF19	0.172566	2.3814e-228	6.34834e-224	0.331	0.145	LMPP
MND1	0.171907	8.89334e-228	2.37079e-223	0.314	0.132	LMPP
CENPM	0.211025	9.30884e-228	2.48155e-223	0.358	0.165	LMPP
ARRB2	0.115728	1.24037e-227	3.30658e-223	0.405	0.22	LMPP
TWF2	0.112504	1.4234e-227	3.79451e-223	0.525	0.326	LMPP
PGK1	0.186814	6.10466e-226	1.62738e-221	0.901	0.718	LMPP
NDUFS8	0.104129	1.55293e-225	4.13979e-221	0.736	0.539	LMPP
SCCPDH	0.146049	2.04925e-225	5.46289e-221	0.715	0.501	LMPP
HMGN5	0.130708	2.09695e-225	5.59006e-221	0.485	0.286	LMPP
NPDC1	0.140213	2.27961e-224	6.07698e-220	0.301	0.137	LMPP
SMC3	0.11395	5.79527e-224	1.5449e-219	0.697	0.495	LMPP
MRPL51	0.120958	2.28181e-223	6.08285e-219	0.852	0.662	LMPP
CDKN3	0.276768	2.30168e-223	6.13581e-219	0.297	0.124	LMPP
HSPA8	0.2108	2.42084e-223	6.45349e-219	0.955	0.817	LMPP
AK2	0.143129	3.1816e-223	8.4815e-219	0.64	0.427	LMPP
ISYNA1	0.144401	7.48989e-223	1.99666e-218	0.487	0.283	LMPP
RHEB	0.144241	7.05809e-222	1.88154e-217	0.675	0.462	LMPP
COX8A	0.100253	7.32267e-222	1.95208e-217	0.873	0.692	LMPP
SRSF3	0.178973	1.53395e-221	4.0892e-217	0.985	0.895	LMPP
PARK7	0.172619	2.35898e-221	6.28856e-217	0.957	0.817	LMPP
GSTO1	0.14233	2.82582e-221	7.53308e-217	0.861	0.668	LMPP
PSMA4	0.142471	7.53718e-221	2.00926e-216	0.897	0.716	LMPP
NDUFC2	0.100301	8.49098e-221	2.26353e-216	0.75	0.556	LMPP
MRPL15	0.121201	2.01813e-220	5.37993e-216	0.557	0.356	LMPP
CENPN	0.18162	6.43403e-220	1.71518e-215	0.34	0.154	LMPP
ETFB	0.107606	2.38697e-219	6.36318e-215	0.716	0.517	LMPP
HSPB11	0.128607	4.55492e-219	1.21425e-214	0.633	0.426	LMPP
FIBP	0.134586	2.96727e-218	7.91014e-214	0.664	0.453	LMPP
NDUFV1	0.112583	3.53941e-218	9.43536e-214	0.68	0.478	LMPP
PSMC3	0.135188	3.80553e-218	1.01448e-213	0.616	0.41	LMPP
LSM3	0.152531	5.42375e-218	1.44586e-213	0.818	0.616	LMPP
MPG	0.118571	3.06013e-217	8.15769e-213	0.749	0.545	LMPP
PSMA7	0.125553	5.97579e-217	1.59303e-212	0.947	0.791	LMPP
NHP2	0.127858	1.99797e-216	5.32618e-212	0.881	0.699	LMPP
PHF5A	0.103181	2.80447e-216	7.47615e-212	0.562	0.368	LMPP
IAH1	0.100272	7.08148e-216	1.88778e-211	0.476	0.29	LMPP
CTSC	0.109758	1.03695e-215	2.76431e-211	0.622	0.419	LMPP
MAD2L2	0.145403	1.18097e-214	3.14822e-210	0.432	0.234	LMPP
CHCHD2	0.174793	2.0774e-214	5.53794e-210	0.995	0.948	LMPP
XRN2	0.126948	2.11112e-214	5.62782e-210	0.7	0.496	LMPP
MRPL57	0.152526	4.98615e-214	1.32921e-209	0.883	0.698	LMPP
BANF1	0.138041	7.68404e-213	2.04841e-208	0.817	0.62	LMPP
SNRPA	0.109022	1.59265e-212	4.24568e-208	0.617	0.419	LMPP
CHEK1	0.175456	1.92215e-212	5.12408e-208	0.359	0.171	LMPP
YWHAE	0.129841	2.55323e-212	6.80641e-208	0.874	0.691	LMPP
CBX5	0.128757	1.68502e-211	4.49192e-207	0.567	0.366	LMPP
YEATS4	0.156218	8.78876e-211	2.34291e-206	0.529	0.321	LMPP
SF3A3	0.105129	9.55348e-211	2.54677e-206	0.567	0.377	LMPP
SSBP1	0.152107	1.05685e-210	2.81735e-206	0.921	0.754	LMPP
RNASEH2C	0.116783	4.9244e-210	1.31275e-205	0.755	0.556	LMPP
PIK3R1	0.182856	4.60632e-209	1.22795e-204	0.463	0.26	LMPP
CAT	0.216367	7.88935e-209	2.10314e-204	0.916	0.754	LMPP
APLP2	0.18533	1.28931e-208	3.43704e-204	0.763	0.553	LMPP
TECR	0.117218	5.22687e-208	1.39338e-203	0.67	0.469	LMPP
RFC1	0.15888	1.02038e-207	2.72013e-203	0.541	0.333	LMPP
TOP2A	0.384429	1.74462e-205	4.6508e-201	0.302	0.132	LMPP
PPP1CA	0.111058	2.01738e-204	5.37793e-200	0.785	0.595	LMPP
CYC1	0.116983	2.21262e-203	5.8984e-199	0.607	0.415	LMPP
SET	0.142922	4.35898e-203	1.16202e-198	0.926	0.765	LMPP
DTYMK	0.166449	6.52867e-203	1.74041e-198	0.463	0.264	LMPP
SRSF2	0.19705	1.04835e-202	2.79469e-198	0.867	0.683	LMPP
CKS2	0.252603	1.47038e-202	3.91973e-198	0.723	0.512	LMPP
OSTC	0.114865	1.05136e-201	2.80271e-197	0.919	0.757	LMPP
ACAA2	0.115257	1.3023e-201	3.47167e-197	0.473	0.287	LMPP
DDOST	0.105026	1.89568e-201	5.05351e-197	0.704	0.511	LMPP
IFT57	0.104389	1.26186e-200	3.36387e-196	0.381	0.211	LMPP
AP3S1	0.106627	1.35208e-200	3.60437e-196	0.552	0.361	LMPP
TSPAN3	0.112486	3.28753e-200	8.76389e-196	0.466	0.283	LMPP
MRPS6	0.10466	3.72552e-200	9.93148e-196	0.58	0.391	LMPP
MT2A	0.148014	6.75265e-200	1.80012e-195	0.471	0.275	LMPP
CLSPN	0.169116	2.01319e-198	5.36677e-194	0.309	0.139	LMPP
EBP	0.13839	9.75227e-197	2.59976e-192	0.529	0.331	LMPP
HNRNPA3	0.154305	8.0842e-196	2.15509e-191	0.942	0.796	LMPP
GCSH	0.115122	2.10372e-195	5.6081e-191	0.536	0.351	LMPP
TRAPPC2L	0.108241	3.43989e-195	9.17005e-191	0.482	0.297	LMPP
RPL22L1	0.132785	2.82528e-194	7.53164e-190	0.947	0.803	LMPP
EIF4A1	0.115245	2.93018e-194	7.81126e-190	0.76	0.569	LMPP
NANS	0.100189	4.31116e-194	1.14927e-189	0.534	0.35	LMPP
PARP1	0.100517	7.92033e-194	2.1114e-189	0.815	0.636	LMPP
DPP7	0.132061	2.39205e-193	6.37674e-189	0.712	0.513	LMPP
SMARCB1	0.119287	3.20199e-193	8.53588e-189	0.613	0.419	LMPP
XBP1	0.119792	3.47752e-193	9.27037e-189	0.769	0.575	LMPP
H2AFY	0.154912	5.80134e-193	1.54652e-188	0.99	0.927	LMPP
DYNLL1	0.128641	4.52336e-192	1.20584e-187	0.946	0.803	LMPP
IGFBP7	0.355932	6.92774e-192	1.8468e-187	0.496	0.309	LMPP
COX6C	0.139416	2.01955e-190	5.38371e-186	0.96	0.83	LMPP
CSTB	0.104177	6.0465e-190	1.61188e-185	0.765	0.578	LMPP
NME4	0.120274	1.95358e-189	5.20785e-185	0.553	0.369	LMPP
PIGT	0.108282	3.78271e-189	1.00839e-184	0.43	0.254	LMPP
RFC4	0.157132	4.69755e-189	1.25227e-184	0.38	0.198	LMPP
GLA	0.116485	7.21451e-189	1.92324e-184	0.294	0.137	LMPP
MCM4	0.166024	1.22167e-188	3.25673e-184	0.37	0.191	LMPP
ID2	0.102467	4.51062e-187	1.20244e-182	0.43	0.257	LMPP
FAM216A	0.115774	2.96237e-186	7.89708e-182	0.426	0.25	LMPP
TUBB4B	0.336814	3.4085e-186	9.08638e-182	0.583	0.38	LMPP
H2AFV	0.105954	9.46598e-186	2.52344e-181	0.809	0.633	LMPP
IMPDH2	0.1497	1.15972e-185	3.09158e-181	0.951	0.819	LMPP
PRKDC	0.153745	2.11758e-185	5.64504e-181	0.609	0.415	LMPP
RUVBL1	0.103637	4.28222e-185	1.14155e-180	0.515	0.337	LMPP
PLIN3	0.144101	4.77597e-185	1.27318e-180	0.555	0.359	LMPP
APBB1IP	0.105609	6.84952e-184	1.82595e-179	0.476	0.297	LMPP
ORC6	0.149409	4.20226e-183	1.12024e-178	0.306	0.142	LMPP
LGALS3BP	0.1019	4.98016e-183	1.32761e-178	0.158	0.047	LMPP
UBE2T	0.171124	2.83912e-182	7.56852e-178	0.382	0.202	LMPP
NIT2	0.106899	3.61761e-182	9.64382e-178	0.516	0.334	LMPP
NCL	0.147902	4.95649e-182	1.3213e-177	0.954	0.823	LMPP
CDCA5	0.145198	1.0276e-181	2.73937e-177	0.225	0.087	LMPP
YBX1	0.145263	4.40719e-181	1.17487e-176	0.848	0.676	LMPP
YWHAB	0.113552	4.80129e-181	1.27993e-176	0.917	0.765	LMPP
NPM3	0.141639	5.08462e-181	1.35546e-176	0.633	0.438	LMPP
CENPK	0.144587	1.05356e-180	2.80858e-176	0.378	0.202	LMPP
CENPF	0.368805	1.07331e-179	2.86124e-175	0.403	0.221	LMPP
CENPU	0.155351	1.20259e-179	3.20587e-175	0.411	0.229	LMPP
PEBP1	0.154294	1.25046e-179	3.33347e-175	0.979	0.885	LMPP
MIS18A	0.122591	1.50065e-179	4.00044e-175	0.396	0.222	LMPP
PRSS2	0.148996	2.15103e-179	5.73423e-175	0.131	0.033	LMPP
PDIA6	0.113684	8.50944e-179	2.26845e-174	0.805	0.626	LMPP
MZT2B	0.155312	2.38111e-178	6.34756e-174	0.828	0.647	LMPP
MKI67	0.273599	3.29251e-178	8.77718e-174	0.28	0.125	LMPP
MRPL36	0.107282	1.48363e-177	3.95506e-173	0.511	0.332	LMPP
PTGES3	0.138258	9.15006e-176	2.43922e-171	0.945	0.81	LMPP
RRM1	0.162986	5.77104e-175	1.53845e-170	0.395	0.217	LMPP
HNRNPA2B1	0.19388	6.33237e-175	1.68808e-170	0.983	0.925	LMPP
SMC1A	0.107041	6.70696e-175	1.78794e-170	0.43	0.261	LMPP
AURKB	0.205111	8.9362e-175	2.38221e-170	0.233	0.094	LMPP
CCDC34	0.122132	1.15914e-174	3.09003e-170	0.458	0.28	LMPP
PGLS	0.123061	3.57114e-174	9.51995e-170	0.782	0.599	LMPP
TEX30	0.123874	2.12979e-173	5.6776e-169	0.413	0.239	LMPP
VKORC1	0.109367	1.14963e-172	3.06469e-168	0.56	0.378	LMPP
TM7SF3	0.164377	3.78053e-172	1.00781e-167	0.466	0.28	LMPP
HIST1H4C	0.478466	3.47172e-171	9.25492e-167	0.688	0.5	LMPP
B2M	0.1093	8.67049e-171	2.31138e-166	1	1	LMPP
SHMT2	0.110163	8.99481e-171	2.39784e-166	0.435	0.264	LMPP
NCOA4	0.119096	4.21543e-170	1.12375e-165	0.553	0.371	LMPP
GPX7	0.102625	2.86032e-169	7.62503e-165	0.388	0.226	LMPP
CDK1	0.173337	2.21723e-168	5.9107e-164	0.252	0.109	LMPP
APEX1	0.14129	5.14878e-168	1.37256e-163	0.948	0.82	LMPP
HMGB3	0.169955	1.29262e-167	3.44587e-163	0.452	0.269	LMPP
NUP214	0.108098	3.02925e-167	8.07538e-163	0.326	0.172	LMPP
SFPQ	0.106022	1.26453e-166	3.37098e-162	0.707	0.533	LMPP
SRSF7	0.118956	2.2409e-166	5.9738e-162	0.926	0.784	LMPP
FUS	0.141583	4.19578e-165	1.11851e-160	0.917	0.771	LMPP
ARMH1	0.295463	4.67658e-165	1.24668e-160	0.347	0.191	LMPP
HIRIP3	0.120927	2.04271e-164	5.44545e-160	0.337	0.177	LMPP
TMPO	0.111641	2.22209e-163	5.92365e-159	0.53	0.355	LMPP
MXD3	0.138017	2.98878e-163	7.9675e-159	0.191	0.07	LMPP
PTMA	0.102191	3.84898e-163	1.02606e-158	1	1	LMPP
LIG1	0.141628	6.33926e-163	1.68992e-158	0.277	0.128	LMPP
SPI1	0.118572	1.36821e-162	3.64737e-158	0.281	0.142	LMPP
HLA-A	0.180925	5.07187e-161	1.35206e-156	0.983	0.943	LMPP
OSM	0.157677	5.64828e-160	1.50572e-155	0.199	0.076	LMPP
ATAD5	0.143048	1.39849e-159	3.7281e-155	0.344	0.183	LMPP
BUB3	0.116347	2.21195e-159	5.89662e-155	0.583	0.408	LMPP
BRCA1	0.1451	2.30231e-159	6.13751e-155	0.301	0.148	LMPP
MCM2	0.138429	3.34662e-159	8.92143e-155	0.337	0.176	LMPP
FAM111A	0.118402	2.43205e-158	6.48335e-154	0.423	0.257	LMPP
TOR3A	0.100091	7.36476e-158	1.9633e-153	0.302	0.157	LMPP
TMEM97	0.139532	1.58578e-157	4.22737e-153	0.358	0.194	LMPP
SMC4	0.188586	4.15062e-157	1.10647e-152	0.591	0.403	LMPP
CDT1	0.146506	1.43779e-156	3.83287e-152	0.304	0.151	LMPP
SLC29A1	0.118439	1.84339e-155	4.9141e-151	0.26	0.119	LMPP
C1orf186	0.133587	1.15872e-153	3.08891e-149	0.187	0.074	LMPP
RNASEH2A	0.153033	1.78134e-152	4.7487e-148	0.305	0.155	LMPP
MCM6	0.134635	8.43199e-152	2.2478e-147	0.365	0.205	LMPP
PRDX1	0.151269	1.2471e-151	3.32452e-147	0.984	0.918	LMPP
HMGN1	0.144085	1.02055e-150	2.72057e-146	0.964	0.862	LMPP
CCNB2	0.226443	7.85754e-149	2.09466e-144	0.271	0.132	LMPP
CXCR4	0.158297	1.66985e-148	4.45149e-144	0.743	0.568	LMPP
PSME1	0.14305	6.22865e-148	1.66043e-143	0.968	0.881	LMPP
KIT	0.106411	1.06762e-146	2.84606e-142	0.3	0.16	LMPP
GNPTAB	0.111613	6.10008e-145	1.62616e-140	0.323	0.178	LMPP
SRD5A3	0.105422	5.83718e-144	1.55607e-139	0.323	0.176	LMPP
RFC2	0.110667	7.04254e-144	1.8774e-139	0.377	0.222	LMPP
KIF22	0.106162	1.34915e-142	3.59656e-138	0.375	0.224	LMPP
SPC25	0.118094	7.03741e-142	1.87603e-137	0.188	0.074	LMPP
WDR34	0.13178	8.81083e-141	2.34879e-136	0.302	0.156	LMPP
TKT	0.150615	1.08733e-140	2.89861e-136	0.948	0.839	LMPP
CDCA4	0.123686	1.8142e-139	4.83628e-135	0.333	0.184	LMPP
MSH6	0.138316	2.10365e-139	5.60791e-135	0.395	0.236	LMPP
CDC45	0.112081	4.33381e-138	1.15531e-133	0.213	0.092	LMPP
MT-CO2	0.120911	1.12963e-133	3.01137e-129	1	1	LMPP
NUF2	0.135877	3.84945e-133	1.02619e-128	0.203	0.087	LMPP
ASPM	0.228787	1.59083e-132	4.24084e-128	0.222	0.101	LMPP
CCNA2	0.147626	1.66543e-131	4.43971e-127	0.199	0.085	LMPP
HNRNPA1	0.14511	1.86672e-131	4.97629e-127	1	0.986	LMPP
ATAD2	0.114735	1.70582e-130	4.54737e-126	0.291	0.155	LMPP
MTHFD1	0.111518	2.00817e-127	5.35338e-123	0.336	0.194	LMPP
RAMP1	0.116126	3.10167e-127	8.26844e-123	0.251	0.134	LMPP
NDC80	0.125139	7.84979e-127	2.0926e-122	0.191	0.081	LMPP
TPX2	0.191752	3.30893e-126	8.82096e-122	0.266	0.136	LMPP
PM20D2	0.101356	2.05278e-124	5.4723e-120	0.325	0.188	LMPP
RFC5	0.10371	4.09687e-124	1.09214e-119	0.266	0.138	LMPP
BRCA2	0.126427	6.24326e-124	1.66433e-119	0.262	0.134	LMPP
ARPC3	0.106174	1.08043e-123	2.88022e-119	0.988	0.93	LMPP
EZH2	0.102695	8.06724e-123	2.15057e-118	0.309	0.174	LMPP
CLEC11A	0.20796	3.71779e-122	9.91089e-118	0.497	0.333	LMPP
PFN1	0.109605	1.7174e-119	4.57825e-115	0.987	0.927	LMPP
GTSE1	0.116099	1.68914e-118	4.50291e-114	0.17	0.07	LMPP
ATP5J2	0.135276	2.21565e-118	5.90648e-114	0.487	0.338	LMPP
ATP5G3	0.238144	1.14012e-117	3.03934e-113	0.592	0.503	LMPP
SLC25A6	0.130804	9.35129e-117	2.49287e-112	0.996	0.97	LMPP
RRM2	0.108865	3.41034e-115	9.09129e-111	0.195	0.088	LMPP
CDCA8	0.1165	1.35507e-113	3.61235e-109	0.174	0.075	LMPP
KIF15	0.106232	6.75808e-113	1.80157e-108	0.171	0.072	LMPP
CCNB1	0.211178	9.77248e-113	2.60515e-108	0.246	0.129	LMPP
LMNB1	0.116347	2.95063e-112	7.8658e-108	0.299	0.169	LMPP
KIF20B	0.129378	2.1975e-109	5.85809e-105	0.338	0.203	LMPP
RPS21	0.107738	2.92074e-109	7.78612e-105	1	0.997	LMPP
HN1	0.12594	6.40267e-109	1.70682e-104	0.342	0.213	LMPP
ATP5G1	0.156531	8.74976e-107	2.33251e-102	0.511	0.362	LMPP
CKAP2	0.138862	7.69772e-105	2.05206e-100	0.431	0.287	LMPP
PSIP1	0.118468	1.16483e-104	3.10521e-100	0.547	0.404	LMPP
RFLNB	0.11727	5.65599e-104	1.50777e-99	0.28	0.162	LMPP
CDCA3	0.114077	8.38025e-104	2.23401e-99	0.157	0.066	LMPP
NPW	0.161282	2.78946e-102	7.43613e-98	0.23	0.119	LMPP
CDC20	0.172426	1.06505e-99	2.83921e-95	0.176	0.082	LMPP
KPNA2	0.137766	2.86145e-87	7.62806e-83	0.325	0.203	LMPP
C1QBP	0.132388	2.13491e-83	5.69125e-79	0.512	0.382	LMPP
CENPE	0.132471	9.69573e-78	2.58469e-73	0.171	0.086	LMPP
ATP5F1	0.105799	7.71929e-77	2.05781e-72	0.537	0.417	LMPP
PCLAF	0.214139	1.47591e-75	3.93447e-71	0.283	0.175	LMPP
SHFM1	0.125937	5.36248e-63	1.42953e-58	0.529	0.411	LMPP
HMMR	0.152272	6.13833e-61	1.63636e-56	0.161	0.089	LMPP
ARL6IP1	0.124118	1.47849e-57	3.94135e-53	0.498	0.391	LMPP
SRSF9	0.100498	5.11519e-54	1.36361e-49	0.471	0.369	LMPP
ATP5B	0.152937	1.92166e-41	5.12275e-37	0.576	0.491	LMPP
ATP5C1	0.125188	6.46056e-41	1.72226e-36	0.573	0.477	LMPP
BEX3	0.109949	1.94107e-35	5.1745e-31	0.336	0.255	LMPP
ALDOA	0.138604	2.34197e-31	6.24321e-27	0.64	0.592	LMPP
FAM30A	0.1381	3.36773e-22	8.97769e-18	0.32	0.268	LMPP
ATP5MC3	0.12004	1.6136e-20	4.30153e-16	0.385	0.334	LMPP
HIST1H1B	0.118212	4.50468e-20	1.20086e-15	0.125	0.086	LMPP
KIAA0125	0.109141	1.92599e-14	5.1343e-10	0.498	0.445	LMPP
LYZ	3.15047	0	0	0.973	0.251	GMP
MPO	2.35224	0	0	0.998	0.238	GMP
PRTN3	2.03366	0	0	0.698	0.119	GMP
LGALS1	2.0034	0	0	0.983	0.21	GMP
CFD	1.60057	0	0	0.784	0.138	GMP
AZU1	1.48958	0	0	0.797	0.125	GMP
PLAC8	1.15393	0	0	0.994	0.674	GMP
CYBA	1.10739	0	0	0.997	0.8	GMP
CTSG	1.082	0	0	0.854	0.165	GMP
CSTA	1.0584	0	0	0.755	0.053	GMP
C1QTNF4	1.04243	0	0	0.651	0.135	GMP
IRF8	0.973983	0	0	0.806	0.065	GMP
MNDA	0.958662	0	0	0.584	0.033	GMP
RNASE2	0.949403	0	0	0.887	0.139	GMP
ANXA2	0.937148	0	0	0.746	0.119	GMP
HCST	0.89146	0	0	0.875	0.297	GMP
SAMHD1	0.888061	0	0	0.613	0.037	GMP
CEBPD	0.846907	0	0	0.633	0.034	GMP
TNFSF13B	0.824944	0	0	0.884	0.319	GMP
CXorf21	0.823647	0	0	0.756	0.149	GMP
TYROBP	0.780616	0	0	0.712	0.153	GMP
MS4A6A	0.754688	0	0	0.379	0.013	GMP
TMSB10	0.742861	0	0	1	0.987	GMP
PLD4	0.711594	0	0	0.714	0.119	GMP
KCNE5	0.697872	0	0	0.573	0.031	GMP
SERPINB8	0.696677	0	0	0.633	0.049	GMP
MS4A3	0.648112	0	0	0.683	0.11	GMP
FAM107B	0.615868	0	0	0.555	0.051	GMP
NKG7	0.592436	0	0	0.631	0.093	GMP
LY86	0.562709	0	0	0.49	0.019	GMP
IGSF6	0.541241	0	0	0.387	0.009	GMP
CSF1R	0.377766	0	0	0.379	0.01	GMP
PYCARD	0.698395	0	0	0.964	0.632	GMP
PPIB	0.728824	0	1.90423e-307	0.977	0.757	GMP
C20orf27	0.676838	0	3.05133e-306	0.86	0.373	GMP
SPNS3	0.600823	5.53963e-295	1.47675e-290	0.716	0.164	GMP
F13A1	0.392402	3.67089e-293	9.78586e-289	0.34	0.016	GMP
HSP90B1	0.807139	2.81819e-287	7.51273e-283	0.946	0.659	GMP
ELANE	1.12418	1.00474e-286	2.67842e-282	0.626	0.116	GMP
COTL1	0.638607	1.88144e-286	5.01554e-282	0.645	0.153	GMP
MRPL33	0.651728	7.64397e-278	2.03773e-273	0.861	0.425	GMP
LYST	0.573407	2.78719e-277	7.43008e-273	0.582	0.107	GMP
TSPO	0.612496	8.97547e-277	2.39268e-272	0.984	0.803	GMP
HRH2	0.378384	4.00916e-273	1.06876e-268	0.351	0.021	GMP
GSTP1	0.597323	6.83112e-272	1.82104e-267	0.998	0.957	GMP
CLEC11A	1.00123	2.93662e-268	7.82845e-264	0.687	0.349	GMP
FABP5	0.716555	1.55195e-264	4.13719e-260	0.959	0.625	GMP
CLEC12A	0.493215	1.56884e-261	4.18221e-257	0.542	0.087	GMP
SRGN	0.888194	1.11311e-246	2.96732e-242	0.995	0.918	GMP
TMSB4X	0.718487	3.56401e-246	9.50093e-242	1	0.995	GMP
LCP1	0.681629	1.78352e-243	4.75452e-239	0.875	0.47	GMP
RAB32	0.642149	6.7616e-236	1.80251e-231	0.797	0.296	GMP
KIAA0930	0.471154	1.82435e-234	4.86334e-230	0.538	0.102	GMP
IL6R	0.46115	3.65418e-231	9.74131e-227	0.502	0.084	GMP
CD48	0.451015	6.3888e-227	1.70313e-222	0.613	0.145	GMP
NAIP	0.401185	1.85721e-223	4.95095e-219	0.418	0.054	GMP
DBI	0.627856	2.00672e-223	5.34953e-219	0.916	0.56	GMP
CALR	0.70143	3.1241e-221	8.32823e-217	0.972	0.779	GMP
PSME2	0.57873	5.93981e-220	1.58344e-215	0.934	0.68	GMP
SERF2	0.469242	6.97004e-212	1.85807e-207	0.998	0.972	GMP
GRN	0.588384	1.57807e-211	4.20682e-207	0.769	0.32	GMP
MGST1	0.632989	1.09464e-208	2.9181e-204	0.928	0.548	GMP
GPX1	0.132495	1.11607e-208	2.97522e-204	0.284	0.558	GMP
RNASET2	0.622842	2.323e-206	6.19264e-202	0.821	0.367	GMP
PRSS57	0.579888	1.90929e-203	5.08977e-199	0.988	0.833	GMP
FLNA	0.524423	2.46189e-200	6.5629e-196	0.657	0.214	GMP
PLPPR3	0.339345	9.56204e-200	2.54905e-195	0.287	0.021	GMP
ITGB2	0.512789	3.22831e-198	8.60603e-194	0.652	0.204	GMP
RBM47	0.227926	1.49261e-197	3.97899e-193	0.234	0.01	GMP
SSR4	0.507275	5.71282e-197	1.52292e-192	0.983	0.842	GMP
CORO1A	0.65018	8.83328e-197	2.35478e-192	0.882	0.484	GMP
VAMP8	0.490404	4.65707e-192	1.24148e-187	0.994	0.91	GMP
CD180	0.245965	9.61918e-190	2.56428e-185	0.262	0.017	GMP
HNRNPU	0.674484	2.32433e-187	6.1962e-183	0.937	0.635	GMP
IL17RA	0.34864	1.27273e-185	3.39284e-181	0.391	0.058	GMP
TIFAB	0.217166	1.89584e-185	5.05394e-181	0.221	0.01	GMP
P4HB	0.579859	4.07816e-184	1.08716e-179	0.894	0.516	GMP
SPI1	0.486474	8.94579e-184	2.38477e-179	0.571	0.152	GMP
FCER1G	0.509392	4.65537e-180	1.24103e-175	0.513	0.119	GMP
CCR2	0.199018	6.42821e-179	1.71363e-174	0.194	0.007	GMP
RACK1	0.347546	2.74181e-173	7.30911e-169	0.713	0.374	GMP
MYL6	0.43298	1.42569e-172	3.8006e-168	0.997	0.935	GMP
EMB	0.492366	1.29977e-171	3.46493e-167	0.676	0.243	GMP
RETN	0.390935	3.2801e-169	8.7441e-165	0.172	0.004	GMP
RNASE6	0.351218	6.30662e-169	1.68122e-164	0.406	0.074	GMP
BCL2	0.437067	3.96275e-167	1.05639e-162	0.483	0.113	GMP
HGF	0.334262	2.14719e-166	5.72398e-162	0.355	0.052	GMP
IGFBP7	0.669604	2.21648e-166	5.90869e-162	0.725	0.326	GMP
ACTG1	0.432307	7.8302e-165	2.08738e-160	1	0.997	GMP
PKM	0.525464	1.19519e-164	3.18613e-160	0.915	0.565	GMP
S100A9	1.55757	1.46082e-163	3.89425e-159	0.205	0.01	GMP
ARPC2	0.444009	1.14085e-162	3.04127e-158	0.984	0.877	GMP
YBX1	0.623569	5.11973e-161	1.36482e-156	0.967	0.694	GMP
KBTBD11	0.292893	5.71188e-161	1.52267e-156	0.336	0.047	GMP
SUCNR1	0.359823	4.83795e-160	1.2897e-155	0.342	0.051	GMP
RUNX1	0.553265	2.20141e-159	5.86851e-155	0.757	0.368	GMP
GOLGA8N	0.316263	6.9695e-159	1.85793e-154	0.323	0.045	GMP
RNASE3	0.249949	2.61948e-158	6.983e-154	0.327	0.051	GMP
CD33	0.34727	4.44588e-158	1.18518e-153	0.506	0.132	GMP
FCGRT	0.522483	6.74649e-158	1.79848e-153	0.732	0.326	GMP
LILRB4	0.200308	5.53747e-157	1.47618e-152	0.221	0.018	GMP
FLT3	0.444525	1.32506e-156	3.53234e-152	0.62	0.208	GMP
C1QBP	0.628511	1.54548e-156	4.11994e-152	0.796	0.391	GMP
ZEB2	0.623444	6.59294e-156	1.75755e-151	0.839	0.507	GMP
BRI3BP	0.393393	1.39741e-155	3.72522e-151	0.496	0.135	GMP
MTDH	0.567038	1.50155e-155	4.00283e-151	0.9	0.612	GMP
SCPEP1	0.334505	2.29633e-155	6.12156e-151	0.421	0.088	GMP
SERPINB10	0.25882	9.5218e-155	2.53832e-150	0.232	0.018	GMP
ATP5F1E	0.760266	1.82662e-153	4.8694e-149	0.705	0.349	GMP
PRAM1	0.379499	2.91575e-153	7.7728e-149	0.56	0.17	GMP
C16orf74	0.311814	3.91513e-152	1.0437e-147	0.343	0.055	GMP
MEF2D	0.299085	1.09742e-150	2.92549e-146	0.377	0.07	GMP
AP2S1	0.477739	2.59637e-149	6.92139e-145	0.886	0.587	GMP
HLA-DMB	0.367136	6.09936e-148	1.62597e-143	0.571	0.186	GMP
UNC93B1	0.281751	3.95646e-147	1.05471e-142	0.307	0.042	GMP
SLC2A4RG	0.303859	4.94689e-144	1.31874e-139	0.413	0.09	GMP
CRYBG1	0.266199	2.55241e-142	6.80422e-138	0.29	0.039	GMP
PARVG	0.42204	7.49211e-142	1.99725e-137	0.67	0.268	GMP
OTULINL	0.234497	2.26636e-141	6.04166e-137	0.242	0.024	GMP
RFLNB	0.484502	2.52863e-141	6.74083e-137	0.544	0.17	GMP
FOSL2	0.346436	4.3467e-141	1.15874e-136	0.39	0.081	GMP
UHRF1	0.365487	5.04115e-141	1.34387e-136	0.515	0.151	GMP
PIK3AP1	0.257386	1.64241e-140	4.37834e-136	0.363	0.071	GMP
NREP	0.486707	1.41966e-139	3.78454e-135	0.766	0.399	GMP
H2AFZ	0.53871	2.46082e-139	6.56005e-135	0.978	0.82	GMP
RAB31	0.261782	3.35275e-138	8.93776e-134	0.216	0.018	GMP
ADRB2	0.196103	6.12097e-138	1.63173e-133	0.212	0.017	GMP
CEBPA	0.294085	2.18733e-137	5.83098e-133	0.362	0.07	GMP
MLEC	0.503647	3.49483e-137	9.31653e-133	0.695	0.306	GMP
NT5DC2	0.271534	3.8369e-137	1.02284e-132	0.33	0.058	GMP
SEC61B	0.427636	1.29725e-136	3.45821e-132	0.972	0.777	GMP
RPLP1	0.196098	1.37006e-136	3.65232e-132	1	1	GMP
CD302	0.350321	7.57568e-134	2.01952e-129	0.512	0.156	GMP
RASSF4	0.152071	2.17712e-132	5.80377e-128	0.145	0.005	GMP
BAHCC1	0.280263	4.10786e-132	1.09507e-127	0.349	0.067	GMP
ACTR2	0.510227	1.06102e-131	2.82846e-127	0.824	0.482	GMP
CTSZ	0.333746	3.89839e-131	1.03923e-126	0.428	0.108	GMP
SLC8A1	0.138053	3.98835e-131	1.06321e-126	0.127	0.003	GMP
NUP214	0.378048	5.19107e-131	1.38384e-126	0.549	0.186	GMP
S100A11	0.439542	3.33735e-130	8.89671e-126	0.58	0.207	GMP
TLR2	0.187953	1.45041e-128	3.8665e-124	0.206	0.017	GMP
TRG-AS1	0.220322	5.13879e-128	1.3699e-123	0.259	0.034	GMP
AC020656.1	0.189628	8.98728e-127	2.39583e-122	0.129	0.003	GMP
PGLS	0.4521	1.86203e-126	4.9638e-122	0.891	0.619	GMP
MTMR11	0.135838	2.80435e-125	7.47584e-121	0.121	0.002	GMP
COLGALT1	0.302625	3.452e-125	9.20234e-121	0.422	0.111	GMP
SYK	0.415005	9.76467e-125	2.60306e-120	0.645	0.269	GMP
EMILIN2	0.301686	9.66106e-124	2.57545e-119	0.353	0.075	GMP
GNAI2	0.497543	1.32761e-123	3.53915e-119	0.787	0.452	GMP
MARC1	0.224383	2.25916e-123	6.02247e-119	0.219	0.022	GMP
ATP5MC1	0.530428	1.48084e-120	3.94761e-116	0.614	0.251	GMP
RASGRP2	0.416146	4.30518e-120	1.14767e-115	0.707	0.34	GMP
SH3KBP1	0.361449	7.38733e-120	1.96932e-115	0.549	0.196	GMP
RPS6KA4	0.24538	1.62076e-119	4.32062e-115	0.364	0.084	GMP
METTL26	0.45827	5.01091e-119	1.33581e-114	0.591	0.232	GMP
PTMA	0.264136	1.29086e-118	3.44118e-114	1	1	GMP
CFL1	0.368128	1.81019e-118	4.82561e-114	0.992	0.948	GMP
ATP5MC3	0.63448	2.24884e-118	5.99497e-114	0.686	0.333	GMP
TSPOAP1	0.225262	3.04174e-118	8.10866e-114	0.216	0.023	GMP
FUT4	0.231921	2.58782e-117	6.89862e-113	0.257	0.037	GMP
PHPT1	0.42497	7.84151e-117	2.09039e-112	0.855	0.535	GMP
SRSF9	0.486132	1.11513e-116	2.97271e-112	0.742	0.375	GMP
SPECC1	0.330628	1.9614e-116	5.2287e-112	0.447	0.133	GMP
CANX	0.467363	2.21518e-116	5.90524e-112	0.871	0.563	GMP
HLA-B	0.359477	1.84179e-115	4.90985e-111	0.997	0.981	GMP
PPIA	0.361021	2.20344e-115	5.87394e-111	0.998	0.968	GMP
MPEG1	0.166819	7.93966e-115	2.11656e-110	0.177	0.016	GMP
IL13RA1	0.136794	8.48028e-115	2.26067e-110	0.145	0.007	GMP
ATP5MF	0.475956	1.47292e-114	3.92652e-110	0.579	0.231	GMP
LMNB1	0.380943	1.82285e-114	4.85936e-110	0.512	0.18	GMP
MGST3	0.402102	3.93792e-114	1.04977e-109	0.842	0.511	GMP
PLEK	0.158401	5.84195e-114	1.55735e-109	0.756	0.394	GMP
ERP29	0.373101	7.28713e-114	1.9426e-109	0.958	0.843	GMP
PSMA7	0.38525	7.75515e-114	2.06737e-109	0.971	0.81	GMP
ST14	0.130647	2.47564e-113	6.59957e-109	0.148	0.008	GMP
AL355922.1	0.20013	1.74968e-112	4.66431e-108	0.183	0.016	GMP
LRRC8C	0.205553	1.93235e-112	5.15125e-108	0.256	0.039	GMP
YWHAB	0.390326	3.18688e-112	8.49558e-108	0.948	0.783	GMP
FYB1	0.255826	3.47509e-112	9.26389e-108	0.323	0.069	GMP
AC084033.3	0.427217	4.24663e-112	1.13207e-107	0.66	0.3	GMP
TENT5A	0.347658	4.80759e-112	1.28161e-107	0.43	0.125	GMP
TXNL4A	0.390243	1.14761e-111	3.05929e-107	0.674	0.314	GMP
C4orf48	0.315761	1.1708e-111	3.12113e-107	0.352	0.083	GMP
TESC	0.297624	3.85895e-111	1.02872e-106	0.39	0.107	GMP
TMED10	0.38219	2.40192e-110	6.40303e-106	0.786	0.438	GMP
TMEM160	0.408501	5.05062e-110	1.34639e-105	0.59	0.243	GMP
PDE7A	0.317159	5.26307e-110	1.40303e-105	0.492	0.167	GMP
ATP5MPL	0.478347	7.01728e-110	1.87067e-105	0.659	0.298	GMP
CST7	0.415561	3.53892e-109	9.43406e-105	0.413	0.118	GMP
SEM1	0.482189	7.02184e-109	1.87188e-104	0.626	0.278	GMP
CD93	0.155574	1.86877e-108	4.98176e-104	0.17	0.013	GMP
GGA2	0.266064	1.7828e-107	4.75258e-103	0.35	0.086	GMP
AFF3	0.279188	4.57938e-107	1.22077e-102	0.406	0.116	GMP
PPM1G	0.436186	6.13605e-107	1.63575e-102	0.756	0.432	GMP
ATP5F1D	0.536735	7.19996e-107	1.91936e-102	0.658	0.313	GMP
GRK2	0.311426	2.16544e-106	5.77262e-102	0.409	0.118	GMP
NDUFB2	0.413451	2.52099e-106	6.72046e-102	0.878	0.613	GMP
S100A8	1.16586	7.77439e-106	2.0725e-101	0.14	0.008	GMP
ACTB	0.361357	1.10408e-105	2.94327e-101	1	0.992	GMP
VIM	0.385455	2.99435e-105	7.98233e-101	0.996	0.929	GMP
ARHGAP45	0.260325	4.3019e-105	1.1468e-100	0.326	0.074	GMP
ATP5PD	0.455745	6.22184e-105	1.65862e-100	0.61	0.265	GMP
ELOB	0.470389	1.54455e-104	4.11747e-100	0.633	0.285	GMP
ATP5MG	0.565479	4.14219e-104	1.10423e-99	0.704	0.358	GMP
PCLAF	0.359616	7.66246e-104	2.04266e-99	0.49	0.183	GMP
EFHD2	0.314032	6.04786e-103	1.61224e-98	0.435	0.141	GMP
IQGAP1	0.344228	2.81391e-102	7.50131e-98	0.484	0.173	GMP
GNAS	0.425629	1.1119e-101	2.96411e-97	0.85	0.562	GMP
BLNK	0.112604	1.72018e-101	4.58564e-97	0.21	0.042	GMP
DAPP1	0.225057	1.94232e-101	5.17783e-97	0.336	0.085	GMP
NUDT1	0.405631	3.46006e-101	9.22383e-97	0.806	0.496	GMP
ZYX	0.281712	1.31554e-100	3.50696e-96	0.528	0.208	GMP
ATP5F1B	0.460077	2.3718e-100	6.32274e-96	0.663	0.315	GMP
FNDC3B	0.267349	3.88433e-100	1.03549e-95	0.352	0.091	GMP
MIS18BP1	0.450291	7.55504e-100	2.01402e-95	0.781	0.477	GMP
BASP1	0.274398	2.38002e-99	6.34466e-95	0.377	0.106	GMP
C12orf75	0.274307	2.55901e-99	6.82182e-95	0.448	0.151	GMP
TYMP	0.237802	3.02309e-99	8.05895e-95	0.229	0.035	GMP
ATP5F1A	0.505623	3.14878e-99	8.39401e-95	0.672	0.329	GMP
ATP8B4	0.283732	3.16e-99	8.42393e-95	0.503	0.192	GMP
HLX	0.16844	4.0244e-99	1.07283e-94	0.227	0.038	GMP
ODF3B	0.153747	4.3209e-99	1.15186e-94	0.17	0.018	GMP
ARMH1	0.349986	9.36322e-99	2.49605e-94	0.523	0.206	GMP
CCL23	0.167899	1.77394e-98	4.72897e-94	0.187	0.021	GMP
ATP5MC2	0.598773	2.01577e-98	5.37364e-94	0.712	0.371	GMP
POU2F2	0.256205	4.21217e-98	1.12288e-93	0.435	0.152	GMP
KCTD12	0.171968	4.72004e-98	1.25827e-93	0.176	0.019	GMP
ST3GAL6	0.217198	7.78126e-98	2.07433e-93	0.297	0.066	GMP
RUNX2	0.186708	2.24381e-97	5.98156e-93	0.364	0.11	GMP
KIF17	0.143409	2.43311e-97	6.48619e-93	0.165	0.016	GMP
NRG4	0.138613	2.98582e-97	7.95961e-93	0.168	0.016	GMP
TFEC	0.300742	7.90081e-97	2.1062e-92	0.511	0.198	GMP
MYDGF	0.402715	8.47669e-97	2.25972e-92	0.817	0.528	GMP
SDF2L1	0.37221	8.75439e-97	2.33375e-92	0.616	0.282	GMP
APAF1	0.220186	6.4012e-96	1.70643e-91	0.292	0.064	GMP
MYO1F	0.302129	9.90145e-96	2.63953e-91	0.467	0.166	GMP
CITED4	0.139657	2.88318e-95	7.68597e-91	0.144	0.01	GMP
NDUFAF8	0.3402	5.5981e-95	1.49234e-90	0.508	0.196	GMP
SLC1A3	0.145379	1.37818e-94	3.67395e-90	0.168	0.017	GMP
SYNGR1	0.311304	1.46213e-94	3.89775e-90	0.734	0.394	GMP
HLA-C	0.327279	1.64742e-94	4.3917e-90	0.996	0.962	GMP
REEP5	0.285416	6.45848e-94	1.7217e-89	0.46	0.165	GMP
MCM4	0.38114	1.35165e-93	3.60323e-89	0.508	0.21	GMP
SELENOH	0.363695	1.79557e-93	4.78662e-89	0.633	0.306	GMP
BLOC1S1	0.346023	3.56075e-93	9.49225e-89	0.718	0.388	GMP
SYNCRIP	0.378888	4.09537e-93	1.09174e-88	0.787	0.471	GMP
ATP5PF	0.489592	9.32821e-93	2.48671e-88	0.662	0.331	GMP
FGL2	0.204721	9.42234e-93	2.51181e-88	0.191	0.025	GMP
COX8A	0.36785	1.07666e-92	2.87016e-88	0.925	0.713	GMP
HMGN2	0.394677	2.86593e-92	7.64e-88	0.97	0.83	GMP
TBC1D1	0.251326	3.83442e-92	1.02218e-87	0.396	0.124	GMP
NUDT8	0.28437	4.77648e-92	1.27332e-87	0.341	0.093	GMP
CD38	0.318021	6.24541e-92	1.6649e-87	0.59	0.265	GMP
SPCS3	0.363447	1.26356e-91	3.36841e-87	0.657	0.331	GMP
MRPL41	0.367018	1.60512e-91	4.27893e-87	0.68	0.358	GMP
TTC7A	0.196905	2.54568e-91	6.78627e-87	0.247	0.047	GMP
ATP5IF1	0.361194	6.26217e-91	1.66937e-86	0.626	0.301	GMP
CPM	0.111703	6.53152e-91	1.74117e-86	0.122	0.007	GMP
RNASEH2B	0.371683	6.76715e-91	1.80399e-86	0.874	0.617	GMP
APLP2	0.416564	8.89786e-91	2.37199e-86	0.847	0.577	GMP
ATP5MD	0.38852	1.30396e-90	3.47611e-86	0.548	0.233	GMP
CENPX	0.345919	1.68763e-90	4.49888e-86	0.451	0.163	GMP
MIF4GD	0.327235	9.60585e-90	2.56073e-85	0.569	0.256	GMP
AKR7A2	0.33113	1.17746e-88	3.13887e-84	0.516	0.213	GMP
COMMD8	0.299874	1.19955e-88	3.19775e-84	0.565	0.25	GMP
PDIA6	0.38972	1.20223e-88	3.20491e-84	0.88	0.646	GMP
ATP5PB	0.379126	1.78599e-88	4.76109e-84	0.603	0.281	GMP
SNRNP25	0.350402	4.17975e-88	1.11424e-83	0.633	0.317	GMP
SIRPB2	0.119583	4.36142e-88	1.16267e-83	0.118	0.006	GMP
AGTRAP	0.333407	4.67574e-88	1.24646e-83	0.499	0.203	GMP
MAPKAPK2	0.22732	5.47397e-88	1.45925e-83	0.391	0.128	GMP
GAPDH	0.29232	1.02077e-87	2.72116e-83	1	0.996	GMP
RPL41	0.395684	1.33154e-87	3.54962e-83	1	0.999	GMP
ACTN1	0.317634	1.48694e-87	3.96389e-83	0.549	0.239	GMP
CD84	0.32625	1.62752e-87	4.33864e-83	0.577	0.261	GMP
NUP210	0.305261	1.92207e-87	5.12384e-83	0.473	0.187	GMP
HNMT	0.16396	1.93679e-87	5.1631e-83	0.193	0.029	GMP
PFN1	0.325073	2.03956e-87	5.43706e-83	0.991	0.934	GMP
MAZ	0.320759	2.35565e-87	6.27969e-83	0.544	0.239	GMP
IGLL1	0.310226	2.62644e-87	7.00157e-83	0.773	0.448	GMP
HNRNPD	0.392407	5.37023e-87	1.4316e-82	0.836	0.541	GMP
BCL7C	0.316508	5.42997e-87	1.44752e-82	0.481	0.189	GMP
FAM173A	0.258246	6.77663e-87	1.80652e-82	0.337	0.096	GMP
LRMDA	0.252921	7.02845e-87	1.87364e-82	0.338	0.095	GMP
CHD3	0.28198	1.23379e-86	3.28904e-82	0.406	0.137	GMP
HSPA5	0.414251	1.44699e-86	3.85738e-82	0.795	0.503	GMP
UBE2J1	0.333614	2.04469e-86	5.45073e-82	0.658	0.337	GMP
CNPY3	0.338006	2.1693e-86	5.78292e-82	0.788	0.48	GMP
NDRG1	0.19741	4.49018e-86	1.19699e-81	0.312	0.086	GMP
TRIR	0.309107	4.51169e-86	1.20273e-81	0.611	0.301	GMP
ATP6V0B	0.35976	1.3012e-85	3.46873e-81	0.842	0.571	GMP
AK4	0.200176	2.41327e-85	6.43329e-81	0.261	0.057	GMP
CCDC88A	0.386171	2.52842e-85	6.74025e-81	0.691	0.376	GMP
KCNE3	0.147925	2.95094e-85	7.86661e-81	0.17	0.021	GMP
CPVL	0.300617	4.18828e-85	1.11651e-80	0.484	0.193	GMP
ATP5F1C	0.387467	7.79678e-85	2.07847e-80	0.624	0.306	GMP
MCM6	0.331187	1.24985e-84	3.33186e-80	0.517	0.221	GMP
TNFAIP2	0.143421	1.66728e-84	4.44464e-80	0.168	0.023	GMP
FBP1	0.126463	2.58817e-84	6.89954e-80	0.156	0.021	GMP
AHNAK	0.293359	3.13897e-84	8.36788e-80	0.457	0.176	GMP
ATP5PO	0.403161	3.56576e-84	9.50561e-80	0.638	0.32	GMP
ATP5ME	0.294845	1.52204e-83	4.05746e-79	0.423	0.152	GMP
ITM2C	0.273277	1.58982e-83	4.23814e-79	0.847	0.542	GMP
DMAC1	0.286809	2.57825e-83	6.87311e-79	0.483	0.195	GMP
BIK	0.131344	8.31736e-83	2.21724e-78	0.159	0.018	GMP
GRB2	0.358099	1.18943e-82	3.17078e-78	0.66	0.356	GMP
GNPTAB	0.291948	1.4415e-82	3.84275e-78	0.478	0.192	GMP
ANAPC11	0.362874	1.51613e-82	4.04169e-78	0.84	0.571	GMP
AC004687.1	0.279589	1.67152e-82	4.45593e-78	0.361	0.113	GMP
PRKCD	0.16236	2.04486e-82	5.45119e-78	0.171	0.022	GMP
RTRAF	0.275216	3.33197e-82	8.88237e-78	0.61	0.317	GMP
VSIR	0.24217	9.53892e-82	2.54289e-77	0.31	0.085	GMP
SPARC	0.260153	1.03049e-81	2.74708e-77	0.437	0.163	GMP
ARPC3	0.287829	1.05637e-81	2.81607e-77	0.991	0.937	GMP
ATL3	0.254662	1.14552e-81	3.05371e-77	0.394	0.135	GMP
COX5B	0.318642	1.55587e-81	4.14763e-77	0.974	0.827	GMP
CBL	0.197748	1.97034e-81	5.25254e-77	0.268	0.065	GMP
RAB27A	0.252451	2.29157e-81	6.10886e-77	0.406	0.143	GMP
SFPQ	0.3832	3.08834e-81	8.2329e-77	0.836	0.551	GMP
UBA52	0.196353	3.26497e-81	8.70377e-77	1	0.999	GMP
MS4A7	0.156327	3.74202e-81	9.97547e-77	0.192	0.031	GMP
PHGDH	0.236606	4.55281e-81	1.21369e-76	0.564	0.271	GMP
RAC1	0.380085	5.13329e-81	1.36843e-76	0.68	0.385	GMP
NAGA	0.180791	5.93348e-81	1.58175e-76	0.272	0.066	GMP
ITGAL	0.151123	6.19913e-81	1.65256e-76	0.202	0.035	GMP
ARHGAP4	0.269197	8.5996e-81	2.29248e-76	0.495	0.206	GMP
PAG1	0.184976	1.01933e-80	2.71733e-76	0.276	0.07	GMP
HAL	0.1315	1.29599e-80	3.45486e-76	0.138	0.013	GMP
CHCHD10	0.296765	1.33198e-80	3.55079e-76	0.422	0.154	GMP
TOP1MT	0.253757	1.63235e-80	4.35152e-76	0.517	0.226	GMP
ARHGAP17	0.210143	2.17887e-80	5.80844e-76	0.347	0.108	GMP
NDUFB11	0.326476	2.2972e-80	6.12386e-76	0.952	0.773	GMP
IMPA2	0.271368	3.20501e-80	8.54393e-76	0.513	0.221	GMP
HDHD5	0.222041	3.64905e-80	9.72763e-76	0.287	0.074	GMP
LAMTOR4	0.330643	6.26838e-80	1.67102e-75	0.92	0.705	GMP
NLRP3	0.180073	7.65445e-80	2.04052e-75	0.252	0.062	GMP
TYMS	0.346619	2.01097e-79	5.36084e-75	0.604	0.297	GMP
NUCB2	0.334856	2.01274e-79	5.36557e-75	0.975	0.864	GMP
FAM120A	0.308972	4.86252e-79	1.29625e-74	0.564	0.267	GMP
C19orf24	0.305542	9.25537e-79	2.4673e-74	0.451	0.181	GMP
TPM3	0.354625	9.7781e-79	2.60665e-74	0.933	0.786	GMP
TDRD7	0.132063	1.17197e-78	3.12424e-74	0.147	0.016	GMP
ZNF106	0.286205	1.2554e-78	3.34665e-74	0.565	0.266	GMP
WDFY2	0.253999	1.31534e-78	3.50644e-74	0.54	0.246	GMP
FUOM	0.223059	2.01366e-78	5.36801e-74	0.365	0.12	GMP
RANBP1	0.353697	3.3624e-78	8.96348e-74	0.878	0.617	GMP
KCNAB2	0.254085	3.52645e-78	9.40081e-74	0.514	0.228	GMP
EIF3A	0.337395	5.44818e-78	1.45238e-73	0.889	0.625	GMP
CLTC	0.283911	5.64626e-78	1.50518e-73	0.525	0.234	GMP
HNRNPAB	0.344432	1.13954e-77	3.03778e-73	0.747	0.441	GMP
LAT2	0.247737	1.29597e-77	3.4548e-73	0.714	0.408	GMP
GPR65	0.116849	1.30132e-77	3.46906e-73	0.146	0.016	GMP
UVRAG	0.235292	3.21689e-77	8.57559e-73	0.419	0.157	GMP
SND1	0.299869	3.75294e-77	1.00046e-72	0.623	0.319	GMP
LILRA2	0.16757	4.06921e-77	1.08477e-72	0.205	0.038	GMP
TMPO	0.358802	6.15827e-77	1.64167e-72	0.676	0.373	GMP
CD81	0.253602	1.78994e-76	4.77163e-72	0.468	0.192	GMP
HDGF	0.283295	2.24684e-76	5.98963e-72	0.557	0.263	GMP
PPP1R14B	0.255911	4.35902e-76	1.16203e-71	0.468	0.194	GMP
GLIPR1	0.173366	5.7498e-76	1.53278e-71	0.645	0.367	GMP
EIF3B	0.294647	6.30463e-76	1.68069e-71	0.526	0.239	GMP
GSTO1	0.322141	6.93591e-76	1.84897e-71	0.906	0.691	GMP
ODC1	0.260654	7.31785e-76	1.95079e-71	0.483	0.206	GMP
WDR49	0.103399	9.1712e-76	2.44486e-71	0.137	0.016	GMP
PSMB3	0.317751	1.01167e-75	2.69692e-71	0.895	0.647	GMP
NCKAP1L	0.27481	1.29447e-75	3.45081e-71	0.606	0.306	GMP
RHOU	0.102222	1.47365e-75	3.92846e-71	0.111	0.008	GMP
PLXNB2	0.14733	1.90074e-75	5.06699e-71	0.2	0.038	GMP
PXK	0.242777	2.22288e-75	5.92576e-71	0.389	0.138	GMP
STXBP2	0.315062	2.62628e-75	7.00114e-71	0.515	0.236	GMP
PRKDC	0.337591	2.80881e-75	7.48773e-71	0.737	0.435	GMP
IRF5	0.183407	3.46638e-75	9.24067e-71	0.327	0.105	GMP
MZT2B	0.340693	7.51822e-75	2.00421e-70	0.893	0.668	GMP
COPS9	0.295956	8.80102e-75	2.34618e-70	0.462	0.191	GMP
CST3	0.403186	1.19286e-74	3.17992e-70	0.854	0.598	GMP
REX1BD	0.269529	1.41527e-74	3.77282e-70	0.497	0.221	GMP
RPL28	0.153209	2.53458e-74	6.75667e-70	1	1	GMP
TXNDC17	0.303664	2.57704e-74	6.86987e-70	0.713	0.415	GMP
HEXB	0.189666	2.6742e-74	7.12889e-70	0.486	0.223	GMP
COX7B	0.326464	1.38298e-73	3.68676e-69	0.911	0.695	GMP
MIF	0.328088	2.6662e-73	7.10757e-69	0.887	0.638	GMP
RPA3	0.310048	2.8625e-73	7.63085e-69	0.741	0.444	GMP
PAK1	0.190855	2.95627e-73	7.88082e-69	0.325	0.103	GMP
RPS16	0.192264	4.06779e-73	1.08439e-68	1	1	GMP
CASP1	0.178903	6.44916e-73	1.71922e-68	0.362	0.138	GMP
NPW	0.279692	6.79677e-73	1.81188e-68	0.369	0.129	GMP
CALM1	0.340948	7.61376e-73	2.02968e-68	0.865	0.627	GMP
KLF4	0.166944	1.04193e-72	2.77757e-68	0.213	0.048	GMP
ATOX1	0.310681	1.08281e-72	2.88654e-68	0.679	0.385	GMP
IFI27L2	0.220376	1.25701e-72	3.35093e-68	0.49	0.224	GMP
DNMT1	0.334889	1.34619e-72	3.58867e-68	0.68	0.389	GMP
AKNA	0.152658	4.77903e-72	1.274e-67	0.335	0.122	GMP
DDT	0.298605	7.27279e-72	1.93878e-67	0.907	0.673	GMP
NENF	0.263209	1.27461e-71	3.39785e-67	0.559	0.276	GMP
PPIF	0.240419	1.3369e-71	3.56391e-67	0.423	0.167	GMP
IGFBP2	0.135711	1.62638e-71	4.3356e-67	0.161	0.023	GMP
SET	0.328388	1.1109e-70	2.96143e-66	0.952	0.784	GMP
PLEKHO1	0.160525	1.93367e-70	5.15478e-66	0.341	0.129	GMP
TIMP2	0.159669	2.42076e-70	6.45325e-66	0.244	0.065	GMP
NUDT5	0.283357	3.01522e-70	8.03796e-66	0.708	0.418	GMP
TNFRSF1B	0.127625	4.03651e-70	1.07605e-65	0.161	0.024	GMP
LAIR1	0.176974	6.47197e-70	1.7253e-65	0.581	0.315	GMP
HEBP2	0.299626	7.81491e-70	2.0833e-65	0.551	0.269	GMP
EGR1	0.203755	1.50939e-69	4.02373e-65	0.305	0.099	GMP
SRM	0.262143	1.66482e-69	4.43808e-65	0.492	0.222	GMP
ELOC	0.233922	2.09848e-69	5.59414e-65	0.44	0.187	GMP
LAMTOR2	0.306206	2.58493e-69	6.89092e-65	0.72	0.439	GMP
SUB1	0.286893	2.9697e-69	7.91662e-65	0.961	0.87	GMP
SRGAP2	0.141132	3.77665e-69	1.00678e-64	0.189	0.036	GMP
DENND3	0.156218	1.0652e-68	2.8396e-64	0.243	0.062	GMP
NASP	0.333244	1.69366e-68	4.51496e-64	0.879	0.647	GMP
SFMBT2	0.139292	1.70666e-68	4.54961e-64	0.181	0.033	GMP
PRELID1	0.328195	2.85697e-68	7.61612e-64	0.68	0.396	GMP
UBE2Q2	0.241196	3.30889e-68	8.82085e-64	0.354	0.125	GMP
COX5A	0.287746	3.6268e-68	9.66833e-64	0.954	0.794	GMP
PDCD5	0.322883	4.63304e-68	1.23507e-63	0.795	0.547	GMP
DEK	0.344618	9.26022e-68	2.46859e-63	0.897	0.687	GMP
SEL1L3	0.113577	9.65256e-68	2.57318e-63	0.167	0.033	GMP
STMP1	0.223169	1.04637e-67	2.78941e-63	0.512	0.254	GMP
TXN	0.26837	1.07228e-67	2.85847e-63	0.986	0.9	GMP
PDIA4	0.25875	1.07447e-67	2.86431e-63	0.526	0.252	GMP
CYBC1	0.210036	1.1595e-67	3.09101e-63	0.325	0.108	GMP
NDUFA12	0.311217	1.31364e-67	3.50191e-63	0.825	0.583	GMP
GAPT	0.187419	2.93702e-67	7.8295e-63	0.604	0.335	GMP
SEMA4A	0.139341	2.97506e-67	7.93092e-63	0.192	0.04	GMP
PTPRE	0.163984	3.47733e-67	9.26986e-63	0.317	0.11	GMP
CTSH	0.120308	4.01042e-67	1.0691e-62	0.111	0.01	GMP
QSOX1	0.205118	4.82251e-67	1.28558e-62	0.32	0.105	GMP
APPL1	0.27176	5.48113e-67	1.46116e-62	0.693	0.406	GMP
RAB11FIP1	0.201565	7.85012e-67	2.09269e-62	0.287	0.086	GMP
DUT	0.309893	8.28373e-67	2.20828e-62	0.911	0.679	GMP
OAZ1	0.257887	1.85448e-66	4.94366e-62	0.998	0.969	GMP
GPT2	0.132459	2.09101e-66	5.5742e-62	0.173	0.03	GMP
CTNNBIP1	0.200273	2.14508e-66	5.71835e-62	0.311	0.1	GMP
MRPS34	0.277458	2.95981e-66	7.89027e-62	0.759	0.477	GMP
PAXX	0.226189	3.12898e-66	8.34123e-62	0.377	0.143	GMP
EIF4G1	0.261383	4.4098e-66	1.17557e-61	0.513	0.245	GMP
NUCKS1	0.321009	5.25963e-66	1.40211e-61	0.948	0.772	GMP
TMX4	0.230394	8.79441e-66	2.34441e-61	0.469	0.21	GMP
GPR183	0.188936	9.24031e-66	2.46328e-61	0.24	0.067	GMP
ROGDI	0.218783	1.22161e-65	3.25656e-61	0.303	0.097	GMP
PM20D2	0.235673	2.3551e-65	6.27822e-61	0.458	0.202	GMP
PRDX5	0.272565	3.99377e-65	1.06466e-60	0.9	0.67	GMP
NAP1L1	0.254221	4.1476e-65	1.10567e-60	0.995	0.985	GMP
TMEM170B	0.145831	4.6026e-65	1.22696e-60	0.154	0.024	GMP
SFT2D2	0.217314	1.18185e-64	3.15059e-60	0.382	0.148	GMP
UQCRQ	0.302494	1.204e-64	3.20961e-60	0.879	0.64	GMP
UQCR10	0.300769	1.55258e-64	4.13886e-60	0.889	0.682	GMP
MCM7	0.280854	1.65557e-64	4.41341e-60	0.702	0.42	GMP
MFSD10	0.263464	1.71076e-64	4.56054e-60	0.623	0.343	GMP
SHTN1	0.137455	2.3127e-64	6.16518e-60	0.157	0.026	GMP
SGK3	0.197865	3.57084e-64	9.51915e-60	0.393	0.161	GMP
PHF19	0.234276	3.98558e-64	1.06248e-59	0.407	0.166	GMP
CAPNS1	0.246356	5.42695e-64	1.44672e-59	0.621	0.342	GMP
HERC5	0.21881	6.33469e-64	1.6887e-59	0.261	0.074	GMP
JPT1	0.298669	6.48254e-64	1.72811e-59	0.398	0.16	GMP
AGTPBP1	0.197996	1.02424e-63	2.73042e-59	0.261	0.075	GMP
SMARCD2	0.209483	1.07917e-63	2.87686e-59	0.377	0.146	GMP
TOP2B	0.249642	1.94856e-63	5.19448e-59	0.631	0.352	GMP
SSR3	0.277845	4.69092e-63	1.25051e-58	0.802	0.539	GMP
PABPC4	0.227145	5.69893e-63	1.51922e-58	0.515	0.253	GMP
NRXN2	0.100619	6.95186e-63	1.85323e-58	0.126	0.015	GMP
HOMER3	0.124694	7.43829e-63	1.9829e-58	0.112	0.011	GMP
AURKAIP1	0.283509	7.62164e-63	2.03178e-58	0.793	0.533	GMP
TAF10	0.242127	8.16419e-63	2.17641e-58	0.463	0.212	GMP
COPE	0.277514	1.14651e-62	3.05636e-58	0.894	0.675	GMP
NAA38	0.212424	1.64085e-62	4.37418e-58	0.834	0.575	GMP
BAG1	0.278054	2.3296e-62	6.21026e-58	0.53	0.265	GMP
TMEM205	0.263415	2.53512e-62	6.75813e-58	0.648	0.371	GMP
FAAH	0.121145	3.33017e-62	8.87757e-58	0.171	0.032	GMP
MFSD12	0.1638	9.22907e-62	2.46028e-57	0.241	0.065	GMP
RABL6	0.244129	1.13855e-61	3.03516e-57	0.435	0.191	GMP
DAP	0.186125	1.17707e-61	3.13784e-57	0.382	0.156	GMP
GOLGA8Q	0.1318	2.0687e-61	5.51474e-57	0.166	0.031	GMP
TRIM28	0.243504	2.82309e-61	7.5258e-57	0.58	0.31	GMP
TPP1	0.201997	3.736e-61	9.95943e-57	0.471	0.224	GMP
MESD	0.21811	3.81411e-61	1.01676e-56	0.423	0.187	GMP
SLC38A10	0.210686	3.89406e-61	1.03808e-56	0.356	0.136	GMP
HELLS	0.276528	4.02096e-61	1.07191e-56	0.521	0.26	GMP
CLSPN	0.267578	5.94775e-61	1.58555e-56	0.386	0.158	GMP
MSRB2	0.237777	6.29113e-61	1.67709e-56	0.483	0.229	GMP
AC007952.4	0.173631	8.08269e-61	2.15468e-56	0.247	0.071	GMP
ANXA6	0.156141	8.86546e-61	2.36335e-56	0.445	0.224	GMP
ADGRE5	0.16884	9.86733e-61	2.63043e-56	0.335	0.129	GMP
MAP3K2	0.182125	1.28291e-60	3.41998e-56	0.368	0.149	GMP
TIMM8B	0.275028	1.32472e-60	3.53143e-56	0.721	0.452	GMP
TRAF3IP3	0.182279	1.49656e-60	3.98953e-56	0.504	0.258	GMP
CDCA7	0.275033	1.88054e-60	5.01315e-56	0.553	0.289	GMP
PGP	0.179973	2.69397e-60	7.18157e-56	0.257	0.076	GMP
NDUFAB1	0.273012	2.83816e-60	7.56597e-56	0.856	0.62	GMP
RAN	0.276502	3.34576e-60	8.91911e-56	0.968	0.864	GMP
SELENOF	0.221519	3.82859e-60	1.02063e-55	0.492	0.246	GMP
NDUFA2	0.274833	4.95717e-60	1.32148e-55	0.824	0.577	GMP
ARHGAP30	0.187263	5.17546e-60	1.37967e-55	0.405	0.178	GMP
RTF2	0.209874	6.89495e-60	1.83806e-55	0.457	0.219	GMP
FKBP2	0.283163	7.33467e-60	1.95528e-55	0.775	0.515	GMP
PDE3B	0.127867	1.01775e-59	2.71311e-55	0.137	0.023	GMP
TPI1	0.262757	1.12395e-59	2.99622e-55	0.969	0.845	GMP
PCNA	0.302718	1.4088e-59	3.75559e-55	0.686	0.415	GMP
IKZF1	0.230771	2.07485e-59	5.53112e-55	0.58	0.315	GMP
SMG1	0.231595	2.69207e-59	7.17651e-55	0.482	0.232	GMP
SRRM2	0.315154	3.40185e-59	9.06865e-55	0.786	0.538	GMP
LSP1	0.225185	3.41195e-59	9.09559e-55	0.661	0.392	GMP
GM2A	0.170654	6.41657e-59	1.71053e-54	0.239	0.066	GMP
HDLBP	0.249981	6.93558e-59	1.84889e-54	0.55	0.288	GMP
PIK3CD	0.150601	9.59777e-59	2.55857e-54	0.229	0.064	GMP
MBNL1	0.259201	1.04383e-58	2.78263e-54	0.772	0.509	GMP
CTDNEP1	0.236028	1.11328e-58	2.96778e-54	0.502	0.249	GMP
GOLGA8M	0.106368	1.38766e-58	3.69921e-54	0.133	0.019	GMP
RNH1	0.266801	2.45749e-58	6.55118e-54	0.678	0.411	GMP
CRTAP	0.23552	2.61263e-58	6.96474e-54	0.485	0.235	GMP
NDUFS6	0.281428	3.25625e-58	8.68052e-54	0.828	0.59	GMP
RRP7A	0.224871	4.55834e-58	1.21516e-53	0.598	0.335	GMP
SLC4A7	0.176573	4.65476e-58	1.24087e-53	0.244	0.07	GMP
HMGN1	0.26185	5.95535e-58	1.58758e-53	0.973	0.874	GMP
SELENOW	0.216138	6.82208e-58	1.81863e-53	0.442	0.208	GMP
P2RY8	0.166695	7.60501e-58	2.02734e-53	0.339	0.135	GMP
POLR2J3.1	0.228099	1.05592e-57	2.81488e-53	0.348	0.134	GMP
XPO1	0.263202	2.1333e-57	5.68695e-53	0.582	0.321	GMP
STUB1	0.194628	2.76948e-57	7.38288e-53	0.461	0.223	GMP
RASSF2	0.123832	3.65532e-57	9.74435e-53	0.227	0.069	GMP
IRAK3	0.249987	3.72009e-57	9.91703e-53	0.497	0.248	GMP
AK2	0.250477	4.10719e-57	1.0949e-52	0.716	0.452	GMP
HLA-A	0.264529	4.78282e-57	1.275e-52	0.988	0.947	GMP
BEX3	0.184163	7.7484e-57	2.06557e-52	0.49	0.261	GMP
TOMM40	0.196627	8.54511e-57	2.27795e-52	0.42	0.191	GMP
NIN	0.21463	9.92882e-57	2.64683e-52	0.451	0.214	GMP
DHX9	0.249047	1.58177e-56	4.21669e-52	0.575	0.315	GMP
RPN1	0.249729	1.68235e-56	4.48482e-52	0.581	0.322	GMP
MFSD1	0.224978	1.90278e-56	5.07242e-52	0.571	0.313	GMP
MCMBP	0.170505	1.90394e-56	5.07553e-52	0.3	0.105	GMP
RPS6KA1	0.189205	2.95625e-56	7.88077e-52	0.355	0.143	GMP
STMN1	0.252206	3.59982e-56	9.5964e-52	0.974	0.858	GMP
SMIM26	0.141241	4.61958e-56	1.23149e-51	0.488	0.269	GMP
SIVA1	0.285124	4.95836e-56	1.3218e-51	0.826	0.588	GMP
CYC1	0.230983	8.40082e-56	2.23949e-51	0.698	0.436	GMP
TRIM14	0.192566	8.45504e-56	2.25394e-51	0.307	0.11	GMP
NCL	0.300695	9.36676e-56	2.49699e-51	0.96	0.839	GMP
FDX1	0.18167	1.13102e-55	3.01508e-51	0.389	0.169	GMP
HSP90AA1	0.257885	1.19947e-55	3.19755e-51	0.988	0.956	GMP
NXT2	0.169462	1.21547e-55	3.24019e-51	0.276	0.091	GMP
MRPS12	0.22241	1.42823e-55	3.80738e-51	0.65	0.389	GMP
EIF4EBP1	0.269812	1.75637e-55	4.68213e-51	0.754	0.503	GMP
METTL9	0.248615	2.08079e-55	5.54698e-51	0.652	0.391	GMP
NSD2	0.226865	2.38993e-55	6.37107e-51	0.286	0.1	GMP
CENPW	0.21229	2.96365e-55	7.90049e-51	0.535	0.286	GMP
ADA2	0.116286	3.38852e-55	9.03312e-51	0.145	0.025	GMP
PDIA3	0.310877	3.45835e-55	9.21927e-51	0.815	0.604	GMP
VPS13C	0.249929	5.08262e-55	1.35493e-50	0.476	0.234	GMP
DIAPH2	0.189216	6.7318e-55	1.79456e-50	0.308	0.114	GMP
S100A6	0.127393	8.6129e-55	2.29603e-50	0.944	0.747	GMP
CALCOCO2	0.195298	8.80023e-55	2.34596e-50	0.491	0.251	GMP
SPTAN1	0.1111	1.26298e-54	3.36686e-50	0.234	0.08	GMP
HIGD2A	0.256275	1.43316e-54	3.82051e-50	0.889	0.678	GMP
SIPA1	0.172854	1.71692e-54	4.57697e-50	0.292	0.104	GMP
SLC25A24	0.139258	2.18491e-54	5.82454e-50	0.243	0.078	GMP
BRI3	0.218095	2.24382e-54	5.98159e-50	0.337	0.132	GMP
COPRS	0.182153	2.67326e-54	7.12638e-50	0.325	0.125	GMP
RMDN1	0.209272	3.0328e-54	8.08483e-50	0.445	0.211	GMP
SLC25A5	0.235059	3.91791e-54	1.04444e-49	0.973	0.844	GMP
MCRIP1	0.181218	4.02345e-54	1.07257e-49	0.334	0.133	GMP
YY1	0.2712	4.33603e-54	1.1559e-49	0.689	0.433	GMP
COX6C	0.241856	4.43923e-54	1.18341e-49	0.971	0.846	GMP
HILPDA	0.211082	4.84423e-54	1.29138e-49	0.31	0.119	GMP
NME4	0.224897	5.19259e-54	1.38424e-49	0.645	0.389	GMP
IKBIP	0.215263	6.72692e-54	1.79326e-49	0.514	0.268	GMP
SNX27	0.13033	6.9146e-54	1.84329e-49	0.268	0.095	GMP
B4GALT5	0.159573	8.74978e-54	2.33252e-49	0.242	0.073	GMP
MPST	0.126935	1.07079e-53	2.85451e-49	0.568	0.34	GMP
SNRPF	0.25444	1.15912e-53	3.08999e-49	0.928	0.742	GMP
S100Z	0.116057	1.27084e-53	3.3878e-49	0.178	0.045	GMP
ARRDC1	0.19409	1.33326e-53	3.55419e-49	0.403	0.182	GMP
TUT4	0.168178	1.33842e-53	3.56797e-49	0.377	0.171	GMP
HERPUD1	0.150903	1.36274e-53	3.6328e-49	0.423	0.203	GMP
EDEM1	0.1371	1.45269e-53	3.87258e-49	0.218	0.063	GMP
GPI	0.269643	1.46992e-53	3.91852e-49	0.537	0.292	GMP
PRKCB	0.16128	1.74205e-53	4.64397e-49	0.458	0.234	GMP
CERK	0.155215	2.72635e-53	7.2679e-49	0.259	0.086	GMP
SLC38A2	0.223626	3.44659e-53	9.18793e-49	0.544	0.297	GMP
DDX39A	0.236792	3.55542e-53	9.47804e-49	0.614	0.36	GMP
UFD1	0.183592	3.58243e-53	9.55005e-49	0.342	0.14	GMP
GUSB	0.216763	4.15114e-53	1.10661e-48	0.583	0.331	GMP
CEACAM4	0.116846	4.62787e-53	1.2337e-48	0.204	0.062	GMP
H1FX	0.175631	5.71512e-53	1.52354e-48	0.521	0.29	GMP
NME1	0.261017	5.87461e-53	1.56605e-48	0.828	0.593	GMP
AGO4	0.144554	6.61831e-53	1.76431e-48	0.215	0.06	GMP
FUT7	0.130173	6.7857e-53	1.80893e-48	0.217	0.064	GMP
GNB1	0.238778	9.07972e-53	2.42047e-48	0.542	0.295	GMP
SOAT1	0.132695	9.50016e-53	2.53255e-48	0.211	0.059	GMP
AC245297.3	0.175199	1.07375e-52	2.86241e-48	0.321	0.128	GMP
CLTB	0.172786	1.09133e-52	2.90928e-48	0.329	0.131	GMP
LRPPRC	0.203618	1.22008e-52	3.25249e-48	0.509	0.269	GMP
LINC00926	0.104246	1.48911e-52	3.96966e-48	0.121	0.018	GMP
GNB2	0.204331	1.75712e-52	4.68414e-48	0.523	0.28	GMP
HMGB1	0.262315	1.7753e-52	4.7326e-48	0.999	0.979	GMP
EDEM3	0.18961	2.15043e-52	5.73262e-48	0.3	0.11	GMP
USP1	0.24201	2.47118e-52	6.58767e-48	0.643	0.389	GMP
POLE4	0.235557	2.49455e-52	6.64998e-48	0.587	0.336	GMP
LBR	0.22269	3.04152e-52	8.10808e-48	0.576	0.327	GMP
HIKESHI	0.175784	3.50932e-52	9.35515e-48	0.37	0.165	GMP
CDK2AP2	0.162089	3.55021e-52	9.46414e-48	0.455	0.23	GMP
EIF5	0.257947	3.66742e-52	9.77661e-48	0.797	0.558	GMP
EFCAB2	0.171348	4.56072e-52	1.2158e-47	0.323	0.127	GMP
STT3B	0.163736	4.78336e-52	1.27515e-47	0.504	0.274	GMP
PARP8	0.114889	4.86342e-52	1.29649e-47	0.159	0.034	GMP
NDUFS7	0.233404	5.4001e-52	1.43956e-47	0.775	0.53	GMP
IDH1	0.187929	5.69233e-52	1.51746e-47	0.418	0.197	GMP
ESYT2	0.168876	6.45217e-52	1.72002e-47	0.363	0.157	GMP
HCLS1	0.244349	8.47637e-52	2.25963e-47	0.639	0.388	GMP
PREX1	0.164639	1.02024e-51	2.71975e-47	0.312	0.121	GMP
TAPBP	0.195667	1.08131e-51	2.88256e-47	0.676	0.426	GMP
TPM4	0.223265	1.45867e-51	3.88853e-47	0.567	0.321	GMP
UBL5	0.262621	1.54898e-51	4.12926e-47	0.918	0.735	GMP
NSD3	0.146692	1.60641e-51	4.28237e-47	0.416	0.214	GMP
YBX3	0.196166	1.95346e-51	5.20754e-47	0.749	0.503	GMP
TIFA	0.166878	2.16068e-51	5.75994e-47	0.326	0.132	GMP
TOPBP1	0.203339	3.6208e-51	9.65233e-47	0.402	0.183	GMP
ARPC4	0.242652	3.83648e-51	1.02273e-46	0.751	0.505	GMP
ALCAM	0.136201	4.08645e-51	1.08937e-46	0.312	0.13	GMP
DOCK10	0.135017	4.89371e-51	1.30457e-46	0.237	0.078	GMP
SATB1	0.21873	5.14329e-51	1.3711e-46	0.569	0.323	GMP
MYH9	0.184512	6.89299e-51	1.83753e-46	0.472	0.244	GMP
ECPAS	0.161476	7.41525e-51	1.97676e-46	0.238	0.074	GMP
HVCN1	0.102877	7.85527e-51	2.09406e-46	0.166	0.041	GMP
CEP350	0.214326	8.225e-51	2.19262e-46	0.476	0.244	GMP
TIMM13	0.192096	8.77959e-51	2.34046e-46	0.896	0.684	GMP
GPCPD1	0.144917	8.95617e-51	2.38754e-46	0.286	0.108	GMP
STT3A	0.164973	1.12807e-50	3.0072e-46	0.382	0.173	GMP
KDM5A	0.225197	1.18817e-50	3.16741e-46	0.546	0.303	GMP
ARPC5	0.293125	1.25113e-50	3.33527e-46	0.857	0.673	GMP
TRGC1	0.117171	1.25261e-50	3.33922e-46	0.122	0.019	GMP
CHAMP1	0.156344	1.37987e-50	3.67847e-46	0.287	0.106	GMP
ADPGK	0.189016	1.47253e-50	3.92547e-46	0.434	0.211	GMP
COX4I1	0.181733	1.55713e-50	4.15099e-46	0.996	0.991	GMP
IER2	0.266223	1.93644e-50	5.16215e-46	0.632	0.383	GMP
CGAS	0.120356	1.97183e-50	5.25651e-46	0.171	0.04	GMP
KHSRP	0.203321	2.57612e-50	6.86743e-46	0.468	0.237	GMP
FTL	0.210523	2.57647e-50	6.86837e-46	1	0.998	GMP
PIK3CG	0.130019	2.5908e-50	6.90655e-46	0.21	0.065	GMP
PGAM1	0.269736	3.64003e-50	9.7036e-46	0.748	0.51	GMP
SUZ12	0.259515	3.71508e-50	9.90367e-46	0.544	0.302	GMP
LAMP1	0.177083	4.37393e-50	1.166e-45	0.411	0.196	GMP
CAPG	0.116451	4.9132e-50	1.30976e-45	0.475	0.272	GMP
DUSP3	0.103568	8.37886e-50	2.23364e-45	0.26	0.106	GMP
NCOA4	0.265745	8.80399e-50	2.34697e-45	0.636	0.392	GMP
PSMB9	0.165104	1.01596e-49	2.70836e-45	0.725	0.487	GMP
FAR1	0.163925	1.21817e-49	3.2474e-45	0.296	0.112	GMP
POLR2L	0.207232	1.44475e-49	3.85141e-45	0.769	0.53	GMP
TRAPPC2L	0.22696	1.48198e-49	3.95068e-45	0.56	0.318	GMP
BTG1	0.122426	1.8176e-49	4.84536e-45	0.597	0.366	GMP
LENG8	0.147832	2.08433e-49	5.5564e-45	0.302	0.121	GMP
SEC61G	0.230833	2.14074e-49	5.70678e-45	0.867	0.652	GMP
HMGA1	0.178977	2.28574e-49	6.09332e-45	0.847	0.622	GMP
CDT1	0.202062	2.42279e-49	6.45867e-45	0.377	0.168	GMP
ZFAND5	0.214525	2.5605e-49	6.82577e-45	0.543	0.304	GMP
CCDC167	0.174807	2.79349e-49	7.44689e-45	0.394	0.183	GMP
NUFIP2	0.197149	3.07867e-49	8.20712e-45	0.463	0.238	GMP
DAZAP1	0.186167	3.40168e-49	9.06821e-45	0.505	0.273	GMP
ACAP2	0.200355	3.55859e-49	9.48648e-45	0.481	0.252	GMP
SUPT16H	0.224373	5.46336e-49	1.45642e-44	0.632	0.387	GMP
YWHAH	0.193356	5.94433e-49	1.58464e-44	0.442	0.221	GMP
SKAP2	0.206964	6.06534e-49	1.6169e-44	0.59	0.348	GMP
PTBP1	0.215743	7.3161e-49	1.95033e-44	0.603	0.359	GMP
EIF4EBP2	0.195134	7.34806e-49	1.95885e-44	0.421	0.203	GMP
TPCN1	0.132346	8.05254e-49	2.14665e-44	0.181	0.046	GMP
AKR1B1	0.233034	1.13569e-48	3.02751e-44	0.662	0.417	GMP
ETFB	0.216473	1.35311e-48	3.60712e-44	0.778	0.54	GMP
KTN1	0.259379	1.35593e-48	3.61463e-44	0.687	0.443	GMP
MDFIC	0.107709	1.38704e-48	3.69756e-44	0.174	0.047	GMP
RBM26	0.207855	1.45717e-48	3.88453e-44	0.503	0.272	GMP
DDOST	0.241582	1.65568e-48	4.41372e-44	0.766	0.533	GMP
RP11-1143G9.4	0.220784	2.26179e-48	6.02949e-44	0.104	0.015	GMP
HNRNPH1	0.252141	3.83075e-48	1.0212e-43	0.844	0.63	GMP
PTEN	0.160622	5.37486e-48	1.43283e-43	0.525	0.301	GMP
MCM2	0.20974	5.75716e-48	1.53474e-43	0.408	0.194	GMP
PILRB	0.147081	5.92285e-48	1.57891e-43	0.316	0.131	GMP
CMPK1	0.164018	6.43761e-48	1.71614e-43	0.456	0.239	GMP
FLNB	0.13481	7.73507e-48	2.06201e-43	0.288	0.117	GMP
CHD4	0.220363	1.09136e-47	2.90936e-43	0.681	0.439	GMP
CHCHD1	0.208644	1.10854e-47	2.95514e-43	0.649	0.406	GMP
RNPEP	0.13979	1.12462e-47	2.99802e-43	0.243	0.082	GMP
KDELR2	0.227581	1.21507e-47	3.23914e-43	0.533	0.298	GMP
POMP	0.247845	2.1883e-47	5.83358e-43	0.866	0.667	GMP
SMARCC1	0.224262	2.43343e-47	6.48703e-43	0.679	0.438	GMP
SEC61A1	0.175198	2.6561e-47	7.08063e-43	0.409	0.198	GMP
HIPK3	0.139805	2.80702e-47	7.48295e-43	0.256	0.093	GMP
TRIO	0.111384	3.32706e-47	8.86928e-43	0.172	0.043	GMP
CIITA	0.112688	3.34828e-47	8.92584e-43	0.228	0.081	GMP
FAM111B	0.154552	4.05533e-47	1.08107e-42	0.233	0.076	GMP
COA6	0.158801	4.12774e-47	1.10037e-42	0.527	0.304	GMP
ACTN4	0.23046	4.44819e-47	1.1858e-42	0.539	0.304	GMP
SLBP	0.158547	4.80004e-47	1.27959e-42	0.425	0.218	GMP
TMUB1	0.157278	5.00259e-47	1.33359e-42	0.263	0.094	GMP
IDH2	0.227846	5.4579e-47	1.45497e-42	0.808	0.581	GMP
MAF1	0.153124	6.09914e-47	1.62591e-42	0.45	0.24	GMP
MCRIP2	0.173312	6.69551e-47	1.78489e-42	0.276	0.103	GMP
SPON2	0.112346	1.12061e-46	2.98732e-42	0.158	0.037	GMP
SINHCAF	0.127617	1.2104e-46	3.22669e-42	0.383	0.198	GMP
INSR	0.142785	1.21187e-46	3.2306e-42	0.286	0.113	GMP
S100A4	0.221139	1.21812e-46	3.24725e-42	0.985	0.873	GMP
C6orf62	0.177312	1.65902e-46	4.42261e-42	0.514	0.29	GMP
UQCC2	0.216574	1.90945e-46	5.09021e-42	0.671	0.431	GMP
MRPL12	0.210736	1.94037e-46	5.17265e-42	0.685	0.447	GMP
APBB1IP	0.226866	2.38478e-46	6.35735e-42	0.551	0.317	GMP
PPA1	0.248082	2.54478e-46	6.78387e-42	0.878	0.695	GMP
TRH	0.149301	2.74962e-46	7.32995e-42	0.199	0.058	GMP
SLC12A9	0.131735	3.09899e-46	8.26129e-42	0.198	0.058	GMP
COMMD9	0.191295	3.32966e-46	8.8762e-42	0.519	0.29	GMP
CTDP1	0.123187	3.65902e-46	9.75422e-42	0.197	0.056	GMP
TM9SF3	0.189458	3.75032e-46	9.99762e-42	0.451	0.234	GMP
SACS	0.145249	3.80351e-46	1.01394e-41	0.255	0.091	GMP
AFG3L2	0.170227	4.8395e-46	1.29011e-41	0.314	0.129	GMP
HPF1	0.154285	5.37795e-46	1.43365e-41	0.344	0.158	GMP
TNFAIP8L2	0.123985	5.79792e-46	1.54561e-41	0.378	0.191	GMP
TUBA1B	0.212813	6.05028e-46	1.61288e-41	0.971	0.869	GMP
SH2B3	0.108935	6.32982e-46	1.6874e-41	0.199	0.063	GMP
NFIC	0.162599	7.43165e-46	1.98113e-41	0.457	0.243	GMP
ITPK1	0.124281	7.50263e-46	2.00005e-41	0.186	0.052	GMP
DPYSL2	0.127415	8.12259e-46	2.16532e-41	0.245	0.09	GMP
PLCB2	0.156026	9.28609e-46	2.47549e-41	0.26	0.095	GMP
KRT10	0.198396	1.38895e-45	3.70265e-41	0.56	0.331	GMP
SDF4	0.201188	1.61059e-45	4.29352e-41	0.339	0.147	GMP
MAP3K20	0.141085	1.76148e-45	4.69577e-41	0.242	0.084	GMP
ARL8B	0.163155	1.89506e-45	5.05186e-41	0.379	0.181	GMP
PTTG1	0.254226	1.89574e-45	5.05365e-41	0.539	0.308	GMP
SORL1	0.121148	1.97404e-45	5.2624e-41	0.46	0.267	GMP
DGKD	0.129986	2.01372e-45	5.36816e-41	0.185	0.051	GMP
CTSC	0.196867	2.04238e-45	5.44458e-41	0.679	0.443	GMP
GMPS	0.205605	2.05316e-45	5.47333e-41	0.59	0.355	GMP
TOMM5	0.179278	2.12174e-45	5.65613e-41	0.349	0.154	GMP
DACH1	0.103079	3.25377e-45	8.67391e-41	0.281	0.125	GMP
MARVELD1	0.156605	3.73395e-45	9.95397e-41	0.226	0.073	GMP
WDFY4	0.102817	4.10734e-45	1.09493e-40	0.156	0.039	GMP
PCNX1	0.124178	4.85878e-45	1.29525e-40	0.217	0.073	GMP
TP53I13	0.136583	5.12138e-45	1.36526e-40	0.31	0.135	GMP
ATP1A1	0.120667	6.02053e-45	1.60495e-40	0.388	0.199	GMP
CDK13	0.140171	7.33468e-45	1.95528e-40	0.355	0.166	GMP
SNRPB	0.213934	7.39015e-45	1.97007e-40	0.923	0.749	GMP
ENO1	0.214185	7.63095e-45	2.03426e-40	0.99	0.955	GMP
ECI1	0.179731	8.68714e-45	2.31582e-40	0.353	0.16	GMP
PRPF40A	0.237429	8.77971e-45	2.34049e-40	0.795	0.575	GMP
CNTRL	0.257225	1.00933e-44	2.69067e-40	0.638	0.406	GMP
DHFR	0.227146	1.10411e-44	2.94334e-40	0.447	0.232	GMP
H2AFV	0.23187	1.12069e-44	2.98753e-40	0.857	0.653	GMP
DUS1L	0.153712	1.23825e-44	3.30092e-40	0.265	0.098	GMP
MRPL58	0.15138	1.24112e-44	3.30859e-40	0.259	0.095	GMP
PYGL	0.158029	1.37646e-44	3.66935e-40	0.41	0.21	GMP
PTP4A2	0.199026	1.42637e-44	3.80241e-40	0.566	0.336	GMP
TSR3	0.15072	1.55629e-44	4.14877e-40	0.319	0.137	GMP
SNRPG	0.236625	1.60018e-44	4.26577e-40	0.843	0.637	GMP
MRM2	0.135663	1.95565e-44	5.21337e-40	0.251	0.091	GMP
MANF	0.191244	2.02667e-44	5.4027e-40	0.605	0.375	GMP
ECHDC1	0.16403	2.20836e-44	5.88704e-40	0.463	0.25	GMP
TK1	0.1918	3.20246e-44	8.53711e-40	0.387	0.191	GMP
UQCRC1	0.215104	3.61241e-44	9.62996e-40	0.621	0.388	GMP
STAT6	0.112088	4.96503e-44	1.32358e-39	0.282	0.121	GMP
AC092069.1	0.164939	5.42536e-44	1.44629e-39	0.172	0.045	GMP
PIK3R1	0.174562	5.88546e-44	1.56895e-39	0.501	0.284	GMP
ECHS1	0.221214	6.1886e-44	1.64976e-39	0.734	0.506	GMP
RRBP1	0.164035	7.98698e-44	2.12917e-39	0.404	0.203	GMP
NDUFA4	0.208861	8.0686e-44	2.15093e-39	0.979	0.909	GMP
MBD3	0.153151	8.64103e-44	2.30353e-39	0.27	0.103	GMP
HYOU1	0.152738	9.57379e-44	2.55218e-39	0.253	0.092	GMP
NDUFC2	0.207001	9.87064e-44	2.63132e-39	0.799	0.579	GMP
CNIH4	0.162017	1.15048e-43	3.06694e-39	0.39	0.192	GMP
PRRC2B	0.178857	1.19689e-43	3.19067e-39	0.413	0.208	GMP
CRELD2	0.143779	1.3384e-43	3.56792e-39	0.242	0.086	GMP
GALNT7	0.161308	1.54273e-43	4.11262e-39	0.368	0.177	GMP
SSBP4	0.164176	1.67105e-43	4.45469e-39	0.538	0.321	GMP
SCAF11	0.225528	1.77322e-43	4.72704e-39	0.782	0.561	GMP
GPN3	0.203722	1.83649e-43	4.89571e-39	0.485	0.266	GMP
ANP32E	0.230745	1.84223e-43	4.91103e-39	0.611	0.38	GMP
EHBP1L1	0.111274	2.03568e-43	5.42671e-39	0.164	0.042	GMP
FCHSD2	0.131505	2.09929e-43	5.59629e-39	0.302	0.132	GMP
EIF5A	0.214078	2.22128e-43	5.92149e-39	0.854	0.649	GMP
IRF2BP2	0.226732	2.34538e-43	6.25231e-39	0.73	0.504	GMP
PAK2	0.182008	2.66029e-43	7.09179e-39	0.645	0.417	GMP
ALYREF	0.169236	2.6756e-43	7.13261e-39	0.315	0.134	GMP
SMC1A	0.213828	3.03608e-43	8.09359e-39	0.501	0.28	GMP
TWF2	0.147977	3.68525e-43	9.82414e-39	0.565	0.349	GMP
TMEM258	0.227548	3.90571e-43	1.04118e-38	0.88	0.688	GMP
NDUFS8	0.184146	4.20535e-43	1.12106e-38	0.783	0.562	GMP
LARP4B	0.163517	4.31181e-43	1.14944e-38	0.313	0.133	GMP
DHTKD1	0.152863	4.72724e-43	1.26019e-38	0.263	0.1	GMP
DBNL	0.193355	4.76982e-43	1.27154e-38	0.554	0.328	GMP
MRPL51	0.209978	5.11801e-43	1.36436e-38	0.88	0.684	GMP
TMEM165	0.153654	5.43511e-43	1.44889e-38	0.42	0.221	GMP
MAGOHB	0.180798	6.13976e-43	1.63674e-38	0.478	0.263	GMP
ANP32A	0.228424	7.53505e-43	2.00869e-38	0.785	0.57	GMP
NDUFA1	0.214265	7.54227e-43	2.01062e-38	0.822	0.609	GMP
SUN2	0.135701	7.58845e-43	2.02293e-38	0.294	0.128	GMP
RAB5IF	0.135276	8.60102e-43	2.29286e-38	0.213	0.069	GMP
MRPL20	0.212536	9.07659e-43	2.41964e-38	0.802	0.586	GMP
FAM49B	0.194962	1.16336e-42	3.10127e-38	0.569	0.343	GMP
BAZ1B	0.206664	1.19716e-42	3.19139e-38	0.452	0.24	GMP
EZR	0.145201	1.20285e-42	3.20656e-38	0.446	0.242	GMP
ZMYM4	0.163815	1.24296e-42	3.31347e-38	0.368	0.176	GMP
GNG5	0.250865	1.66531e-42	4.43938e-38	0.879	0.717	GMP
GANAB	0.117164	1.73796e-42	4.63307e-38	0.485	0.287	GMP
MYCBP2	0.237311	1.79155e-42	4.77592e-38	0.666	0.439	GMP
GLRX5	0.1202	1.87544e-42	4.99954e-38	0.368	0.193	GMP
CARS2	0.160031	2.01345e-42	5.36744e-38	0.334	0.15	GMP
NOP58	0.18656	2.02955e-42	5.41037e-38	0.708	0.483	GMP
NBDY	0.134072	2.08368e-42	5.55468e-38	0.401	0.216	GMP
PFKL	0.170489	2.31031e-42	6.15883e-38	0.503	0.288	GMP
SMCHD1	0.225687	2.63879e-42	7.03448e-38	0.44	0.23	GMP
GSPT1	0.147661	2.87103e-42	7.65359e-38	0.488	0.283	GMP
NORAD	0.174543	3.11423e-42	8.30192e-38	0.359	0.174	GMP
FKBP5	0.223475	3.98829e-42	1.0632e-37	0.573	0.348	GMP
NAAA	0.120042	4.30579e-42	1.14784e-37	0.296	0.132	GMP
RCN2	0.160254	4.34288e-42	1.15773e-37	0.406	0.21	GMP
WARS	0.140313	5.03065e-42	1.34107e-37	0.235	0.083	GMP
POLE3	0.194892	5.90876e-42	1.57516e-37	0.613	0.387	GMP
EIF3K	0.194702	6.01692e-42	1.60399e-37	0.99	0.95	GMP
MMP24OS	0.132911	6.05256e-42	1.61349e-37	0.296	0.13	GMP
SF3B3	0.156062	6.54029e-42	1.74351e-37	0.394	0.199	GMP
SUGP2	0.195972	7.50174e-42	1.99981e-37	0.43	0.223	GMP
TMIGD2	0.11409	7.83021e-42	2.08738e-37	0.335	0.165	GMP
CSE1L	0.181818	1.03403e-41	2.75653e-37	0.369	0.176	GMP
MRPL11	0.180128	1.05102e-41	2.8018e-37	0.768	0.55	GMP
DNAJC10	0.166592	1.14353e-41	3.04842e-37	0.349	0.164	GMP
KHDRBS1	0.195804	1.17634e-41	3.1359e-37	0.753	0.532	GMP
CRLS1	0.139797	1.19309e-41	3.18054e-37	0.329	0.151	GMP
NIT2	0.172917	1.23029e-41	3.2797e-37	0.576	0.355	GMP
AGPAT2	0.121444	1.31238e-41	3.49855e-37	0.485	0.289	GMP
PSMA5	0.211559	1.31773e-41	3.51281e-37	0.801	0.589	GMP
PA2G4	0.211614	1.40071e-41	3.73402e-37	0.894	0.712	GMP
KDM2B	0.123137	1.43195e-41	3.8173e-37	0.234	0.085	GMP
RCC2	0.171371	1.43803e-41	3.83349e-37	0.503	0.289	GMP
BRCA2	0.188125	1.56085e-41	4.16093e-37	0.33	0.148	GMP
LTC4S	0.116669	1.76065e-41	4.69353e-37	0.216	0.079	GMP
TMEM263	0.111607	1.76381e-41	4.70196e-37	0.314	0.151	GMP
TFDP1	0.169318	2.86476e-41	7.63687e-37	0.36	0.17	GMP
HNRNPA3	0.243366	3.3588e-41	8.95389e-37	0.928	0.814	GMP
ARID1B	0.202673	3.53804e-41	9.43172e-37	0.562	0.341	GMP
MAPK1	0.134932	3.54393e-41	9.44742e-37	0.32	0.145	GMP
CCT5	0.2101	3.54878e-41	9.46033e-37	0.786	0.572	GMP
CBX5	0.235021	3.75331e-41	1.00056e-36	0.613	0.389	GMP
TRIM44	0.172281	3.84696e-41	1.02552e-36	0.5	0.289	GMP
SPART	0.186114	3.86856e-41	1.03128e-36	0.355	0.169	GMP
TOP2A	0.359838	4.23451e-41	1.12884e-36	0.335	0.152	GMP
CAPZA1	0.186235	4.46388e-41	1.18998e-36	0.646	0.421	GMP
MRPS26	0.15742	5.25189e-41	1.40005e-36	0.627	0.41	GMP
LRRFIP1	0.231389	5.74612e-41	1.5318e-36	0.847	0.658	GMP
IPO5	0.196387	6.14316e-41	1.63764e-36	0.473	0.262	GMP
DDX21	0.196068	6.45909e-41	1.72186e-36	0.712	0.49	GMP
DOCK5	0.158328	6.9198e-41	1.84468e-36	0.284	0.118	GMP
C15orf61	0.157266	8.51207e-41	2.26915e-36	0.395	0.202	GMP
POLD3	0.151118	8.80239e-41	2.34654e-36	0.323	0.145	GMP
M6PR	0.206649	9.34543e-41	2.4913e-36	0.659	0.434	GMP
ZBTB33	0.115845	9.65886e-41	2.57486e-36	0.206	0.069	GMP
PTRHD1	0.161988	1.29181e-40	3.4437e-36	0.742	0.527	GMP
NANS	0.186939	1.33503e-40	3.55891e-36	0.592	0.371	GMP
LTB4R	0.110183	1.61366e-40	4.30169e-36	0.146	0.036	GMP
MRPL57	0.216311	1.70231e-40	4.53802e-36	0.886	0.721	GMP
PTGER4	0.105877	1.82714e-40	4.87079e-36	0.248	0.11	GMP
GINS2	0.171265	2.07133e-40	5.52176e-36	0.409	0.213	GMP
RBX1	0.181719	2.10861e-40	5.62114e-36	0.889	0.702	GMP
MRPL17	0.184878	2.13419e-40	5.68933e-36	0.481	0.27	GMP
IRAK1	0.135544	2.4535e-40	6.54055e-36	0.295	0.127	GMP
CENPB	0.13	2.93961e-40	7.8364e-36	0.177	0.052	GMP
VPS35	0.207564	3.04132e-40	8.10755e-36	0.673	0.45	GMP
MTRNR2L12	0.255055	3.05536e-40	8.14498e-36	0.928	0.786	GMP
CBX3	0.121542	3.2522e-40	8.66972e-36	0.748	0.546	GMP
MAFG	0.154396	3.25367e-40	8.67363e-36	0.295	0.127	GMP
BARD1	0.156738	3.65165e-40	9.73458e-36	0.364	0.177	GMP
CLUH	0.136889	3.66771e-40	9.77739e-36	0.218	0.076	GMP
ARF3	0.134717	3.89137e-40	1.03736e-35	0.45	0.257	GMP
ETHE1	0.147771	4.99639e-40	1.33194e-35	0.586	0.376	GMP
KIAA0100	0.149791	5.13708e-40	1.36944e-35	0.262	0.103	GMP
EIF5B	0.190079	5.22334e-40	1.39244e-35	0.674	0.453	GMP
GPX4	0.187539	5.41397e-40	1.44326e-35	0.958	0.827	GMP
EBNA1BP2	0.138128	5.46099e-40	1.45579e-35	0.631	0.425	GMP
SMIM30	0.146468	5.47705e-40	1.46007e-35	0.309	0.14	GMP
MRPL23	0.181945	5.83527e-40	1.55557e-35	0.429	0.227	GMP
ILF3	0.173724	8.28514e-40	2.20865e-35	0.713	0.496	GMP
ENTR1	0.104899	8.33378e-40	2.22162e-35	0.151	0.038	GMP
MCUB	0.13421	8.51768e-40	2.27064e-35	0.259	0.104	GMP
FBXO38	0.113428	1.05706e-39	2.8179e-35	0.188	0.059	GMP
RPN2	0.234757	1.28768e-39	3.43269e-35	0.793	0.592	GMP
BRCA1	0.207247	1.67887e-39	4.47553e-35	0.346	0.166	GMP
EFTUD2	0.158849	1.72916e-39	4.60959e-35	0.375	0.186	GMP
MED13L	0.188068	1.78843e-39	4.76758e-35	0.452	0.248	GMP
GMDS	0.123397	1.95591e-39	5.21407e-35	0.263	0.108	GMP
SP110	0.101319	2.24406e-39	5.98222e-35	0.382	0.212	GMP
GLA	0.163884	2.386e-39	6.3606e-35	0.335	0.155	GMP
C1orf54	0.11288	2.83691e-39	7.56265e-35	0.208	0.077	GMP
ATP13A1	0.116225	2.97191e-39	7.92253e-35	0.202	0.067	GMP
HNRNPL	0.146529	3.00662e-39	8.01504e-35	0.407	0.218	GMP
EAF2	0.134542	3.89567e-39	1.03851e-34	0.652	0.445	GMP
CDV3	0.151956	3.90806e-39	1.04181e-34	0.383	0.196	GMP
DOCK8	0.150319	3.97549e-39	1.05979e-34	0.485	0.285	GMP
SMAP2	0.162654	4.0639e-39	1.08335e-34	0.424	0.227	GMP
ANAPC15	0.196863	4.17395e-39	1.11269e-34	0.505	0.294	GMP
PPIH	0.182309	4.46224e-39	1.18954e-34	0.576	0.359	GMP
SNRPD3	0.184114	4.60441e-39	1.22744e-34	0.835	0.635	GMP
ARRB2	0.122802	4.8975e-39	1.30558e-34	0.427	0.242	GMP
SNRNP70	0.186256	5.29114e-39	1.41051e-34	0.667	0.449	GMP
MFSD14C	0.145789	5.6993e-39	1.51932e-34	0.237	0.088	GMP
TRIP12	0.153608	5.72839e-39	1.52708e-34	0.362	0.179	GMP
ALDH3B1	0.120461	5.77799e-39	1.5403e-34	0.189	0.06	GMP
MTCH1	0.151779	5.99285e-39	1.59757e-34	0.387	0.2	GMP
CMTM7	0.115326	6.44617e-39	1.71842e-34	0.311	0.15	GMP
FKBP15	0.122931	6.52785e-39	1.74019e-34	0.221	0.08	GMP
SQOR	0.126664	7.24895e-39	1.93243e-34	0.176	0.053	GMP
SMG7	0.139637	9.55051e-39	2.54597e-34	0.297	0.131	GMP
TNKS2	0.124936	9.55516e-39	2.54721e-34	0.267	0.111	GMP
SSRP1	0.189247	1.01507e-38	2.70598e-34	0.641	0.424	GMP
RMI1	0.150154	1.04551e-38	2.78712e-34	0.279	0.116	GMP
USP7	0.134605	1.29994e-38	3.46538e-34	0.312	0.144	GMP
DNAJC15	0.158957	1.30522e-38	3.47945e-34	0.681	0.468	GMP
CELF1	0.171221	1.32656e-38	3.53635e-34	0.517	0.309	GMP
CLDN10	0.13552	1.4388e-38	3.83555e-34	0.333	0.164	GMP
CEP170	0.148431	1.52999e-38	4.07865e-34	0.425	0.233	GMP
TRAM1	0.174131	1.57551e-38	4.19998e-34	0.624	0.408	GMP
PPP1CA	0.225209	2.36354e-38	6.30073e-34	0.813	0.618	GMP
TET2	0.123167	2.71149e-38	7.22829e-34	0.282	0.127	GMP
U2SURP	0.155119	2.83627e-38	7.56092e-34	0.749	0.541	GMP
ERO1A	0.129059	2.95366e-38	7.87386e-34	0.258	0.105	GMP
BTAF1	0.137525	3.27196e-38	8.72238e-34	0.222	0.08	GMP
MYO9B	0.123845	3.30409e-38	8.80804e-34	0.286	0.128	GMP
TM9SF2	0.188584	3.6688e-38	9.78029e-34	0.465	0.263	GMP
OGA	0.120364	3.97325e-38	1.05919e-33	0.299	0.141	GMP
RPL22L1	0.231348	4.04592e-38	1.07856e-33	0.945	0.821	GMP
TUBB6	0.141344	4.23e-38	1.12763e-33	0.219	0.078	GMP
UQCC3	0.183342	5.44267e-38	1.45091e-33	0.49	0.284	GMP
METTL7A	0.160779	5.69033e-38	1.51693e-33	0.396	0.209	GMP
RPS6KA3	0.135729	5.74968e-38	1.53275e-33	0.341	0.168	GMP
TM7SF3	0.153559	5.81e-38	1.54883e-33	0.502	0.302	GMP
RNF130	0.138595	5.84403e-38	1.5579e-33	0.762	0.558	GMP
GLG1	0.148184	5.92027e-38	1.57822e-33	0.383	0.2	GMP
GGNBP2	0.134955	6.21952e-38	1.658e-33	0.62	0.414	GMP
CD63	0.209594	7.76463e-38	2.06989e-33	0.892	0.729	GMP
SRPRB	0.150645	7.78438e-38	2.07516e-33	0.447	0.251	GMP
ELAVL1	0.157882	8.66697e-38	2.31044e-33	0.42	0.228	GMP
NCAPD2	0.186224	8.83093e-38	2.35415e-33	0.282	0.123	GMP
ARID3A	0.120587	8.8997e-38	2.37248e-33	0.239	0.096	GMP
CHEK1	0.172401	9.53598e-38	2.5421e-33	0.381	0.194	GMP
LAMP2	0.125326	9.63533e-38	2.56859e-33	0.497	0.305	GMP
PCBP1	0.188195	1.03608e-37	2.76199e-33	0.843	0.65	GMP
COX6A1	0.217546	1.11045e-37	2.96025e-33	0.892	0.735	GMP
SEC16A	0.125669	1.11268e-37	2.96619e-33	0.224	0.082	GMP
MBD2	0.132833	1.12057e-37	2.98722e-33	0.234	0.088	GMP
ERLIN1	0.158785	1.12908e-37	3.0099e-33	0.36	0.18	GMP
MCM3	0.162407	1.14048e-37	3.04028e-33	0.562	0.357	GMP
PRDX4	0.14673	1.2383e-37	3.30107e-33	0.65	0.445	GMP
IMPDH1	0.142672	1.39099e-37	3.70811e-33	0.293	0.128	GMP
CD44	0.122735	1.56398e-37	4.16926e-33	0.807	0.608	GMP
MAP2K2	0.108664	1.74496e-37	4.65171e-33	0.292	0.135	GMP
MOB1A	0.166691	1.74548e-37	4.6531e-33	0.59	0.379	GMP
ACADVL	0.199649	1.90139e-37	5.06872e-33	0.57	0.357	GMP
CSNK2A1	0.149621	1.91752e-37	5.11174e-33	0.471	0.275	GMP
USP48	0.160928	2.05897e-37	5.48881e-33	0.488	0.287	GMP
TOMM70	0.137546	2.11724e-37	5.64414e-33	0.249	0.1	GMP
PRPF8	0.182252	2.49304e-37	6.64595e-33	0.494	0.289	GMP
TTC39C	0.119109	2.4933e-37	6.64663e-33	0.204	0.071	GMP
OGT	0.10137	2.55076e-37	6.79982e-33	0.392	0.224	GMP
SERBP1	0.213296	2.59154e-37	6.90852e-33	0.947	0.858	GMP
NDUFA6	0.202248	2.64623e-37	7.05431e-33	0.647	0.433	GMP
WASHC3	0.103152	2.73564e-37	7.29266e-33	0.288	0.138	GMP
MKI67	0.30791	2.81392e-37	7.50135e-33	0.313	0.143	GMP
CEP128	0.120971	3.02868e-37	8.07386e-33	0.172	0.052	GMP
CSK	0.109909	3.08512e-37	8.22431e-33	0.373	0.203	GMP
LSM4	0.221339	3.19979e-37	8.52999e-33	0.806	0.611	GMP
NR3C1	0.121928	3.38811e-37	9.03204e-33	0.454	0.263	GMP
DCXR	0.16385	3.63215e-37	9.68258e-33	0.612	0.404	GMP
CNDP2	0.144074	4.2262e-37	1.12662e-32	0.387	0.204	GMP
LARS	0.180332	4.44669e-37	1.1854e-32	0.654	0.442	GMP
FIBP	0.175386	4.44791e-37	1.18572e-32	0.69	0.478	GMP
COPS7A	0.127349	4.51194e-37	1.20279e-32	0.313	0.148	GMP
[truncated: 18,971 more rows]

## Sheet: MDS1
Gene	avg_logFC	p_value	p_value_adjusted	pct_expression_CellType	pct_expression_Rest	CellType
PRDX1	1.05172	0	0	0.999	0.965	HSC
CRHBP	0.990217	0	0	0.756	0.183	HSC
LST1	0.789786	0	0	0.956	0.775	HSC
TPT1	0.409386	0	0	1	1	HSC
IFI44L	0.778618	0	3.5511e-305	0.953	0.785	HSC
KIAA0125	0.748364	5.50743e-308	1.07758e-303	0.98	0.82	HSC
LAPTM5	0.619656	1.21437e-300	2.37604e-296	0.98	0.904	HSC
HOPX	0.762723	2.59722e-296	5.08172e-292	0.939	0.532	HSC
RP11-598F7.3	0.607557	2.8096e-295	5.49726e-291	0.63	0.182	HSC
HLA-E	0.636924	2.97332e-282	5.81759e-278	0.977	0.88	HSC
CD164	0.592105	1.33459e-271	2.61125e-267	0.91	0.76	HSC
EIF4A2	0.567449	1.55916e-264	3.05065e-260	0.973	0.892	HSC
SNHG7	0.639351	3.46563e-256	6.78086e-252	0.956	0.89	HSC
CD37	0.557702	4.19616e-249	8.21021e-245	0.97	0.903	HSC
SYPL1	0.520617	1.94219e-245	3.8001e-241	0.878	0.745	HSC
BST2	0.548802	6.18463e-244	1.21008e-239	0.994	0.958	HSC
PTPRC	0.516454	1.01427e-239	1.98452e-235	0.728	0.542	HSC
GNG11	0.612007	2.35059e-236	4.59917e-232	0.74	0.355	HSC
CLEC9A	0.49951	2.47183e-231	4.83638e-227	0.535	0.176	HSC
SELL	0.707374	1.31931e-230	2.58136e-226	0.965	0.692	HSC
EIF3E	0.468797	5.94549e-228	1.16329e-223	0.999	0.993	HSC
CD52	0.688171	1.32127e-226	2.5852e-222	0.904	0.569	HSC
MLLT3	0.423479	5.91001e-208	1.15635e-203	0.626	0.444	HSC
TM4SF1	0.49403	2.7626e-200	5.40531e-196	0.572	0.297	HSC
IFI16	0.537526	3.88603e-199	7.6034e-195	0.923	0.784	HSC
HLA-DRA	0.614159	1.06333e-196	2.08051e-192	0.999	0.94	HSC
SOCS2	0.4566	6.68074e-194	1.30715e-189	0.713	0.518	HSC
NACA	0.272847	9.66756e-188	1.89156e-183	1	1	HSC
ICAM3	0.489565	9.63284e-177	1.88476e-172	0.943	0.829	HSC
HLA-DPA1	0.540843	5.23216e-174	1.02372e-169	0.995	0.909	HSC
MAGED2	0.348846	5.52852e-166	1.08171e-161	0.654	0.574	HSC
ZFAS1	0.458475	7.52166e-160	1.47169e-155	0.976	0.967	HSC
C6orf48	0.41549	4.0129e-159	7.85163e-155	0.999	0.991	HSC
HEMGN	0.506844	1.10442e-157	2.16092e-153	0.63	0.275	HSC
AVP	0.366573	1.26214e-156	2.4695e-152	0.321	0.057	HSC
GIMAP1	0.304246	2.99138e-154	5.85293e-150	0.321	0.103	HSC
TXNIP	0.487318	8.08027e-154	1.58098e-149	0.852	0.758	HSC
HLA-DPB1	0.507013	1.59339e-152	3.11763e-148	0.995	0.904	HSC
CD74	0.503356	3.4849e-148	6.81855e-144	1	0.966	HSC
LAPTM4B	0.438306	7.78879e-145	1.52395e-140	0.83	0.721	HSC
ERICH1	0.280723	8.15019e-143	1.59467e-138	0.556	0.511	HSC
VAMP2	0.319823	1.52598e-141	2.98574e-137	0.739	0.703	HSC
EPB41L4A-AS1	0.374314	1.98346e-141	3.88084e-137	0.845	0.798	HSC
MALAT1	0.492495	4.60858e-140	9.01715e-136	0.999	1	HSC
IQGAP2	0.351208	6.7915e-140	1.32883e-135	0.69	0.612	HSC
GBP4	0.355167	3.85057e-138	7.53403e-134	0.491	0.259	HSC
RAB13	0.294094	1.33109e-136	2.60442e-132	0.681	0.658	HSC
HOXA9	0.255917	1.61596e-135	3.16179e-131	0.446	0.378	HSC
RPL5	0.264614	1.6454e-133	3.21939e-129	1	1	HSC
SSBP2	0.319379	6.23216e-132	1.21939e-127	0.604	0.49	HSC
MDK	0.52339	9.12061e-132	1.78454e-127	0.717	0.431	HSC
AKR1A1	0.364882	8.60662e-130	1.68397e-125	0.885	0.856	HSC
MYCT1	0.315098	1.40617e-127	2.75132e-123	0.428	0.243	HSC
GIMAP7	0.293985	1.49649e-127	2.92803e-123	0.284	0.106	HSC
IL18	0.289687	1.57002e-127	3.0719e-123	0.507	0.408	HSC
LAPTM4A	0.313697	7.7127e-127	1.50907e-122	0.772	0.727	HSC
CD53	0.399094	1.20265e-126	2.35311e-122	0.805	0.684	HSC
HLA-DRB1	0.449475	1.68281e-126	3.29258e-122	0.993	0.921	HSC
GUCY1A3	0.261177	4.89923e-126	9.58583e-122	0.399	0.258	HSC
BIN1	0.362736	1.91924e-124	3.75518e-120	0.573	0.36	HSC
CD34	0.375519	3.67621e-124	7.19287e-120	0.735	0.609	HSC
TAOK3	0.35592	4.10838e-124	8.03846e-120	0.778	0.727	HSC
EFNA1	0.271559	1.82107e-122	3.5631e-118	0.298	0.086	HSC
SNHG8	0.362113	3.25839e-122	6.37537e-118	0.983	0.978	HSC
KRT18	0.384176	4.9728e-119	9.72977e-115	0.716	0.573	HSC
ADAM28	0.261022	3.12328e-118	6.111e-114	0.388	0.261	HSC
ARHGDIB	0.360174	4.36241e-118	8.53549e-114	0.992	0.965	HSC
RCSD1	0.342109	1.40188e-117	2.74292e-113	0.592	0.435	HSC
PNISR	0.355045	1.27978e-114	2.50402e-110	0.964	0.952	HSC
EEF2	0.287222	1.28558e-113	2.51537e-109	1	0.997	HSC
MSI2	0.276375	1.45825e-113	2.85322e-109	0.587	0.555	HSC
LTA4H	0.254237	5.36502e-113	1.04972e-108	0.674	0.686	HSC
NFKBIA	0.351145	1.31961e-112	2.58194e-108	0.669	0.607	HSC
HSD17B11	0.365647	2.01233e-112	3.93733e-108	0.911	0.86	HSC
EVI2B	0.396366	4.72167e-112	9.23841e-108	0.651	0.394	HSC
MBOAT7	0.321569	1.45378e-110	2.84446e-106	0.628	0.498	HSC
PTTG1IP	0.286815	2.28332e-110	4.46755e-106	0.626	0.546	HSC
MEG3	0.372095	2.81303e-110	5.50398e-106	0.291	0.067	HSC
TAF7	0.267089	4.90333e-110	9.59385e-106	0.767	0.79	HSC
CLEC2B	0.288617	6.29376e-109	1.23144e-104	0.612	0.527	HSC
CARD19	0.261614	1.52386e-108	2.98159e-104	0.576	0.529	HSC
FNBP1	0.28517	3.19759e-108	6.2564e-104	0.626	0.553	HSC
GMFG	0.336836	6.98535e-108	1.36675e-103	0.997	0.985	HSC
BTG2	0.276723	1.85428e-107	3.62809e-103	0.309	0.114	HSC
HIST3H2A	0.461293	1.18226e-106	2.31321e-102	0.665	0.474	HSC
HLA-DRB5	0.401767	4.95854e-102	9.70188e-98	0.918	0.806	HSC
ERG	0.271458	5.16396e-102	1.01038e-97	0.487	0.371	HSC
CIRBP	0.33087	9.22419e-102	1.8048e-97	0.955	0.94	HSC
FAM83A	0.282172	1.11063e-101	2.17306e-97	0.392	0.25	HSC
ANXA5	0.255778	7.61913e-100	1.49076e-95	0.438	0.328	HSC
HHEX	0.296707	1.01984e-99	1.99542e-95	0.754	0.723	HSC
FXYD5	0.31433	1.45765e-99	2.85204e-95	0.991	0.981	HSC
ITM2B	0.322128	4.78143e-99	9.35535e-95	0.947	0.929	HSC
HIST1H2AC	0.395865	1.53833e-97	3.0099e-93	0.295	0.079	HSC
RARRES3	0.271887	9.49688e-97	1.85816e-92	0.501	0.389	HSC
ATP1B1	0.266486	3.01707e-96	5.9032e-92	0.429	0.305	HSC
SOCS3	0.317982	5.22764e-96	1.02284e-91	0.299	0.149	HSC
DDAH2	0.327827	5.63763e-96	1.10306e-91	0.704	0.605	HSC
H1F0	0.382532	7.022e-96	1.37393e-91	0.604	0.503	HSC
TMEM173	0.285666	1.37226e-95	2.68497e-91	0.771	0.743	HSC
TNFSF10	0.256973	5.62888e-94	1.10135e-89	0.429	0.307	HSC
ACAP1	0.257246	6.74704e-94	1.32013e-89	0.658	0.629	HSC
CELF2	0.278404	4.17057e-92	8.16015e-88	0.652	0.577	HSC
BEX2	0.292494	9.67055e-92	1.89214e-87	0.733	0.659	HSC
GPSM3	0.262022	5.14071e-91	1.00583e-86	0.735	0.731	HSC
SEPT6	0.315082	4.04711e-90	7.91857e-86	0.902	0.862	HSC
ANKRD28	0.272595	8.07388e-90	1.57973e-85	0.582	0.539	HSC
CAP1	0.259598	1.76472e-88	3.45284e-84	0.809	0.808	HSC
CTSS	0.264164	5.38078e-87	1.0528e-82	0.548	0.451	HSC
EIF3D	0.280985	5.66165e-87	1.10776e-82	0.924	0.923	HSC
IFITM3	0.365666	6.34944e-87	1.24233e-82	0.923	0.806	HSC
HIST2H2BE	0.257145	1.95726e-85	3.82957e-81	0.234	0.066	HSC
COMMD6	0.26759	1.82767e-81	3.57602e-77	0.991	0.994	HSC
NFIB	0.252035	3.97925e-81	7.78581e-77	0.296	0.138	HSC
SRSF5	0.283186	5.22674e-81	1.02266e-76	0.981	0.975	HSC
NPDC1	0.334607	5.7808e-81	1.13107e-76	0.737	0.594	HSC
SERPINB6	0.273616	8.17646e-81	1.59981e-76	0.771	0.721	HSC
SPINK2	0.258434	5.38834e-80	1.05428e-75	0.932	0.666	HSC
ST13	0.268885	1.10564e-79	2.1633e-75	0.961	0.949	HSC
GLIPR1	0.355268	5.33839e-79	1.04451e-74	0.592	0.371	HSC
TNFRSF1A	0.263066	1.57384e-73	3.07938e-69	0.725	0.646	HSC
ALDH1A1	0.313755	4.17262e-73	8.16415e-69	0.685	0.503	HSC
C1orf54	0.26324	7.82887e-73	1.5318e-68	0.593	0.501	HSC
XBP1	0.329247	3.33952e-72	6.53411e-68	0.929	0.889	HSC
SEPP1	0.277482	5.86366e-72	1.14728e-67	0.567	0.479	HSC
EGFL7	0.30874	1.48029e-71	2.89633e-67	0.935	0.872	HSC
AIF1	0.30116	9.13025e-71	1.78642e-66	0.988	0.937	HSC
HLA-DMA	0.285778	2.55486e-67	4.99884e-63	0.834	0.759	HSC
CCNI	0.250787	1.4266e-66	2.79128e-62	0.98	0.982	HSC
H2AFY	0.252515	1.32881e-63	2.59995e-59	0.994	0.982	HSC
HLA-DQB1	0.304826	2.29689e-62	4.4941e-58	0.749	0.601	HSC
MX1	0.30308	2.56358e-62	5.01589e-58	0.601	0.498	HSC
MRPL16	0.253226	5.96198e-62	1.16652e-57	0.838	0.83	HSC
IL1B	0.294944	1.00797e-56	1.9722e-52	0.717	0.584	HSC
HSPB1	0.265179	1.57289e-52	3.07753e-48	0.977	0.963	HSC
CD69	0.257391	1.78228e-49	3.4872e-45	0.382	0.306	HSC
CSF3R	0.306414	1.43113e-47	2.80015e-43	0.755	0.582	HSC
FOS	0.327933	1.48707e-40	2.90959e-36	0.488	0.466	HSC
RP11-301G19.1	0.254771	1.19383e-37	2.33586e-33	0.141	0.033	HSC
BEX1	0.25448	4.0888e-35	8.00015e-31	0.709	0.611	HSC
SPINK2	0.834654	0	0	0.979	0.528	LMPP
AC002454.1	0.666108	0	0	0.841	0.54	LMPP
SMIM24	0.594895	0	0	0.945	0.514	LMPP
SELL	0.557123	0	0	0.968	0.577	LMPP
MGST1	0.53579	0	0	0.984	0.889	LMPP
IGLL1	0.509438	0	0	0.983	0.815	LMPP
C1orf228	0.492934	0	0	0.99	0.827	LMPP
HOPX	0.48782	0	0	0.907	0.383	LMPP
CSF3R	0.473491	0	0	0.895	0.428	LMPP
CD52	0.456448	0	0	0.873	0.449	LMPP
IGFBP7	0.447509	0	0	0.966	0.81	LMPP
CD99	0.429563	0	0	0.976	0.855	LMPP
NAP1L1	0.393484	0	0	1	0.992	LMPP
GAPDH	0.389023	0	0	1	1	LMPP
MZB1	0.384229	0	0	0.819	0.401	LMPP
CD74	0.38323	0	0	1	0.951	LMPP
HLA-DRA	0.355571	0	0	0.999	0.915	LMPP
HLA-DPA1	0.355077	0	0	0.998	0.871	LMPP
HLA-DPB1	0.329242	4.23426e-302	8.28475e-298	0.998	0.864	LMPP
EGFL7	0.392892	1.27841e-292	2.50133e-288	0.973	0.824	LMPP
HLA-DRB1	0.337287	2.15682e-281	4.22004e-277	0.993	0.891	LMPP
NPDC1	0.36873	3.46379e-281	6.77726e-277	0.834	0.477	LMPP
H2AFY	0.319455	5.59812e-281	1.09533e-276	0.998	0.975	LMPP
ENO1	0.369178	9.12558e-280	1.78551e-275	0.998	0.97	LMPP
TNFSF13B	0.366871	2.69127e-268	5.26574e-264	0.951	0.799	LMPP
PKM	0.394587	4.95021e-265	9.68558e-261	0.914	0.624	LMPP
ICAM3	0.363755	5.66542e-264	1.1085e-259	0.95	0.777	LMPP
ITM2C	0.334916	1.55362e-260	3.03982e-256	0.871	0.552	LMPP
PRAM1	0.307093	1.52142e-257	2.97682e-253	0.636	0.262	LMPP
HLA-DRB5	0.313428	6.20051e-245	1.21319e-240	0.959	0.735	LMPP
PHGDH	0.371232	2.96271e-238	5.79684e-234	0.883	0.664	LMPP
XBP1	0.354629	5.78165e-234	1.13124e-229	0.975	0.846	LMPP
GLIPR1	0.307851	2.78208e-233	5.44341e-229	0.619	0.263	LMPP
HLA-A	0.252025	3.32745e-232	6.51048e-228	1	0.999	LMPP
LAT2	0.270995	8.65284e-224	1.69301e-219	0.77	0.423	LMPP
IFITM3	0.346371	5.47994e-223	1.07221e-218	0.944	0.746	LMPP
KIAA0125	0.396892	2.85039e-214	5.57707e-210	0.943	0.776	LMPP
CDCA7	0.328778	1.0224e-209	2.00043e-205	0.811	0.59	LMPP
PRDX1	0.350255	1.2353e-209	2.417e-205	0.995	0.954	LMPP
MDK	0.331934	2.36909e-206	4.63537e-202	0.675	0.337	LMPP
AIF1	0.25236	1.11775e-200	2.18698e-196	0.998	0.911	LMPP
NUCB2	0.267967	1.24119e-192	2.42852e-188	0.996	0.978	LMPP
TRBC2	0.27138	1.51544e-186	2.96511e-182	0.51	0.207	LMPP
TNFRSF1A	0.290572	8.25366e-182	1.61491e-177	0.812	0.561	LMPP
SPARC	0.251607	3.00325e-174	5.87617e-170	0.52	0.231	LMPP
RAB32	0.25358	4.64156e-172	9.08168e-168	0.77	0.469	LMPP
HSH2D	0.272441	5.71699e-163	1.11859e-158	0.732	0.467	LMPP
IFI44L	0.284444	5.10287e-153	9.98428e-149	0.921	0.735	LMPP
IFITM2	0.260348	1.66114e-144	3.25018e-140	0.978	0.917	LMPP
SEPP1	0.258648	1.36568e-140	2.67209e-136	0.657	0.389	LMPP
BEX1	0.33983	3.42337e-138	6.69817e-134	0.76	0.541	LMPP
IFI6	0.279791	2.12031e-128	4.1486e-124	0.936	0.809	LMPP
APLP2	0.265347	1.98189e-109	3.87776e-105	0.918	0.828	LMPP
ARL6IP1	1.17343	4.64985e-172	9.0979e-168	0.958	0.514	Cycling_LMPP
PTTG1	1.301	1.46468e-159	2.86579e-155	1	0.628	Cycling_LMPP
CENPF	1.57265	5.59865e-154	1.09543e-149	1	0.476	Cycling_LMPP
TUBB4B	1.42264	1.2239e-144	2.39468e-140	0.966	0.631	Cycling_LMPP
CCNB1	1.1183	6.1357e-123	1.20051e-118	0.916	0.242	Cycling_LMPP
KPNA2	1.02262	3.6229e-117	7.08857e-113	0.891	0.345	Cycling_LMPP
CKS2	1.06438	2.55417e-116	4.99748e-112	1	0.781	Cycling_LMPP
CCNB2	1.00205	6.57362e-116	1.28619e-111	0.924	0.306	Cycling_LMPP
TOP2A	1.25312	1.221e-115	2.389e-111	0.857	0.26	Cycling_LMPP
CDKN3	1.02743	3.02817e-115	5.92492e-111	0.933	0.342	Cycling_LMPP
UBE2C	1.41055	9.80276e-115	1.91801e-110	0.891	0.293	Cycling_LMPP
ASPM	1.05909	6.58842e-113	1.28909e-108	0.899	0.256	Cycling_LMPP
CDC20	1.18571	2.96022e-108	5.79197e-104	0.924	0.259	Cycling_LMPP
BIRC5	1.08761	4.85448e-108	9.49828e-104	0.992	0.358	Cycling_LMPP
NUSAP1	0.998033	5.46533e-105	1.06935e-100	0.933	0.314	Cycling_LMPP
HMGB2	1.2086	2.7541e-94	5.38867e-90	1	0.886	Cycling_LMPP
TUBA1C	0.867015	5.19179e-91	1.01583e-86	0.891	0.548	Cycling_LMPP
MKI67	1.09969	6.33651e-86	1.2398e-81	0.916	0.28	Cycling_LMPP
HMMR	0.936171	1.28787e-85	2.51984e-81	0.857	0.172	Cycling_LMPP
PLK1	0.879914	2.66471e-85	5.21377e-81	0.815	0.122	Cycling_LMPP
CENPE	0.820734	1.84258e-83	3.60519e-79	0.79	0.166	Cycling_LMPP
TPX2	0.800807	1.69319e-81	3.3129e-77	0.857	0.267	Cycling_LMPP
TROAP	0.606897	6.91704e-81	1.35339e-76	0.773	0.138	Cycling_LMPP
CKAP2	0.703983	3.5877e-78	7.01969e-74	0.857	0.416	Cycling_LMPP
CENPA	0.679561	1.20368e-74	2.35512e-70	0.773	0.101	Cycling_LMPP
NUCKS1	0.812903	9.05405e-71	1.77152e-66	0.992	0.946	Cycling_LMPP
KIF2C	0.569832	1.98878e-69	3.89124e-65	0.782	0.164	Cycling_LMPP
CDCA8	0.635964	1.78395e-68	3.49047e-64	0.824	0.219	Cycling_LMPP
AURKB	0.795056	8.8098e-66	1.72373e-61	0.832	0.224	Cycling_LMPP
HSP90B1	0.82675	1.36004e-63	2.66106e-59	1	0.805	Cycling_LMPP
NUF2	0.617169	2.08271e-63	4.07504e-59	0.756	0.221	Cycling_LMPP
GTSE1	0.604926	3.82904e-63	7.4919e-59	0.782	0.155	Cycling_LMPP
AURKA	0.641972	5.59293e-61	1.09431e-56	0.782	0.193	Cycling_LMPP
CDK1	0.678568	7.52712e-60	1.47276e-55	0.79	0.273	Cycling_LMPP
PSRC1	0.422998	3.01371e-59	5.89663e-55	0.529	0.035	Cycling_LMPP
HMGB3	0.626378	4.02377e-59	7.87291e-55	0.916	0.438	Cycling_LMPP
NEK2	0.490072	8.28618e-57	1.62127e-52	0.664	0.121	Cycling_LMPP
HMGN2	0.784092	1.83349e-55	3.5874e-51	1	0.869	Cycling_LMPP
BUB3	0.592066	2.96318e-55	5.79776e-51	0.882	0.593	Cycling_LMPP
CKS1B	0.7744	4.67995e-55	9.1568e-51	0.983	0.786	Cycling_LMPP
CDC25B	0.427008	4.75112e-55	9.29605e-51	0.613	0.075	Cycling_LMPP
CALM2	0.635671	5.21658e-55	1.02068e-50	0.992	0.976	Cycling_LMPP
CCNA2	0.510791	3.16657e-54	6.1957e-50	0.765	0.18	Cycling_LMPP
CKAP2L	0.553149	5.36943e-49	1.05058e-44	0.714	0.222	Cycling_LMPP
KNSTRN	0.489515	7.56721e-49	1.4806e-44	0.697	0.197	Cycling_LMPP
HN1	0.636857	1.49205e-48	2.91934e-44	0.916	0.615	Cycling_LMPP
RNF26	0.447724	2.88199e-48	5.63891e-44	0.815	0.246	Cycling_LMPP
TUBA1B	0.790446	4.8278e-48	9.44607e-44	1	0.988	Cycling_LMPP
SMC4	0.627328	5.71721e-48	1.11863e-43	0.992	0.758	Cycling_LMPP
DLGAP5	0.465646	8.31529e-48	1.62697e-43	0.647	0.124	Cycling_LMPP
KIF23	0.409516	3.09897e-47	6.06344e-43	0.588	0.104	Cycling_LMPP
PRC1	0.564136	6.76111e-46	1.32288e-41	0.79	0.297	Cycling_LMPP
RAD21	0.553085	3.70309e-45	7.24547e-41	0.941	0.554	Cycling_LMPP
CD9	0.605679	2.553e-43	4.99521e-39	0.782	0.308	Cycling_LMPP
SGOL1	0.469431	1.46503e-42	2.86648e-38	0.739	0.273	Cycling_LMPP
DEPDC1	0.450388	3.54078e-42	6.9279e-38	0.597	0.148	Cycling_LMPP
CDCA3	0.464576	1.70489e-41	3.33578e-37	0.647	0.147	Cycling_LMPP
KIF20A	0.262532	2.20481e-41	4.31393e-37	0.437	0.037	Cycling_LMPP
HMGB1	0.599354	4.27389e-41	8.36229e-37	1	0.999	Cycling_LMPP
HLA-C	0.45965	2.36898e-40	4.63514e-36	1	1	Cycling_LMPP
TUBB	0.731245	4.06527e-40	7.95411e-36	0.992	0.96	Cycling_LMPP
HSPA5	0.713273	1.33336e-38	2.60885e-34	0.899	0.683	Cycling_LMPP
SGOL2	0.478434	1.80591e-38	3.53344e-34	0.765	0.311	Cycling_LMPP
TMEM71	0.417148	4.57928e-38	8.95981e-34	0.58	0.117	Cycling_LMPP
UBB	0.472656	9.70573e-38	1.89902e-33	1	0.998	Cycling_LMPP
CDCA2	0.341907	4.26311e-36	8.3412e-32	0.538	0.105	Cycling_LMPP
KIF20B	0.515193	4.33138e-36	8.47478e-32	0.832	0.402	Cycling_LMPP
GPSM2	0.456646	6.35564e-36	1.24354e-31	0.79	0.325	Cycling_LMPP
BUB1	0.320939	7.8736e-35	1.54055e-30	0.58	0.125	Cycling_LMPP
PHF19	0.456056	1.22997e-34	2.40655e-30	0.739	0.31	Cycling_LMPP
KIF14	0.304896	3.87464e-34	7.58112e-30	0.513	0.093	Cycling_LMPP
MXD3	0.539992	1.69064e-33	3.30791e-29	0.63	0.193	Cycling_LMPP
HNRNPA2B1	0.459782	1.88306e-33	3.6844e-29	1	0.977	Cycling_LMPP
UBC	0.52517	3.22147e-33	6.30312e-29	0.992	0.926	Cycling_LMPP
SPINK2	0.640783	9.99427e-33	1.95548e-28	1	0.691	Cycling_LMPP
ARPC2	0.457022	2.01637e-32	3.94522e-28	1	0.979	Cycling_LMPP
SELL	0.664424	2.7182e-32	5.31842e-28	0.983	0.719	Cycling_LMPP
KIF4A	0.285087	2.84002e-32	5.55678e-28	0.479	0.093	Cycling_LMPP
RBMX	0.470348	3.13708e-32	6.13802e-28	0.975	0.838	Cycling_LMPP
SFPQ	0.471914	2.1421e-31	4.19123e-27	0.958	0.865	Cycling_LMPP
HP1BP3	0.462914	1.1639e-30	2.27729e-26	0.824	0.434	Cycling_LMPP
KIFC1	0.313969	1.94461e-30	3.80482e-26	0.454	0.104	Cycling_LMPP
PRR11	0.309508	2.57844e-30	5.04497e-26	0.529	0.11	Cycling_LMPP
HLA-A	0.42484	8.31362e-30	1.62664e-25	1	1	Cycling_LMPP
TUBA1A	0.508071	1.75947e-29	3.44257e-25	0.899	0.541	Cycling_LMPP
HLA-B	0.340457	3.66438e-29	7.16972e-25	1	1	Cycling_LMPP
NDC80	0.346768	5.23255e-29	1.0238e-24	0.605	0.173	Cycling_LMPP
KIF22	0.414127	9.11419e-29	1.78328e-24	0.84	0.479	Cycling_LMPP
MAD2L1	0.447344	2.10354e-28	4.11579e-24	0.882	0.533	Cycling_LMPP
UBE2S	0.508644	2.73881e-28	5.35875e-24	0.866	0.448	Cycling_LMPP
XBP1	0.536165	2.76894e-28	5.41771e-24	0.983	0.893	Cycling_LMPP
HMG20B	0.412384	4.30277e-28	8.4188e-24	0.874	0.506	Cycling_LMPP
NCAPH	0.307975	6.0428e-28	1.18233e-23	0.563	0.165	Cycling_LMPP
ANP32B	0.412355	1.00322e-27	1.96289e-23	1	0.991	Cycling_LMPP
HJURP	0.276425	1.17247e-26	2.29406e-22	0.479	0.111	Cycling_LMPP
CASC5	0.305507	5.456e-26	1.06752e-21	0.504	0.137	Cycling_LMPP
IFI6	0.529203	7.08671e-26	1.38659e-21	0.992	0.854	Cycling_LMPP
HLA-DMA	0.475886	1.7228e-25	3.37084e-21	0.95	0.765	Cycling_LMPP
RACGAP1	0.263583	3.31095e-25	6.47821e-21	0.429	0.101	Cycling_LMPP
MIS18BP1	0.420576	4.07918e-25	7.98132e-21	0.882	0.575	Cycling_LMPP
HMGN3	0.365787	2.40383e-24	4.70333e-20	0.983	0.937	Cycling_LMPP
ANXA1	0.436438	2.84028e-24	5.55728e-20	0.992	0.87	Cycling_LMPP
IGLL1	0.689145	2.18983e-23	4.28462e-19	1	0.876	Cycling_LMPP
AKR1A1	0.423956	2.71677e-23	5.31563e-19	0.941	0.859	Cycling_LMPP
DDX39A	0.404213	2.77787e-23	5.43517e-19	0.916	0.717	Cycling_LMPP
CKAP5	0.325409	2.841e-23	5.5587e-19	0.63	0.233	Cycling_LMPP
DEPDC1B	0.265777	1.08927e-22	2.13126e-18	0.487	0.139	Cycling_LMPP
CD59	0.391308	1.56065e-22	3.05357e-18	0.941	0.701	Cycling_LMPP
TACC3	0.382998	2.67905e-22	5.24184e-18	0.773	0.462	Cycling_LMPP
HLA-DRB5	0.439457	3.02117e-22	5.91123e-18	0.992	0.816	Cycling_LMPP
DYNLL1	0.392994	3.72529e-22	7.2889e-18	0.992	0.975	Cycling_LMPP
CD99	0.439443	5.38803e-22	1.05422e-17	0.992	0.899	Cycling_LMPP
RAC2	0.38067	7.14619e-22	1.39822e-17	0.992	0.908	Cycling_LMPP
STMN1	0.479716	1.10299e-21	2.15812e-17	1	0.958	Cycling_LMPP
CD52	0.558448	1.11974e-21	2.19089e-17	0.908	0.603	Cycling_LMPP
TRBC2	0.389942	1.16772e-21	2.28477e-17	0.739	0.314	Cycling_LMPP
HNRNPH3	0.376666	1.2666e-21	2.47824e-17	0.958	0.736	Cycling_LMPP
EVI2B	0.440485	4.0194e-21	7.86436e-17	0.815	0.417	Cycling_LMPP
MANF	0.486171	8.46181e-21	1.65564e-16	0.866	0.623	Cycling_LMPP
SMC2	0.398142	1.23281e-20	2.41211e-16	0.924	0.612	Cycling_LMPP
TPM4	0.419106	2.32793e-20	4.55482e-16	0.79	0.446	Cycling_LMPP
H2AFX	0.333753	2.79231e-20	5.46343e-16	0.639	0.32	Cycling_LMPP
KIF15	0.253953	3.06499e-20	5.99696e-16	0.445	0.125	Cycling_LMPP
RAN	0.356123	9.7745e-20	1.91248e-15	1	0.992	Cycling_LMPP
CDK2AP2	0.374064	1.60545e-19	3.14123e-15	0.765	0.429	Cycling_LMPP
HOPX	0.473163	3.31177e-19	6.47982e-15	0.908	0.574	Cycling_LMPP
EGFL7	0.393657	1.21323e-18	2.37381e-14	0.992	0.878	Cycling_LMPP
EMC9	0.263477	1.91291e-18	3.74279e-14	0.521	0.17	Cycling_LMPP
PRDX1	0.488952	2.02042e-18	3.95316e-14	1	0.969	Cycling_LMPP
HSPA1A	0.314629	2.23861e-18	4.38006e-14	0.748	0.35	Cycling_LMPP
HLA-DRB1	0.404091	4.31534e-18	8.44339e-14	1	0.928	Cycling_LMPP
GAPT	0.277106	5.54536e-18	1.08501e-13	0.782	0.378	Cycling_LMPP
H2AFZ	0.40062	1.04296e-17	2.04066e-13	1	0.974	Cycling_LMPP
FAM26F	0.343573	1.10587e-17	2.16375e-13	0.95	0.767	Cycling_LMPP
PDIA6	0.360272	1.32198e-17	2.58659e-13	0.975	0.885	Cycling_LMPP
SMIM24	0.422607	1.46475e-17	2.86594e-13	0.95	0.671	Cycling_LMPP
HLA-DPA1	0.385662	1.66055e-17	3.24904e-13	1	0.917	Cycling_LMPP
DCTN3	0.330032	2.42503e-17	4.7448e-13	0.891	0.702	Cycling_LMPP
VAMP8	0.329604	3.94232e-17	7.71355e-13	0.983	0.989	Cycling_LMPP
B2M	0.260954	4.80573e-17	9.4029e-13	1	1	Cycling_LMPP
MZT1	0.299752	5.38517e-17	1.05366e-12	0.748	0.408	Cycling_LMPP
CENPW	0.352592	5.99923e-17	1.17381e-12	0.891	0.591	Cycling_LMPP
CCDC18	0.307464	6.92071e-17	1.35411e-12	0.681	0.33	Cycling_LMPP
KIAA0125	0.46725	8.07309e-17	1.57958e-12	0.966	0.836	Cycling_LMPP
HSD17B11	0.380524	8.64112e-17	1.69072e-12	0.983	0.864	Cycling_LMPP
MZB1	0.489974	9.54796e-17	1.86815e-12	0.882	0.552	Cycling_LMPP
H2AFY	0.327618	1.28807e-16	2.52024e-12	1	0.983	Cycling_LMPP
GGH	0.334758	1.99035e-16	3.89431e-12	0.882	0.593	Cycling_LMPP
TMSB4X	0.375216	3.04868e-16	5.96505e-12	1	0.987	Cycling_LMPP
C1orf228	0.381443	3.79652e-16	7.42827e-12	1	0.886	Cycling_LMPP
CEP70	0.290212	3.87008e-16	7.5722e-12	0.538	0.214	Cycling_LMPP
HLA-E	0.36812	7.36942e-16	1.4419e-11	0.975	0.89	Cycling_LMPP
HLA-DRA	0.395917	8.24776e-16	1.61376e-11	1	0.946	Cycling_LMPP
VPREB1	0.342765	1.14041e-15	2.23132e-11	0.429	0.122	Cycling_LMPP
DBF4	0.268207	1.19755e-15	2.34312e-11	0.697	0.35	Cycling_LMPP
CD34	0.296045	1.40047e-15	2.74017e-11	0.933	0.618	Cycling_LMPP
CAPG	0.318291	1.49409e-15	2.92334e-11	0.765	0.405	Cycling_LMPP
SPI1	0.330584	2.15018e-15	4.20704e-11	0.874	0.559	Cycling_LMPP
HNRNPK	0.313622	2.15804e-15	4.22241e-11	0.983	0.956	Cycling_LMPP
NUCB2	0.321205	2.34346e-15	4.58521e-11	1	0.984	Cycling_LMPP
HNRNPDL	0.319823	2.67892e-15	5.24158e-11	0.992	0.939	Cycling_LMPP
ARHGDIB	0.318979	3.67123e-15	7.18313e-11	1	0.968	Cycling_LMPP
PSMB8	0.323503	3.87866e-15	7.58898e-11	0.958	0.883	Cycling_LMPP
EVI2A	0.253932	5.78399e-15	1.1317e-10	0.513	0.181	Cycling_LMPP
CNTRL	0.327167	6.87808e-15	1.34577e-10	0.765	0.49	Cycling_LMPP
ILF2	0.298799	8.26561e-15	1.61725e-10	1	0.944	Cycling_LMPP
PDIA4	0.29747	9.81067e-15	1.91956e-10	0.765	0.436	Cycling_LMPP
LSM5	0.292366	1.65823e-14	3.24449e-10	0.975	0.868	Cycling_LMPP
ENO1	0.34792	2.05602e-14	4.02281e-10	1	0.98	Cycling_LMPP
WSB1	0.279504	2.15344e-14	4.21342e-10	0.79	0.451	Cycling_LMPP
HIST1H4C	0.580389	2.28829e-14	4.47727e-10	0.849	0.902	Cycling_LMPP
TPRKB	0.289961	2.5298e-14	4.94981e-10	0.95	0.78	Cycling_LMPP
NSFL1C	0.284666	3.41778e-14	6.68724e-10	0.874	0.601	Cycling_LMPP
LAT2	0.34742	3.42488e-14	6.70111e-10	0.857	0.548	Cycling_LMPP
PLIN3	0.289858	3.85036e-14	7.53361e-10	0.756	0.499	Cycling_LMPP
MAPKAPK3	0.316161	7.52782e-14	1.47289e-09	0.866	0.634	Cycling_LMPP
RHEB	0.289352	9.28862e-14	1.81741e-09	0.908	0.763	Cycling_LMPP
CD74	0.344306	9.35367e-14	1.83014e-09	1	0.969	Cycling_LMPP
SRSF3	0.266646	1.76142e-13	3.44638e-09	0.983	0.976	Cycling_LMPP
HLA-DPB1	0.316848	1.88056e-13	3.6795e-09	1	0.913	Cycling_LMPP
POLR1D	0.286543	3.18157e-13	6.22507e-09	0.992	0.925	Cycling_LMPP
BIN1	0.266944	3.69246e-13	7.22467e-09	0.723	0.379	Cycling_LMPP
UBE2E3	0.281082	4.56078e-13	8.92362e-09	0.891	0.666	Cycling_LMPP
IFITM3	0.310918	5.35668e-13	1.04809e-08	0.992	0.817	Cycling_LMPP
ARHGAP15	0.278101	5.43781e-13	1.06396e-08	0.899	0.652	Cycling_LMPP
CALR	0.355571	6.43526e-13	1.25912e-08	0.992	0.963	Cycling_LMPP
SEPT6	0.288328	6.80611e-13	1.33168e-08	0.983	0.865	Cycling_LMPP
GNG11	0.29773	8.09682e-13	1.58422e-08	0.731	0.393	Cycling_LMPP
VIM	0.336788	8.34722e-13	1.63322e-08	0.992	0.904	Cycling_LMPP
FDFT1	0.294469	9.89416e-13	1.93589e-08	0.832	0.657	Cycling_LMPP
GSDMD	0.277336	1.05601e-12	2.06619e-08	0.941	0.707	Cycling_LMPP
DNAJA1	0.305556	1.45034e-12	2.83774e-08	0.966	0.798	Cycling_LMPP
DCAF7	0.273366	1.79593e-12	3.51391e-08	0.832	0.574	Cycling_LMPP
HNRNPA3	0.286006	2.4691e-12	4.83104e-08	0.966	0.902	Cycling_LMPP
SERPING1	0.285546	3.04889e-12	5.96545e-08	0.832	0.574	Cycling_LMPP
HHEX	0.303808	5.0328e-12	9.84717e-08	0.916	0.724	Cycling_LMPP
ACTG1	0.27598	5.69327e-12	1.11394e-07	1	0.998	Cycling_LMPP
SRP9	0.270171	5.70633e-12	1.1165e-07	0.992	0.903	Cycling_LMPP
SERPINB6	0.27625	8.32916e-12	1.62968e-07	0.933	0.724	Cycling_LMPP
CTSS	0.277923	1.67924e-11	3.2856e-07	0.739	0.458	Cycling_LMPP
TCF4	0.290713	1.83649e-11	3.59328e-07	0.798	0.513	Cycling_LMPP
AIF1	0.276949	1.88368e-11	3.68561e-07	1	0.942	Cycling_LMPP
C1orf162	0.267902	1.97139e-11	3.85721e-07	0.739	0.435	Cycling_LMPP
ITM2B	0.252293	2.36584e-11	4.629e-07	1	0.93	Cycling_LMPP
LBR	0.259873	2.86601e-11	5.60763e-07	0.756	0.488	Cycling_LMPP
TMEM173	0.279597	5.95814e-11	1.16577e-06	0.924	0.744	Cycling_LMPP
TMED9	0.278253	6.09246e-11	1.19205e-06	0.941	0.853	Cycling_LMPP
MBOAT7	0.275695	1.65212e-10	3.23255e-06	0.773	0.509	Cycling_LMPP
EPSTI1	0.282073	4.80474e-10	9.40096e-06	0.891	0.703	Cycling_LMPP
IGFBP7	0.259249	8.22222e-10	1.60876e-05	0.975	0.867	Cycling_LMPP
HSPA8	0.316776	8.88601e-10	1.73864e-05	0.992	0.984	Cycling_LMPP
PHGDH	0.262944	1.58304e-09	3.09738e-05	0.924	0.743	Cycling_LMPP
VAMP5	0.267565	2.71878e-09	5.31957e-05	0.874	0.639	Cycling_LMPP
FKBP2	0.266123	4.196e-09	8.2099e-05	0.857	0.691	Cycling_LMPP
PTGES3	0.255604	8.31455e-09	0.000162683	0.975	0.908	Cycling_LMPP
CD53	0.250737	1.25409e-08	0.000245376	0.882	0.695	Cycling_LMPP
GYPC	0.255561	3.06668e-08	0.000600027	0.992	0.974	Cycling_LMPP
IFI44L	0.279036	5.32253e-08	0.00104141	0.941	0.802	Cycling_LMPP
SDF2L1	0.297292	2.37456e-07	0.00464607	0.807	0.615	Cycling_LMPP
PRTN3	3.41055	0	0	0.936	0.198	GMP1
ELANE	3.07395	0	0	0.971	0.226	GMP1
AZU1	2.51404	0	0	0.999	0.306	GMP1
MPO	2.18388	0	0	0.988	0.501	GMP1
CFD	1.60643	0	0	0.943	0.342	GMP1
CTSG	1.52353	0	0	0.916	0.249	GMP1
RNASE2	1.16835	0	0	0.92	0.254	GMP1
CST7	1.11906	0	0	0.805	0.119	GMP1
CLEC11A	0.874338	0	0	0.945	0.824	GMP1
SRGN	0.805368	0	0	0.992	0.907	GMP1
CALR	0.775279	0	0	0.997	0.959	GMP1
PRSS57	0.659085	0	0	1	0.978	GMP1
RNASE3	0.470079	0	0	0.469	0.022	GMP1
RPLP2	0.338791	0	0	1	1	GMP1
RPS19	0.335891	0	0	1	1	GMP1
RPS14	0.278229	0	0	1	1	GMP1
RPLP1	0.255109	0	0	1	1	GMP1
RPS16	0.257055	0	0	1	1	GMP1
CSTA	0.523438	6.78311e-305	1.32718e-300	0.581	0.073	GMP1
MS4A3	0.711552	4.33376e-301	8.47944e-297	0.774	0.198	GMP1
CEBPE	0.565906	6.51948e-296	1.2756e-291	0.458	0.035	GMP1
RPS28	0.281265	1.92174e-280	3.76007e-276	1	1	GMP1
IGLL1	0.810839	5.41159e-252	1.05883e-247	0.987	0.863	GMP1
RAB32	0.558575	3.36278e-230	6.57962e-226	0.905	0.538	GMP1
SDF2L1	0.617572	3.84185e-218	7.51696e-214	0.828	0.589	GMP1
RPS26	0.258083	2.7748e-208	5.42916e-204	1	1	GMP1
RASGRP2	0.480255	1.2348e-198	2.41601e-194	0.854	0.533	GMP1
SSR4	0.426323	5.30591e-195	1.03815e-190	0.992	0.967	GMP1
CYBA	0.518729	2.45369e-184	4.8009e-180	0.996	0.936	GMP1
MNDA	0.294326	7.33576e-181	1.43531e-176	0.294	0.019	GMP1
CEBPA	0.365737	6.62112e-179	1.29549e-174	0.456	0.098	GMP1
RP11-84C10.2	0.312574	9.04501e-172	1.76975e-167	0.339	0.041	GMP1
IGFBP2	0.284703	5.56696e-167	1.08923e-162	0.358	0.073	GMP1
FTL	0.266121	3.55583e-152	6.95733e-148	1	1	GMP1
KBTBD11	0.28613	4.45082e-151	8.70847e-147	0.387	0.076	GMP1
TMEM258	0.372555	2.48869e-150	4.86936e-146	0.978	0.94	GMP1
C2orf82	0.42399	2.52727e-145	4.94485e-141	0.549	0.273	GMP1
C12orf57	0.383684	5.02448e-145	9.8309e-141	0.991	0.975	GMP1
LYST	0.306136	5.52651e-133	1.08132e-128	0.447	0.157	GMP1
VAT1	0.322395	8.52243e-131	1.6675e-126	0.524	0.237	GMP1
P4HB	0.377867	3.37361e-129	6.60081e-125	0.895	0.773	GMP1
VAMP8	0.342404	1.05568e-125	2.06555e-121	0.998	0.988	GMP1
FKBP2	0.387161	7.15904e-123	1.40074e-118	0.836	0.674	GMP1
SEC61B	0.361102	1.5139e-122	2.9621e-118	0.985	0.956	GMP1
SERF2	0.302488	3.54305e-120	6.93234e-116	1	1	GMP1
MFSD10	0.333658	3.71177e-119	7.26244e-115	0.728	0.521	GMP1
NPW	0.369806	6.72934e-116	1.31666e-111	0.584	0.325	GMP1
MYDGF	0.360768	1.78649e-114	3.49545e-110	0.885	0.796	GMP1
APLP2	0.391116	5.86424e-114	1.1474e-109	0.932	0.852	GMP1
FAM46A	0.375641	1.33539e-107	2.61282e-103	0.647	0.356	GMP1
RNASEH2C	0.374966	2.05173e-107	4.01442e-103	0.933	0.847	GMP1
VAMP5	0.419186	2.08368e-107	4.07693e-103	0.847	0.615	GMP1
NAALADL1	0.339455	1.17804e-102	2.30494e-98	0.651	0.334	GMP1
CD81	0.254129	3.38697e-97	6.62695e-93	0.415	0.188	GMP1
SEC61G	0.330794	5.17312e-94	1.01217e-89	0.939	0.887	GMP1
HSP90B1	0.393498	6.70137e-94	1.31119e-89	0.914	0.793	GMP1
PPIB	0.332327	9.50014e-92	1.8588e-87	0.954	0.913	GMP1
MTDH	0.315721	1.38392e-85	2.70778e-81	0.985	0.958	GMP1
MYB	0.285342	4.94729e-84	9.67988e-80	0.715	0.536	GMP1
HSPA5	0.385414	3.1511e-83	6.16545e-79	0.814	0.669	GMP1
NKG7	0.252314	5.05033e-78	9.88148e-74	0.457	0.183	GMP1
CRELD2	0.26774	1.39059e-77	2.72084e-73	0.512	0.371	GMP1
FKBP11	0.280514	6.29356e-77	1.2314e-72	0.564	0.415	GMP1
SNHG19	0.301068	1.06065e-76	2.07527e-72	0.796	0.695	GMP1
AC004791.2	0.357494	1.00777e-74	1.9718e-70	0.409	0.155	GMP1
PLAC8	0.252479	1.52744e-71	2.98859e-67	0.963	0.872	GMP1
CSF3R	0.276627	3.81213e-68	7.45881e-64	0.836	0.571	GMP1
ATOX1	0.255895	5.22896e-59	1.0231e-54	0.836	0.721	GMP1
NDUFB9	0.259312	1.3383e-58	2.61852e-54	0.97	0.947	GMP1
CTC-425F1.4	0.25806	2.45089e-54	4.79541e-50	0.277	0.129	GMP1
MANF	0.269188	2.55072e-53	4.99074e-49	0.731	0.612	GMP1
BEX1	0.291765	7.3277e-29	1.43374e-24	0.714	0.61	GMP1
LYZ	2.07369	0	0	0.946	0.304	GMP2
TMSB10	1.05618	2.91366e-161	5.70086e-157	1	0.999	GMP2
CSTA	1.28134	1.58805e-160	3.10718e-156	0.843	0.118	GMP2
LGALS1	2.05533	1.59129e-153	3.11351e-149	0.946	0.179	GMP2
GPX1	0.938714	9.63683e-148	1.88554e-143	1	0.984	GMP2
PLAC8	1.00373	1.44715e-120	2.8315e-116	0.994	0.881	GMP2
HCST	1.12317	9.0051e-119	1.76194e-114	0.94	0.339	GMP2
MRPL33	0.707436	2.6203e-117	5.12687e-113	0.964	0.742	GMP2
IRF8	0.827055	5.4411e-104	1.06461e-99	0.747	0.065	GMP2
MPO	1.56089	9.94002e-103	1.94486e-98	1	0.55	GMP2
C20orf27	0.662343	2.55982e-91	5.00855e-87	0.916	0.678	GMP2
PYCARD	0.751385	6.51923e-91	1.27555e-86	0.964	0.751	GMP2
ANXA2	0.813359	1.30152e-90	2.54655e-86	0.801	0.272	GMP2
TMSB4X	1.11386	4.54646e-90	8.8956e-86	1	0.987	GMP2
KCNE5	0.70971	3.85303e-86	7.53883e-82	0.614	0.063	GMP2
CYBA	0.911587	2.61368e-85	5.11393e-81	1	0.942	GMP2
NKG7	0.706527	1.88317e-79	3.68461e-75	0.753	0.205	GMP2
LY86	0.560218	6.16269e-78	1.20579e-73	0.506	0.028	GMP2
CXorf21	0.720602	1.08487e-75	2.12266e-71	0.765	0.221	GMP2
RPLP2	0.303959	7.30374e-75	1.42905e-70	1	1	GMP2
TYROBP	0.785836	2.66864e-74	5.22147e-70	0.699	0.12	GMP2
RPL28	0.289365	1.68145e-72	3.28992e-68	1	1	GMP2
PLD4	0.792023	4.94403e-65	9.67349e-61	0.753	0.202	GMP2
RPLP1	0.263246	7.81186e-65	1.52847e-60	1	1	GMP2
MYL6	0.56225	1.46544e-63	2.86729e-59	1	0.986	GMP2
IFI27L2	0.544021	2.67958e-63	5.24286e-59	0.711	0.353	GMP2
CSF1R	0.344725	4.7359e-63	9.26626e-59	0.392	0.02	GMP2
DBI	0.556501	1.32395e-61	2.59043e-57	0.928	0.81	GMP2
VAMP8	0.576501	2.67565e-58	5.23517e-54	1	0.989	GMP2
GRN	0.56746	9.60078e-58	1.87849e-53	0.843	0.567	GMP2
FTL	0.412806	9.63984e-58	1.88613e-53	1	1	GMP2
ATP5E	0.513727	1.16898e-56	2.28722e-52	1	0.997	GMP2
CORO1A	0.719967	6.69241e-53	1.30944e-48	0.934	0.625	GMP2
RNASE2	0.676102	3.596e-52	7.03593e-48	0.886	0.322	GMP2
UBA52	0.272397	1.1767e-51	2.30232e-47	1	1	GMP2
SERF2	0.439706	3.4625e-50	6.77472e-46	1	1	GMP2
SH3BGRL3	0.599441	1.50768e-49	2.94993e-45	0.861	0.745	GMP2
TSPO	0.526164	2.22433e-48	4.35212e-44	0.976	0.939	GMP2
SAMHD1	0.428299	2.23588e-48	4.37472e-44	0.392	0.036	GMP2
ITGB2	0.535243	3.41234e-48	6.67659e-44	0.777	0.418	GMP2
KLF6	0.623197	5.8311e-48	1.14091e-43	0.765	0.311	GMP2
FAM107B	0.360572	2.2952e-46	4.49078e-42	0.434	0.066	GMP2
KIAA0930	0.439102	3.25447e-46	6.3677e-42	0.554	0.19	GMP2
ERP29	0.460131	9.48737e-46	1.8563e-41	0.994	0.978	GMP2
FLNA	0.43874	3.33207e-45	6.51953e-41	0.524	0.239	GMP2
BLOC1S1	0.477998	2.15051e-43	4.20769e-39	0.873	0.735	GMP2
CNPY3	0.470639	4.3483e-43	8.50789e-39	0.843	0.676	GMP2
EMB	0.446346	1.17346e-42	2.29599e-38	0.645	0.343	GMP2
CTSG	0.658788	1.01971e-41	1.99516e-37	0.807	0.318	GMP2
SRGN	0.595743	7.08669e-41	1.38658e-36	0.982	0.916	GMP2
GSTP1	0.460345	4.20806e-40	8.23348e-36	1	0.995	GMP2
HLA-DRB1	0.609069	2.28376e-39	4.46841e-35	0.994	0.928	GMP2
NUP210	0.360818	1.6169e-38	3.16362e-34	0.56	0.282	GMP2
POU2F2	0.462723	1.72848e-38	3.38195e-34	0.56	0.17	GMP2
ADRB2	0.268384	3.48458e-38	6.81793e-34	0.283	0.023	GMP2
RNASE6	0.444382	7.34316e-38	1.43676e-33	0.488	0.091	GMP2
FCGRT	0.529831	1.19407e-37	2.33631e-33	0.711	0.406	GMP2
HLA-DMB	0.495825	1.1966e-37	2.34127e-33	0.608	0.204	GMP2
RNASET2	0.454322	1.35445e-37	2.65011e-33	0.886	0.734	GMP2
SERPINB8	0.2905	1.62276e-37	3.17509e-33	0.325	0.043	GMP2
FOS	0.758604	2.03378e-37	3.9793e-33	0.819	0.462	GMP2
TYMP	0.371922	3.10394e-37	6.07317e-33	0.47	0.192	GMP2
LAMTOR4	0.424017	5.84305e-37	1.14325e-32	0.946	0.882	GMP2
RPL22	0.351081	8.02554e-37	1.57028e-32	1	1	GMP2
NREP	0.453837	9.99065e-37	1.95477e-32	0.723	0.519	GMP2
BCL2	0.348263	1.69805e-36	3.3224e-32	0.434	0.118	GMP2
PGLS	0.433587	2.15958e-36	4.22544e-32	0.928	0.831	GMP2
CST3	0.586064	4.70947e-35	9.21456e-31	0.873	0.74	GMP2
EGR1	0.308056	1.44219e-34	2.82179e-30	0.271	0.029	GMP2
ATP5L	0.308685	4.2012e-34	8.22006e-30	1	1	GMP2
COX8A	0.435357	2.35897e-32	4.61557e-28	0.988	0.944	GMP2
MINOS1	0.3893	2.95064e-32	5.77322e-28	0.657	0.462	GMP2
CD33	0.324982	4.66269e-32	9.12301e-28	0.488	0.14	GMP2
PSME2	0.432177	5.85289e-32	1.14518e-27	0.958	0.937	GMP2
LCP1	0.401702	6.1923e-32	1.21158e-27	0.801	0.573	GMP2
COTL1	0.323807	7.33748e-32	1.43565e-27	0.398	0.115	GMP2
NPC2	0.418555	1.73178e-31	3.38839e-27	0.934	0.821	GMP2
MNDA	0.309586	6.454e-31	1.26279e-26	0.337	0.046	GMP2
AP2S1	0.386149	1.05543e-30	2.06506e-26	0.94	0.845	GMP2
GNAS	0.349794	1.17249e-30	2.2941e-26	0.783	0.714	GMP2
RAC1	0.353215	1.58093e-30	3.09324e-26	0.602	0.383	GMP2
MIF4GD	0.33328	2.44784e-29	4.78945e-25	0.62	0.448	GMP2
PRSS57	0.431199	6.46932e-29	1.26579e-24	1	0.98	GMP2
HLA-DQB1	0.461066	6.78214e-29	1.32699e-24	0.849	0.613	GMP2
LSP1	0.530102	8.32174e-29	1.62823e-24	0.825	0.609	GMP2
PKM	0.462187	8.51375e-29	1.6658e-24	0.946	0.728	GMP2
MS4A6A	0.270159	1.00815e-28	1.97255e-24	0.181	0.009	GMP2
CLEC11A	0.428203	5.71173e-28	1.11756e-23	0.687	0.841	GMP2
NDUFB2	0.389344	8.00178e-28	1.56563e-23	0.97	0.899	GMP2
ARPC1B	0.361098	1.03601e-27	2.02706e-23	0.982	0.927	GMP2
RP11-160E2.6	0.347206	4.72458e-27	9.24412e-23	0.44	0.274	GMP2
ZEB2	0.367203	1.574e-26	3.07969e-22	0.675	0.525	GMP2
EIF3B	0.313815	3.04959e-26	5.96682e-22	0.494	0.298	GMP2
CD74	0.534409	8.28015e-26	1.62009e-21	1	0.969	GMP2
CEBPD	0.265972	9.78214e-26	1.91397e-21	0.325	0.068	GMP2
CFD	0.683385	6.65915e-25	1.30293e-20	0.729	0.407	GMP2
RASGRP2	0.391661	8.56397e-25	1.67563e-20	0.795	0.566	GMP2
CFL1	0.370136	8.97912e-25	1.75685e-20	1	0.997	GMP2
SPNS3	0.381979	9.62063e-25	1.88237e-20	0.59	0.251	GMP2
ODF3B	0.329526	4.09047e-24	8.00341e-20	0.5	0.225	GMP2
VIM	0.408508	4.14299e-24	8.10618e-20	1	0.903	GMP2
S100A4	0.398384	9.25085e-24	1.81002e-19	1	0.883	GMP2
SNRNP25	0.333197	9.66353e-24	1.89077e-19	0.777	0.612	GMP2
AZU1	0.496532	1.58225e-23	3.09584e-19	0.771	0.38	GMP2
ARPC2	0.335271	1.73773e-23	3.40005e-19	0.994	0.979	GMP2
SH3KBP1	0.31994	2.00716e-23	3.92721e-19	0.572	0.356	GMP2
SSR4	0.330339	2.48895e-23	4.86988e-19	0.994	0.969	GMP2
TIMM8B	0.330407	2.83711e-23	5.55108e-19	0.849	0.79	GMP2
UQCR11	0.347457	5.20246e-23	1.01791e-18	0.94	0.87	GMP2
MGST3	0.366498	9.64995e-23	1.88811e-18	0.843	0.673	GMP2
C1QTNF4	0.283386	1.75668e-22	3.43712e-18	0.343	0.113	GMP2
SYK	0.292809	3.48002e-22	6.809e-18	0.548	0.33	GMP2
CTSZ	0.290658	2.29931e-21	4.49882e-17	0.434	0.239	GMP2
HLA-DMA	0.402781	2.61566e-21	5.11779e-17	0.849	0.766	GMP2
HCLS1	0.284146	3.25102e-21	6.36094e-17	0.596	0.489	GMP2
IER2	0.363949	4.75339e-21	9.30049e-17	0.645	0.491	GMP2
PDE7A	0.25363	1.68627e-20	3.29936e-16	0.416	0.196	GMP2
HNRNPU-AS1	0.280614	1.88327e-20	3.68481e-16	0.452	0.239	GMP2
ZFP36	0.30728	2.0111e-20	3.93491e-16	0.416	0.163	GMP2
GNAI2	0.305632	2.37814e-20	4.65307e-16	0.717	0.569	GMP2
MYO1F	0.250508	3.75693e-20	7.35081e-16	0.331	0.128	GMP2
ACTG1	0.400308	6.35103e-20	1.24264e-15	1	0.998	GMP2
HIGD2A	0.296343	6.41245e-20	1.25466e-15	0.964	0.95	GMP2
MCL1	0.271487	1.13824e-19	2.22708e-15	0.464	0.257	GMP2
JUND	0.265309	1.43745e-19	2.81252e-15	0.38	0.165	GMP2
PARVG	0.292834	1.98858e-19	3.89086e-15	0.578	0.364	GMP2
FCER1G	0.366771	3.90725e-19	7.64493e-15	0.434	0.187	GMP2
C4orf48	0.298718	1.65388e-18	3.23598e-14	0.627	0.449	GMP2
POLE4	0.278992	1.65899e-18	3.24597e-14	0.723	0.585	GMP2
FABP5	0.352392	1.89639e-18	3.71047e-14	0.988	0.922	GMP2
ANAPC11	0.304568	2.40303e-18	4.70177e-14	0.904	0.863	GMP2
HLA-DPB1	0.364346	5.7917e-18	1.1332e-13	0.994	0.912	GMP2
CD44	0.318347	9.25328e-18	1.8105e-13	0.741	0.512	GMP2
KCNAB2	0.26673	2.99664e-17	5.86324e-13	0.494	0.29	GMP2
SPI1	0.32928	1.29392e-16	2.53167e-12	0.741	0.559	GMP2
ATOX1	0.288246	1.52784e-16	2.98937e-12	0.795	0.733	GMP2
NDUFA2	0.287178	2.4512e-16	4.79602e-12	0.952	0.864	GMP2
HSP90B1	0.363623	4.36276e-16	8.53618e-12	0.898	0.806	GMP2
CKLF	0.258157	7.76499e-16	1.5193e-11	0.675	0.546	GMP2
TMA7	0.261809	1.07747e-15	2.10818e-11	0.994	0.987	GMP2
UQCRQ	0.293977	2.29422e-15	4.48886e-11	0.976	0.919	GMP2
TRIM28	0.260166	2.30333e-15	4.5067e-11	0.62	0.482	GMP2
CANX	0.259221	3.38062e-15	6.61453e-11	0.753	0.637	GMP2
NUDT1	0.268982	5.06607e-15	9.91228e-11	0.892	0.813	GMP2
ARHGAP4	0.257129	5.71485e-15	1.11817e-10	0.572	0.367	GMP2
CD48	0.318521	7.55111e-15	1.47745e-10	0.651	0.363	GMP2
FKBP2	0.288184	7.6191e-15	1.49075e-10	0.837	0.69	GMP2
HMGN2	0.345529	1.06082e-14	2.07559e-10	0.88	0.871	GMP2
HNRNPU	0.297607	1.63897e-14	3.20681e-10	0.922	0.861	GMP2
HLA-DRB5	0.315672	3.59329e-14	7.03063e-10	0.916	0.817	GMP2
CALM1	0.302062	3.603e-14	7.04962e-10	0.849	0.741	GMP2
NDUFA1	0.253406	4.84663e-14	9.48292e-10	0.964	0.884	GMP2
LAIR1	0.263526	5.75789e-14	1.12659e-09	0.494	0.238	GMP2
AIF1	0.288983	7.84412e-14	1.53478e-09	0.994	0.942	GMP2
IRF2BP2	0.261074	1.08062e-13	2.11435e-09	0.693	0.559	GMP2
COX7B	0.254576	1.44059e-13	2.81866e-09	0.952	0.916	GMP2
CH17-373J23.1	0.354971	2.95722e-13	5.78609e-09	0.584	0.408	GMP2
SEC61B	0.258561	3.89829e-13	7.6274e-09	0.994	0.959	GMP2
ATP5D	0.256971	8.9701e-13	1.75509e-08	0.91	0.851	GMP2
TNFSF13B	0.274579	1.03002e-12	2.01534e-08	0.904	0.855	GMP2
HLA-DRA	0.298457	1.03842e-12	2.03177e-08	1	0.945	GMP2
SDF2L1	0.303938	5.41985e-12	1.06045e-07	0.741	0.615	GMP2
LAT2	0.28708	1.12268e-11	2.19663e-07	0.735	0.549	GMP2
FUS	0.252675	1.1792e-11	2.30722e-07	0.964	0.875	GMP2
ATP5G1	0.259589	3.77296e-11	7.38217e-07	0.94	0.905	GMP2
SAT1	0.26392	1.13708e-10	2.22482e-06	0.675	0.505	GMP2
VAMP5	0.27965	1.98089e-10	3.87581e-06	0.729	0.64	GMP2
RAB32	0.26134	4.46807e-10	8.74223e-06	0.789	0.577	GMP2
SOX4	0.258803	3.21438e-09	6.28925e-05	0.892	0.793	GMP2
LYZ	3.33381	5.9924e-127	1.17247e-122	1	0.315	Monocytes
CST3	2.06633	1.03363e-91	2.0224e-87	1	0.742	Monocytes
S100A10	1.85511	1.61433e-59	3.15859e-55	0.913	0.159	Monocytes
ANXA2	1.64052	3.18197e-57	6.22585e-53	0.957	0.28	Monocytes
TMSB10	1.75502	2.55025e-56	4.98981e-52	1	0.999	Monocytes
SAMHD1	1.3599	5.69591e-51	1.11446e-46	1	0.04	Monocytes
FCER1G	1.51241	5.45452e-41	1.06723e-36	1	0.189	Monocytes
CORO1A	1.55751	8.16129e-40	1.59684e-35	1	0.63	Monocytes
ITGB2	1.17136	1.43631e-38	2.81029e-34	0.957	0.423	Monocytes
CYBA	1.59218	1.02897e-35	2.01329e-31	1	0.943	Monocytes
FCGRT	1.1696	2.03235e-34	3.9765e-30	1	0.41	Monocytes
GPX1	1.20525	5.7619e-34	1.12737e-29	1	0.985	Monocytes
LGALS1	2.4856	1.53751e-31	3.0083e-27	1	0.191	Monocytes
LY86	1.1798	2.80424e-31	5.48677e-27	0.87	0.035	Monocytes
PLP2	1.11593	1.00904e-28	1.9743e-24	1	0.573	Monocytes
HCST	1.4213	1.9848e-28	3.88346e-24	0.957	0.349	Monocytes
PLD4	1.37258	6.3448e-28	1.24142e-23	1	0.211	Monocytes
HLA-DQB1	1.12184	3.01196e-27	5.8932e-23	0.87	0.617	Monocytes
TYROBP	1.24691	1.14671e-26	2.24365e-22	0.957	0.129	Monocytes
HLA-DQA1	1.07295	1.69732e-26	3.32097e-22	0.87	0.373	Monocytes
CTSH	0.76786	2.20748e-26	4.31915e-22	0.522	0.066	Monocytes
MYL6	0.968938	3.37021e-26	6.59415e-22	1	0.987	Monocytes
CTSZ	0.915466	7.93636e-26	1.55283e-21	0.826	0.241	Monocytes
SH3BGRL3	1.13592	1.54191e-25	3.01691e-21	0.826	0.747	Monocytes
TMSB4X	1.69749	2.44856e-25	4.79085e-21	1	0.987	Monocytes
CSTA	1.37977	2.73012e-25	5.34175e-21	0.783	0.131	Monocytes
NKG7	0.98748	4.79738e-24	9.38655e-20	0.826	0.214	Monocytes
VIM	1.3007	2.4934e-23	4.87859e-19	1	0.905	Monocytes
S100A11	0.991276	6.67178e-23	1.3054e-18	1	0.616	Monocytes
C12orf75	1.07779	1.3539e-22	2.64904e-18	0.913	0.234	Monocytes
LSP1	1.19461	4.67237e-22	9.14196e-18	0.957	0.613	Monocytes
ARPC1B	0.860066	7.48933e-22	1.46536e-17	1	0.928	Monocytes
CFL1	0.872309	8.12935e-22	1.59059e-17	1	0.997	Monocytes
HLA-DPA1	1.33528	2.30523e-21	4.51041e-17	1	0.918	Monocytes
HLA-DRB1	1.25902	3.05774e-21	5.98278e-17	1	0.929	Monocytes
HLA-DMB	0.986732	5.17368e-21	1.01228e-16	0.826	0.21	Monocytes
HLA-DPB1	1.2164	1.12303e-20	2.19733e-16	1	0.914	Monocytes
ACTB	0.932689	1.98825e-20	3.8902e-16	1	1	Monocytes
PLAC8	1.1825	2.2069e-20	4.31802e-16	0.87	0.883	Monocytes
MYL12A	0.862135	2.26777e-20	4.43711e-16	0.957	0.912	Monocytes
IGSF6	0.747907	6.7914e-20	1.32881e-15	0.522	0.008	Monocytes
IRF8	1.21553	2.24345e-19	4.38953e-15	0.87	0.076	Monocytes
CD74	1.59599	2.9214e-19	5.71602e-15	1	0.969	Monocytes
ID2	1.22887	2.95981e-19	5.79116e-15	0.435	0.082	Monocytes
SERF2	0.729802	3.36621e-19	6.58633e-15	1	1	Monocytes
FGL2	0.537817	6.52665e-19	1.277e-14	0.522	0.019	Monocytes
BLOC1S1	0.745777	3.00893e-18	5.88728e-14	0.957	0.737	Monocytes
GRN	0.791944	5.32343e-17	1.04158e-12	0.87	0.571	Monocytes
PSME2	0.786157	6.03447e-17	1.18071e-12	0.957	0.937	Monocytes
TIFAB	0.578876	1.32088e-16	2.58443e-12	0.565	0.019	Monocytes
CXCR3	0.402588	1.62815e-16	3.18564e-12	0.391	0.003	Monocytes
NPC2	0.777739	2.4288e-16	4.75219e-12	0.957	0.822	Monocytes
MNDA	0.737956	3.92344e-16	7.67661e-12	0.696	0.05	Monocytes
HLA-DRB5	0.909546	5.15759e-16	1.00913e-11	1	0.818	Monocytes
ARPC3	0.674803	8.57848e-16	1.67846e-11	1	0.987	Monocytes
IFI27L2	0.689706	2.29578e-15	4.49192e-11	0.826	0.359	Monocytes
SEPT9	0.673506	2.38566e-15	4.66779e-11	0.913	0.263	Monocytes
S100B	0.722748	4.36588e-15	8.54228e-11	0.304	0.042	Monocytes
COTL1	0.612958	1.80268e-14	3.52713e-10	0.478	0.119	Monocytes
TNNI2	0.711138	1.81934e-14	3.55972e-10	0.652	0.045	Monocytes
FAM49B	0.573241	5.87688e-14	1.14987e-09	0.739	0.553	Monocytes
AKR7A2	0.55551	5.95569e-14	1.16529e-09	0.565	0.505	Monocytes
HLA-DRA	1.18495	6.0205e-14	1.17797e-09	1	0.946	Monocytes
CLEC4A	0.37974	6.66433e-14	1.30394e-09	0.391	0.007	Monocytes
RNH1	0.626964	7.24291e-14	1.41715e-09	0.826	0.568	Monocytes
ENHO	0.343933	7.87877e-14	1.54156e-09	0.304	0.002	Monocytes
ALDH2	0.696775	9.01698e-14	1.76426e-09	0.739	0.232	Monocytes
UNC93B1	0.618427	1.08948e-13	2.13167e-09	0.609	0.161	Monocytes
LILRA2	0.475383	1.12214e-13	2.19558e-09	0.522	0.036	Monocytes
HLA-DMA	0.798347	1.243e-13	2.43206e-09	0.957	0.767	Monocytes
ABI3	0.424992	1.31451e-13	2.57197e-09	0.348	0.012	Monocytes
ANXA5	0.701273	1.95123e-13	3.81779e-09	0.826	0.339	Monocytes
PYCARD	0.735969	2.03091e-13	3.97368e-09	0.913	0.755	Monocytes
DBI	0.660197	3.1551e-13	6.17326e-09	0.913	0.812	Monocytes
S100A4	1.16376	3.97988e-13	7.78703e-09	0.957	0.885	Monocytes
DBNL	0.511655	5.22559e-13	1.02244e-08	0.609	0.474	Monocytes
LILRB4	0.660174	5.7688e-13	1.12872e-08	0.522	0.026	Monocytes
CALM1	0.739517	7.26419e-13	1.42131e-08	0.87	0.742	Monocytes
CNPY3	0.635409	7.27036e-13	1.42252e-08	0.783	0.679	Monocytes
SPI1	0.721115	9.52538e-13	1.86374e-08	0.913	0.562	Monocytes
WDFY4	0.464588	1.07617e-12	2.10563e-08	0.478	0.051	Monocytes
GNAI2	0.602967	1.37969e-12	2.69951e-08	0.826	0.571	Monocytes
ITGB7	0.524034	1.78691e-12	3.49627e-08	0.522	0.047	Monocytes
VAMP8	0.682595	2.21375e-12	4.33143e-08	1	0.989	Monocytes
CFP	0.494208	6.06857e-12	1.18738e-07	0.522	0.069	Monocytes
RNASET2	0.603582	7.15725e-12	1.40039e-07	0.87	0.736	Monocytes
KCTD12	0.390346	7.22915e-12	1.41446e-07	0.348	0.012	Monocytes
SEMA4A	0.434584	7.41835e-12	1.45147e-07	0.522	0.047	Monocytes
NDRG2	0.420057	8.09403e-12	1.58368e-07	0.348	0.028	Monocytes
WDFY2	0.523202	1.59968e-11	3.12994e-07	0.565	0.22	Monocytes
SHTN1	0.405162	1.65129e-11	3.23091e-07	0.391	0.026	Monocytes
COX8A	0.642856	1.66749e-11	3.2626e-07	1	0.945	Monocytes
BATF3	0.334738	1.89697e-11	3.71161e-07	0.217	0.013	Monocytes
GPSM3	0.607234	2.49623e-11	4.88412e-07	0.87	0.731	Monocytes
ATP5E	0.578932	2.69085e-11	5.26491e-07	1	0.997	Monocytes
CAMP	0.390556	3.36436e-11	6.58271e-07	0.261	0.002	Monocytes
CD63	0.583198	3.61961e-11	7.08213e-07	0.87	0.892	Monocytes
MARCH1	0.318699	4.58164e-11	8.96443e-07	0.304	0.004	Monocytes
PFN1	0.579721	6.35007e-11	1.24245e-06	1	0.999	Monocytes
KCNMB1	0.377062	7.47761e-11	1.46307e-06	0.348	0.028	Monocytes
GSN	0.742602	7.76277e-11	1.51886e-06	0.783	0.333	Monocytes
PHACTR1	0.575335	8.97264e-11	1.75559e-06	0.696	0.217	Monocytes
CLEC12A	0.522489	9.35406e-11	1.83021e-06	0.565	0.145	Monocytes
PPM1J	0.333082	1.10437e-10	2.1608e-06	0.304	0.005	Monocytes
SNRNP25	0.595319	1.50955e-10	2.95359e-06	0.87	0.614	Monocytes
FGR	0.250628	1.53378e-10	3.001e-06	0.261	0.002	Monocytes
STXBP2	0.473183	1.96249e-10	3.8398e-06	0.696	0.429	Monocytes
FLNA	0.555646	3.54298e-10	6.9322e-06	0.652	0.244	Monocytes
AHR	0.431511	3.67147e-10	7.1836e-06	0.348	0.042	Monocytes
GSTP1	0.645697	3.80852e-10	7.45176e-06	1	0.995	Monocytes
S100Z	0.436988	4.02249e-10	7.87041e-06	0.348	0.103	Monocytes
CD86	0.318261	4.22562e-10	8.26784e-06	0.304	0.008	Monocytes
ERP29	0.567902	4.44312e-10	8.69342e-06	1	0.979	Monocytes
ATP6V0D1	0.466726	5.40514e-10	1.05757e-05	0.696	0.427	Monocytes
RAB31	0.39327	5.43608e-10	1.06362e-05	0.304	0.014	Monocytes
HCLS1	0.476783	6.18541e-10	1.21024e-05	0.565	0.491	Monocytes
MTMR11	0.259827	6.4583e-10	1.26363e-05	0.261	0.003	Monocytes
MRPL33	0.588671	8.56853e-10	1.67652e-05	0.957	0.745	Monocytes
TNFAIP2	0.377519	9.97532e-10	1.95177e-05	0.348	0.03	Monocytes
MTMR14	0.412738	1.03909e-09	2.03308e-05	0.522	0.3	Monocytes
EMP3	0.849823	3.00632e-09	5.88217e-05	0.913	0.496	Monocytes
PAK1	0.448283	3.18264e-09	6.22715e-05	0.565	0.214	Monocytes
PSMB3	0.516931	3.25534e-09	6.36939e-05	1	0.923	Monocytes
ACY3	0.578741	3.45452e-09	6.75912e-05	0.522	0.065	Monocytes
TYMP	0.477535	3.82762e-09	7.48913e-05	0.522	0.197	Monocytes
CACNA2D3	0.28837	3.95092e-09	7.73038e-05	0.261	0.005	Monocytes
SH3KBP1	0.514464	4.035e-09	7.89488e-05	0.739	0.359	Monocytes
LAMTOR1	0.513502	4.04364e-09	7.91179e-05	1	0.928	Monocytes
JAML	0.591156	4.0698e-09	7.96297e-05	0.435	0.043	Monocytes
AP2S1	0.469546	4.47092e-09	8.7478e-05	0.87	0.847	Monocytes
EZR	0.379261	5.09179e-09	9.96259e-05	0.478	0.343	Monocytes
CXorf21	0.673509	5.29554e-09	0.000103613	0.609	0.23	Monocytes
COX5B	0.528877	5.52744e-09	0.00010815	1	0.978	Monocytes
CARD16	0.47408	6.11535e-09	0.000119653	0.739	0.397	Monocytes
LSM4	0.442695	6.30135e-09	0.000123292	0.826	0.897	Monocytes
SRP14	0.457543	7.11819e-09	0.000139274	1	0.995	Monocytes
SH3BP1	0.396341	7.92509e-09	0.000155062	0.391	0.115	Monocytes
SLAMF7	0.350086	8.01655e-09	0.000156852	0.304	0.017	Monocytes
ARPC2	0.56414	8.78883e-09	0.000171962	1	0.979	Monocytes
BLNK	0.438254	9.3713e-09	0.000183359	0.478	0.048	Monocytes
RAC1	0.498807	1.03531e-08	0.000202569	0.565	0.387	Monocytes
AIF1	0.682081	1.29385e-08	0.000253154	1	0.943	Monocytes
SEL1L3	0.359164	1.34079e-08	0.000262339	0.435	0.036	Monocytes
METTL7B	0.299189	1.35197e-08	0.000264526	0.304	0.018	Monocytes
OAZ1	0.458817	1.46687e-08	0.000287008	1	0.999	Monocytes
LIMD2	0.60691	1.52057e-08	0.000297516	0.957	0.814	Monocytes
ATP5L	0.374619	1.80848e-08	0.000353847	1	1	Monocytes
ITGAX	0.275657	1.90433e-08	0.000372601	0.261	0.01	Monocytes
PPP1CA	0.433743	2.80361e-08	0.000548554	0.87	0.866	Monocytes
CD48	0.660023	2.93678e-08	0.000574611	0.783	0.367	Monocytes
RNASE2	0.835929	2.94855e-08	0.000576913	0.826	0.331	Monocytes
TRAPPC1	0.445054	3.11746e-08	0.000609962	0.913	0.839	Monocytes
IRF7	0.691513	4.34148e-08	0.000849453	0.783	0.377	Monocytes
LPXN	0.333659	4.871e-08	0.00095306	0.435	0.045	Monocytes
TBCB	0.443624	6.04107e-08	0.001182	0.87	0.687	Monocytes
TMA7	0.489249	6.12759e-08	0.00119892	1	0.987	Monocytes
FAM105A	0.38129	6.47827e-08	0.00126754	0.391	0.056	Monocytes
TMEM109	0.340825	6.82965e-08	0.00133629	0.522	0.521	Monocytes
SERPINB8	0.325987	6.89163e-08	0.00134842	0.435	0.047	Monocytes
TMEM55B	0.320714	7.45959e-08	0.00145954	0.348	0.222	Monocytes
CAPG	0.579035	7.51431e-08	0.00147025	0.652	0.41	Monocytes
RNASE6	0.597478	7.65066e-08	0.00149693	0.565	0.097	Monocytes
ARHGDIA	0.446885	1.06099e-07	0.00207594	0.826	0.721	Monocytes
REEP5	0.470502	1.09574e-07	0.00214393	0.696	0.352	Monocytes
PSMB8	0.494335	1.45294e-07	0.00284282	1	0.883	Monocytes
NAGK	0.452286	1.86133e-07	0.00364188	0.696	0.308	Monocytes
CYB561D2	0.361115	1.98698e-07	0.00388773	0.522	0.227	Monocytes
KCNE5	0.60407	2.07897e-07	0.00406771	0.348	0.073	Monocytes
CSTB	0.420775	2.45333e-07	0.00480019	0.739	0.736	Monocytes
ALOX5AP	0.623427	2.50653e-07	0.00490427	0.435	0.05	Monocytes
ATP5J2	0.457178	2.89893e-07	0.00567204	0.957	0.939	Monocytes
SUB1	0.498585	2.96693e-07	0.0058051	1	0.975	Monocytes
PRKCB	0.471845	3.01147e-07	0.00589224	0.565	0.242	Monocytes
PARK7	0.464931	3.28384e-07	0.00642517	0.957	0.904	Monocytes
CASP1	0.476416	3.49394e-07	0.00683623	0.652	0.273	Monocytes
KLF6	0.63445	3.73058e-07	0.00729925	0.739	0.319	Monocytes
THEMIS2	0.262276	4.10075e-07	0.00802352	0.217	0.09	Monocytes
CCND3	0.518285	4.24575e-07	0.00830723	0.652	0.397	Monocytes
IRF8	2.10464	0	0	0.951	0.051	DC
CORO1A	1.71118	0	0	1	0.619	DC
LSP1	1.6771	0	0	1	0.601	DC
RNASE6	1.64964	0	0	0.914	0.072	DC
IRF7	1.60045	0	0	0.865	0.363	DC
PLAC8	1.55313	0	0	0.993	0.879	DC
PLD4	1.50221	0	0	0.929	0.19	DC
HCST	1.40761	0	0	0.97	0.331	DC
C12orf75	1.3107	0	0	0.865	0.215	DC
CCDC50	1.27999	0	0	0.805	0.238	DC
PLP2	1.27415	0	0	0.963	0.562	DC
TMSB10	1.2522	0	0	1	0.999	DC
BLNK	1.14355	0	0	0.865	0.023	DC
ERP29	0.947425	7.63169e-294	1.49322e-289	0.996	0.978	DC
LGALS1	2.26242	9.28122e-290	1.81596e-285	0.933	0.17	DC
TNNI2	1.31637	3.01915e-282	5.90726e-278	0.79	0.023	DC
MYL12A	1.02422	1.05082e-277	2.05604e-273	0.993	0.909	DC
TCF4	1.02536	6.89683e-265	1.34943e-260	0.94	0.503	DC
HLA-DMB	1.02257	9.77462e-253	1.9125e-248	0.85	0.192	DC
MYL6	0.941881	6.16479e-251	1.2062e-246	1	0.986	DC
SRP14	0.819412	1.21549e-248	2.37822e-244	1	0.994	DC
GPX1	0.940908	1.62134e-242	3.17232e-238	1	0.984	DC
SPIB	1.16466	5.93929e-240	1.16208e-235	0.648	0.013	DC
STMN1	1.22768	1.60368e-238	3.13777e-234	1	0.957	DC
TMSB4X	1.48626	1.33004e-233	2.60235e-229	1	0.986	DC
ITM2C	1.06027	2.91439e-228	5.70229e-224	0.966	0.661	DC
HERPUD1	0.93844	4.55186e-228	8.90617e-224	0.715	0.318	DC
IGKC	0.893171	1.87633e-223	3.67122e-219	0.719	0.044	DC
NREP	0.830286	3.28193e-221	6.42143e-217	0.843	0.513	DC
LGMN	0.792559	4.57289e-208	8.94732e-204	0.569	0.008	DC
ACTG1	1.02036	3.5754e-204	6.99562e-200	1	0.998	DC
SHD	0.765205	3.92828e-200	7.68607e-196	0.689	0.1	DC
HLA-DMA	0.930761	7.08651e-198	1.38655e-193	0.981	0.76	DC
RUNX2	0.754951	2.83733e-197	5.55152e-193	0.7	0.11	DC
LILRB4	0.815054	2.85003e-195	5.57636e-191	0.569	0.01	DC
CXCR4	1.01846	8.20164e-192	1.60473e-187	0.914	0.457	DC
CST3	1.11308	2.44406e-187	4.78204e-183	0.906	0.737	DC
CD74	1.45432	2.52686e-185	4.94405e-181	1	0.969	DC
CXorf21	0.886442	4.62002e-185	9.03954e-181	0.794	0.214	DC
JCHAIN	1.43515	3.7948e-182	7.4249e-178	0.521	0.006	DC
CAPG	0.867998	4.10745e-181	8.03664e-177	0.873	0.396	DC
TYROBP	1.03235	2.23437e-175	4.37177e-171	0.738	0.111	DC
CFL1	0.743072	3.33728e-175	6.52973e-171	1	0.997	DC
CCND3	0.828558	2.05302e-174	4.01694e-170	0.768	0.386	DC
CNPY3	0.752755	3.9493e-172	7.72719e-168	0.914	0.672	DC
FAM129C	0.591986	6.4131e-171	1.25479e-166	0.472	0.007	DC
ADA	0.746505	2.36949e-170	4.63614e-166	0.779	0.305	DC
HMGN2	1.1199	2.75613e-170	5.39264e-166	0.963	0.868	DC
FCER1G	0.962124	2.26576e-168	4.43319e-164	0.7	0.175	DC
CYBA	1.04643	1.34518e-165	2.63197e-161	0.996	0.941	DC
VAMP8	0.799652	4.42065e-165	8.64944e-161	1	0.989	DC
HLA-DPA1	1.05026	2.00201e-162	3.91714e-158	1	0.916	DC
ANXA2	0.902265	1.37643e-160	2.69312e-156	0.764	0.267	DC
GAPT	0.78422	1.90609e-160	3.72946e-156	0.779	0.371	DC
PRMT7	0.693268	6.68536e-159	1.30806e-154	0.476	0.165	DC
CDKN2D	0.699793	2.90143e-157	5.67693e-153	0.498	0.074	DC
CARHSP1	0.68527	1.08652e-150	2.12588e-146	0.787	0.444	DC
ARPC3	0.631843	9.23785e-146	1.80748e-141	1	0.986	DC
UHRF1	0.669866	1.08156e-145	2.11618e-141	0.712	0.285	DC
JAML	0.712893	5.23929e-143	1.02512e-138	0.532	0.029	DC
CD2	0.585867	3.76164e-142	7.36002e-138	0.427	0.008	DC
HLA-DRA	1.10941	1.52614e-141	2.98604e-137	1	0.945	DC
NCF1	0.634713	2.48323e-140	4.85869e-136	0.506	0.033	DC
ACY3	0.851058	1.43544e-137	2.80857e-133	0.524	0.052	DC
CTSZ	0.6458	4.48686e-137	8.77898e-133	0.637	0.23	DC
IDH3A	0.556373	5.5074e-137	1.07758e-132	0.588	0.209	DC
UNC93B1	0.570904	7.68363e-137	1.50338e-132	0.588	0.148	DC
GPR183	0.50391	1.41556e-136	2.76969e-132	0.416	0.007	DC
SPNS3	0.704977	3.98332e-136	7.79376e-132	0.719	0.243	DC
HLA-DPB1	0.922089	7.39048e-136	1.44602e-131	1	0.911	DC
GSN	0.754911	1.36186e-134	2.66462e-130	0.779	0.32	DC
HLA-DRB1	0.918046	4.34255e-134	8.49663e-130	1	0.927	DC
MS4A4A	0.574016	7.23944e-133	1.41647e-128	0.416	0.012	DC
DBI	0.660298	2.42748e-132	4.7496e-128	0.929	0.808	DC
NPC2	0.7065	2.15372e-131	4.21398e-127	0.948	0.819	DC
B2M	0.568956	3.35897e-131	6.57216e-127	1	1	DC
UGCG	0.530932	2.72134e-130	5.32457e-126	0.375	0.071	DC
ACTB	0.673993	3.33863e-129	6.53235e-125	1	1	DC
SCT	1.05917	1.58434e-127	3.09991e-123	0.348	0.003	DC
MZB1	1.04615	2.41018e-124	4.71576e-120	0.925	0.545	DC
CDK2AP2	0.670984	3.30613e-121	6.46877e-117	0.648	0.427	DC
SEPT9	0.612597	5.15954e-120	1.00952e-115	0.663	0.252	DC
LY86	0.582031	1.12087e-118	2.1931e-114	0.476	0.023	DC
LAT2	0.752935	9.16309e-118	1.79285e-113	0.861	0.542	DC
HLA-DRB5	0.747475	3.19631e-116	6.2539e-112	0.993	0.813	DC
ATP5E	0.59361	5.43505e-116	1.06342e-111	1	0.997	DC
CALM1	0.691241	6.01305e-116	1.17651e-111	0.944	0.736	DC
SUB1	0.610623	3.0717e-114	6.01008e-110	0.996	0.974	DC
ALOX5AP	0.929867	2.72362e-113	5.32904e-109	0.483	0.037	DC
TMED10	0.566465	7.11367e-113	1.39186e-108	0.783	0.539	DC
CCDC189	0.52109	8.80953e-113	1.72367e-108	0.502	0.141	DC
DDX5	0.64156	1.50075e-112	2.93637e-108	0.978	0.891	DC
IL3RA	0.550836	1.69652e-111	3.31941e-107	0.442	0.042	DC
SEC61B	0.696983	3.30507e-111	6.46671e-107	0.996	0.958	DC
KIF17	0.407145	1.83994e-109	3.60002e-105	0.386	0.014	DC
CYBB	0.409457	1.55829e-108	3.04895e-104	0.33	0.009	DC
LILRA4	0.584739	1.57417e-108	3.08002e-104	0.277	0.001	DC
CYTH4	0.475637	4.53205e-108	8.86741e-104	0.423	0.025	DC
HS3ST1	0.518444	2.00776e-107	3.92838e-103	0.337	0.019	DC
MAPKAPK2	0.535831	7.38483e-106	1.44492e-101	0.513	0.166	DC
SEPT1	0.554566	9.41835e-106	1.84279e-101	0.625	0.215	DC
LDLRAD4	0.484944	1.09887e-105	2.15005e-101	0.491	0.115	DC
ERCC1	0.549965	1.32804e-104	2.59844e-100	0.88	0.711	DC
SOX4	0.802478	1.38045e-104	2.70098e-100	0.933	0.79	DC
TIFAB	0.393028	6.26221e-104	1.22526e-99	0.36	0.01	DC
RPS6KA4	0.479797	1.70694e-103	3.33981e-99	0.513	0.135	DC
SH3KBP1	0.553966	8.24506e-103	1.61323e-98	0.685	0.349	DC
FYB	0.629995	4.73363e-102	9.26182e-98	0.577	0.175	DC
TRDC	0.427876	4.88625e-101	9.56044e-97	0.326	0.021	DC
DNTT	1.28349	2.26167e-100	4.42519e-96	0.573	0.084	DC
ITGB7	0.442398	4.03786e-99	7.90048e-95	0.326	0.039	DC
KIAA0226L	0.306576	6.21085e-98	1.21521e-93	0.288	0.022	DC
TGFBI	0.478457	4.58109e-97	8.96336e-93	0.258	0.002	DC
CTSB	0.4659	3.38268e-96	6.61855e-92	0.629	0.368	DC
CD53	0.655025	1.48947e-94	2.91429e-90	0.91	0.69	DC
IGHM	0.608091	2.03669e-94	3.98499e-90	0.633	0.175	DC
DCPS	0.456908	4.14142e-94	8.1031e-90	0.513	0.325	DC
SCPEP1	0.431582	4.53582e-94	8.87479e-90	0.438	0.104	DC
RP1-244F24.1	0.359717	4.74782e-94	9.28959e-90	0.348	0.018	DC
MPEG1	0.369828	1.2574e-93	2.46023e-89	0.3	0.005	DC
RASD1	0.449127	3.6029e-91	7.04943e-87	0.3	0.008	DC
IL2RG	0.596106	1.21193e-90	2.37127e-86	0.816	0.516	DC
PSME2	0.587581	3.89449e-90	7.61996e-86	0.97	0.936	DC
RNASEH2B	0.509298	3.17297e-89	6.20823e-85	0.936	0.855	DC
LCP1	0.543035	5.89052e-89	1.15254e-84	0.805	0.57	DC
BLOC1S1	0.530974	7.44493e-89	1.45667e-84	0.891	0.733	DC
DERL3	0.379231	9.2851e-89	1.81672e-84	0.333	0.188	DC
UBC	0.654188	1.09014e-88	2.13296e-84	0.985	0.925	DC
SEL1L3	0.414438	1.15972e-88	2.2691e-84	0.36	0.026	DC
APP	0.564464	2.19559e-87	4.2959e-83	0.633	0.455	DC
VPREB1	0.894497	9.24902e-87	1.80966e-82	0.472	0.116	DC
CD180	0.362035	1.49824e-86	2.93146e-82	0.367	0.026	DC
SH3BGRL3	0.622719	9.69878e-85	1.89766e-80	0.91	0.742	DC
PSMB9	0.590467	4.86341e-84	9.51575e-80	0.963	0.849	DC
SMIM14	0.457184	6.33099e-84	1.23872e-79	0.431	0.074	DC
ATP5L	0.380316	2.05436e-83	4.01956e-79	1	1	DC
HLA-DQB1	0.639871	1.11789e-82	2.18726e-78	0.903	0.609	DC
SPCS1	0.533877	7.50603e-82	1.46863e-77	0.951	0.883	DC
DBNL	0.430104	8.45376e-82	1.65406e-77	0.648	0.469	DC
MAP1A	0.537193	8.47994e-82	1.65919e-77	0.536	0.169	DC
ARPC2	0.521165	3.51288e-81	6.8733e-77	0.989	0.979	DC
NUDT1	0.504227	7.92695e-80	1.55099e-75	0.891	0.812	DC
DDIT4	0.647549	1.15415e-79	2.25821e-75	0.416	0.076	DC
SAMHD1	0.412215	2.86404e-79	5.60378e-75	0.39	0.032	DC
RP11-356I2.4	0.386495	9.7509e-79	1.90786e-74	0.341	0.045	DC
ALDH2	0.485571	1.86387e-78	3.64684e-74	0.558	0.223	DC
LPXN	0.338491	1.71382e-77	3.35326e-73	0.333	0.037	DC
H3F3B	0.523487	1.78631e-76	3.4951e-72	1	0.99	DC
MX1	0.663042	7.26882e-76	1.42222e-71	0.85	0.499	DC
PTPRS	0.542963	2.91171e-73	5.69705e-69	0.228	0.009	DC
PAK1	0.375185	8.49476e-73	1.66208e-68	0.498	0.206	DC
ST6GALNAC4	0.350266	2.01306e-72	3.93876e-68	0.419	0.186	DC
CORO1C	0.345327	2.13166e-70	4.17081e-66	0.416	0.189	DC
AKAP9	0.488231	5.64925e-70	1.10533e-65	0.809	0.686	DC
VIMP	0.428999	1.76259e-69	3.44869e-65	0.573	0.476	DC
PTPRE	0.456513	5.91951e-69	1.15821e-64	0.419	0.126	DC
SUPT3H	0.383671	8.30332e-69	1.62463e-64	0.449	0.182	DC
HMGN1	0.454757	1.61006e-68	3.15024e-64	0.993	0.985	DC
FCRLA	0.279655	2.20026e-68	4.30503e-64	0.187	0.001	DC
ATP6V0D1	0.374242	2.70826e-68	5.29898e-64	0.629	0.421	DC
PPP1R18	0.500494	4.84063e-68	9.47118e-64	0.693	0.383	DC
IGLL1	0.890336	5.80138e-68	1.1351e-63	0.951	0.875	DC
PYCARD	0.536124	8.62653e-68	1.68787e-63	0.914	0.75	DC
GNAS	0.453584	1.70974e-67	3.34527e-63	0.835	0.711	DC
MEF2A	0.361723	2.32754e-67	4.55406e-63	0.416	0.109	DC
HMSD	0.256827	3.58057e-67	7.00575e-63	0.213	0.004	DC
GPSM3	0.509748	6.58329e-67	1.28809e-62	0.891	0.726	DC
STX7	0.382831	7.39272e-67	1.44646e-62	0.502	0.278	DC
HLA-DQA1	0.544184	8.83489e-67	1.72864e-62	0.704	0.364	DC
PAG1	0.359406	9.45676e-67	1.85031e-62	0.401	0.098	DC
PSMB8	0.495345	9.47791e-67	1.85445e-62	0.959	0.881	DC
USF2	0.412141	1.02767e-66	2.01073e-62	0.659	0.471	DC
SLC25A5	0.457227	1.04215e-65	2.03908e-61	0.996	0.98	DC
RAC2	0.477107	1.10206e-65	2.15628e-61	0.959	0.908	DC
VIM	0.657829	1.18683e-65	2.32216e-61	0.981	0.903	DC
CD68	0.351317	1.60158e-65	3.13365e-61	0.228	0.043	DC
AKR1B1	0.427824	3.47633e-65	6.80178e-61	0.749	0.614	DC
CNDP2	0.359269	1.01274e-64	1.98154e-60	0.517	0.345	DC
KLF6	0.599327	1.4064e-64	2.75177e-60	0.659	0.309	DC
UBE2J1	0.454112	1.68621e-64	3.29923e-60	0.73	0.488	DC
ID2	0.700497	2.71347e-64	5.30917e-60	0.352	0.074	DC
APBB1IP	0.409613	2.24426e-63	4.39112e-59	0.622	0.459	DC
SMARCB1	0.410923	3.82439e-62	7.48281e-58	0.828	0.704	DC
FTH1	0.589646	5.1371e-62	1.00512e-57	1	0.998	DC
GPR18	0.251077	1.04187e-61	2.03853e-57	0.206	0.004	DC
PPP1CA	0.418655	1.11368e-60	2.17902e-56	0.914	0.865	DC
UBL7	0.401468	2.29129e-60	4.48313e-56	0.719	0.512	DC
SKAP2	0.422216	3.77838e-60	7.39277e-56	0.584	0.327	DC
TNFAIP8	0.377652	4.73774e-60	9.26986e-56	0.551	0.37	DC
RGS19	0.441902	8.72064e-60	1.70628e-55	0.67	0.433	DC
OFD1	0.391124	9.77574e-60	1.91272e-55	0.596	0.401	DC
TMPO	0.379374	1.70415e-59	3.33435e-55	0.648	0.549	DC
SIVA1	0.479745	1.08389e-58	2.12074e-54	0.936	0.884	DC
UBE2E2	0.323687	2.20311e-58	4.31061e-54	0.408	0.099	DC
ZDHHC12	0.328629	7.69883e-58	1.50635e-53	0.622	0.48	DC
DCTN3	0.400282	1.21966e-57	2.38639e-53	0.79	0.702	DC
LAP3	0.380932	1.22252e-57	2.39199e-53	0.73	0.609	DC
HCLS1	0.400539	2.37263e-57	4.64228e-53	0.678	0.485	DC
C17orf62	0.347962	3.29123e-57	6.43962e-53	0.592	0.44	DC
TCL1A	0.51466	5.55921e-57	1.08771e-52	0.109	0.022	DC
CYSLTR1	0.405103	8.13807e-57	1.59229e-52	0.487	0.165	DC
GABARAPL2	0.416235	3.81766e-56	7.46964e-52	0.888	0.812	DC
ATAD2	0.320271	1.33186e-55	2.60593e-51	0.446	0.309	DC
ARPC5	0.456064	1.59202e-55	3.11495e-51	0.895	0.81	DC
ARHGAP4	0.377935	1.6372e-55	3.20335e-51	0.607	0.363	DC
TSTD1	0.412235	3.26952e-55	6.39715e-51	0.839	0.759	DC
KCNE5	0.443235	3.30288e-55	6.46241e-51	0.382	0.063	DC
TM9SF2	0.319418	1.01081e-54	1.97775e-50	0.461	0.308	DC
MGAT1	0.34503	1.12579e-54	2.20272e-50	0.592	0.423	DC
REEP5	0.321444	1.36859e-54	2.67778e-50	0.506	0.349	DC
CTSC	0.406914	2.60024e-54	5.08763e-50	0.794	0.694	DC
MEF2C	0.41786	4.4595e-54	8.72546e-50	0.64	0.395	DC
IDH2	0.445894	4.8917e-54	9.57109e-50	0.948	0.885	DC
SKA2	0.308354	5.16205e-54	1.01001e-49	0.539	0.451	DC
HMGB2	0.851054	7.39874e-54	1.44764e-49	0.906	0.887	DC
FCHSD2	0.3345	1.5149e-53	2.96406e-49	0.367	0.112	DC
DDAH2	0.516877	2.17793e-53	4.26134e-49	0.809	0.61	DC
LRRFIP1	0.435293	2.5304e-53	4.95099e-49	0.813	0.684	DC
IFI27L2	0.394566	8.252e-53	1.61459e-48	0.629	0.351	DC
NKG7	0.450241	3.09544e-52	6.05654e-48	0.558	0.204	DC
MKI67	0.636037	1.88855e-51	3.69513e-47	0.457	0.284	DC
TRAF3IP3	0.442228	1.95145e-51	3.8182e-47	0.633	0.33	DC
TAP1	0.407736	2.92422e-51	5.72153e-47	0.685	0.511	DC
NAGK	0.351296	3.60048e-51	7.0447e-47	0.524	0.302	DC
FAM111B	0.304759	3.76711e-51	7.37072e-47	0.333	0.089	DC
ARPC1B	0.40987	6.08158e-51	1.18992e-46	0.944	0.928	DC
COX17	0.40735	6.74225e-51	1.31919e-46	0.809	0.679	DC
IKZF1	0.320206	2.30602e-50	4.51196e-46	0.524	0.32	DC
SLC9A3R1	0.347158	2.58172e-50	5.0514e-46	0.581	0.388	DC
AIP	0.344469	2.83133e-50	5.53979e-46	0.599	0.444	DC
NUDT5	0.354276	4.04692e-50	7.9182e-46	0.801	0.691	DC
CAPZB	0.350971	6.81133e-50	1.33271e-45	0.742	0.695	DC
BBX	0.372741	1.28712e-49	2.51837e-45	0.708	0.622	DC
AP1S2	0.398834	1.51828e-49	2.97066e-45	0.603	0.381	DC
KCTD5	0.279183	2.30109e-49	4.50231e-45	0.315	0.105	DC
SASH3	0.31361	3.60722e-49	7.05789e-45	0.371	0.161	DC
CTSS	0.461176	5.38339e-49	1.05331e-44	0.708	0.454	DC
MXD3	0.433011	6.9918e-49	1.36802e-44	0.442	0.191	DC
IL10RB	0.29271	1.08118e-48	2.11544e-44	0.378	0.196	DC
EZR	0.281769	1.25595e-48	2.45738e-44	0.468	0.34	DC
PLAUR	0.271047	1.54157e-48	3.01624e-44	0.303	0.104	DC
HLA-B	0.343621	1.63652e-48	3.20202e-44	1	1	DC
PTMA	0.290041	1.98139e-48	3.87679e-44	1	1	DC
NTAN1	0.251597	2.86165e-48	5.59911e-44	0.307	0.137	DC
TRABD	0.324999	2.93667e-48	5.7459e-44	0.637	0.523	DC
FAM49B	0.299098	3.77548e-48	7.38711e-44	0.622	0.551	DC
ASF1B	0.332553	7.52857e-48	1.47304e-43	0.408	0.268	DC
RHOA	0.410583	8.08646e-48	1.5822e-43	0.959	0.922	DC
ARID5A	0.310869	9.25594e-48	1.81102e-43	0.464	0.286	DC
CCDC109B	0.3155	1.24108e-47	2.4283e-43	0.573	0.424	DC
GNG7	0.30136	1.64904e-47	3.22652e-43	0.352	0.148	DC
RRM2	0.269839	2.1117e-47	4.13175e-43	0.27	0.171	DC
EZH2	0.297423	2.27052e-47	4.44249e-43	0.442	0.281	DC
DNAJC1	0.3558	2.71679e-47	5.31567e-43	0.607	0.414	DC
EVI2B	0.487411	2.97635e-47	5.82354e-43	0.738	0.412	DC
IQGAP1	0.281114	4.00201e-47	7.83033e-43	0.371	0.144	DC
BTG1	0.452244	7.15839e-47	1.40061e-42	0.581	0.354	DC
POU2F2	0.416232	1.86459e-46	3.64826e-42	0.446	0.169	DC
DAB2	0.311927	1.86772e-46	3.65438e-42	0.345	0.107	DC
CCDC107	0.304438	3.12663e-46	6.11756e-42	0.393	0.169	DC
TMEM50A	0.311096	3.80415e-46	7.4432e-42	0.584	0.482	DC
EMB	0.358107	7.53833e-46	1.47495e-41	0.569	0.342	DC
PARK7	0.419765	9.52699e-46	1.86405e-41	0.929	0.903	DC
NAPA	0.302512	1.577e-45	3.08555e-41	0.64	0.503	DC
SARAF	0.395709	2.09737e-45	4.10372e-41	0.933	0.888	DC
SERF2	0.326094	2.96234e-45	5.79612e-41	1	1	DC
ACTR3	0.366916	3.20692e-45	6.27466e-41	0.783	0.663	DC
PCNA	0.471272	3.55593e-45	6.95754e-41	0.742	0.687	DC
ANAPC15	0.32123	5.18317e-45	1.01414e-40	0.648	0.535	DC
COPZ1	0.316258	7.1117e-45	1.39147e-40	0.689	0.585	DC
ZWINT	0.348728	7.24906e-45	1.41835e-40	0.566	0.418	DC
DCK	0.299254	2.53446e-44	4.95892e-40	0.543	0.366	DC
CD2AP	0.261082	6.48053e-44	1.26798e-39	0.341	0.199	DC
GRN	0.381468	7.46708e-44	1.46101e-39	0.685	0.569	DC
DENND6B	0.319712	9.12948e-44	1.78627e-39	0.408	0.132	DC
NDUFA4	0.339978	1.39971e-43	2.73867e-39	0.996	0.99	DC
FUT7	0.37137	1.53374e-43	3.00092e-39	0.419	0.17	DC
SEPT6	0.416586	3.21676e-43	6.29392e-39	0.959	0.864	DC
TRAPPC1	0.34362	3.2581e-43	6.37481e-39	0.888	0.837	DC
UCP2	0.393823	3.61642e-43	7.07588e-39	0.67	0.527	DC
PRKCB	0.351034	7.12359e-43	1.3938e-38	0.498	0.234	DC
MIF4GD	0.330396	8.00356e-43	1.56598e-38	0.618	0.446	DC
SUMO2	0.339729	8.14673e-43	1.59399e-38	1	0.987	DC
RNASET2	0.407369	1.00328e-42	1.96302e-38	0.846	0.733	DC
PSMA4	0.37143	1.27635e-42	2.49731e-38	0.959	0.904	DC
COX8A	0.401731	1.40589e-42	2.75077e-38	0.974	0.944	DC
SYK	0.309999	3.21565e-42	6.29173e-38	0.506	0.329	DC
PHACTR1	0.336783	4.64339e-42	9.08526e-38	0.461	0.211	DC
SRSF10	0.304264	5.63464e-42	1.10247e-37	0.7	0.627	DC
C9orf142	0.331261	5.84673e-42	1.14397e-37	0.727	0.634	DC
ARPC4	0.330405	1.2063e-41	2.36025e-37	0.727	0.614	DC
SNRNP25	0.345622	2.65017e-41	5.18532e-37	0.727	0.611	DC
PARP10	0.277529	2.90591e-41	5.68571e-37	0.348	0.188	DC
LAIR1	0.383279	2.97401e-41	5.81895e-37	0.551	0.233	DC
GNAI2	0.320027	3.32309e-41	6.50195e-37	0.682	0.568	DC
CCDC167	0.278924	3.55606e-41	6.95778e-37	0.513	0.415	DC
SRSF4	0.268014	4.74242e-41	9.27902e-37	0.558	0.438	DC
COPE	0.347335	9.46907e-41	1.85272e-36	0.948	0.923	DC
REPIN1	0.282412	1.02839e-40	2.01214e-36	0.532	0.418	DC
SP110	0.323186	1.26125e-40	2.46776e-36	0.434	0.255	DC
TPM4	0.418195	1.91263e-40	3.74226e-36	0.719	0.442	DC
DHRS7	0.310195	1.96804e-40	3.85067e-36	0.663	0.588	DC
CAP1	0.360483	1.9902e-40	3.89403e-36	0.843	0.807	DC
TUBB	0.690405	4.59416e-40	8.98892e-36	0.963	0.96	DC
HMGB1	0.494935	6.0607e-40	1.18584e-35	1	0.999	DC
CHMP5	0.289167	7.04929e-40	1.37926e-35	0.652	0.598	DC
DNAJC8	0.338576	1.45587e-39	2.84855e-35	0.753	0.612	DC
HINT2	0.326713	1.78821e-39	3.49881e-35	0.76	0.651	DC
CDC42	0.292972	1.78955e-39	3.50143e-35	0.543	0.527	DC
HMGN3	0.351274	2.39309e-39	4.68231e-35	0.963	0.937	DC
GRB2	0.25339	3.81458e-39	7.4636e-35	0.521	0.433	DC
PSME1	0.348298	5.34678e-39	1.04615e-34	0.989	0.977	DC
NDUFV2	0.373929	7.12666e-39	1.3944e-34	0.94	0.854	DC
SH2D3C	0.263074	9.1961e-39	1.79931e-34	0.318	0.077	DC
PPM1K	0.283374	1.11708e-38	2.18568e-34	0.431	0.265	DC
UVRAG	0.267733	1.47449e-38	2.88499e-34	0.401	0.214	DC
H2AFY	0.371586	2.19264e-38	4.29012e-34	0.985	0.984	DC
ITGB2	0.370466	4.62889e-38	9.05688e-34	0.652	0.418	DC
CCDC186	0.2848	5.66854e-38	1.10911e-33	0.375	0.217	DC
PIN1	0.277152	6.82004e-38	1.33441e-33	0.723	0.669	DC
NUSAP1	0.438347	1.12399e-37	2.1992e-33	0.453	0.318	DC
FXYD5	0.370637	1.29821e-37	2.54009e-33	0.989	0.982	DC
COMMD8	0.253032	1.35863e-37	2.6583e-33	0.506	0.373	DC
BCL11A	0.347272	2.17376e-37	4.25318e-33	0.697	0.568	DC
NDUFB4	0.334395	2.98581e-37	5.84204e-33	0.944	0.91	DC
MYL12B	0.353585	3.03369e-37	5.93572e-33	0.974	0.954	DC
HNRNPA2B1	0.398047	3.60614e-37	7.05577e-33	1	0.977	DC
HNRNPM	0.35231	4.08623e-37	7.99512e-33	0.918	0.874	DC
H2AFZ	0.544061	5.29675e-37	1.03636e-32	0.993	0.974	DC
NR3C1	0.282044	6.96616e-37	1.363e-32	0.476	0.334	DC
TMEM109	0.2544	7.97099e-37	1.5596e-32	0.562	0.519	DC
PLEK	0.513115	1.43557e-36	2.80884e-32	0.794	0.555	DC
MND1	0.283582	2.01313e-36	3.93888e-32	0.453	0.32	DC
LSM4	0.35105	2.74795e-36	5.37664e-32	0.936	0.896	DC
IRF2BP2	0.3227	3.10704e-36	6.07923e-32	0.685	0.558	DC
BRK1	0.310529	3.53395e-36	6.91452e-32	0.974	0.96	DC
CLSPN	0.340112	1.30663e-35	2.55655e-31	0.524	0.399	DC
CD47	0.3264	2.36385e-35	4.6251e-31	0.689	0.583	DC
CKLF	0.292696	2.56364e-35	5.01602e-31	0.655	0.545	DC
YWHAB	0.271787	2.81239e-35	5.50272e-31	0.775	0.768	DC
TRIM22	0.323036	2.83449e-35	5.54595e-31	0.472	0.21	DC
PSMB8-AS1	0.314581	5.15049e-35	1.00774e-30	0.584	0.462	DC
WDFY2	0.263254	6.11298e-35	1.19607e-30	0.401	0.216	DC
APOBEC3G	0.256723	6.70156e-35	1.31123e-30	0.438	0.255	DC
CYFIP2	0.2712	7.43586e-35	1.4549e-30	0.367	0.165	DC
TMIGD2	0.31402	9.70612e-35	1.8991e-30	0.558	0.395	DC
TUBA1A	0.350232	9.96428e-35	1.94961e-30	0.64	0.543	DC
TWF2	0.295691	1.55984e-34	3.05199e-30	0.64	0.512	DC
SEC61G	0.391647	5.64891e-34	1.10527e-29	0.921	0.892	DC
UBE2S	0.400461	1.10041e-33	2.15307e-29	0.483	0.452	DC
TMA7	0.313104	1.87984e-33	3.67809e-29	0.996	0.986	DC
ANAPC11	0.341745	1.96655e-33	3.84774e-29	0.929	0.861	DC
CIRBP	0.370266	2.08617e-33	4.08181e-29	0.974	0.941	DC
FEN1	0.322373	4.30555e-33	8.42424e-29	0.637	0.578	DC
CALCOCO2	0.270117	6.34556e-33	1.24157e-28	0.453	0.263	DC
IQGAP2	0.339657	8.88977e-33	1.73937e-28	0.715	0.618	DC
PPP4C	0.267888	2.11177e-32	4.13188e-28	0.787	0.751	DC
CDK1	0.331188	5.37994e-32	1.05264e-27	0.363	0.277	DC
TRA2B	0.310684	8.2307e-32	1.61042e-27	0.843	0.757	DC
ARHGDIA	0.298929	1.11981e-31	2.19102e-27	0.798	0.719	DC
PPP1R14B	0.250781	1.19692e-31	2.3419e-27	0.461	0.367	DC
EIF4G2	0.298582	1.40133e-31	2.74184e-27	0.734	0.629	DC
RAD51AP1	0.273174	1.89886e-31	3.71532e-27	0.464	0.363	DC
SMDT1	0.281441	2.1678e-31	4.24151e-27	0.873	0.871	DC
TMBIM6	0.324116	2.21403e-31	4.33197e-27	0.891	0.838	DC
MIS18BP1	0.294087	4.02337e-31	7.87212e-27	0.633	0.577	DC
SSR4	0.330743	4.55485e-31	8.91202e-27	0.974	0.97	DC
FAM65B	0.263275	8.11025e-31	1.58685e-26	0.408	0.235	DC
ANAPC16	0.280691	1.09369e-30	2.13992e-26	0.764	0.722	DC
KIAA0101	0.506659	2.0633e-30	4.03705e-26	0.899	0.724	DC
CDKN3	0.399303	2.13078e-30	4.16909e-26	0.453	0.347	DC
FAM96B	0.293154	2.60547e-30	5.09786e-26	0.831	0.744	DC
RABAC1	0.331515	3.15559e-30	6.17423e-26	0.85	0.717	DC
PARVG	0.28892	4.30381e-30	8.42084e-26	0.539	0.362	DC
ATP6V0E1	0.316556	4.33315e-30	8.47825e-26	0.944	0.889	DC
OAS1	0.324488	4.33993e-30	8.49151e-26	0.438	0.261	DC
CD37	0.36475	4.39582e-30	8.60086e-26	0.959	0.909	DC
CENPM	0.286092	4.41048e-30	8.62954e-26	0.494	0.395	DC
HNRNPA0	0.317742	6.86103e-30	1.34243e-25	0.944	0.907	DC
SMC4	0.343782	8.67551e-30	1.69745e-25	0.798	0.76	DC
PFN1	0.294315	1.20026e-29	2.34842e-25	0.996	0.999	DC
PSMB3	0.304307	1.51303e-29	2.9604e-25	0.94	0.923	DC
SAT1	0.392022	1.57437e-29	3.08041e-25	0.678	0.503	DC
ACTR2	0.26952	1.60143e-29	3.13335e-25	0.577	0.49	DC
SHFM1	0.277992	2.36049e-29	4.61854e-25	0.948	0.948	DC
SMC2	0.289588	2.74347e-29	5.36787e-25	0.678	0.615	DC
SMC1A	0.279881	2.80099e-29	5.48042e-25	0.603	0.499	DC
YWHAZ	0.255929	3.04498e-29	5.9578e-25	0.712	0.657	DC
HELLS	0.304297	3.99294e-29	7.81258e-25	0.588	0.501	DC
PGLS	0.266852	6.18051e-29	1.20928e-24	0.846	0.832	DC
KIAA0930	0.262293	9.44849e-29	1.84869e-24	0.401	0.191	DC
DEK	0.326354	1.99012e-28	3.89386e-24	0.94	0.933	DC
CD38	0.27546	3.49746e-28	6.84314e-24	0.592	0.462	DC
HNRNPA3	0.305989	4.96153e-28	9.70773e-24	0.936	0.902	DC
PPIB	0.400842	5.14753e-28	1.00717e-23	0.963	0.917	DC
TUBA1B	0.58239	5.68165e-28	1.11167e-23	0.978	0.988	DC
GINS2	0.338202	5.99865e-28	1.1737e-23	0.663	0.541	DC
HSPB11	0.290982	7.28606e-28	1.42559e-23	0.79	0.733	DC
COMMD3	0.274074	8.80129e-28	1.72206e-23	0.805	0.719	DC
ADD3	0.261779	1.37011e-27	2.68075e-23	0.39	0.191	DC
IL16	0.28134	1.55939e-27	3.0511e-23	0.397	0.198	DC
ANP32A	0.272054	1.67987e-27	3.28683e-23	0.779	0.73	DC
RP11-160E2.6	0.254361	2.18443e-26	4.27405e-22	0.375	0.274	DC
NAP1L1	0.293593	2.25621e-26	4.4145e-22	0.996	0.995	DC
HNRNPR	0.252159	2.34587e-26	4.58992e-22	0.764	0.756	DC
EAF2	0.263142	3.63209e-26	7.10656e-22	0.592	0.448	DC
IER2	0.288768	4.171e-26	8.16098e-22	0.551	0.492	DC
BRD2	0.251202	4.45714e-26	8.72084e-22	0.618	0.549	DC
PTTG1	0.45783	1.01709e-25	1.99004e-21	0.742	0.63	DC
TOP1	0.257748	1.61805e-25	3.16588e-21	0.655	0.546	DC
DNAJA1	0.272468	3.2568e-25	6.37225e-21	0.816	0.799	DC
FLT3	0.26	3.4083e-25	6.66868e-21	0.419	0.19	DC
EMP3	0.366535	4.71107e-25	9.21767e-21	0.794	0.488	DC
UBL5	0.289175	7.32918e-25	1.43403e-20	0.955	0.943	DC
C5orf56	0.269511	1.25372e-24	2.45303e-20	0.461	0.264	DC
LSM3	0.294897	1.58585e-24	3.10287e-20	0.944	0.89	DC
IFI16	0.341071	2.37609e-24	4.64905e-20	0.884	0.797	DC
RPA3	0.274998	2.75614e-24	5.39267e-20	0.794	0.715	DC
FKBP2	0.315841	4.34888e-24	8.50903e-20	0.719	0.692	DC
CNTRL	0.276821	4.85907e-24	9.50725e-20	0.629	0.489	DC
ZFP36	0.263752	5.99844e-24	1.17365e-19	0.39	0.16	DC
C9orf16	0.25445	1.01693e-23	1.98973e-19	0.929	0.907	DC
PKM	0.33168	2.28836e-23	4.47741e-19	0.918	0.726	DC
CCNB2	0.279286	9.5615e-23	1.8708e-18	0.333	0.314	DC
HNRNPC	0.270513	1.75219e-22	3.42834e-18	0.996	0.977	DC
MCM5	0.273003	2.08189e-22	4.07342e-18	0.667	0.604	DC
HMMR	0.366061	3.52757e-22	6.90204e-18	0.273	0.179	DC
HNRNPD	0.262915	3.59633e-22	7.03659e-18	0.858	0.794	DC
CD48	0.33516	2.80266e-21	5.48368e-17	0.584	0.361	DC
RBX1	0.260295	2.99561e-21	5.86121e-17	0.955	0.941	DC
POMP	0.269698	6.71143e-21	1.31316e-16	0.963	0.906	DC
KPNA2	0.292809	2.0119e-20	3.93648e-16	0.397	0.351	DC
CD99	0.300186	2.53287e-20	4.9558e-16	0.936	0.899	DC
AIF1	0.316334	3.99186e-20	7.81048e-16	0.97	0.942	DC
COX6A1	0.261946	9.02085e-20	1.76502e-15	0.981	0.953	DC
TYMS	0.334578	1.91074e-19	3.73856e-15	0.749	0.705	DC
LITAF	0.258287	2.77168e-19	5.42308e-15	0.513	0.364	DC
RASGRP2	0.267368	3.15299e-19	6.16914e-15	0.655	0.568	DC
AURKB	0.298514	1.25284e-18	2.45131e-14	0.356	0.228	DC
CENPE	0.252704	1.67911e-18	3.28535e-14	0.243	0.173	DC
HIST1H1C	0.269379	1.79099e-18	3.50425e-14	0.431	0.341	DC
RPL36AL	0.25139	4.02936e-18	7.88384e-14	1	0.997	DC
COX7B	0.252778	4.44098e-18	8.68922e-14	0.959	0.915	DC
MANF	0.2927	8.17484e-18	1.59949e-13	0.685	0.624	DC
MALAT1	0.361875	1.99729e-16	3.90789e-12	1	1	DC
TOP2A	0.401386	8.93122e-16	1.74748e-11	0.393	0.265	DC
DHFR	0.262451	1.41874e-15	2.77591e-11	0.607	0.509	DC
TK1	0.288794	8.98518e-15	1.75804e-10	0.491	0.411	DC
TUBB4B	0.348381	1.05979e-13	2.07359e-09	0.629	0.636	DC
GLIPR1	0.267215	2.19748e-13	4.29959e-09	0.599	0.389	DC
BIRC5	0.304874	8.91123e-13	1.74357e-08	0.472	0.363	DC
HIST1H4C	0.776238	1.6941e-12	3.31468e-08	0.891	0.901	DC
UBE2C	0.376094	5.67121e-08	0.00110963	0.352	0.3	DC
LTB	2.73072	1.90743e-78	3.73208e-74	0.75	0.082	CLP
VPREB1	2.16434	3.56447e-70	6.97424e-66	1	0.124	CLP
CD79A	1.33651	1.13499e-62	2.22072e-58	0.583	0.077	CLP
DNTT	2.80175	2.87756e-53	5.63024e-49	1	0.096	CLP
CD79B	0.97942	2.70798e-36	5.29843e-32	0.667	0.281	CLP
LAT2	1.21573	3.52745e-32	6.9018e-28	1	0.551	CLP
FBXW7	0.772097	5.02661e-32	9.83507e-28	0.667	0.143	CLP
JCHAIN	2.29555	4.50611e-30	8.81666e-26	0.792	0.02	CLP
ZCCHC7	0.681526	1.57783e-27	3.08719e-23	0.5	0.31	CLP
UHRF1	0.897393	4.68849e-26	9.1735e-22	0.792	0.297	CLP
IL7R	0.860689	4.28154e-25	8.37727e-21	0.542	0.005	CLP
GPR171	0.731753	9.91396e-25	1.93977e-20	0.5	0.007	CLP
DDIT4	1.23216	2.3614e-24	4.62031e-20	0.667	0.085	CLP
CORO1A	1.30423	4.69276e-24	9.18185e-20	1	0.63	CLP
BLNK	1.09323	5.6835e-24	1.11203e-19	0.833	0.046	CLP
HHIP-AS1	0.763111	1.87587e-22	3.67033e-18	0.5	0.036	CLP
LAIR1	0.908939	8.24983e-22	1.61416e-17	0.667	0.242	CLP
C5orf56	0.735567	2.14391e-21	4.19477e-17	0.667	0.269	CLP
SOCS2	0.924834	3.2962e-21	6.44935e-17	0.792	0.54	CLP
EVL	0.7431	4.8017e-21	9.395e-17	0.708	0.309	CLP
CD99	0.95828	1.36681e-20	2.67431e-16	1	0.9	CLP
LST1	1.16562	2.08291e-20	4.07543e-16	0.958	0.795	CLP
REEP5	0.684551	2.7509e-19	5.38242e-15	0.792	0.352	CLP
TCF4	0.915089	3.0142e-19	5.89759e-15	0.917	0.516	CLP
TSC22D4	0.722516	4.65554e-19	9.10904e-15	0.958	0.62	CLP
ACTG1	0.986206	2.12673e-18	4.16117e-14	1	0.998	CLP
TMSB4X	1.30636	2.87279e-18	5.6209e-14	1	0.987	CLP
ID3	0.811842	1.48205e-17	2.89977e-13	0.333	0.002	CLP
LSP1	1.03832	1.94805e-17	3.81155e-13	0.875	0.613	CLP
MZB1	1.14276	1.13074e-16	2.2124e-12	0.958	0.555	CLP
LDLRAD4	0.632587	5.79126e-16	1.13312e-11	0.667	0.125	CLP
CD53	0.826444	6.8542e-16	1.34109e-11	0.958	0.696	CLP
SMAGP	0.450499	1.45746e-15	2.85167e-11	0.333	0.059	CLP
IGHM	0.746561	1.08543e-14	2.12375e-10	0.708	0.187	CLP
CD2	0.624746	3.03487e-14	5.93803e-10	0.5	0.02	CLP
CAPG	0.760016	7.65012e-14	1.49682e-09	0.833	0.409	CLP
PPP1R18	0.724923	9.35898e-14	1.83118e-09	0.875	0.391	CLP
PSME1	0.636231	9.85147e-14	1.92754e-09	1	0.977	CLP
PAG1	0.560766	1.09588e-13	2.14421e-09	0.583	0.106	CLP
CYFIP2	0.57127	2.4078e-13	4.71109e-09	0.583	0.17	CLP
MS4A1	0.481845	3.33363e-13	6.52258e-09	0.292	0.002	CLP
BCL11A	0.646932	3.72722e-13	7.29268e-09	0.875	0.571	CLP
TMSB10	0.713318	7.51883e-13	1.47113e-08	1	0.999	CLP
PTMA	0.491869	1.20839e-12	2.36433e-08	1	1	CLP
PLEKHO1	0.521035	1.57515e-12	3.08194e-08	0.583	0.232	CLP
BIN1	0.67326	1.7653e-12	3.45398e-08	0.875	0.382	CLP
MIR181A1HG	0.584392	1.8625e-12	3.64417e-08	0.625	0.346	CLP
CXCR4	0.870861	4.85503e-12	9.49936e-08	0.875	0.47	CLP
UBASH3B	0.401144	5.60467e-12	1.09661e-07	0.375	0.043	CLP
DDX5	0.63393	9.66361e-12	1.89078e-07	1	0.893	CLP
RGS19	0.595764	1.16909e-11	2.28745e-07	0.625	0.44	CLP
SH3KBP1	0.572472	1.22107e-11	2.38915e-07	0.792	0.359	CLP
ADA	0.580418	1.26971e-11	2.48432e-07	0.583	0.319	CLP
MYLK	0.381078	1.32518e-11	2.59285e-07	0.375	0.026	CLP
VPREB3	0.686316	1.91111e-11	3.73928e-07	0.208	0.001	CLP
CD22	0.376919	3.04348e-11	5.95487e-07	0.208	0.004	CLP
GSTO1	0.587621	3.44469e-11	6.73988e-07	0.958	0.89	CLP
NEGR1	0.46917	4.28517e-11	8.38436e-07	0.417	0.105	CLP
TBCD	0.380144	4.79431e-11	9.38055e-07	0.417	0.144	CLP
CASP1	0.547043	5.28095e-11	1.03327e-06	0.667	0.273	CLP
SEPT1	0.556977	5.30049e-11	1.03709e-06	0.625	0.227	CLP
ITM2C	0.661028	6.52752e-11	1.27717e-06	1	0.67	CLP
IQSEC1	0.333724	6.65073e-11	1.30128e-06	0.25	0.069	CLP
FAM134B	0.369128	8.46763e-11	1.65678e-06	0.375	0.036	CLP
HPS4	0.412644	9.25155e-11	1.81016e-06	0.542	0.354	CLP
MYCBP2	0.577211	9.70812e-11	1.89949e-06	0.708	0.559	CLP
EBF1	0.434237	1.22429e-10	2.39545e-06	0.208	0.002	CLP
POLR2C	0.458672	1.45577e-10	2.84836e-06	0.625	0.481	CLP
CD48	0.665831	1.5987e-10	3.12802e-06	0.833	0.367	CLP
RASD1	0.490213	2.60078e-10	5.08869e-06	0.375	0.016	CLP
GART	0.395877	2.76685e-10	5.41361e-06	0.542	0.364	CLP
PSME2	0.621351	3.91262e-10	7.65544e-06	0.958	0.937	CLP
IGLL1	1.05749	4.42156e-10	8.65122e-06	1	0.877	CLP
SNRPN	0.42377	6.07131e-10	1.18791e-05	0.5	0.445	CLP
RNASEH2B	0.540397	1.04471e-09	2.04407e-05	0.917	0.857	CLP
PPP1CA	0.525646	1.24761e-09	2.44108e-05	0.958	0.866	CLP
LY86	0.445211	1.3261e-09	2.59466e-05	0.458	0.036	CLP
UBC	0.658006	1.8916e-09	3.70111e-05	0.958	0.927	CLP
CD96	0.306645	2.63697e-09	5.15949e-05	0.25	0.026	CLP
CD200	0.446473	2.66082e-09	5.20616e-05	0.458	0.159	CLP
EBLN3	0.344143	2.76925e-09	5.41831e-05	0.375	0.229	CLP
H2AFY	0.611852	3.0882e-09	6.04238e-05	1	0.984	CLP
NREP	0.565285	3.17872e-09	6.21948e-05	0.708	0.522	CLP
LRMP	0.461423	3.98523e-09	7.79751e-05	0.667	0.24	CLP
USP18	0.37975	4.23732e-09	8.29074e-05	0.417	0.214	CLP
C12orf75	0.581042	6.48818e-09	0.000126948	0.75	0.234	CLP
UBE2E2	0.32203	6.63262e-09	0.000129774	0.25	0.109	CLP
KIAA0125	0.735202	7.20047e-09	0.000140884	0.958	0.838	CLP
MAPKAPK3	0.387897	8.03103e-09	0.000157135	0.583	0.638	CLP
LPXN	0.367757	8.624e-09	0.000168737	0.417	0.045	CLP
HHIP	0.3158	9.78203e-09	0.000191395	0.167	0.007	CLP
IL2RG	0.595632	1.06347e-08	0.000208079	0.792	0.525	CLP
B3GNT2	0.399956	1.09616e-08	0.000214474	0.5	0.276	CLP
MORF4L1	0.42333	1.22096e-08	0.000238894	0.917	0.937	CLP
MXD3	0.633847	1.44108e-08	0.000281962	0.458	0.198	CLP
MEF2C	0.497754	1.66475e-08	0.000325725	0.583	0.402	CLP
TARS	0.295877	2.42466e-08	0.00047441	0.417	0.423	CLP
ARPC5L	0.363109	2.52272e-08	0.000493595	0.625	0.588	CLP
RGL4	0.554178	2.72078e-08	0.000532348	0.583	0.289	CLP
FUT7	0.489494	3.68147e-08	0.000720316	0.583	0.176	CLP
YWHAZ	0.437917	3.869e-08	0.000757009	0.708	0.659	CLP
CCNI	0.490435	3.94575e-08	0.000772025	1	0.981	CLP
CD52	0.685159	4.14514e-08	0.000811039	0.958	0.606	CLP
STK17B	0.361746	4.74631e-08	0.000928663	0.375	0.11	CLP
JUP	0.39554	4.93917e-08	0.000966398	0.417	0.173	CLP
HNRNPK	0.506336	5.27361e-08	0.00103183	1	0.956	CLP
LY9	0.303586	5.70783e-08	0.00111679	0.208	0.006	CLP
RHPN1	0.432422	6.07345e-08	0.00118833	0.542	0.231	CLP
MED13L	0.450597	6.40214e-08	0.00125264	0.5	0.288	CLP
ANXA11	0.328815	6.5839e-08	0.00128821	0.667	0.677	CLP
AKAP17A	0.279352	7.07665e-08	0.00138462	0.333	0.278	CLP
SPNS3	0.553739	1.10443e-07	0.00216093	0.625	0.257	CLP
NAPA	0.254515	1.13649e-07	0.00222366	0.458	0.507	CLP
GLRX	0.596275	1.15159e-07	0.00225321	0.75	0.675	CLP
PLIN3	0.486651	1.2097e-07	0.0023669	0.625	0.502	CLP
MCM5	0.268792	1.38365e-07	0.00270724	0.458	0.607	CLP
CCND3	0.521838	1.51846e-07	0.00297101	0.75	0.397	CLP
CD74	0.806958	1.61255e-07	0.00315512	1	0.969	CLP
COPZ1	0.25708	1.68932e-07	0.00330533	0.542	0.589	CLP
IRF1	0.497554	1.84532e-07	0.00361054	0.625	0.338	CLP
MYL12B	0.321906	1.94673e-07	0.00380898	0.833	0.955	CLP
NBEAL2	0.280016	2.96046e-07	0.00579244	0.292	0.098	CLP
MAD2L1	0.259831	3.18158e-07	0.00622509	0.458	0.538	CLP
SUCNR1	0.411048	3.20247e-07	0.00626595	0.333	0.063	CLP
SLC8A1-AS1	0.288776	3.51734e-07	0.00688203	0.125	0.003	CLP
PRKD2	0.301645	4.10774e-07	0.0080372	0.333	0.114	CLP
WDR83	0.276202	4.53471e-07	0.00887261	0.375	0.207	CLP
MAN1A1	0.375619	4.69113e-07	0.00917867	0.417	0.2	CLP
FCER1A	2.07435	0	0	0.98	0.211	MEP
PLEK	0.892	0	0	0.895	0.528	MEP
SOD2	0.730842	0	0	0.898	0.521	MEP
PBX1	0.702179	0	0	0.803	0.271	MEP
RNF130	0.654396	0	0	0.983	0.812	MEP
TAGLN2	0.694003	8.14909e-292	1.59445e-287	0.996	0.941	MEP
LIMS1	0.651029	1.91654e-283	3.7499e-279	0.904	0.614	MEP
PDLIM1	0.679317	2.02963e-279	3.97117e-275	0.897	0.663	MEP
TMEM246	0.510858	4.95869e-247	9.70218e-243	0.694	0.273	MEP
STXBP6	0.644538	2.56335e-246	5.01545e-242	0.597	0.107	MEP
DAD1	0.64971	4.57769e-230	8.95672e-226	0.95	0.863	MEP
HEMGN	0.631248	7.90199e-227	1.5461e-222	0.787	0.265	MEP
MINPP1	0.515436	4.15982e-215	8.13911e-211	0.755	0.292	MEP
GATA1	0.468899	2.30261e-214	4.50528e-210	0.818	0.27	MEP
HACD1	0.511364	8.03394e-205	1.57192e-200	0.792	0.51	MEP
FERMT3	0.523026	1.49254e-195	2.9203e-191	0.763	0.525	MEP
IL1B	0.62301	2.9731e-184	5.81716e-180	0.879	0.57	MEP
H3F3A	0.349129	5.88916e-176	1.15227e-171	1	1	MEP
KLF1	0.388676	8.58808e-174	1.68034e-169	0.835	0.341	MEP
TESPA1	0.465566	8.82977e-172	1.72763e-167	0.808	0.426	MEP
CKB	0.538079	6.99698e-169	1.36903e-164	0.598	0.215	MEP
C2orf88	0.36597	8.78455e-165	1.71878e-160	0.535	0.172	MEP
CTNNBL1	0.420652	1.53759e-155	3.00845e-151	0.744	0.369	MEP
SLC40A1	0.459564	6.04378e-154	1.18253e-149	0.763	0.395	MEP
HPGDS	0.466898	7.82961e-154	1.53194e-149	0.643	0.293	MEP
SDPR	0.429767	2.42005e-152	4.73507e-148	0.563	0.267	MEP
RGS18	0.318548	3.06971e-151	6.00619e-147	0.319	0.037	MEP
GATA2	0.523382	3.01351e-147	5.89623e-143	0.828	0.472	MEP
KIF2A	0.441865	3.96369e-143	7.75535e-139	0.727	0.489	MEP
DUSP23	0.429395	4.91049e-136	9.60787e-132	0.925	0.776	MEP
ITGA2B	0.667431	5.10612e-135	9.99064e-131	0.493	0.19	MEP
C6orf25	0.290519	2.97211e-132	5.81524e-128	0.358	0.063	MEP
DTD1	0.379662	3.27916e-130	6.41601e-126	0.782	0.538	MEP
TPM1	0.484149	7.57072e-126	1.48129e-121	0.679	0.342	MEP
MPP1	0.384006	4.15584e-121	8.13131e-117	0.865	0.625	MEP
PTGS1	0.262252	3.05027e-111	5.96816e-107	0.405	0.118	MEP
FAM19A2	0.3917	3.97502e-110	7.77753e-106	0.455	0.173	MEP
TGFB1	0.372541	9.34292e-102	1.82804e-97	0.712	0.527	MEP
GJA4	0.261376	1.35752e-101	2.65613e-97	0.346	0.076	MEP
LAPTM4B	0.410984	1.07056e-98	2.09466e-94	0.887	0.717	MEP
CD84	0.326673	2.26691e-92	4.43544e-88	0.635	0.32	MEP
BIN2	0.343349	2.24969e-91	4.40174e-87	0.743	0.503	MEP
ZBTB16	0.267818	3.52594e-91	6.89885e-87	0.518	0.201	MEP
TLN1	0.338213	5.82315e-89	1.13936e-84	0.795	0.581	MEP
FTH1	0.305043	4.46097e-87	8.72834e-83	1	0.997	MEP
NAA38	0.352653	2.11816e-84	4.14438e-80	0.956	0.875	MEP
PKIG	0.278647	5.08512e-83	9.94955e-79	0.541	0.259	MEP
SERPINB1	0.347375	1.66201e-82	3.25189e-78	0.999	0.964	MEP
MEF2C	0.302992	3.46923e-73	6.7879e-69	0.605	0.382	MEP
MARCKSL1	0.350135	2.10857e-72	4.12563e-68	0.854	0.59	MEP
MYCT1	0.272048	4.92068e-72	9.62779e-68	0.534	0.235	MEP
CD164	0.339246	7.43813e-72	1.45535e-67	0.918	0.762	MEP
PDZD8	0.286668	9.83194e-69	1.92372e-64	0.646	0.368	MEP
VASP	0.27661	1.58805e-68	3.10719e-64	0.641	0.411	MEP
ACTB	0.333277	1.42538e-66	2.7889e-62	1	1	MEP
MLLT11	0.255559	3.58693e-64	7.01818e-60	0.647	0.409	MEP
LEPROT	0.286921	1.31901e-62	2.58077e-58	0.823	0.631	MEP
CCDC28B	0.26483	2.47689e-62	4.84629e-58	0.657	0.443	MEP
ENSA	0.263463	2.27614e-59	4.4535e-55	0.926	0.836	MEP
CAPZA2	0.25913	4.26147e-59	8.338e-55	0.813	0.615	MEP
ZFP36L1	0.32473	6.02328e-59	1.17851e-54	0.551	0.287	MEP
SH3BGRL	0.25076	2.66197e-58	5.20841e-54	0.959	0.868	MEP
PARVB	0.264482	3.30916e-53	6.47469e-49	0.672	0.478	MEP
CD69	0.348812	1.59544e-51	3.12164e-47	0.51	0.294	MEP
MRPL16	0.333038	1.1213e-50	2.19394e-46	0.882	0.825	MEP
DDAH2	0.277816	1.13193e-49	2.21474e-45	0.798	0.597	MEP
PIM1	0.291659	1.91227e-49	3.74154e-45	0.68	0.481	MEP
CD63	0.280371	6.73777e-48	1.31831e-43	0.93	0.888	MEP
SOCS2	0.260614	8.31423e-47	1.62676e-42	0.726	0.521	MEP
KCNQ1OT1	0.277881	4.96687e-43	9.71818e-39	0.52	0.304	MEP
TMSB4X	0.481719	1.75573e-27	3.43526e-23	1	0.985	MEP
HIST3H2A	0.271734	4.66818e-19	9.13377e-15	0.605	0.484	MEP
FOS	0.310376	3.14273e-18	6.14907e-14	0.546	0.46	MEP
UBE2C	0.274676	2.60902e-14	5.1048e-10	0.394	0.292	MEP
HBB	3.21424	0	0	0.984	0.788	Erythroid
HBD	2.53122	0	0	0.964	0.28	Erythroid
CA1	2.1619	0	0	0.861	0.111	Erythroid
BLVRB	1.97831	0	0	0.997	0.539	Erythroid
APOC1	1.69426	0	0	0.932	0.081	Erythroid
S100A6	1.65605	0	0	1	0.915	Erythroid
AHSP	1.61633	0	0	0.629	0.053	Erythroid
MPC2	1.50606	0	0	0.999	0.822	Erythroid
FAM178B	1.32929	0	0	0.798	0.042	Erythroid
KLF1	1.27499	0	0	0.994	0.236	Erythroid
S100A4	1.18557	0	0	0.997	0.857	Erythroid
REXO2	1.11163	0	0	0.982	0.625	Erythroid
PRDX2	1.08542	0	0	0.992	0.841	Erythroid
KCNH2	1.07221	0	0	0.857	0.058	Erythroid
IFI27	1.06661	0	0	0.571	0.065	Erythroid
EMP3	1.03359	0	0	0.984	0.375	Erythroid
CNRIP1	1.01137	0	0	0.972	0.11	Erythroid
GATA1	0.989251	0	0	0.976	0.158	Erythroid
TMEM14C	0.962462	0	0	0.991	0.733	Erythroid
ATPIF1	0.933144	0	0	0.976	0.774	Erythroid
FTH1	0.900436	0	0	1	0.997	Erythroid
HBA1	0.893591	0	0	0.52	0.072	Erythroid
GLRX	0.873532	0	0	0.931	0.611	Erythroid
HBQ1	0.855595	0	0	0.877	0.086	Erythroid
SMIM1	0.84305	0	0	0.908	0.105	Erythroid
UROD	0.807407	0	0	0.992	0.783	Erythroid
FBXO7	0.788676	0	0	0.986	0.56	Erythroid
TMEM14B	0.784676	0	0	0.993	0.812	Erythroid
LMNA	0.784326	0	0	0.721	0.034	Erythroid
NOP10	0.749958	0	0	0.994	0.886	Erythroid
CYTL1	0.74547	0	0	0.955	0.364	Erythroid
NMU	0.712036	0	0	0.485	0.015	Erythroid
EPCAM	0.694146	0	0	0.698	0.109	Erythroid
CA2	0.691921	0	0	0.707	0.057	Erythroid
TFR2	0.682089	0	0	0.901	0.174	Erythroid
SYNGR1	0.658174	0	0	0.872	0.643	Erythroid
HES6	0.652877	0	0	0.724	0.025	Erythroid
LINC00152	0.645969	0	0	0.976	0.493	Erythroid
PPP1R14A	0.643982	0	0	0.761	0.039	Erythroid
LXN	0.642694	0	0	0.867	0.249	Erythroid
EIF5A	0.63705	0	0	0.993	0.841	Erythroid
SNCA	0.625947	0	0	0.954	0.513	Erythroid
NME4	0.613071	0	0	0.989	0.845	Erythroid
FHL2	0.612324	0	0	0.871	0.134	Erythroid
UBAC1	0.601319	0	0	0.823	0.198	Erythroid
PRELID1	0.594819	0	0	0.995	0.888	Erythroid
UROS	0.586458	0	0	0.968	0.598	Erythroid
MPST	0.582032	0	0	0.984	0.632	Erythroid
TESC	0.553505	0	0	0.866	0.176	Erythroid
MRPL52	0.553481	0	0	0.972	0.643	Erythroid
TPGS2	0.552908	0	0	0.95	0.548	Erythroid
TPM1	0.549814	0	0	0.906	0.24	Erythroid
CAST	0.546946	0	0	0.825	0.255	Erythroid
HEBP1	0.546545	0	0	0.903	0.51	Erythroid
HSPE1	0.534276	0	0	0.993	0.929	Erythroid
GAL	0.529665	0	0	0.555	0.018	Erythroid
HSP90AA1	0.52428	0	0	0.999	0.995	Erythroid
HNRNPAB	0.52385	0	0	0.961	0.629	Erythroid
MIR4435-2HG	0.523832	0	0	0.893	0.206	Erythroid
BOLA3	0.522833	0	0	0.914	0.534	Erythroid
GFI1B	0.520127	0	0	0.849	0.257	Erythroid
DNPH1	0.518538	0	0	0.98	0.744	Erythroid
MARCKSL1	0.517098	0	0	0.937	0.534	Erythroid
HMGB1	0.512451	0	0	0.999	0.999	Erythroid
TMEM141	0.50667	0	0	0.876	0.392	Erythroid
HMBS	0.504821	0	0	0.823	0.235	Erythroid
SMIM10	0.498505	0	0	0.912	0.399	Erythroid
PLIN2	0.495698	0	0	0.831	0.21	Erythroid
ITGA2B	0.493072	0	0	0.747	0.086	Erythroid
SLIRP	0.487747	0	0	0.978	0.792	Erythroid
FCGRT	0.486538	0	0	0.852	0.301	Erythroid
FSCN1	0.47956	0	0	0.882	0.331	Erythroid
ZFP36L1	0.479207	0	0	0.769	0.197	Erythroid
DNAJC9	0.479111	0	0	0.969	0.653	Erythroid
NDUFB9	0.476017	0	0	0.999	0.938	Erythroid
ANK1	0.475023	0	0	0.749	0.028	Erythroid
MRPS34	0.471272	0	0	0.979	0.78	Erythroid
SLC25A39	0.469949	0	0	0.949	0.622	Erythroid
ISOC2	0.468882	0	0	0.929	0.569	Erythroid
TSC22D1	0.467677	0	0	0.919	0.476	Erythroid
EPOR	0.466075	0	0	0.755	0.077	Erythroid
YBX1	0.460929	0	0	0.999	0.998	Erythroid
MRPS15	0.45807	0	0	0.98	0.78	Erythroid
MRPL12	0.45756	0	0	0.971	0.721	Erythroid
ALDH1A1	0.455786	0	0	0.901	0.428	Erythroid
POLR2F	0.451084	0	0	0.975	0.764	Erythroid
LYAR	0.450852	0	0	0.898	0.453	Erythroid
APOBEC3C	0.447591	0	0	0.897	0.405	Erythroid
TFRC	0.446423	0	0	0.742	0.149	Erythroid
MAL	0.443313	0	0	0.587	0.121	Erythroid
CISD2	0.441947	0	0	0.938	0.508	Erythroid
ARV1	0.43881	0	0	0.845	0.341	Erythroid
STK25	0.433005	0	0	0.838	0.332	Erythroid
SLC25A37	0.429347	0	0	0.837	0.338	Erythroid
BLVRA	0.428665	0	0	0.899	0.449	Erythroid
FECH	0.427859	0	0	0.736	0.127	Erythroid
PVT1	0.426222	0	0	0.671	0.052	Erythroid
FXN	0.426016	0	0	0.917	0.39	Erythroid
PARVB	0.425747	0	0	0.904	0.394	Erythroid
C1QBP	0.424804	0	0	0.995	0.955	Erythroid
SOD1	0.423365	0	0	0.998	0.974	Erythroid
PCCB	0.41946	0	0	0.849	0.328	Erythroid
NARF	0.419339	0	0	0.886	0.419	Erythroid
STRADB	0.40179	0	0	0.816	0.23	Erythroid
CD36	0.390072	0	0	0.57	0.025	Erythroid
RFESD	0.389195	0	0	0.615	0.062	Erythroid
HK1	0.382694	0	0	0.728	0.143	Erythroid
LPCAT3	0.382126	0	0	0.753	0.202	Erythroid
MOSPD3	0.378424	0	0	0.731	0.154	Erythroid
MT-CO3	0.377069	0	0	0.999	1	Erythroid
PNMT	0.375667	0	0	0.616	0.031	Erythroid
MINPP1	0.371744	0	0	0.787	0.222	Erythroid
HIGD1A	0.370958	0	0	0.815	0.285	Erythroid
CD82	0.370382	0	0	0.875	0.347	Erythroid
CASP3	0.358832	0	0	0.766	0.2	Erythroid
TMEM56	0.352816	0	0	0.461	0.006	Erythroid
PKIG	0.3493	0	0	0.763	0.166	Erythroid
PYCR1	0.347219	0	0	0.72	0.21	Erythroid
HDAC7	0.33848	0	0	0.756	0.155	Erythroid
RILP	0.334181	0	0	0.769	0.208	Erythroid
APOE	0.331661	0	0	0.484	0.007	Erythroid
MT-CO2	0.325993	0	0	0.999	1	Erythroid
ALAD	0.324242	0	0	0.71	0.153	Erythroid
HAGH	0.321941	0	0	0.671	0.153	Erythroid
PTMA	0.319474	0	0	1	1	Erythroid
NMNAT3	0.315534	0	0	0.706	0.166	Erythroid
TSPAN17	0.309413	0	0	0.542	0.081	Erythroid
RCL1	0.308179	0	0	0.716	0.166	Erythroid
DLEU1	0.305441	0	0	0.766	0.252	Erythroid
TST	0.299813	0	0	0.606	0.057	Erythroid
GYPA	0.298495	0	0	0.344	0.006	Erythroid
MBOAT2	0.296061	0	0	0.672	0.139	Erythroid
HBS1L	0.295551	0	0	0.758	0.234	Erythroid
DHRS11	0.293531	0	0	0.687	0.156	Erythroid
FAM118A	0.288161	0	0	0.74	0.228	Erythroid
HSD3B7	0.286065	0	0	0.512	0.072	Erythroid
ICAM4	0.284866	0	0	0.723	0.216	Erythroid
AK1	0.284603	0	0	0.521	0.042	Erythroid
CDC42BPA	0.277666	0	0	0.684	0.186	Erythroid
RPL8	0.274356	0	0	1	1	Erythroid
SRRD	0.270558	0	0	0.63	0.13	Erythroid
CTSL	0.270036	0	0	0.471	0.008	Erythroid
TUBB2A	0.268287	0	0	0.406	0.007	Erythroid
RHAG	0.262311	0	0	0.409	0.006	Erythroid
LDB1	0.260575	0	0	0.593	0.083	Erythroid
CCDC112	0.260173	0	0	0.718	0.225	Erythroid
AMMECR1	0.259657	0	0	0.578	0.08	Erythroid
SLC39A8	0.346158	0	0	0.832	0.332	Erythroid
PPIA	0.350652	0	0	0.999	0.999	Erythroid
HTRA2	0.330526	0	0	0.86	0.363	Erythroid
UQCR10	0.409618	0	0	0.992	0.929	Erythroid
TUFM	0.409117	0	0	0.994	0.907	Erythroid
PLA2G12A	0.304384	0	0	0.743	0.246	Erythroid
NDUFS5	0.435622	0	0	0.997	0.975	Erythroid
CYC1	0.428108	0	0	0.984	0.823	Erythroid
ENG	0.278014	0	0	0.625	0.158	Erythroid
UQCRQ	0.458213	0	0	0.99	0.903	Erythroid
ATP5G3	0.38833	0	3.9287e-308	1	0.986	Erythroid
YIF1B	0.299123	0	4.35557e-308	0.818	0.324	Erythroid
TPI1	0.444686	0	9.03822e-306	0.995	0.95	Erythroid
HMGA1	0.388068	0	2.19504e-305	0.998	0.968	Erythroid
CTNNBL1	0.28058	6.40678e-308	1.25355e-303	0.793	0.307	Erythroid
SLC39A4	0.376638	1.56001e-307	3.05232e-303	0.876	0.406	Erythroid
MRPL14	0.397373	4.76613e-307	9.3254e-303	0.951	0.61	Erythroid
CD320	0.311192	3.70139e-306	7.24213e-302	0.742	0.252	Erythroid
GPX4	0.377845	1.08046e-302	2.11403e-298	0.996	0.949	Erythroid
MGST2	0.430159	9.5712e-301	1.8727e-296	0.959	0.688	Erythroid
SIGMAR1	0.305164	2.34257e-300	4.58347e-296	0.756	0.27	Erythroid
RRP7A	0.442133	1.39866e-299	2.73662e-295	0.925	0.554	Erythroid
PDCD4	0.335993	2.33475e-294	4.56816e-290	0.861	0.387	Erythroid
GRPEL1	0.277687	4.96444e-293	9.71342e-289	0.723	0.247	Erythroid
PHB	0.41115	7.28177e-293	1.42475e-288	0.987	0.861	Erythroid
UBE2F	0.25695	1.11758e-292	2.18666e-288	0.799	0.327	Erythroid
FKBP8	0.385317	4.88832e-288	9.56449e-284	0.981	0.827	Erythroid
TRAP1	0.360465	2.58163e-287	5.05122e-283	0.835	0.374	Erythroid
RAN	0.399763	3.33998e-286	6.535e-282	1	0.99	Erythroid
ATP5J2	0.406366	9.9277e-286	1.94245e-281	0.992	0.926	Erythroid
GNB2	0.298019	2.59965e-285	5.08648e-281	0.834	0.362	Erythroid
CENPF	0.426216	3.76287e-285	7.36242e-281	0.857	0.39	Erythroid
NDFIP1	0.357949	1.00719e-281	1.97066e-277	0.872	0.424	Erythroid
COX7B	0.417959	1.31589e-279	2.57467e-275	0.992	0.897	Erythroid
PPOX	0.250574	3.05883e-278	5.9849e-274	0.645	0.196	Erythroid
CMAS	0.256092	1.53921e-276	3.01162e-272	0.803	0.342	Erythroid
CCDC28B	0.259669	1.63765e-276	3.20422e-272	0.829	0.371	Erythroid
NDUFA6	0.408013	2.74297e-276	5.36689e-272	0.934	0.603	Erythroid
GLRX3	0.371697	4.32093e-274	8.45434e-270	0.925	0.547	Erythroid
NME1	0.439087	3.56331e-272	6.97198e-268	0.99	0.882	Erythroid
UCP2	0.33607	2.31736e-270	4.53415e-266	0.884	0.443	Erythroid
GADD45GIP1	0.38279	1.16132e-268	2.27223e-264	0.987	0.879	Erythroid
TAF9	0.39836	3.27566e-268	6.40915e-264	0.904	0.54	Erythroid
CST3	0.394419	4.06157e-268	7.94687e-264	0.976	0.684	Erythroid
AKR1C3	0.318467	2.60807e-267	5.10295e-263	0.823	0.365	Erythroid
HMGN5	0.403117	2.04985e-266	4.01074e-262	0.921	0.562	Erythroid
TXNL1	0.378427	1.41376e-265	2.76616e-261	0.969	0.694	Erythroid
ATP5B	0.358588	2.86526e-265	5.60617e-261	0.997	0.969	Erythroid
PA2G4	0.383036	8.26678e-263	1.61748e-258	0.996	0.908	Erythroid
MRPL37	0.391766	4.94948e-262	9.68416e-258	0.95	0.662	Erythroid
CENPU	0.324152	1.17319e-261	2.29546e-257	0.831	0.38	Erythroid
DECR1	0.369093	1.96802e-261	3.85063e-257	0.929	0.556	Erythroid
UQCC2	0.387532	5.20251e-258	1.01792e-253	0.951	0.656	Erythroid
HSPD1	0.4006	2.22675e-257	4.35686e-253	0.995	0.944	Erythroid
SNRPG	0.393979	1.40941e-255	2.75766e-251	0.992	0.904	Erythroid
OAT	0.335734	1.3191e-254	2.58095e-250	0.826	0.387	Erythroid
POLR2E	0.368317	2.83078e-254	5.53869e-250	0.939	0.607	Erythroid
GADD45A	0.320418	3.10303e-254	6.07139e-250	0.865	0.428	Erythroid
CYCS	0.432591	7.3923e-254	1.44638e-249	0.962	0.759	Erythroid
RNH1	0.366353	2.76365e-253	5.40735e-249	0.887	0.489	Erythroid
NFIA	0.271987	4.68535e-251	9.16735e-247	0.774	0.329	Erythroid
C17orf89	0.402498	8.40237e-251	1.64401e-246	0.966	0.762	Erythroid
PRC1	0.263658	1.62742e-250	3.18421e-246	0.647	0.217	Erythroid
TIMP1	0.360359	9.17271e-250	1.79473e-245	0.861	0.43	Erythroid
STRA13	0.400437	5.33059e-249	1.04298e-244	0.898	0.557	Erythroid
MPDU1	0.312328	5.91783e-249	1.15788e-244	0.849	0.417	Erythroid
GAR1	0.316027	8.36992e-249	1.63766e-244	0.873	0.447	Erythroid
MRPS25	0.352411	2.73233e-248	5.34607e-244	0.91	0.533	Erythroid
TXN2	0.356354	5.61044e-248	1.09774e-243	0.969	0.729	Erythroid
KIAA0101	0.453035	7.08188e-247	1.38564e-242	0.977	0.668	Erythroid
DPM2	0.274569	1.12866e-246	2.20833e-242	0.797	0.355	Erythroid
GBAS	0.313583	4.57354e-246	8.94859e-242	0.835	0.402	Erythroid
POMP	0.36818	2.02659e-242	3.96522e-238	0.984	0.889	Erythroid
BOP1	0.256128	2.26968e-241	4.44086e-237	0.797	0.361	Erythroid
UBE2S	0.407524	1.94512e-240	3.80581e-236	0.795	0.368	Erythroid
NDUFAB1	0.360577	2.97579e-240	5.82243e-236	0.98	0.87	Erythroid
ECH1	0.356638	1.16045e-239	2.27055e-235	0.977	0.862	Erythroid
TIMM50	0.300065	1.20529e-237	2.35827e-233	0.824	0.396	Erythroid
COA1	0.293702	6.4411e-236	1.26027e-231	0.848	0.426	Erythroid
TIMM13	0.347707	3.88763e-235	7.60653e-231	0.995	0.925	Erythroid
ATP5G1	0.384438	7.2469e-235	1.41793e-230	0.989	0.885	Erythroid
MTHFD2	0.253174	7.59638e-235	1.48631e-230	0.825	0.399	Erythroid
CCT6A	0.373605	1.35777e-234	2.65662e-230	0.976	0.801	Erythroid
SMIM12	0.259219	4.82583e-234	9.44221e-230	0.857	0.437	Erythroid
POLR2L	0.38097	2.29932e-233	4.49885e-229	0.979	0.851	Erythroid
STXBP6	0.25804	7.5742e-233	1.48197e-228	0.42	0.087	Erythroid
PSMG1	0.341347	1.51368e-232	2.96167e-228	0.922	0.574	Erythroid
MTCH2	0.333439	1.71788e-231	3.36121e-227	0.904	0.536	Erythroid
METAP2	0.379427	1.18175e-230	2.31221e-226	0.936	0.635	Erythroid
MYC	0.47853	1.41143e-230	2.7616e-226	0.994	0.841	Erythroid
TIMM10	0.279442	2.00882e-230	3.93045e-226	0.765	0.336	Erythroid
EIF3A	0.3906	3.04197e-230	5.95192e-226	0.982	0.807	Erythroid
COX5A	0.312847	1.7838e-229	3.49019e-225	1	0.978	Erythroid
LINC00116	0.281139	3.88575e-228	7.60286e-224	0.864	0.453	Erythroid
PAK1IP1	0.254728	4.31042e-228	8.43377e-224	0.735	0.309	Erythroid
RBX1	0.338317	4.40279e-228	8.6145e-224	0.995	0.928	Erythroid
NT5C	0.296085	9.97916e-228	1.95252e-223	0.907	0.519	Erythroid
RIF1	0.272649	1.67696e-227	3.28114e-223	0.843	0.425	Erythroid
DTYMK	0.316173	9.97594e-226	1.95189e-221	0.806	0.387	Erythroid
PSMB5	0.33925	8.62285e-225	1.68715e-220	0.98	0.833	Erythroid
PFDN6	0.323118	4.43234e-224	8.67232e-220	0.895	0.526	Erythroid
TCEB2	0.329272	1.44194e-223	2.8213e-219	0.997	0.948	Erythroid
HSPA8	0.40891	1.75479e-223	3.43342e-219	0.998	0.981	Erythroid
SLC43A3	0.279441	2.70687e-223	5.29626e-219	0.69	0.27	Erythroid
MRPL2	0.280017	1.26853e-219	2.48202e-215	0.854	0.449	Erythroid
GTF3C6	0.339038	4.56079e-219	8.92364e-215	0.981	0.814	Erythroid
SLC29A1	0.253255	4.56403e-219	8.92998e-215	0.684	0.27	Erythroid
SUPT16H	0.342632	8.50708e-219	1.6645e-214	0.918	0.577	Erythroid
NDUFA8	0.328949	1.02879e-218	2.01294e-214	0.945	0.663	Erythroid
GYPB	0.27599	2.66845e-218	5.22109e-214	0.254	0.016	Erythroid
STOML2	0.327549	3.55915e-218	6.96384e-214	0.984	0.864	Erythroid
NAA38	0.380133	4.20704e-217	8.23149e-213	0.989	0.856	Erythroid
MRPL13	0.330188	3.80733e-215	7.44943e-211	0.917	0.597	Erythroid
SSB	0.346864	7.99038e-214	1.5634e-209	0.986	0.845	Erythroid
SRI	0.347123	2.41336e-212	4.72199e-208	0.978	0.829	Erythroid
MRPL28	0.284402	1.38822e-211	2.71618e-207	0.869	0.481	Erythroid
SLC39A3	0.333987	4.96028e-211	9.70529e-207	0.988	0.852	Erythroid
THOC3	0.286948	2.32398e-210	4.5471e-206	0.85	0.456	Erythroid
MRPS2	0.296737	1.09231e-209	2.13722e-205	0.908	0.55	Erythroid
BID	0.284599	1.36127e-209	2.66347e-205	0.867	0.479	Erythroid
GCSH	0.320369	1.80925e-209	3.53997e-205	0.934	0.619	Erythroid
IFRD2	0.295244	3.06722e-209	6.00132e-205	0.896	0.522	Erythroid
TIMM8B	0.358681	1.05342e-206	2.06111e-202	0.96	0.749	Erythroid
WDR74	0.260459	1.15825e-206	2.26622e-202	0.854	0.461	Erythroid
SSSCA1	0.267496	1.37107e-206	2.68263e-202	0.807	0.405	Erythroid
CCT5	0.345041	4.41216e-205	8.63283e-201	0.962	0.763	Erythroid
EIF1AY	0.348556	2.18079e-204	4.26693e-200	0.951	0.679	Erythroid
SNRPB	0.333914	2.31256e-204	4.52476e-200	0.998	0.961	Erythroid
PSMB6	0.325767	8.68402e-204	1.69912e-199	0.977	0.829	Erythroid
VDAC3	0.334785	1.12558e-203	2.20231e-199	0.965	0.762	Erythroid
MRPL4	0.325053	4.01132e-203	7.84855e-199	0.948	0.669	Erythroid
DNAJC15	0.306902	4.48128e-202	8.76807e-198	0.939	0.639	Erythroid
MRPL3	0.322519	1.95953e-201	3.83402e-197	0.946	0.673	Erythroid
PSMB1	0.303924	1.56626e-200	3.06454e-196	0.987	0.942	Erythroid
PPA2	0.317816	2.49661e-200	4.88486e-196	0.924	0.618	Erythroid
PSMD8	0.321272	9.72834e-200	1.90345e-195	0.975	0.789	Erythroid
H2AFV	0.317253	1.20307e-199	2.35392e-195	0.994	0.921	Erythroid
PSMB2	0.338167	9.53024e-199	1.86469e-194	0.986	0.863	Erythroid
HSD17B10	0.311114	1.83624e-198	3.59278e-194	0.953	0.706	Erythroid
MRPL27	0.315963	6.61229e-198	1.29376e-193	0.924	0.623	Erythroid
SUB1	0.298943	1.56006e-197	3.05241e-193	0.995	0.97	Erythroid
NOP16	0.27404	1.57665e-197	3.08487e-193	0.854	0.472	Erythroid
SLC25A6	0.280855	5.841e-197	1.14285e-192	0.999	0.997	Erythroid
HMGB2	0.425599	1.82072e-195	3.56241e-191	0.994	0.861	Erythroid
SF3B5	0.310134	5.29613e-195	1.03624e-190	0.995	0.927	Erythroid
ZNF706	0.326102	1.56137e-194	3.05497e-190	0.978	0.821	Erythroid
NDUFV2	0.308315	6.38752e-194	1.24978e-189	0.982	0.825	Erythroid
MTX1	0.25239	7.25188e-194	1.4189e-189	0.842	0.459	Erythroid
NDUFS8	0.314379	1.02221e-193	2.00006e-189	0.979	0.812	Erythroid
NDUFS6	0.335426	1.55922e-193	3.05077e-189	0.988	0.883	Erythroid
HBA2	0.645198	1.63171e-193	3.1926e-189	0.437	0.111	Erythroid
EIF4EBP1	0.329034	1.30379e-192	2.551e-188	0.977	0.757	Erythroid
MRPL22	0.299395	7.04781e-192	1.37897e-187	0.93	0.638	Erythroid
PDAP1	0.283236	2.20442e-191	4.31317e-187	0.913	0.574	Erythroid
COX5B	0.285098	3.39959e-191	6.65164e-187	0.999	0.973	Erythroid
METTL5	0.292398	4.97646e-191	9.73695e-187	0.936	0.637	Erythroid
HN1	0.327042	1.39214e-190	2.72386e-186	0.895	0.549	Erythroid
MRPL47	0.263181	7.5168e-190	1.47074e-185	0.891	0.533	Erythroid
ATG3	0.279591	1.60972e-188	3.14958e-184	0.869	0.508	Erythroid
COPS3	0.284045	6.19059e-188	1.21125e-183	0.917	0.591	Erythroid
CCDC34	0.255797	1.22021e-187	2.38746e-183	0.867	0.499	Erythroid
TIMM17A	0.276834	4.24203e-186	8.29995e-182	0.867	0.505	Erythroid
MRPL51	0.314434	4.96681e-186	9.71806e-182	0.988	0.911	Erythroid
SRRM2	0.317328	4.03689e-184	7.89858e-180	0.973	0.777	Erythroid
ATF7IP2	0.263634	1.5241e-183	2.98205e-179	0.699	0.316	Erythroid
PRDX4	0.323773	2.3949e-183	4.68587e-179	0.924	0.648	Erythroid
SERBP1	0.309951	1.01316e-182	1.98235e-178	0.999	0.985	Erythroid
DDX21	0.283445	1.5215e-182	2.97696e-178	0.938	0.627	Erythroid
PPA1	0.304882	1.89441e-182	3.7066e-178	0.992	0.905	Erythroid
BSG	0.338755	1.15441e-181	2.25872e-177	0.972	0.826	Erythroid
RAB11A	0.255357	7.08046e-181	1.38536e-176	0.927	0.6	Erythroid
ECHS1	0.291188	2.60605e-180	5.09899e-176	0.932	0.648	Erythroid
PRMT1	0.30991	2.77969e-179	5.43874e-175	0.98	0.844	Erythroid
MRPL41	0.275309	3.63854e-179	7.11917e-175	0.943	0.647	Erythroid
TKT	0.287739	1.46843e-178	2.87313e-174	0.967	0.707	Erythroid
FAM162A	0.250148	7.16458e-178	1.40182e-173	0.866	0.509	Erythroid
NUDC	0.297179	1.77745e-177	3.47776e-173	0.912	0.6	Erythroid
DRAP1	0.277052	2.49448e-177	4.88069e-173	0.995	0.935	Erythroid
NDUFB8	0.298653	3.2926e-177	6.44229e-173	0.987	0.876	Erythroid
SNRPF	0.278473	1.14569e-176	2.24165e-172	0.998	0.963	Erythroid
MRPL21	0.277906	1.39171e-176	2.72301e-172	0.905	0.587	Erythroid
NDUFA9	0.256298	5.42145e-176	1.06076e-171	0.875	0.526	Erythroid
CDK4	0.303404	2.24831e-175	4.39904e-171	0.988	0.858	Erythroid
OCIAD2	0.274779	3.0143e-175	5.89778e-171	0.955	0.694	Erythroid
CHCHD2	0.265955	7.73015e-175	1.51248e-170	0.999	0.998	Erythroid
CACYBP	0.326587	1.2071e-174	2.36182e-170	0.977	0.812	Erythroid
RUVBL2	0.303422	3.23139e-174	6.32254e-170	0.942	0.694	Erythroid
TCEB1	0.288082	6.31088e-174	1.23479e-169	0.936	0.663	Erythroid
ACTB	0.289191	9.25988e-174	1.81179e-169	1	1	Erythroid
ADSL	0.258296	6.10093e-173	1.19371e-168	0.893	0.557	Erythroid
BIRC5	0.317575	8.69522e-173	1.70131e-168	0.662	0.293	Erythroid
NDUFA4	0.259656	4.66826e-172	9.13392e-168	0.999	0.989	Erythroid
RANBP1	0.313472	2.33662e-171	4.57184e-167	0.993	0.901	Erythroid
CDC20	0.310332	4.6393e-171	9.07725e-167	0.546	0.198	Erythroid
POP7	0.263326	1.27992e-170	2.5043e-166	0.875	0.54	Erythroid
VAPA	0.283935	3.07997e-170	6.02627e-166	0.965	0.747	Erythroid
SNRPD1	0.269558	4.10276e-170	8.02746e-166	0.999	0.972	Erythroid
EXOSC8	0.256952	6.02527e-169	1.1789e-164	0.876	0.537	Erythroid
SMS	0.264994	9.49873e-169	1.85852e-164	0.936	0.65	Erythroid
FKBP4	0.310436	2.69152e-168	5.26623e-164	0.954	0.712	Erythroid
C20orf27	0.283683	4.47386e-166	8.75356e-162	0.921	0.622	Erythroid
PYURF	0.279604	5.9927e-166	1.17253e-161	0.987	0.86	Erythroid
CENPW	0.317842	2.10806e-165	4.12463e-161	0.857	0.529	Erythroid
ATP5A1	0.260492	6.07078e-164	1.18781e-159	0.997	0.972	Erythroid
EBNA1BP2	0.316496	3.2439e-163	6.34702e-159	0.957	0.747	Erythroid
AP2M1	0.270602	6.63774e-163	1.29874e-158	0.982	0.885	Erythroid
NAA10	0.254742	9.9158e-162	1.94013e-157	0.923	0.628	Erythroid
AUP1	0.278236	8.94511e-161	1.7502e-156	0.954	0.72	Erythroid
U2SURP	0.284055	2.12588e-160	4.1595e-156	0.927	0.654	Erythroid
UQCRC1	0.261598	2.75018e-159	5.38099e-155	0.923	0.634	Erythroid
SNU13	0.261589	8.66655e-159	1.6957e-154	0.994	0.943	Erythroid
MT-CYB	0.250451	1.26263e-158	2.47046e-154	0.998	1	Erythroid
LSM3	0.284323	1.54739e-158	3.02762e-154	0.987	0.868	Erythroid
BUD31	0.250487	2.58441e-158	5.05666e-154	0.903	0.594	Erythroid
JTB	0.287952	2.9876e-158	5.84554e-154	0.997	0.943	Erythroid
VPS29	0.263517	3.83078e-158	7.4953e-154	0.923	0.636	Erythroid
NDUFAF3	0.287878	1.40319e-157	2.74549e-153	0.958	0.752	Erythroid
TXN	0.25955	8.72841e-157	1.7078e-152	0.999	0.986	Erythroid
NOL7	0.277003	4.52919e-156	8.86182e-152	0.959	0.743	Erythroid
UBE2L3	0.282115	5.86738e-156	1.14801e-151	0.971	0.808	Erythroid
ATP5I	0.265142	3.8433e-155	7.51979e-151	0.943	0.681	Erythroid
CREG1	0.251624	1.67542e-154	3.27812e-150	0.866	0.539	Erythroid
COX6A1	0.26734	3.78495e-154	7.40563e-150	0.997	0.944	Erythroid
NHP2	0.274402	4.01255e-154	7.85095e-150	0.993	0.918	Erythroid
SSBP1	0.273199	1.31985e-153	2.58242e-149	0.988	0.923	Erythroid
RAD23A	0.283509	1.51738e-153	2.9689e-149	0.981	0.827	Erythroid
EEF1E1	0.252999	4.72572e-153	9.24634e-149	0.892	0.582	Erythroid
MDH2	0.262244	8.3726e-152	1.63818e-147	0.989	0.905	Erythroid
ETFB	0.270134	1.39832e-151	2.73594e-147	0.958	0.747	Erythroid
MIF	0.286613	3.5711e-150	6.98721e-146	0.98	0.845	Erythroid
NDUFS7	0.262527	4.82839e-148	9.44724e-144	0.962	0.766	Erythroid
TSTA3	0.258943	7.58971e-148	1.485e-143	0.87	0.556	Erythroid
TUBB4B	0.366401	9.21848e-147	1.80369e-142	0.873	0.576	Erythroid
NCL	0.340204	9.90873e-146	1.93874e-141	0.996	0.963	Erythroid
CALM1	0.25118	1.26997e-145	2.48483e-141	0.949	0.691	Erythroid
DNAJC19	0.250289	1.37645e-144	2.69315e-140	0.932	0.681	Erythroid
CALM3	0.271077	2.21852e-143	4.34076e-139	0.968	0.782	Erythroid
TMEM261	0.253331	2.08757e-141	4.08454e-137	0.958	0.741	Erythroid
NDUFB6	0.26259	4.82807e-141	9.4466e-137	0.973	0.811	Erythroid
GTF2A2	0.255019	5.49968e-140	1.07607e-135	0.971	0.794	Erythroid
MRPL20	0.289868	5.92736e-140	1.15975e-135	0.987	0.896	Erythroid
PNN	0.282586	1.16834e-139	2.28598e-135	0.984	0.887	Erythroid
USMG5	0.261087	1.18237e-139	2.31343e-135	0.988	0.898	Erythroid
PAFAH1B3	0.251492	1.80826e-139	3.53804e-135	0.915	0.655	Erythroid
SNRPD3	0.255126	1.40061e-138	2.74044e-134	0.971	0.79	Erythroid
CCT2	0.255045	1.75429e-138	3.43244e-134	0.989	0.871	Erythroid
TSPO	0.25257	2.11993e-137	4.14786e-133	0.994	0.927	Erythroid
TUBB	0.359345	9.40374e-136	1.83994e-131	0.997	0.951	Erythroid
ENY2	0.258478	1.50371e-134	2.94216e-130	0.972	0.829	Erythroid
PSMA5	0.263348	1.76868e-134	3.4606e-130	0.975	0.825	Erythroid
TOMM22	0.25068	2.45815e-134	4.80961e-130	0.978	0.837	Erythroid
CALM2	0.259567	4.55362e-134	8.90961e-130	0.998	0.97	Erythroid
NDUFC1	0.260175	8.84242e-132	1.73011e-127	0.953	0.76	Erythroid
RBM8A	0.266872	4.20349e-126	8.22456e-122	0.98	0.876	Erythroid
CKS2	0.316717	4.20493e-124	8.22736e-120	0.951	0.743	Erythroid
PTTG1	0.262283	6.30097e-124	1.23285e-119	0.864	0.575	Erythroid
HNRNPA2B1	0.253832	4.13806e-120	8.09652e-116	0.994	0.974	Erythroid
CH17-373J23.1	0.284412	1.63724e-119	3.20343e-115	0.66	0.349	Erythroid
PARK7	0.255729	1.90876e-116	3.73468e-112	0.986	0.884	Erythroid
HIST1H4C	0.439342	3.7103e-109	7.25957e-105	0.976	0.882	Erythroid
H2AFZ	0.267635	1.69057e-108	3.30777e-104	0.998	0.968	Erythroid
CKS1B	0.280615	8.72884e-105	1.70788e-100	0.945	0.75	Erythroid
DUT	0.252347	2.62316e-95	5.13247e-91	0.994	0.939	Erythroid
CLC	4.22611	0	0	0.921	0.08	Basophils
LMO4	1.78268	0	0	0.963	0.312	Basophils
SRGN	1.88347	0	3.33718e-307	1	0.915	Basophils
MS4A3	1.79861	8.84829e-274	1.73126e-269	0.979	0.25	Basophils
AC004791.2	1.58797	2.65555e-237	5.19584e-233	0.948	0.168	Basophils
MS4A2	1.81172	4.76271e-226	9.31873e-222	0.832	0.047	Basophils
EXD3	1.17019	4.79296e-202	9.3779e-198	0.749	0.177	Basophils
CSF2RB	0.829495	4.97682e-175	9.73765e-171	0.749	0.129	Basophils
RPS28	0.442027	1.16333e-160	2.27618e-156	1	1	Basophils
CD63	0.873155	4.50204e-147	8.8087e-143	0.984	0.89	Basophils
HDC	0.858815	2.72761e-137	5.33684e-133	0.545	0.013	Basophils
GATA2	1.00468	1.04112e-134	2.03705e-130	0.901	0.497	Basophils
ALOX5AP	0.870884	6.94064e-113	1.35801e-108	0.628	0.038	Basophils
CAMLG	0.751503	1.56782e-110	3.0676e-106	0.963	0.755	Basophils
TPSAB1	1.47357	7.62986e-94	1.49286e-89	0.414	0.056	Basophils
ANGPT2	0.563693	7.71989e-89	1.51047e-84	0.408	0.026	Basophils
FCER1A	1.39275	5.86119e-86	1.1468e-81	0.89	0.27	Basophils
RNASE2	1.17186	1.21635e-84	2.37991e-80	0.853	0.321	Basophils
BACE2	0.440286	1.34852e-84	2.63852e-80	0.408	0.044	Basophils
CXCR4	0.773667	9.65601e-74	1.8893e-69	0.791	0.464	Basophils
HPGD	0.689655	1.00252e-70	1.96153e-66	0.304	0.039	Basophils
RPS11	0.258162	7.9693e-69	1.55927e-64	1	1	Basophils
TPSB2	0.825034	1.77209e-64	3.46727e-60	0.304	0.034	Basophils
PRG2	0.443228	4.36152e-64	8.53375e-60	0.262	0.005	Basophils
SSR4	0.533963	6.30123e-60	1.2329e-55	0.995	0.969	Basophils
SLC45A3	0.50789	1.66272e-57	3.25328e-53	0.529	0.145	Basophils
BTG1	0.546055	2.5909e-54	5.06936e-50	0.665	0.354	Basophils
FKBP11	0.473809	1.18712e-53	2.32272e-49	0.623	0.428	Basophils
ITM2A	0.574419	2.98919e-53	5.84864e-49	0.921	0.816	Basophils
SEC61G	0.508518	5.78292e-53	1.13149e-48	0.953	0.892	Basophils
ERN1	0.361154	8.42183e-53	1.64782e-48	0.387	0.109	Basophils
PPIB	0.561807	9.94191e-52	1.94523e-47	0.984	0.917	Basophils
TIMP1	0.565928	3.97874e-51	7.78479e-47	0.717	0.511	Basophils
S100A6	0.844478	1.11278e-50	2.17727e-46	1	0.93	Basophils
ORAI3	0.443519	3.39695e-48	6.64647e-44	0.623	0.343	Basophils
ANXA1	0.634728	4.13322e-48	8.08706e-44	0.958	0.87	Basophils
RPL41	0.254706	8.84822e-48	1.73124e-43	1	1	Basophils
FKBP2	0.522042	1.41811e-47	2.77467e-43	0.848	0.689	Basophils
SEC61B	0.477424	5.79658e-46	1.13416e-41	0.99	0.959	Basophils
DTWD2	0.297449	1.68047e-45	3.288e-41	0.283	0.05	Basophils
SERP1	0.413627	1.00138e-44	1.95929e-40	0.974	0.966	Basophils
TMEM258	0.434211	1.59288e-44	3.11663e-40	0.974	0.944	Basophils
P4HB	0.45954	2.08769e-43	4.08478e-39	0.921	0.784	Basophils
SSR2	0.435574	7.24921e-43	1.41838e-38	0.974	0.955	Basophils
CITED2	0.409552	5.24906e-41	1.02703e-36	0.503	0.188	Basophils
SND1	0.357994	4.31793e-39	8.44846e-35	0.628	0.466	Basophils
TTC27	0.317656	4.63418e-38	9.06724e-34	0.408	0.158	Basophils
FTL	0.295895	4.91675e-38	9.62012e-34	1	1	Basophils
SSR3	0.379185	1.46265e-37	2.86183e-33	0.822	0.73	Basophils
RUNX1	0.336852	2.59214e-35	5.07179e-31	0.565	0.429	Basophils
RPL36AL	0.372195	3.58512e-35	7.01465e-31	1	0.997	Basophils
VIM	0.5487	4.71411e-35	9.22362e-31	0.979	0.903	Basophils
RP6-159A1.4	0.405281	7.98705e-35	1.56275e-30	0.639	0.487	Basophils
CD84	0.400585	1.35549e-34	2.65214e-30	0.618	0.343	Basophils
CNRIP1	0.578124	1.35282e-33	2.64692e-29	0.696	0.273	Basophils
KIAA0101	0.712776	4.18449e-33	8.18737e-29	0.853	0.727	Basophils
EPX	0.471982	4.91042e-33	9.60773e-29	0.152	0.004	Basophils
KCNH2	0.364588	3.05721e-32	5.98173e-28	0.613	0.209	Basophils
HYAL3	0.301542	4.06322e-32	7.9501e-28	0.461	0.251	Basophils
HPGDS	0.392313	3.3104e-31	6.47712e-27	0.586	0.32	Basophils
GLUL	0.312398	2.16186e-30	4.22989e-26	0.749	0.775	Basophils
MYDGF	0.377683	9.75385e-29	1.90844e-24	0.89	0.804	Basophils
CLU	0.437124	1.7412e-28	3.40682e-24	0.707	0.572	Basophils
AIG1	0.256398	4.66419e-28	9.12595e-24	0.497	0.386	Basophils
PDZD8	0.332366	2.52615e-27	4.94266e-23	0.571	0.39	Basophils
C12orf57	0.350253	3.97393e-26	7.77539e-22	1	0.977	Basophils
EMP3	0.469211	9.7878e-26	1.91508e-21	0.822	0.49	Basophils
RP11-620J15.3	0.345579	1.34743e-25	2.63639e-21	0.99	0.985	Basophils
RNF168	0.353771	1.81386e-25	3.54901e-21	0.56	0.344	Basophils
FOSB	0.289008	7.42085e-25	1.45196e-20	0.351	0.108	Basophils
FBXO7	0.416131	7.74282e-25	1.51496e-20	0.853	0.641	Basophils
FAM46A	0.389402	1.08869e-24	2.13014e-20	0.576	0.386	Basophils
SAT1	0.379554	3.44417e-24	6.73886e-20	0.654	0.505	Basophils
S100A11	0.346849	1.19773e-23	2.34348e-19	0.749	0.614	Basophils
C1orf186	0.430518	1.65246e-23	3.2332e-19	0.66	0.38	Basophils
CANX	0.303422	2.86879e-23	5.61308e-19	0.759	0.637	Basophils
NFE2	0.284638	6.81521e-23	1.33346e-18	0.832	0.833	Basophils
ASRGL1	0.26273	1.39435e-22	2.72818e-18	0.586	0.442	Basophils
NDUFB9	0.343137	2.8191e-22	5.51585e-18	0.974	0.949	Basophils
SEC11A	0.327578	2.896e-22	5.66632e-18	0.895	0.818	Basophils
MLEC	0.295799	1.7994e-21	3.52071e-17	0.796	0.715	Basophils
GATA1	0.341612	4.36926e-21	8.5489e-17	0.66	0.314	Basophils
FAM83A	0.31414	1.15895e-20	2.26759e-16	0.513	0.261	Basophils
PFDN5	0.267262	1.73816e-19	3.40088e-15	0.99	0.995	Basophils
NCOA4	0.253872	2.15955e-19	4.22538e-15	0.586	0.46	Basophils
RNF130	0.308402	1.22679e-18	2.40034e-14	0.906	0.827	Basophils
RABAC1	0.300509	2.32265e-18	4.5445e-14	0.796	0.72	Basophils
TRAF3IP3	0.261272	1.25555e-16	2.45661e-12	0.482	0.336	Basophils
CPVL	0.250496	7.31812e-16	1.43186e-11	0.482	0.29	Basophils
CEBPE	0.365942	1.69869e-15	3.32365e-11	0.236	0.081	Basophils
SLC40A1	0.261653	3.25152e-15	6.36192e-11	0.56	0.427	Basophils
DUSP23	0.252957	8.5876e-15	1.68025e-10	0.801	0.789	Basophils
EREG	0.29545	1.57082e-13	3.07347e-09	0.429	0.266	Basophils
PLP2	0.269117	1.83251e-12	3.58548e-08	0.665	0.572	Basophils
PLEK	0.261476	4.3256e-12	8.46348e-08	0.749	0.559	Basophils
FOS	0.353421	4.73473e-12	9.26397e-08	0.681	0.464	Basophils
MTDH	0.272839	8.27381e-12	1.61885e-07	0.979	0.961	Basophils
SOX4	0.267653	9.37901e-12	1.8351e-07	0.801	0.794	Basophils
IFITM2	0.263835	9.61884e-12	1.88202e-07	0.953	0.939	Basophils
S100A4	0.395297	1.19319e-11	2.3346e-07	0.869	0.886	Basophils
MRPL16	0.259837	1.26539e-11	2.47586e-07	0.843	0.83	Basophils
LINC00152	0.256257	3.64771e-11	7.1371e-07	0.717	0.587	Basophils
KLF6	0.401194	1.12106e-10	2.19347e-06	0.576	0.317	not assigned
[truncated: 1 more rows]

## Sheet: MDS2
Gene	avg_logFC	p_value	p_value_adjusted	pct_expression_CellType	pct_expression_Rest	CellType
CRHBP	1.09916	6.5119e-220	1.23856e-215	0.587	0.031	HSC
CD52	1.25793	3.37688e-217	6.42282e-213	0.912	0.376	HSC
CD164	0.829627	6.81516e-178	1.29624e-173	0.812	0.611	HSC
HOPX	1.12409	5.25554e-173	9.99603e-169	0.894	0.333	HSC
FAM30A	0.818829	7.97733e-140	1.51729e-135	0.798	0.556	HSC
EIF4A2	0.729557	2.16606e-135	4.11984e-131	0.862	0.721	HSC
MLLT3	0.597855	4.03868e-133	7.68156e-129	0.548	0.33	HSC
RPL31	0.352925	1.18444e-127	2.25281e-123	1	0.999	HSC
ZFAS1	0.700747	3.34569e-127	6.36351e-123	0.994	0.987	HSC
MDK	0.933525	9.04057e-126	1.71952e-121	0.71	0.244	HSC
CD37	0.718739	2.86297e-123	5.44538e-119	0.956	0.856	HSC
AC011139.1	0.856194	9.64856e-113	1.83516e-108	0.311	0.011	HSC
RPL35A	0.273558	1.61015e-112	3.0625e-108	1	1	HSC
HLA-E	0.730964	1.07594e-110	2.04643e-106	0.935	0.782	HSC
EGFL7	0.692341	1.99813e-104	3.80045e-100	0.871	0.684	HSC
MEG3	0.703031	1.20013e-102	2.28265e-98	0.37	0.058	HSC
CIRBP	0.568144	3.40066e-99	6.46805e-95	0.824	0.772	HSC
TPT1	0.300862	3.39619e-97	6.45956e-93	1	1	HSC
BST2	0.669434	3.80557e-92	7.23819e-88	0.903	0.798	HSC
SYPL1	0.520995	1.1747e-90	2.23427e-86	0.716	0.616	HSC
SELL	0.783852	1.34455e-88	2.55734e-84	0.771	0.403	HSC
RACK1	0.287559	4.37198e-86	8.31551e-82	1	1	HSC
TAOK3	0.569097	1.61094e-85	3.06401e-81	0.669	0.531	HSC
MYCT1	0.44394	3.5833e-85	6.81544e-81	0.284	0.104	HSC
EIF3E	0.464001	4.39811e-85	8.36521e-81	1	0.985	HSC
PRDX1	0.571213	4.69314e-83	8.92636e-79	0.933	0.862	HSC
SPINK2	0.714684	7.33112e-81	1.39438e-76	0.944	0.526	HSC
FXYD5	0.535818	3.00771e-77	5.72067e-73	0.988	0.959	HSC
HEMGN	0.589678	1.21927e-76	2.31905e-72	0.361	0.058	HSC
ICAM3	0.55035	2.90711e-76	5.52932e-72	0.836	0.701	HSC
REC8	0.359163	1.96755e-74	3.74229e-70	0.416	0.374	HSC
EPB41L4A-AS1	0.469318	4.86402e-73	9.25137e-69	0.783	0.722	HSC
HSD17B11	0.50705	4.37631e-70	8.32374e-66	0.801	0.754	HSC
ARHGDIB	0.477611	1.63097e-69	3.1021e-65	0.985	0.977	HSC
SOCS2	0.344096	6.30904e-69	1.19998e-64	0.314	0.2	HSC
BEX2	0.451671	1.05532e-68	2.00722e-64	0.507	0.319	HSC
CD74	0.606081	3.13543e-68	5.96358e-64	0.997	0.974	HSC
RIC3	0.37898	1.69952e-65	3.23249e-61	0.27	0.103	HSC
HIST3H2A	0.476353	7.50012e-65	1.42652e-60	0.469	0.317	HSC
ACAP1	0.433201	1.15538e-64	2.19754e-60	0.601	0.525	HSC
AC026369.3	0.328519	1.3656e-63	2.59737e-59	0.188	0.015	HSC
DDAH2	0.51148	3.11108e-63	5.91727e-59	0.639	0.438	HSC
AIF1	0.550798	7.15123e-63	1.36016e-58	0.994	0.905	HSC
LAPTM5	0.415999	2.16368e-62	4.11532e-58	0.771	0.753	HSC
BNIP3L	0.289141	3.74263e-61	7.11847e-57	0.422	0.437	HSC
ARL6IP5	0.370507	7.26491e-61	1.38179e-56	0.692	0.694	HSC
FGFR1OP2	0.253106	8.13998e-61	1.54822e-56	0.349	0.362	HSC
HLA-DPB1	0.580617	8.73031e-60	1.6605e-55	0.959	0.859	HSC
MAGED2	0.313482	1.68411e-59	3.20319e-55	0.44	0.412	HSC
SSBP2	0.381749	6.55513e-59	1.24679e-54	0.413	0.329	HSC
TMEM98	0.317169	8.32707e-59	1.58381e-54	0.293	0.216	HSC
BIN1	0.338523	1.86241e-58	3.54231e-54	0.293	0.183	HSC
PCDH9	0.407029	4.55989e-58	8.67291e-54	0.22	0.043	HSC
ZBTB20	0.38781	5.84967e-58	1.11261e-53	0.32	0.21	HSC
C6orf48	0.439356	7.72358e-58	1.46902e-53	0.968	0.961	HSC
HLA-DPA1	0.546899	2.99058e-57	5.68809e-53	0.935	0.832	HSC
SYF2	0.390849	7.31403e-57	1.39113e-52	0.754	0.728	HSC
AJ009632.2	0.257618	6.3746e-56	1.21245e-51	0.141	0.004	HSC
GIMAP2	0.364054	1.12008e-55	2.13039e-51	0.343	0.206	HSC
EEF2	0.353261	2.62916e-55	5.00066e-51	0.994	0.988	HSC
LAPTM4A	0.31742	7.95778e-55	1.51357e-50	0.61	0.626	HSC
IFI44L	0.462762	1.27547e-54	2.42595e-50	0.487	0.376	HSC
PTPRC	0.369427	7.29785e-54	1.38805e-49	0.408	0.301	HSC
LTA4H	0.278046	7.46036e-54	1.41896e-49	0.499	0.53	HSC
AKR1C3	0.379437	1.89853e-53	3.611e-49	0.619	0.551	HSC
BEX4	0.290652	4.6723e-53	8.88672e-49	0.557	0.572	HSC
LETMD1	0.309454	8.13131e-53	1.54657e-48	0.46	0.449	HSC
SEPT6	0.424413	1.19215e-52	2.26747e-48	0.792	0.741	HSC
KDELR1	0.307849	1.19645e-52	2.27564e-48	0.584	0.605	HSC
IGBP1	0.316564	1.62408e-52	3.089e-48	0.63	0.627	HSC
RAMP1	0.316815	3.69981e-52	7.03703e-48	0.428	0.372	HSC
PNRC2	0.276495	4.65342e-51	8.8508e-47	0.522	0.537	HSC
IL18	0.309897	8.4328e-51	1.60392e-46	0.446	0.423	HSC
CASP4	0.335533	1.01939e-50	1.93889e-46	0.534	0.506	HSC
LST1	0.471761	1.33409e-50	2.53744e-46	0.419	0.284	HSC
HLA-DRA	0.490186	3.86421e-50	7.34972e-46	0.985	0.958	HSC
ANGPT1	0.355639	4.76541e-50	9.0638e-46	0.276	0.1	HSC
PNISR	0.347864	1.89969e-49	3.61321e-45	0.78	0.804	HSC
BIN2	0.343608	2.2225e-49	4.2272e-45	0.443	0.365	HSC
SRSF5	0.353197	2.60756e-49	4.95957e-45	0.894	0.927	HSC
ARHGAP15	0.288745	3.41517e-49	6.49565e-45	0.51	0.488	HSC
TCEAL8	0.263508	3.96825e-49	7.54761e-45	0.501	0.522	HSC
CHST12	0.326629	8.56274e-48	1.62863e-43	0.607	0.581	HSC
SAT2	0.333819	7.09462e-47	1.3494e-42	0.358	0.249	HSC
MSI2	0.32389	1.40466e-46	2.67166e-42	0.443	0.388	HSC
CD34	0.368215	1.46231e-46	2.78132e-42	0.496	0.388	HSC
SERPINB6	0.277235	3.38861e-46	6.44514e-42	0.598	0.609	HSC
LIMS1	0.310073	3.98989e-46	7.58878e-42	0.501	0.489	HSC
DNAJC4	0.252858	7.27671e-46	1.38403e-41	0.393	0.387	HSC
DPPA4	0.252101	1.08901e-45	2.0713e-41	0.273	0.226	HSC
KRT18	0.435873	5.19451e-45	9.87996e-41	0.419	0.231	HSC
MAX	0.314607	8.12406e-45	1.5452e-40	0.44	0.393	HSC
FAM117A	0.332233	2.37715e-44	4.52135e-40	0.346	0.271	HSC
TAF7	0.283308	4.93231e-43	9.38124e-39	0.584	0.602	HSC
ELMO1	0.275512	7.39187e-43	1.40593e-38	0.32	0.236	HSC
H1F0	0.444452	1.12709e-41	2.14373e-37	0.504	0.412	HSC
PBXIP1	0.296712	1.41334e-41	2.68817e-37	0.267	0.141	HSC
N4BP2L2	0.28279	2.00601e-41	3.81544e-37	0.674	0.684	HSC
RARRES3	0.320431	3.31035e-41	6.29628e-37	0.34	0.259	HSC
PABPC1	0.320634	3.64307e-41	6.92913e-37	0.988	0.989	HSC
RGS10	0.313756	4.00339e-41	7.61444e-37	0.557	0.521	HSC
STMN3	0.266986	4.01427e-41	7.63514e-37	0.264	0.171	HSC
CLDN15	0.29548	1.03041e-40	1.95985e-36	0.246	0.117	HSC
NPR3	0.300988	1.63686e-40	3.11332e-36	0.246	0.103	HSC
EIF2S3	0.251589	5.87205e-40	1.11686e-35	0.575	0.599	HSC
TXNIP	0.295434	8.60904e-40	1.63744e-35	0.578	0.597	HSC
TMEM173	0.302627	4.92708e-39	9.37131e-35	0.639	0.642	HSC
ERG	0.263638	5.78183e-39	1.0997e-34	0.24	0.159	HSC
CLEC2B	0.344909	3.08067e-38	5.85943e-34	0.46	0.349	HSC
GPSM3	0.258643	3.75381e-38	7.13974e-34	0.545	0.568	HSC
RAB37	0.25434	2.62869e-37	4.99977e-33	0.378	0.366	HSC
GUCY1A1	0.26917	6.64559e-37	1.26399e-32	0.229	0.123	HSC
SNHG8	0.318623	3.93467e-36	7.48375e-32	0.947	0.959	HSC
CELF2	0.322297	8.63254e-35	1.64191e-30	0.516	0.417	HSC
HLA-DRB1	0.402297	3.51379e-34	6.68323e-30	0.941	0.906	HSC
GMFG	0.348532	4.03119e-34	7.66733e-30	0.971	0.962	HSC
SELENOP	0.393136	1.60337e-33	3.04961e-29	0.475	0.34	HSC
IGHM	0.490126	2.07048e-33	3.93805e-29	0.302	0.096	HSC
UCHL1	0.288056	3.85126e-33	7.32509e-29	0.323	0.254	HSC
CRYGD	0.304655	4.36713e-33	8.30628e-29	0.566	0.519	HSC
RSL1D1	0.264032	2.85133e-31	5.42323e-27	0.856	0.878	HSC
IFI16	0.365802	1.21162e-29	2.3045e-25	0.589	0.449	HSC
IL1B	0.389038	2.11834e-29	4.02908e-25	0.666	0.523	HSC
EVI2B	0.367328	4.90468e-28	9.32869e-24	0.443	0.29	HSC
MALAT1	0.449257	7.97521e-28	1.51688e-23	0.994	0.999	HSC
HIST2H2BE	0.25534	9.61735e-28	1.82922e-23	0.152	0.056	HSC
HLA-DMA	0.274048	3.11753e-27	5.92954e-23	0.733	0.754	HSC
EIF3L	0.265376	4.59061e-27	8.73133e-23	0.974	0.97	HSC
EIF3D	0.262269	5.60666e-27	1.06639e-22	0.865	0.859	HSC
COMMD6	0.260407	1.84054e-26	3.5007e-22	0.982	0.989	HSC
HLA-A	0.301982	2.85286e-24	5.42615e-20	0.965	0.956	HSC
KCNQ1OT1	0.275946	7.03984e-24	1.33898e-19	0.343	0.3	HSC
VAMP5	0.372375	1.43286e-20	2.72529e-16	0.589	0.398	HSC
CSF3R	0.297553	7.20636e-15	1.37065e-10	0.563	0.412	HSC
HBA1	0.301303	4.16574e-14	7.92324e-10	0.073	0.215	HSC
HBA2	0.556262	4.20436e-08	0.000799669	0.094	0.17	HSC
SPINK2	1.20939	0	0	0.986	0.369	LMPP
SMIM24	0.924488	0	0	0.951	0.385	LMPP
HOPX	0.80835	0	0	0.784	0.186	LMPP
CSF3R	0.756483	0	0	0.819	0.262	LMPP
IGLL1	0.744282	0	0	0.819	0.491	LMPP
CD52	0.714824	0	0	0.729	0.265	LMPP
SELL	0.609258	0	0	0.762	0.283	LMPP
HLA-DPA1	0.579576	0	0	0.971	0.783	LMPP
HLA-DPB1	0.57079	0	0	0.987	0.814	LMPP
CD74	0.551214	0	0	1	0.966	LMPP
PKM	0.535221	0	0	0.844	0.46	LMPP
HLA-DRA	0.529304	0	0	0.999	0.943	LMPP
SERPINB1	0.524165	0	0	0.999	0.916	LMPP
ITM2C	0.520609	0	0	0.864	0.552	LMPP
MGST1	0.515603	0	0	0.983	0.883	LMPP
NAP1L1	0.512948	0	0	1	0.978	LMPP
PRAM1	0.502579	0	0	0.652	0.219	LMPP
ENO1	0.455874	0	0	0.997	0.962	LMPP
GAPDH	0.425743	0	0	1	0.998	LMPP
B2M	0.363348	0	0	1	1	LMPP
TNFSF13B	0.45182	0	0	0.86	0.46	LMPP
AIF1	0.443169	0	0	0.993	0.875	LMPP
HLA-A	0.448223	0	0	0.99	0.943	LMPP
ICAM3	0.479804	0	0	0.851	0.649	LMPP
EGFL7	0.487036	5.82475e-294	1.10787e-289	0.864	0.625	LMPP
HLA-DRB1	0.434956	7.05623e-282	1.34209e-277	0.98	0.88	LMPP
MDK	0.514995	2.92317e-280	5.55987e-276	0.522	0.16	LMPP
TRH	0.484025	5.65936e-276	1.07641e-271	0.588	0.209	LMPP
HLA-B	0.341834	7.48109e-271	1.4229e-266	1	0.993	LMPP
GLIPR1	0.454803	1.47061e-256	2.7971e-252	0.586	0.22	LMPP
LSP1	0.397122	2.66988e-255	5.07811e-251	0.797	0.432	LMPP
SELENOP	0.460303	3.15681e-252	6.00426e-248	0.588	0.251	LMPP
ARHGDIB	0.346323	4.1504e-251	7.89406e-247	0.997	0.97	LMPP
LAT2	0.442177	2.92357e-250	5.56062e-246	0.682	0.318	LMPP
HLA-C	0.361997	6.25088e-244	1.18892e-239	0.989	0.952	LMPP
SH3BGRL3	0.373737	1.69013e-241	3.21463e-237	0.985	0.923	LMPP
CORO1A	0.384257	2.23051e-230	4.24244e-226	0.873	0.578	LMPP
PSMB9	0.37823	1.91432e-210	3.64104e-206	0.791	0.474	LMPP
SPNS3	0.317395	3.0579e-204	5.81612e-200	0.572	0.243	LMPP
IFITM3	0.413157	1.19213e-189	2.26744e-185	0.727	0.438	LMPP
PSMB8	0.34064	5.59714e-179	1.06458e-174	0.89	0.74	LMPP
BST2	0.337837	8.98932e-178	1.70977e-173	0.917	0.757	LMPP
ZFAS1	0.292585	1.59289e-177	3.02968e-173	0.997	0.984	LMPP
IFI16	0.376179	3.38012e-177	6.42899e-173	0.661	0.375	LMPP
PHGDH	0.347969	1.89002e-173	3.59483e-169	0.552	0.261	LMPP
GMFG	0.290294	1.62526e-171	3.09125e-167	0.991	0.952	LMPP
CLDN10	0.347406	2.30147e-170	4.3774e-166	0.598	0.326	LMPP
ANKRD28	0.377307	1.39661e-169	2.65634e-165	0.647	0.442	LMPP
VAMP5	0.294638	1.98686e-169	3.779e-165	0.628	0.318	LMPP
GSTP1	0.296247	2.87508e-165	5.4684e-161	0.981	0.933	LMPP
HLA-E	0.33943	1.29874e-160	2.4702e-156	0.895	0.746	LMPP
RGL4	0.264295	1.90931e-155	3.6315e-151	0.331	0.097	LMPP
ARPC2	0.264218	8.11848e-153	1.54414e-148	0.978	0.926	LMPP
SMIM3	0.293209	8.91588e-152	1.6958e-147	0.473	0.202	LMPP
UCHL1	0.312399	2.18045e-149	4.14722e-145	0.431	0.19	LMPP
EVI2B	0.296687	3.58496e-149	6.8186e-145	0.495	0.219	LMPP
CRYGD	0.332567	1.14563e-147	2.17899e-143	0.675	0.461	LMPP
FAM30A	0.34334	1.07068e-146	2.03643e-142	0.627	0.541	LMPP
KRT18	0.32963	2.15851e-146	4.10548e-142	0.406	0.173	LMPP
CD44	0.313097	1.5421e-136	2.93307e-132	0.76	0.629	LMPP
SPARC	0.298384	4.81922e-136	9.16615e-132	0.459	0.224	LMPP
MAP1A	0.263681	1.26136e-135	2.39911e-131	0.329	0.115	LMPP
ACAP1	0.295825	1.27129e-134	2.41799e-130	0.636	0.485	LMPP
ADA	0.299287	6.23618e-132	1.18612e-127	0.465	0.224	LMPP
CASP4	0.283398	2.08733e-131	3.9701e-127	0.612	0.467	LMPP
TMIGD2	0.291113	1.34696e-128	2.56191e-124	0.506	0.26	LMPP
ARRB2	0.282668	9.36947e-126	1.78207e-121	0.529	0.334	LMPP
SSBP2	0.254847	2.77877e-125	5.28522e-121	0.428	0.294	LMPP
CD99	0.28121	2.93326e-125	5.57905e-121	0.721	0.606	LMPP
CDCA7	0.264334	7.53628e-125	1.4334e-120	0.563	0.427	LMPP
ARMH1	0.289376	2.54107e-121	4.83311e-117	0.455	0.221	LMPP
IFI6	0.339504	3.45822e-120	6.57753e-116	0.789	0.607	LMPP
TMEM173	0.282051	4.45494e-120	8.47329e-116	0.747	0.601	LMPP
MIR181A1HG	0.255027	3.83956e-119	7.30284e-115	0.324	0.134	LMPP
CHST12	0.263937	1.10324e-118	2.09837e-114	0.659	0.552	LMPP
TAOK3	0.286878	1.76253e-117	3.35234e-113	0.637	0.497	LMPP
C9orf43	0.251882	2.54828e-115	4.84682e-111	0.36	0.145	LMPP
ANXA1	0.275654	1.05414e-110	2.00498e-106	0.588	0.337	LMPP
LITAF	0.286319	1.31767e-110	2.5062e-106	0.594	0.397	LMPP
CD34	0.271911	1.59313e-110	3.03013e-106	0.524	0.341	LMPP
TKT	0.25478	1.96927e-110	3.74556e-106	0.962	0.906	LMPP
SEPT6	0.283671	8.32892e-110	1.58416e-105	0.816	0.714	LMPP
HSD17B11	0.271876	6.77192e-106	1.28802e-101	0.828	0.728	LMPP
EAF2	0.263878	1.9122e-102	3.637e-98	0.631	0.451	LMPP
NEAT1	0.295393	9.0328e-102	1.71804e-97	0.674	0.535	LMPP
CD37	0.254029	4.20679e-99	8.00132e-95	0.912	0.839	LMPP
CLEC2B	0.25127	3.76297e-95	7.15716e-91	0.504	0.294	LMPP
CAT	0.258934	6.68708e-90	1.27188e-85	0.956	0.872	LMPP
DDAH2	0.256838	7.85888e-87	1.49476e-82	0.573	0.395	LMPP
MX1	0.26612	2.02511e-84	3.85175e-80	0.433	0.244	LMPP
KCNQ1OT1	0.269729	5.25694e-81	9.99871e-77	0.419	0.256	LMPP
BEX1	0.300752	5.40248e-74	1.02755e-69	0.569	0.423	LMPP
PTTG1	1.38596	7.47254e-250	1.42128e-245	1	0.562	Cycling_LMPP
ARL6IP1	1.25354	3.64345e-242	6.92985e-238	0.945	0.527	Cycling_LMPP
CENPF	1.34762	1.25857e-210	2.3938e-206	0.958	0.398	Cycling_LMPP
CCNB2	1.04306	1.1144e-164	2.11958e-160	0.864	0.333	Cycling_LMPP
HMGB2	1.21072	8.76814e-163	1.6677e-158	0.996	0.918	Cycling_LMPP
CKS2	1.08011	1.30988e-161	2.49139e-157	0.928	0.713	Cycling_LMPP
CDKN3	1.0602	7.00973e-160	1.33325e-155	0.852	0.323	Cycling_LMPP
HMMR	1.03299	2.24806e-150	4.27581e-146	0.831	0.189	Cycling_LMPP
CCNB1	1.12169	3.24316e-146	6.16848e-142	0.864	0.297	Cycling_LMPP
CDC20	1.14395	1.26875e-142	2.41317e-138	0.869	0.257	Cycling_LMPP
TUBB4B	1.14482	1.22798e-141	2.33563e-137	0.869	0.536	Cycling_LMPP
NUSAP1	1.01643	4.72677e-137	8.99032e-133	0.809	0.373	Cycling_LMPP
TOP2A	1.14667	1.59535e-136	3.03436e-132	0.805	0.301	Cycling_LMPP
UBE2C	1.57681	5.33469e-135	1.01466e-130	0.792	0.385	Cycling_LMPP
HMGN2	0.856279	2.20041e-132	4.18518e-128	1	0.955	Cycling_LMPP
BIRC5	0.976675	1.4866e-130	2.82752e-126	0.903	0.346	Cycling_LMPP
TPX2	0.793631	2.40127e-119	4.56721e-115	0.72	0.265	Cycling_LMPP
KPNA2	0.941492	4.96896e-116	9.45096e-112	0.754	0.356	Cycling_LMPP
PLK1	0.924226	2.39138e-115	4.5484e-111	0.746	0.156	Cycling_LMPP
TROAP	0.662066	3.00384e-106	5.71331e-102	0.657	0.135	Cycling_LMPP
IGLL1	1.13109	5.37857e-103	1.023e-98	0.941	0.574	Cycling_LMPP
ASPM	0.727365	1.7031e-101	3.23929e-97	0.623	0.159	Cycling_LMPP
CENPE	0.699666	3.1471e-97	5.98579e-93	0.644	0.157	Cycling_LMPP
NUCKS1	0.719426	6.77925e-97	1.28941e-92	0.987	0.781	Cycling_LMPP
HMGB3	0.691766	5.66986e-96	1.07841e-91	0.839	0.426	Cycling_LMPP
PIMREG	0.488288	1.0784e-95	2.05112e-91	0.483	0.034	Cycling_LMPP
TUBA1B	0.824504	2.16569e-86	4.11914e-82	1	0.967	Cycling_LMPP
BUB3	0.657471	2.58824e-85	4.92283e-81	0.881	0.601	Cycling_LMPP
AURKB	0.820617	4.37855e-83	8.328e-79	0.758	0.278	Cycling_LMPP
UBB	0.607738	8.60709e-83	1.63707e-78	1	0.99	Cycling_LMPP
CALM2	0.619823	1.0477e-82	1.99273e-78	0.987	0.957	Cycling_LMPP
HNRNPA2B1	0.576041	4.04543e-80	7.6944e-76	1	0.941	Cycling_LMPP
ARPC2	0.62228	3.4312e-78	6.52613e-74	0.996	0.939	Cycling_LMPP
HLA-B	0.611381	3.94513e-78	7.50363e-74	0.996	0.995	Cycling_LMPP
CDCA8	0.575199	4.49592e-78	8.55124e-74	0.64	0.182	Cycling_LMPP
CCNA2	0.58405	4.55371e-77	8.66115e-73	0.602	0.191	Cycling_LMPP
HLA-C	0.613056	1.46285e-75	2.78234e-71	1	0.961	Cycling_LMPP
SMC4	0.645389	1.05813e-72	2.01257e-68	0.835	0.499	Cycling_LMPP
NUF2	0.586193	1.53143e-72	2.91279e-68	0.602	0.203	Cycling_LMPP
NEK2	0.493497	1.00257e-70	1.90689e-66	0.5	0.109	Cycling_LMPP
TUBA1C	0.686096	1.88192e-70	3.57941e-66	0.822	0.558	Cycling_LMPP
PSRC1	0.466473	1.93936e-69	3.68867e-65	0.445	0.059	Cycling_LMPP
CDCA3	0.670133	1.2095e-68	2.30047e-64	0.657	0.231	Cycling_LMPP
CKS1B	0.700128	3.58212e-68	6.81319e-64	0.907	0.648	Cycling_LMPP
SPINK2	0.758891	5.77176e-68	1.09779e-63	0.975	0.53	Cycling_LMPP
B2M	0.461179	2.34088e-66	4.45235e-62	1	1	Cycling_LMPP
CKAP2	0.570383	5.49287e-65	1.04474e-60	0.703	0.364	Cycling_LMPP
DLGAP5	0.49138	1.13068e-63	2.15055e-59	0.551	0.146	Cycling_LMPP
HOPX	0.767468	4.24375e-62	8.07161e-58	0.839	0.34	Cycling_LMPP
HLA-A	0.589705	7.3896e-62	1.4055e-57	0.996	0.955	Cycling_LMPP
RAD21	0.571974	3.74424e-61	7.12155e-57	0.797	0.452	Cycling_LMPP
SGO2	0.525142	1.11658e-60	2.12374e-56	0.614	0.251	Cycling_LMPP
SELL	0.678339	3.74282e-60	7.11884e-56	0.877	0.405	Cycling_LMPP
AURKA	0.550171	4.91385e-60	9.34615e-56	0.568	0.18	Cycling_LMPP
KNSTRN	0.475474	5.33831e-60	1.01535e-55	0.525	0.172	Cycling_LMPP
CDK1	0.649346	7.31251e-60	1.39084e-55	0.602	0.304	Cycling_LMPP
PHF19	0.521425	2.62192e-58	4.98688e-54	0.695	0.249	Cycling_LMPP
KIF20A	0.358561	8.3343e-57	1.58518e-52	0.39	0.066	Cycling_LMPP
KIF20B	0.529437	2.31637e-56	4.40574e-52	0.631	0.292	Cycling_LMPP
GTSE1	0.491985	1.02168e-55	1.94324e-51	0.555	0.163	Cycling_LMPP
MKI67	0.576762	1.19388e-55	2.27077e-51	0.619	0.22	Cycling_LMPP
RNF26	0.459126	2.01203e-54	3.82688e-50	0.572	0.21	Cycling_LMPP
STMN1	0.489229	6.39899e-53	1.21709e-48	1	0.975	Cycling_LMPP
DEPDC1	0.374761	1.78864e-52	3.40199e-48	0.453	0.106	Cycling_LMPP
CD9	0.45178	1.69561e-49	3.22505e-45	0.559	0.141	Cycling_LMPP
MAD2L1	0.486224	7.92629e-48	1.50758e-43	0.758	0.459	Cycling_LMPP
CKAP2L	0.401246	2.99535e-47	5.69716e-43	0.479	0.154	Cycling_LMPP
TMEM71	0.330674	6.10548e-45	1.16126e-40	0.339	0.043	Cycling_LMPP
H2AFZ	0.533604	7.50901e-45	1.42821e-40	1	0.932	Cycling_LMPP
CDCA2	0.307839	1.32373e-44	2.51773e-40	0.373	0.09	Cycling_LMPP
TUBB	0.553101	7.00544e-44	1.33244e-39	0.996	0.923	Cycling_LMPP
JPT1	0.501467	1.89145e-43	3.59754e-39	0.847	0.605	Cycling_LMPP
CLDN10	0.524627	1.99917e-43	3.80242e-39	0.767	0.393	Cycling_LMPP
HLA-E	0.507788	3.50766e-43	6.67157e-39	0.949	0.783	Cycling_LMPP
TUBA1A	0.538483	4.12398e-43	7.84382e-39	0.805	0.449	Cycling_LMPP
KIF14	0.340964	6.26959e-43	1.19248e-38	0.373	0.085	Cycling_LMPP
ANP32E	0.485161	1.81613e-42	3.45428e-38	0.784	0.489	Cycling_LMPP
PRR11	0.382547	2.06295e-42	3.92372e-38	0.513	0.154	Cycling_LMPP
SMIM24	0.429718	2.7972e-42	5.32027e-38	0.936	0.533	Cycling_LMPP
DEPDC1B	0.349205	8.27001e-42	1.57296e-37	0.436	0.142	Cycling_LMPP
KIF2C	0.342744	1.11688e-41	2.12431e-37	0.415	0.133	Cycling_LMPP
EVI2B	0.472025	1.12086e-41	2.13188e-37	0.716	0.285	Cycling_LMPP
NDC80	0.42076	1.50505e-41	2.86261e-37	0.466	0.168	Cycling_LMPP
HMGB1	0.446615	1.5733e-41	2.99242e-37	1	0.996	Cycling_LMPP
PLIN3	0.469774	8.48393e-41	1.61364e-36	0.797	0.507	Cycling_LMPP
IFI6	0.606821	3.14734e-40	5.98624e-36	0.881	0.652	Cycling_LMPP
GPSM2	0.402993	3.3977e-40	6.46243e-36	0.521	0.176	Cycling_LMPP
SGO1	0.403102	5.93913e-40	1.12962e-35	0.53	0.236	Cycling_LMPP
HMGN3	0.403928	8.62211e-38	1.63992e-33	0.966	0.855	Cycling_LMPP
VAMP8	0.414094	9.28648e-38	1.76629e-33	1	0.979	Cycling_LMPP
MXD3	0.410701	2.78929e-36	5.30524e-32	0.411	0.13	Cycling_LMPP
MIS18BP1	0.44354	1.09467e-35	2.08206e-31	0.758	0.494	Cycling_LMPP
DYNLL1	0.378928	1.00245e-34	1.90666e-30	0.996	0.939	Cycling_LMPP
ENO1	0.378762	2.61583e-33	4.97532e-29	1	0.971	Cycling_LMPP
HLA-DPB1	0.402809	1.79208e-32	3.40854e-28	0.992	0.859	Cycling_LMPP
RACGAP1	0.31581	1.92373e-32	3.65894e-28	0.407	0.135	Cycling_LMPP
UBC	0.428501	2.0672e-32	3.93182e-28	0.953	0.798	Cycling_LMPP
HLA-DMA	0.439222	2.23004e-32	4.24154e-28	0.928	0.749	Cycling_LMPP
DCTN3	0.395059	2.74265e-32	5.21653e-28	0.822	0.598	Cycling_LMPP
BUB1	0.25996	2.06057e-31	3.9192e-27	0.36	0.095	Cycling_LMPP
KIF22	0.376073	2.41021e-31	4.58423e-27	0.61	0.328	Cycling_LMPP
KNL1	0.272842	8.69163e-31	1.65315e-26	0.36	0.107	Cycling_LMPP
HLA-F	0.354072	6.75321e-30	1.28446e-25	0.542	0.201	Cycling_LMPP
HLA-DRB1	0.412731	1.02277e-29	1.94531e-25	0.979	0.906	Cycling_LMPP
HLA-DPA1	0.374639	2.19078e-29	4.16686e-25	0.979	0.832	Cycling_LMPP
PHGDH	0.417149	3.12653e-29	5.94666e-25	0.678	0.333	Cycling_LMPP
CLEC2B	0.394452	2.80581e-28	5.33666e-24	0.682	0.345	Cycling_LMPP
CAPG	0.337262	4.11938e-28	7.83507e-24	0.797	0.44	Cycling_LMPP
PSMB8	0.382201	4.37204e-28	8.31563e-24	0.907	0.779	Cycling_LMPP
TMSB4X	0.322599	4.71429e-28	8.96658e-24	1	0.982	Cycling_LMPP
CKAP5	0.31742	7.81532e-28	1.48647e-23	0.458	0.2	Cycling_LMPP
NCAPH	0.253397	6.75182e-27	1.2842e-22	0.347	0.119	Cycling_LMPP
SPDL1	0.27114	1.09355e-26	2.07993e-22	0.407	0.147	Cycling_LMPP
HP1BP3	0.370087	1.54398e-26	2.93664e-22	0.64	0.408	Cycling_LMPP
PKM	0.38582	2.14335e-26	4.07664e-22	0.873	0.56	Cycling_LMPP
KIFC1	0.251886	2.34366e-26	4.45765e-22	0.314	0.105	Cycling_LMPP
TXNDC12	0.352459	2.43109e-26	4.62394e-22	0.678	0.434	Cycling_LMPP
KIF23	0.257435	3.78089e-26	7.19125e-22	0.314	0.104	Cycling_LMPP
GGH	0.36798	1.36003e-25	2.58677e-21	0.682	0.446	Cycling_LMPP
ACTG1	0.328868	1.77033e-25	3.36716e-21	0.996	0.991	Cycling_LMPP
MDK	0.277431	2.02627e-25	3.85396e-21	0.576	0.253	Cycling_LMPP
HSP90B1	0.409879	3.77895e-25	7.18755e-21	0.89	0.722	Cycling_LMPP
CD52	0.384199	4.12301e-25	7.84196e-21	0.729	0.386	Cycling_LMPP
LAT2	0.366551	5.10128e-25	9.70263e-21	0.746	0.411	Cycling_LMPP
HSD17B11	0.372927	5.91018e-25	1.12412e-20	0.911	0.752	Cycling_LMPP
GAPT	0.337284	1.27908e-24	2.43281e-20	0.619	0.286	Cycling_LMPP
TRBC2	0.323791	1.7899e-24	3.40438e-20	0.398	0.13	Cycling_LMPP
RAC2	0.337729	1.99341e-24	3.79146e-20	0.928	0.824	Cycling_LMPP
RBMX	0.357849	2.52173e-24	4.79632e-20	0.915	0.805	Cycling_LMPP
PSMB9	0.356856	3.12123e-24	5.93658e-20	0.847	0.555	Cycling_LMPP
MZT1	0.333956	3.53529e-24	6.72412e-20	0.585	0.369	Cycling_LMPP
TACC3	0.334166	4.1618e-24	7.91574e-20	0.564	0.279	Cycling_LMPP
MGST1	0.340111	7.10056e-24	1.35053e-19	0.979	0.909	Cycling_LMPP
SUN2	0.265626	9.53488e-24	1.81353e-19	0.364	0.108	Cycling_LMPP
HLA-DRA	0.309398	1.50764e-23	2.86753e-19	1	0.958	Cycling_LMPP
DNAJA1	0.36687	1.58775e-23	3.01989e-19	0.826	0.644	Cycling_LMPP
LRRFIP1	0.361775	1.76645e-23	3.3598e-19	0.758	0.512	Cycling_LMPP
CALR	0.415988	2.1854e-23	4.15663e-19	0.97	0.897	Cycling_LMPP
NCAPD2	0.263432	2.3526e-23	4.47465e-19	0.424	0.164	Cycling_LMPP
PTTG1IP	0.321139	2.69116e-23	5.11858e-19	0.572	0.28	Cycling_LMPP
TUBB6	0.33652	3.47908e-23	6.61721e-19	0.542	0.299	Cycling_LMPP
NUCB2	0.317508	6.40911e-23	1.21901e-18	0.987	0.955	Cycling_LMPP
ARHGDIB	0.293471	7.22392e-23	1.37399e-18	1	0.977	Cycling_LMPP
LGALS1	0.381754	9.24066e-23	1.75757e-18	0.775	0.452	Cycling_LMPP
ITM2C	0.287706	1.39994e-22	2.66269e-18	0.907	0.632	Cycling_LMPP
CAT	0.337798	6.11275e-22	1.16265e-17	0.975	0.894	Cycling_LMPP
TMBIM4	0.321912	8.40277e-22	1.59821e-17	0.771	0.64	Cycling_LMPP
APLP2	0.346854	1.03419e-21	1.96703e-17	0.818	0.581	Cycling_LMPP
SMC2	0.325828	1.96204e-21	3.7318e-17	0.661	0.495	Cycling_LMPP
CD59	0.322508	3.00222e-21	5.71022e-17	0.737	0.537	Cycling_LMPP
AIF1	0.277995	3.49118e-21	6.64022e-17	1	0.906	Cycling_LMPP
DDX39A	0.31855	4.5459e-21	8.64631e-17	0.742	0.491	Cycling_LMPP
SFPQ	0.330967	5.45269e-21	1.0371e-16	0.75	0.515	Cycling_LMPP
HNRNPDL	0.316262	5.52997e-21	1.0518e-16	0.975	0.895	Cycling_LMPP
CFL1	0.250099	1.17836e-20	2.24124e-16	1	0.989	Cycling_LMPP
LSM5	0.294339	1.6646e-20	3.16606e-16	0.953	0.867	Cycling_LMPP
H3F3B	0.264967	2.00006e-20	3.80411e-16	1	0.986	Cycling_LMPP
CD74	0.251187	2.40797e-20	4.57995e-16	1	0.975	Cycling_LMPP
RAN	0.258957	3.03217e-20	5.76718e-16	1	0.969	Cycling_LMPP
SELENOP	0.313728	6.46347e-20	1.22935e-15	0.64	0.338	Cycling_LMPP
CENPN	0.285596	1.78916e-19	3.40298e-15	0.517	0.274	Cycling_LMPP
TAF7	0.340988	2.22351e-19	4.22911e-15	0.78	0.597	Cycling_LMPP
CTSS	0.29702	2.31144e-19	4.39636e-15	0.572	0.284	Cycling_LMPP
HNRNPH3	0.305382	2.88549e-19	5.4882e-15	0.839	0.693	Cycling_LMPP
SMIM3	0.262953	3.57305e-19	6.79594e-15	0.559	0.27	Cycling_LMPP
CNTRL	0.322622	6.40233e-19	1.21772e-14	0.653	0.415	Cycling_LMPP
EGFL7	0.346542	9.79767e-19	1.86352e-14	0.856	0.687	Cycling_LMPP
RNASE2	0.32737	9.84611e-19	1.87273e-14	0.644	0.349	Cycling_LMPP
PSMB8-AS1	0.280509	8.6156e-18	1.63869e-13	0.653	0.376	Cycling_LMPP
CENPW	0.284924	2.24669e-17	4.27321e-13	0.775	0.524	Cycling_LMPP
NUDCD2	0.272407	2.42048e-17	4.60376e-13	0.788	0.591	Cycling_LMPP
HSPA1A	0.260269	4.38294e-17	8.33635e-13	0.411	0.185	Cycling_LMPP
HNRNPA3	0.274098	6.50952e-17	1.23811e-12	0.953	0.857	Cycling_LMPP
SRP9	0.282385	7.00247e-17	1.33187e-12	0.928	0.841	Cycling_LMPP
GSDMD	0.289565	7.51538e-17	1.42943e-12	0.758	0.569	Cycling_LMPP
PTGES3	0.264274	1.49981e-16	2.85264e-12	0.966	0.869	Cycling_LMPP
ARPC5	0.285101	2.41703e-16	4.59719e-12	0.86	0.684	Cycling_LMPP
GSTP1	0.250265	3.08809e-16	5.87355e-12	0.992	0.945	Cycling_LMPP
CD34	0.288575	6.71039e-16	1.27632e-11	0.631	0.386	Cycling_LMPP
DCAF7	0.266374	1.47464e-15	2.80477e-11	0.669	0.476	Cycling_LMPP
CDK2AP2	0.260168	1.70733e-15	3.24735e-11	0.61	0.368	Cycling_LMPP
DTYMK	0.288881	3.20311e-15	6.09231e-11	0.695	0.495	Cycling_LMPP
MND1	0.278719	3.24323e-15	6.16862e-11	0.593	0.375	Cycling_LMPP
CD99	0.303347	3.91551e-15	7.4473e-11	0.801	0.634	Cycling_LMPP
PNRC2	0.278427	1.01907e-14	1.93827e-10	0.712	0.532	Cycling_LMPP
DNAJB6	0.275715	1.0724e-14	2.0397e-10	0.792	0.646	Cycling_LMPP
NUP214	0.280271	1.09175e-14	2.07651e-10	0.475	0.247	Cycling_LMPP
EWSR1	0.268838	1.40795e-14	2.67792e-10	0.818	0.648	Cycling_LMPP
HSPA5	0.331951	3.09884e-14	5.89399e-10	0.657	0.489	Cycling_LMPP
AHSA1	0.273211	3.35545e-14	6.38206e-10	0.665	0.533	Cycling_LMPP
ENY2	0.251234	6.92873e-14	1.31784e-09	0.911	0.807	Cycling_LMPP
SEPT6	0.283682	9.38383e-14	1.7848e-09	0.86	0.74	Cycling_LMPP
PRDX1	0.270293	3.10196e-13	5.89993e-09	0.936	0.862	Cycling_LMPP
UBE2D3	0.262919	6.65233e-13	1.26527e-08	0.936	0.808	Cycling_LMPP
BZW1	0.252039	1.15171e-12	2.19055e-08	0.589	0.435	Cycling_LMPP
LITAF	0.27425	1.45177e-12	2.76127e-08	0.653	0.447	Cycling_LMPP
YWHAE	0.251721	2.85332e-12	5.42702e-08	0.907	0.806	Cycling_LMPP
TMEM173	0.250296	3.60315e-12	6.85319e-08	0.792	0.638	Cycling_LMPP
AKR1C3	0.257644	4.09987e-12	7.79796e-08	0.712	0.55	Cycling_LMPP
SYPL1	0.254709	5.79883e-12	1.10294e-07	0.75	0.617	Cycling_LMPP
MRFAP1	0.251488	8.02609e-12	1.52656e-07	0.826	0.677	Cycling_LMPP
SOX4	0.295302	1.63341e-11	3.10675e-07	0.881	0.758	Cycling_LMPP
RHEX	0.335826	1.72487e-10	3.28071e-06	0.352	0.185	Cycling_LMPP
CDC42	0.258966	2.03108e-09	3.86311e-05	0.805	0.666	Cycling_LMPP
ISG15	0.298316	2.90743e-07	0.00552993	0.716	0.616	Cycling_LMPP
ELANE	2.60815	0	0	0.936	0.196	GMP1
PRTN3	2.4896	0	0	0.931	0.192	GMP1
AZU1	1.94021	0	0	0.822	0.134	GMP1
MPO	1.53451	0	0	0.998	0.607	GMP1
CST7	1.45904	0	0	0.956	0.402	GMP1
CTSG	1.11259	5.27033e-302	1.00242e-297	0.891	0.34	GMP1
CALR	0.805777	1.74967e-275	3.32787e-271	0.968	0.892	GMP1
PRSS57	0.631525	9.04955e-262	1.72122e-257	0.998	0.981	GMP1
RPS19	0.29888	4.12817e-241	7.85178e-237	1	1	GMP1
LYZ	0.661741	2.37205e-234	4.51164e-230	0.979	0.578	GMP1
RNASE2	0.877776	1.01466e-215	1.92987e-211	0.807	0.315	GMP1
CSTA	0.784783	1.45531e-203	2.768e-199	0.527	0.082	GMP1
RNASE3	0.632875	4.13464e-185	7.86409e-181	0.433	0.062	GMP1
VAMP8	0.53483	6.84215e-177	1.30138e-172	0.999	0.978	GMP1
RPL39	0.280859	2.61151e-175	4.96709e-171	1	1	GMP1
VAMP5	0.738003	3.41344e-158	6.49236e-154	0.746	0.373	GMP1
IFI6	0.644586	2.07462e-148	3.94593e-144	0.863	0.639	GMP1
P4HB	0.506447	7.79668e-147	1.48293e-142	0.715	0.529	GMP1
SSR4	0.481736	5.69497e-143	1.08318e-138	0.958	0.94	GMP1
MNDA	0.556751	1.29944e-142	2.47154e-138	0.407	0.066	GMP1
MGST1	0.510086	6.01237e-142	1.14355e-137	0.956	0.907	GMP1
SERPINB1	0.545499	6.30681e-137	1.19956e-132	0.99	0.934	GMP1
SRGN	0.646414	1.59283e-136	3.02956e-132	0.933	0.875	GMP1
PPIB	0.4821	2.28865e-130	4.35301e-126	0.92	0.877	GMP1
FKBP2	0.422464	1.9161e-115	3.64442e-111	0.698	0.624	GMP1
CFD	0.500622	2.42251e-111	4.60762e-107	0.447	0.142	GMP1
PLAC8	0.458514	4.611e-109	8.77012e-105	0.965	0.799	GMP1
MANF	0.42689	7.97171e-106	1.51622e-101	0.581	0.478	GMP1
TNFSF13B	0.548516	2.19291e-103	4.17091e-99	0.843	0.546	GMP1
RAB32	0.454039	3.28265e-103	6.24361e-99	0.449	0.155	GMP1
GSTP1	0.42983	1.67222e-96	3.18057e-92	0.985	0.942	GMP1
IGLL1	0.643894	1.03508e-93	1.96872e-89	0.78	0.565	GMP1
BEX1	0.599709	1.12322e-93	2.13637e-89	0.611	0.45	GMP1
AGTRAP	0.368614	4.92064e-93	9.35905e-89	0.532	0.391	GMP1
PDIA6	0.318548	4.34482e-92	8.26385e-88	0.684	0.686	GMP1
GAPDH	0.257828	2.59342e-90	4.93269e-86	1	0.999	GMP1
ANXA1	0.467433	5.00695e-90	9.52322e-86	0.733	0.378	GMP1
SMIM24	0.436657	3.74906e-87	7.13072e-83	0.844	0.515	GMP1
PFDN5	0.27713	2.70932e-85	5.15312e-81	0.999	0.996	GMP1
TMEM258	0.337424	6.07781e-82	1.156e-77	0.943	0.939	GMP1
MFSD10	0.361514	2.02661e-81	3.85461e-77	0.574	0.441	GMP1
HSP90B1	0.401373	2.51689e-81	4.78713e-77	0.778	0.721	GMP1
HSPA5	0.390828	4.48955e-80	8.53911e-76	0.591	0.484	GMP1
F13A1	0.398731	6.2728e-79	1.19309e-74	0.37	0.117	GMP1
APLP2	0.356921	3.58042e-78	6.80997e-74	0.681	0.579	GMP1
XBP1	0.374973	2.22764e-75	4.23697e-71	0.515	0.325	GMP1
RASGRP2	0.368085	2.6907e-74	5.1177e-70	0.527	0.36	GMP1
IFITM3	0.443674	8.42226e-72	1.60191e-67	0.723	0.5	GMP1
NUCB2	0.341009	3.86063e-70	7.34291e-66	0.967	0.955	GMP1
SERPINB10	0.269822	1.1395e-68	2.16733e-64	0.188	0.025	GMP1
TRH	0.438071	1.01416e-64	1.92892e-60	0.567	0.292	GMP1
MYB	0.256174	1.63368e-64	3.10726e-60	0.483	0.429	GMP1
TMEM176B	0.393244	4.57143e-63	8.69486e-59	0.409	0.178	GMP1
PRDX5	0.265572	1.52791e-62	2.90609e-58	0.78	0.785	GMP1
NKG7	0.375013	2.89836e-56	5.51268e-52	0.435	0.208	GMP1
NAP1L1	0.253333	1.45508e-52	2.76756e-48	0.989	0.984	GMP1
CYBA	0.31342	6.85466e-49	1.30376e-44	0.668	0.56	GMP1
NAALADL1	0.318688	2.9887e-47	5.68451e-43	0.423	0.22	GMP1
PKM	0.32828	3.96935e-47	7.54971e-43	0.781	0.548	GMP1
TSC22D3	0.363094	5.55672e-46	1.05689e-41	0.515	0.311	GMP1
CITED2	0.281537	4.81917e-45	9.16607e-41	0.342	0.218	GMP1
SEC61G	0.254522	1.04728e-44	1.99193e-40	0.87	0.884	GMP1
STAR	0.278197	1.50078e-42	2.85448e-38	0.375	0.183	GMP1
CLU	0.280804	5.10773e-41	9.7149e-37	0.588	0.493	GMP1
RGL4	0.279936	1.5153e-40	2.88211e-36	0.319	0.148	GMP1
NCOA7	0.250734	3.61052e-40	6.8672e-36	0.358	0.235	GMP1
CD48	0.305896	2.14925e-37	4.08787e-33	0.48	0.273	GMP1
TENT5A	0.265395	2.31443e-35	4.40205e-31	0.369	0.238	GMP1
BTG1	0.255598	4.75394e-34	9.04199e-30	0.284	0.147	GMP1
HCST	0.304459	9.50087e-34	1.80707e-29	0.604	0.396	GMP1
PRAM1	0.257669	2.52882e-26	4.80981e-22	0.498	0.325	GMP1
LYZ	2.72759	0	0	0.994	0.567	GMP2
LGALS1	1.63525	0	0	0.94	0.404	GMP2
MPO	1.42104	0	0	1	0.597	GMP2
PLAC8	1.12469	0	0	0.991	0.792	GMP2
HCST	1.00748	0	0	0.874	0.359	GMP2
TMSB4X	0.988686	0	0	1	0.98	GMP2
MRPL33	0.720437	0	0	0.881	0.725	GMP2
TMSB10	0.705987	0	0	1	0.997	GMP2
RPLP2	0.278024	0	0	1	1	GMP2
RPLP1	0.268892	0	0	1	1	GMP2
FOS	1.02588	0	0	0.902	0.54	GMP2
TNFSF13B	0.833392	5.97282e-280	1.13603e-275	0.911	0.531	GMP2
UBA52	0.296176	1.17621e-268	2.23715e-264	0.999	1	GMP2
SAMHD1	0.72705	1.47388e-265	2.80332e-261	0.483	0.076	GMP2
CTSG	0.941085	8.30308e-260	1.57925e-255	0.813	0.336	GMP2
CXorf21	0.724779	9.18984e-256	1.74791e-251	0.605	0.19	GMP2
TYROBP	0.792895	2.2877e-252	4.3512e-248	0.623	0.163	GMP2
S100A9	1.00488	8.0241e-250	1.52618e-245	0.331	0.019	GMP2
GSTP1	0.65203	3.96941e-244	7.54982e-240	0.99	0.941	GMP2
S100A11	0.700237	1.76127e-240	3.34994e-236	0.621	0.236	GMP2
PYCARD	0.632683	1.87571e-230	3.56761e-226	0.869	0.689	GMP2
GRN	0.585807	2.53922e-224	4.82959e-220	0.681	0.467	GMP2
VIM	0.642901	1.53131e-217	2.91256e-213	0.9	0.704	GMP2
IRF8	0.576135	1.28955e-211	2.45273e-207	0.412	0.05	GMP2
VAMP8	0.534979	3.02885e-208	5.76088e-204	0.997	0.978	GMP2
RPL39	0.272004	2.13696e-206	4.0645e-202	1	1	GMP2
CD48	0.670884	1.08483e-204	2.06335e-200	0.662	0.247	GMP2
MNDA	0.647052	7.90638e-201	1.50379e-196	0.412	0.058	GMP2
CSTA	0.84697	6.62531e-199	1.26013e-194	0.445	0.081	GMP2
MS4A6A	0.533983	2.49592e-187	4.74725e-183	0.261	0.016	GMP2
AZU1	1.04815	8.44316e-186	1.60589e-181	0.562	0.147	GMP2
DBI	0.507749	1.9565e-185	3.72126e-181	0.911	0.86	GMP2
PRTN3	1.28894	5.88451e-184	1.11923e-179	0.623	0.21	GMP2
CSF1R	0.448817	2.52827e-178	4.80878e-174	0.325	0.042	GMP2
RNASE2	0.615012	7.29446e-174	1.38741e-169	0.745	0.31	GMP2
ANXA2	0.478114	1.1178e-167	2.12606e-163	0.51	0.354	GMP2
CYBA	0.539412	6.53013e-167	1.24203e-162	0.759	0.546	GMP2
ELANE	1.02722	1.11888e-163	2.1281e-159	0.622	0.215	GMP2
FAM107B	0.420227	6.85641e-155	1.30409e-150	0.322	0.054	GMP2
NKG7	0.52886	1.3522e-153	2.57188e-149	0.55	0.189	GMP2
ERP29	0.401488	9.1874e-153	1.74744e-148	0.958	0.952	GMP2
EMB	0.473327	3.87837e-152	7.37666e-148	0.478	0.248	GMP2
CEBPD	0.470061	7.41467e-151	1.41027e-146	0.352	0.078	GMP2
HNRNPU	0.399271	4.529e-150	8.61416e-146	0.757	0.707	GMP2
FTL	0.283627	1.20635e-149	2.29448e-145	0.999	1	GMP2
BLOC1S1	0.364715	2.10243e-148	3.99882e-144	0.692	0.66	GMP2
LAMTOR4	0.394719	7.59685e-147	1.44492e-142	0.854	0.829	GMP2
S100A8	0.545906	4.23571e-146	8.05631e-142	0.196	0.009	GMP2
NUP214	0.478175	2.37599e-142	4.51913e-138	0.427	0.232	GMP2
MCL1	0.487534	4.77393e-142	9.08001e-138	0.448	0.203	GMP2
CD74	0.525587	2.94958e-139	5.61009e-135	0.991	0.973	GMP2
SPNS3	0.548304	3.25318e-139	6.18755e-135	0.635	0.299	GMP2
CFD	0.533031	6.35097e-139	1.20795e-134	0.395	0.141	GMP2
RNASE6	0.490934	6.36316e-137	1.21027e-132	0.368	0.113	GMP2
HLA-DRA	0.471419	3.97638e-136	7.56307e-132	0.988	0.955	GMP2
NPC2	0.38422	1.5091e-131	2.87032e-127	0.816	0.778	GMP2
SERPINB8	0.353037	6.83787e-131	1.30056e-126	0.278	0.046	GMP2
NAIP	0.352432	4.42896e-128	8.42389e-124	0.257	0.06	GMP2
ZFP36	0.508234	2.13729e-127	4.06513e-123	0.458	0.189	GMP2
LCP1	0.423371	7.59478e-125	1.44453e-120	0.608	0.435	GMP2
C20orf27	0.388034	3.57314e-123	6.79612e-119	0.688	0.583	GMP2
CORO1A	0.523979	4.83507e-123	9.1963e-119	0.841	0.639	GMP2
HLA-DRB1	0.460022	1.21665e-122	2.31406e-118	0.933	0.905	GMP2
KLF6	0.549269	1.47091e-121	2.79766e-117	0.674	0.468	GMP2
H2AFJ	0.308495	5.56563e-119	1.05858e-114	0.508	0.475	GMP2
IFI27L2	0.381143	2.44283e-118	4.64627e-114	0.523	0.384	GMP2
LYST	0.379321	2.49161e-117	4.73904e-113	0.323	0.119	GMP2
MYL6	0.35809	4.5006e-116	8.56014e-112	0.982	0.97	GMP2
TSC22D3	0.536535	3.81801e-114	7.26186e-110	0.572	0.3	GMP2
TMEM205	0.281201	4.49522e-114	8.54991e-110	0.515	0.502	GMP2
KIAA0930	0.329994	7.352e-114	1.39835e-109	0.27	0.093	GMP2
STXBP2	0.259716	1.53737e-112	2.92407e-108	0.453	0.459	GMP2
HRH2	0.341334	1.46894e-111	2.79393e-107	0.274	0.066	GMP2
NREP	0.293958	9.77331e-110	1.85888e-105	0.565	0.542	GMP2
AP2S1	0.301146	4.82734e-109	9.18159e-105	0.793	0.783	GMP2
FCER1G	0.493295	1.67878e-108	3.19303e-104	0.425	0.172	GMP2
POU2F2	0.417211	2.14239e-108	4.07482e-104	0.379	0.134	GMP2
FOSL2	0.370739	2.70861e-107	5.15178e-103	0.305	0.087	GMP2
HLA-DMA	0.377558	3.75837e-107	7.14842e-103	0.781	0.75	GMP2
DUSP1	0.421965	8.19524e-107	1.55873e-102	0.37	0.19	GMP2
TIFAB	0.275747	9.23802e-106	1.75707e-101	0.186	0.015	GMP2
LST1	0.43253	3.60422e-104	6.85523e-100	0.487	0.266	GMP2
MT1F	0.333094	3.47626e-103	6.61185e-99	0.394	0.278	GMP2
CNPY3	0.275147	3.04261e-102	5.78705e-98	0.729	0.759	GMP2
SSR4	0.325465	2.62704e-100	4.99664e-96	0.935	0.942	GMP2
IRF2BP2	0.298857	1.04345e-99	1.98464e-95	0.561	0.533	GMP2
EEF1D	0.269577	1.44761e-99	2.75335e-95	0.996	0.997	GMP2
ARPC2	0.338158	3.91153e-99	7.43973e-95	0.938	0.94	GMP2
ANXA1	0.40118	3.67158e-94	6.98334e-90	0.708	0.372	GMP2
GNAI2	0.290215	2.98816e-92	5.68348e-88	0.46	0.385	GMP2
AIF1	0.374062	4.08444e-92	7.7686e-88	0.979	0.9	GMP2
ZEB2	0.293613	5.95126e-90	1.13193e-85	0.6	0.576	GMP2
PTGER4	0.2959	1.9188e-89	3.64956e-85	0.211	0.041	GMP2
UBE2J1	0.308945	1.46018e-88	2.77727e-84	0.381	0.254	GMP2
PFDN5	0.260014	6.22739e-88	1.18445e-83	0.994	0.997	GMP2
HSPB1	0.256654	1.20046e-86	2.28328e-82	0.74	0.767	GMP2
ACTG1	0.3466	6.37519e-86	1.21256e-81	0.997	0.991	GMP2
ETHE1	0.254869	1.98155e-85	3.7689e-81	0.534	0.523	GMP2
PARVG	0.302999	2.39508e-85	4.55545e-81	0.433	0.306	GMP2
ATP5F1E	0.275649	1.17152e-83	2.22823e-79	0.987	0.986	GMP2
COMMD6	0.277983	1.12744e-81	2.1444e-77	0.983	0.99	GMP2
HSP90B1	0.325512	1.19305e-81	2.26919e-77	0.737	0.725	GMP2
SYK	0.26896	4.17922e-80	7.94888e-76	0.312	0.203	GMP2
FOSB	0.355181	4.46318e-80	8.48896e-76	0.298	0.147	GMP2
COTL1	0.268165	1.69586e-78	3.22552e-74	0.276	0.146	GMP2
PSME2	0.275273	2.86319e-78	5.44579e-74	0.84	0.852	GMP2
SAT1	0.362375	7.02777e-78	1.33668e-73	0.555	0.496	GMP2
APLP2	0.271265	8.10437e-77	1.54145e-72	0.604	0.585	GMP2
SERF2	0.256762	8.60779e-77	1.6372e-72	0.999	0.997	GMP2
HLA-DMB	0.347349	1.16976e-76	2.22488e-72	0.337	0.135	GMP2
F13A1	0.35185	1.11356e-75	2.11798e-71	0.325	0.116	GMP2
ITGB2	0.312014	1.99082e-75	3.78654e-71	0.439	0.318	GMP2
RNASET2	0.289071	6.4495e-73	1.22669e-68	0.346	0.194	GMP2
EGR1	0.295318	7.80482e-73	1.48448e-68	0.236	0.068	GMP2
PLD4	0.269839	1.50249e-71	2.85773e-67	0.25	0.07	GMP2
NAP1L1	0.268546	1.00751e-70	1.91629e-66	0.987	0.984	GMP2
PMAIP1	0.266488	6.41076e-69	1.21933e-64	0.26	0.196	GMP2
PPIB	0.27147	2.00178e-68	3.80739e-64	0.867	0.882	GMP2
GLIPR1	0.381266	6.60849e-67	1.25694e-62	0.535	0.296	GMP2
HLA-DPB1	0.331735	8.16753e-66	1.55346e-61	0.929	0.854	GMP2
LSP1	0.379841	1.07214e-63	2.0392e-59	0.688	0.516	GMP2
SH3BGRL3	0.266803	2.43956e-63	4.64004e-59	0.928	0.942	GMP2
SERPINB10	0.252113	1.56413e-62	2.97497e-58	0.153	0.025	GMP2
PKM	0.350414	1.53987e-58	2.92883e-54	0.748	0.546	GMP2
NUDT7	0.273695	3.3656e-58	6.40138e-54	0.377	0.263	GMP2
FCGRT	0.30475	3.939e-58	7.49199e-54	0.582	0.483	GMP2
IFITM3	0.368454	2.26731e-57	4.31242e-53	0.634	0.505	GMP2
SATB1	0.253161	1.2213e-56	2.32291e-52	0.39	0.295	GMP2
RASGRP2	0.264767	2.29993e-54	4.37447e-50	0.452	0.365	GMP2
RNASE3	0.26108	2.43308e-53	4.62771e-49	0.244	0.075	GMP2
ZYX	0.254516	7.40865e-53	1.40913e-48	0.291	0.161	GMP2
ISG15	0.262695	3.27994e-50	6.23845e-46	0.585	0.622	GMP2
PSMB9	0.285296	1.19033e-45	2.264e-41	0.678	0.548	GMP2
RAB32	0.257084	1.13206e-44	2.15318e-40	0.292	0.166	GMP2
GSN	0.250778	1.99879e-44	3.80169e-40	0.285	0.145	GMP2
LAIR1	0.252507	1.21122e-39	2.30374e-35	0.398	0.279	GMP2
VAMP5	0.34144	1.01773e-37	1.93572e-33	0.52	0.391	GMP2
TMEM176B	0.269598	8.30259e-37	1.57915e-32	0.308	0.184	GMP2
S100A10	1.30749	1.54777e-73	2.94386e-69	0.759	0.205	Monocytes
TMSB10	1.15748	3.08276e-72	5.86342e-68	1	0.997	Monocytes
SAMHD1	1.57022	1.70698e-71	3.24667e-67	0.981	0.114	Monocytes
FCER1G	1.55061	9.47247e-67	1.80166e-62	0.963	0.194	Monocytes
HLA-DPA1	1.43114	4.42488e-59	8.41613e-55	1	0.834	Monocytes
CST3	1.05346	7.05102e-58	1.3411e-53	0.796	0.219	Monocytes
CD74	1.63841	3.32087e-55	6.3163e-51	1	0.975	Monocytes
ANXA2	1.14832	3.6834e-55	7.00583e-51	0.907	0.367	Monocytes
HLA-DRB1	1.24731	2.18582e-49	4.15743e-45	1	0.907	Monocytes
CORO1A	1.2422	1.1545e-48	2.19585e-44	1	0.659	Monocytes
HLA-DPB1	1.31023	4.19377e-47	7.97655e-43	1	0.861	Monocytes
LSP1	1.18815	2.46341e-42	4.68541e-38	0.944	0.531	Monocytes
SH3BGRL3	1.05308	3.07998e-42	5.85811e-38	1	0.94	Monocytes
LGALS1	1.67309	1.32483e-41	2.51983e-37	1	0.457	Monocytes
S100A11	1.07431	4.15688e-39	7.90638e-35	0.926	0.273	Monocytes
HLA-DRA	1.20829	1.33412e-37	2.53749e-33	1	0.959	Monocytes
C12orf75	0.955675	3.65923e-37	6.95985e-33	0.778	0.176	Monocytes
VIM	1.00899	1.21596e-36	2.31276e-32	0.963	0.723	Monocytes
CTSH	0.749414	1.90184e-36	3.6173e-32	0.593	0.041	Monocytes
CLEC4A	0.636937	1.70919e-35	3.25087e-31	0.481	0.012	Monocytes
IRF8	0.92473	1.97784e-35	3.76185e-31	0.796	0.084	Monocytes
TMSB4X	1.2706	3.38431e-34	6.43697e-30	1	0.982	Monocytes
TYROBP	1.05554	2.68293e-33	5.10293e-29	0.926	0.207	Monocytes
CLEC10A	0.589326	6.05348e-33	1.15137e-28	0.389	0.005	Monocytes
JAML	0.746577	7.16961e-33	1.36366e-28	0.5	0.018	Monocytes
GRN	0.904155	1.40871e-32	2.67936e-28	0.889	0.488	Monocytes
LILRB4	0.697311	1.83079e-32	3.48217e-28	0.556	0.025	Monocytes
ACTB	0.705918	2.1994e-32	4.18326e-28	1	0.998	Monocytes
DBI	0.814996	4.02208e-32	7.65e-28	1	0.864	Monocytes
BLOC1S1	0.759088	4.11835e-32	7.8331e-28	0.889	0.662	Monocytes
HLA-DMA	0.873497	2.01485e-31	3.83225e-27	0.963	0.752	Monocytes
FCGRT	0.850074	2.30923e-30	4.39215e-26	0.981	0.49	Monocytes
CYBA	0.882614	4.90106e-30	9.32183e-26	0.944	0.566	Monocytes
HLA-DQB1	0.899807	6.03012e-30	1.14693e-25	0.685	0.158	Monocytes
CFL1	0.682319	1.86835e-29	3.5536e-25	1	0.989	Monocytes
ALDH2	0.757202	7.72435e-29	1.46917e-24	0.593	0.122	Monocytes
HLA-DMB	0.855978	2.48574e-28	4.72788e-24	0.741	0.153	Monocytes
PLAC8	1.00345	1.45554e-26	2.76843e-22	0.981	0.812	Monocytes
TIFAB	0.590754	2.74375e-25	5.21861e-21	0.5	0.031	Monocytes
MYL6	0.612597	8.05473e-25	1.53201e-20	1	0.971	Monocytes
CFP	0.681804	1.61471e-24	3.07118e-20	0.463	0.06	Monocytes
IGSF6	0.480027	2.31509e-24	4.40331e-20	0.426	0.018	Monocytes
LYZ	1.30477	2.50335e-23	4.76137e-19	0.963	0.61	Monocytes
FGL2	0.574213	5.49024e-22	1.04424e-17	0.407	0.028	Monocytes
ITGB7	0.481466	1.35187e-21	2.57125e-17	0.352	0.045	Monocytes
FOS	0.961807	1.4075e-21	2.67707e-17	1	0.576	Monocytes
ITGB2	0.754146	2.42761e-21	4.61731e-17	0.722	0.329	Monocytes
MYL12A	0.606614	9.65367e-21	1.83613e-16	0.963	0.892	Monocytes
KCTD12	0.386906	7.85809e-19	1.49461e-14	0.352	0.018	Monocytes
ERP29	0.54938	1.59651e-18	3.03656e-14	1	0.952	Monocytes
PHACTR1	0.597851	2.95109e-18	5.61298e-14	0.611	0.174	Monocytes
CD48	0.788361	1.3098e-17	2.49124e-13	0.704	0.288	Monocytes
GSN	0.695969	2.88996e-17	5.4967e-13	0.537	0.158	Monocytes
HERPUD1	0.652865	2.89459e-17	5.50551e-13	0.611	0.26	Monocytes
CARD16	0.623195	3.18568e-17	6.05917e-13	0.667	0.352	Monocytes
PYCARD	0.694714	4.25089e-17	8.08519e-13	0.963	0.707	Monocytes
GPR183	0.532247	8.86273e-17	1.68569e-12	0.37	0.028	Monocytes
CACNA2D3	0.46088	1.1503e-16	2.18788e-12	0.296	0.015	Monocytes
ATP5F1E	0.486602	1.34987e-16	2.56745e-12	1	0.986	Monocytes
RNASE6	0.664692	4.63324e-16	8.81242e-12	0.593	0.138	Monocytes
CAPG	0.649303	5.29019e-16	1.00619e-11	0.852	0.446	Monocytes
COTL1	0.615117	6.21139e-16	1.18141e-11	0.574	0.157	Monocytes
HCLS1	0.55264	2.55595e-15	4.86142e-11	0.741	0.463	Monocytes
LGALS2	0.518081	2.85329e-15	5.42696e-11	0.204	0.005	Monocytes
TIMP1	0.5892	4.2277e-15	8.04109e-11	0.889	0.685	Monocytes
GSTP1	0.643177	5.18313e-15	9.85831e-11	1	0.946	Monocytes
SCPEP1	0.441528	6.39193e-15	1.21575e-10	0.426	0.14	Monocytes
CAP1	0.481583	7.15631e-15	1.36113e-10	0.759	0.681	Monocytes
SRP14	0.458659	1.10485e-14	2.10143e-10	1	0.985	Monocytes
HLA-DQA1	0.290083	1.24304e-14	2.36426e-10	0.167	0.002	Monocytes
UPK3A	0.272343	2.24021e-14	4.26088e-10	0.222	0.006	Monocytes
NFKB1	0.458674	2.27536e-14	4.32774e-10	0.463	0.178	Monocytes
NPC2	0.557272	3.33167e-14	6.33683e-10	0.926	0.781	Monocytes
SEMA4A	0.407646	9.11058e-14	1.73283e-09	0.333	0.04	Monocytes
ZFP36	0.693632	1.69806e-13	3.2297e-09	0.667	0.215	Monocytes
AP2S1	0.430238	2.0417e-13	3.88331e-09	0.833	0.784	Monocytes
SNRNP25	0.539429	3.01583e-13	5.73611e-09	0.778	0.561	Monocytes
ARPC2	0.550051	3.16824e-13	6.026e-09	0.981	0.94	Monocytes
AL096865.1	0.338896	4.17595e-13	7.94266e-09	0.296	0.022	Monocytes
RGS10	0.542102	6.78965e-13	1.29139e-08	0.852	0.521	Monocytes
LGMN	0.333459	7.39429e-13	1.40639e-08	0.204	0.008	Monocytes
SAT1	0.780409	1.16143e-12	2.20904e-08	0.704	0.501	Monocytes
ALOX5AP	0.357512	1.30786e-12	2.48755e-08	0.426	0.071	Monocytes
HCST	0.684312	2.16844e-12	4.12437e-08	0.833	0.411	Monocytes
POU2F2	0.560347	2.87659e-12	5.47128e-08	0.556	0.157	Monocytes
MS4A7	0.415721	4.31904e-12	8.21482e-08	0.333	0.04	Monocytes
PAK1	0.425472	4.64104e-12	8.82726e-08	0.537	0.273	Monocytes
CSK	0.446751	5.21882e-12	9.92619e-08	0.426	0.211	Monocytes
GNAI2	0.487463	5.24631e-12	9.97849e-08	0.611	0.391	Monocytes
RNH1	0.447371	7.73977e-12	1.4721e-07	0.685	0.519	Monocytes
LST1	0.575565	8.41003e-12	1.59959e-07	0.685	0.287	Monocytes
TPP1	0.501219	1.38547e-11	2.63517e-07	0.611	0.322	Monocytes
ARPC4	0.456633	1.58779e-11	3.01998e-07	0.796	0.624	Monocytes
PSMB9	0.568942	2.06869e-11	3.93465e-07	0.87	0.56	Monocytes
MS4A4A	0.25512	2.35751e-11	4.48398e-07	0.241	0.016	Monocytes
ATP5MG	0.32163	2.58615e-11	4.91885e-07	1	0.997	Monocytes
DTX4	0.294314	3.18653e-11	6.06079e-07	0.222	0.013	Monocytes
MRPL33	0.476922	3.7691e-11	7.16883e-07	0.889	0.74	Monocytes
S100A4	0.626407	4.71675e-11	8.97126e-07	0.981	0.853	Monocytes
FABP5	0.4773	5.00888e-11	9.52688e-07	0.981	0.896	Monocytes
PTPRE	0.466282	5.39643e-11	1.0264e-06	0.407	0.107	Monocytes
NAGA	0.381361	9.45884e-11	1.79907e-06	0.37	0.131	Monocytes
NDRG2	0.324462	9.93815e-11	1.89024e-06	0.333	0.053	Monocytes
PLD4	0.428573	1.13843e-10	2.1653e-06	0.407	0.088	Monocytes
LY86	0.311289	1.3706e-10	2.60689e-06	0.241	0.018	Monocytes
KCNMB1	0.302464	1.39323e-10	2.64992e-06	0.278	0.029	Monocytes
PLP2	0.485008	1.90493e-10	3.62318e-06	0.815	0.705	Monocytes
SPIB	0.336245	2.29871e-10	4.37214e-06	0.241	0.019	Monocytes
ARPC3	0.383194	2.60576e-10	4.95616e-06	0.981	0.982	Monocytes
BLNK	0.302423	2.83898e-10	5.39974e-06	0.278	0.031	Monocytes
CSF2RA	0.351099	2.98195e-10	5.67167e-06	0.296	0.039	Monocytes
LCP1	0.487831	4.03011e-10	7.66528e-06	0.796	0.451	Monocytes
VAMP8	0.478578	4.84554e-10	9.21622e-06	1	0.98	Monocytes
COX17	0.391871	4.93648e-10	9.38919e-06	0.722	0.626	Monocytes
TSC22D3	0.545424	6.22259e-10	1.18354e-05	0.722	0.326	Monocytes
CLEC4G	0.372962	6.43692e-10	1.2243e-05	0.278	0.036	Monocytes
ACTG1	0.483852	6.60221e-10	1.25574e-05	1	0.991	Monocytes
MYO1F	0.505928	6.796e-10	1.2926e-05	0.556	0.263	Monocytes
GNB2	0.389541	8.39933e-10	1.59755e-05	0.556	0.374	Monocytes
B2M	0.366997	1.03391e-09	1.96651e-05	1	1	Monocytes
BASP1	0.261199	1.17204e-09	2.22922e-05	0.296	0.038	Monocytes
ANXA1	0.549002	1.30665e-09	2.48524e-05	0.815	0.405	Monocytes
RNASE2	0.49059	1.30793e-09	2.48768e-05	0.778	0.354	Monocytes
CD86	0.262627	1.53034e-09	2.91071e-05	0.185	0.011	Monocytes
ARPC1B	0.431142	1.58217e-09	3.00928e-05	0.815	0.63	Monocytes
HNRNPU	0.433452	1.58425e-09	3.01324e-05	0.815	0.712	Monocytes
FXYD5	0.423768	1.65985e-09	3.15704e-05	0.981	0.96	Monocytes
CHMP2A	0.351158	1.84524e-09	3.50964e-05	0.685	0.626	Monocytes
CD180	0.3297	2.00049e-09	3.80493e-05	0.259	0.032	Monocytes
SERF2	0.362954	2.2671e-09	4.31202e-05	1	0.997	Monocytes
GNAS	0.395081	2.82961e-09	5.38192e-05	0.778	0.598	Monocytes
KLF4	0.284595	2.84655e-09	5.41413e-05	0.204	0.014	Monocytes
SPNS3	0.465026	3.12829e-09	5.95001e-05	0.741	0.332	Monocytes
STXBP2	0.416917	3.30406e-09	6.28433e-05	0.722	0.457	Monocytes
KLF6	0.647647	5.28272e-09	0.000100477	0.667	0.488	Monocytes
CNDP2	0.318119	5.53107e-09	0.000105201	0.426	0.257	Monocytes
HACD4	0.412096	8.38802e-09	0.00015954	0.63	0.407	Monocytes
RGS19	0.439019	9.96658e-09	0.000189564	0.537	0.226	Monocytes
H2AFY	0.395862	1.1904e-08	0.000226414	0.907	0.794	Monocytes
FCER1A	0.458144	1.20066e-08	0.000228365	0.685	0.29	Monocytes
DAPP1	0.342676	1.36972e-08	0.00026052	0.333	0.068	Monocytes
UHRF1	0.30704	1.40464e-08	0.000267163	0.296	0.142	Monocytes
ARPC5	0.397818	1.50789e-08	0.000286801	0.87	0.688	Monocytes
ST14	0.296198	1.79693e-08	0.000341776	0.222	0.027	Monocytes
GPSM3	0.426613	1.83137e-08	0.000348326	0.741	0.566	Monocytes
CCDC88A	0.410868	2.15348e-08	0.000409592	0.722	0.517	Monocytes
COMMD6	0.333446	2.85591e-08	0.000543193	1	0.989	Monocytes
RHOC	0.398307	2.95004e-08	0.000561099	0.37	0.149	Monocytes
AIF1	0.464739	3.07081e-08	0.000584069	0.981	0.907	Monocytes
UBL7	0.319258	3.08769e-08	0.00058728	0.519	0.45	Monocytes
SLC25A5	0.314094	3.70229e-08	0.000704175	0.944	0.958	Monocytes
TNNI2	0.255391	5.41848e-08	0.0010306	0.185	0.017	Monocytes
CLN8	0.317116	7.67626e-08	0.00146002	0.296	0.129	Monocytes
ACAA1	0.261236	7.84594e-08	0.0014923	0.204	0.087	Monocytes
HLX	0.299905	8.74912e-08	0.00166408	0.315	0.061	Monocytes
RCC2	0.284025	9.96379e-08	0.00189511	0.407	0.324	Monocytes
FLT3	0.350305	1.05562e-07	0.00200779	0.37	0.092	Monocytes
OAZ1	0.308924	1.27791e-07	0.00243059	1	0.994	Monocytes
RIPOR2	0.305976	1.29371e-07	0.00246063	0.352	0.245	Monocytes
COMMD9	0.335697	1.35131e-07	0.00257019	0.593	0.442	Monocytes
UBE2E2	0.318965	1.62345e-07	0.0030878	0.315	0.108	Monocytes
LIMD2	0.425058	1.63603e-07	0.00311174	0.852	0.791	Monocytes
PKM	0.398714	1.97165e-07	0.00375007	0.889	0.565	Monocytes
TAPBP	0.406486	1.98422e-07	0.00377398	0.667	0.446	Monocytes
CSTB	0.374635	2.31801e-07	0.00440886	0.815	0.7	Monocytes
VSIR	0.419154	2.59279e-07	0.00493148	0.444	0.226	Monocytes
MNDA	0.463954	2.86318e-07	0.00544577	0.37	0.093	Monocytes
ERCC1	0.372721	2.91363e-07	0.00554173	0.685	0.532	Monocytes
CNPY3	0.374414	3.4313e-07	0.00652632	0.815	0.755	Monocytes
AHR	0.260988	3.55224e-07	0.00675635	0.222	0.037	Monocytes
PFN1	0.345825	3.84721e-07	0.0073174	0.926	0.892	Monocytes
PPP1CA	0.319041	3.86049e-07	0.00734265	0.852	0.814	Monocytes
MCRS1	0.32335	3.8816e-07	0.0073828	0.519	0.347	Monocytes
C20orf27	0.379126	4.04505e-07	0.00769369	0.778	0.593	Monocytes
NKG7	0.482616	4.28101e-07	0.00814249	0.519	0.225	Monocytes
CIITA	0.320896	4.89164e-07	0.0093039	0.352	0.103	Monocytes
NAIP	0.291873	5.09217e-07	0.00968532	0.333	0.079	Monocytes
LSP1	1.4677	2.03119e-187	3.86332e-183	1	0.527	DC
BLNK	1.26826	5.9225e-186	1.12646e-181	0.842	0.02	DC
IRF8	1.48572	2.64924e-156	5.03885e-152	0.877	0.076	DC
HERPUD1	1.22207	3.74165e-156	7.11661e-152	0.788	0.254	DC
RNASE6	1.32234	2.83843e-132	5.3987e-128	0.822	0.13	DC
CD74	1.48142	2.05893e-125	3.91608e-121	1	0.975	DC
IGHM	1.35834	2.75652e-113	5.2429e-109	0.774	0.093	DC
CORO1A	1.19767	7.24676e-113	1.37833e-108	0.993	0.655	DC
PLAC8	1.3348	8.66095e-108	1.64731e-103	0.973	0.81	DC
TMSB10	0.809681	1.8162e-96	3.45442e-92	1	0.997	DC
ITM2C	1.01466	1.66363e-91	3.16422e-87	0.986	0.634	DC
HLA-DPA1	1.04283	9.45987e-89	1.79927e-84	0.993	0.833	DC
HLA-DMB	0.936482	1.09946e-87	2.09117e-83	0.774	0.147	DC
HLA-DRA	1.08661	8.50152e-86	1.61699e-81	1	0.958	DC
CXorf21	1.02519	2.25612e-84	4.29113e-80	0.849	0.224	DC
ADA	0.936766	7.93965e-84	1.51012e-79	0.767	0.284	DC
HLA-DRB1	0.97674	8.57257e-83	1.6305e-78	1	0.906	DC
HLA-DPB1	1.0062	2.83582e-81	5.39373e-77	1	0.86	DC
IGKC	0.799446	7.89194e-80	1.50105e-75	0.507	0.041	DC
JCHAIN	1.28475	5.42406e-79	1.03166e-74	0.336	0.002	DC
SPIB	0.809321	3.61772e-78	6.8809e-74	0.418	0.014	DC
LGALS1	1.5565	2.97714e-77	5.66251e-73	0.945	0.453	DC
TMSB4X	1.17107	1.3151e-75	2.50133e-71	1	0.982	DC
TCF4	0.881561	1.83159e-75	3.48369e-71	0.726	0.32	DC
GPR183	0.78914	1.62621e-73	3.09306e-69	0.486	0.023	DC
NREP	0.765288	2.66867e-73	5.0758e-69	0.842	0.54	DC
HLA-DMA	0.831836	2.65901e-72	5.05745e-68	0.979	0.75	DC
ERP29	0.694046	3.53907e-72	6.73131e-68	0.993	0.952	DC
C12orf75	0.784266	2.70606e-62	5.14693e-58	0.644	0.172	DC
SRP14	0.56055	2.25766e-58	4.29408e-54	1	0.985	DC
LILRB4	0.626063	5.5162e-58	1.04918e-53	0.418	0.022	DC
PLD4	0.673922	2.21412e-57	4.21125e-53	0.562	0.082	DC
JAML	0.579896	1.64384e-56	3.12658e-52	0.37	0.015	DC
GSN	0.73612	9.42071e-54	1.79182e-49	0.644	0.153	DC
SAMHD1	0.848063	1.10817e-52	2.10773e-48	0.63	0.111	DC
TIFAB	0.543077	6.05455e-52	1.15158e-47	0.418	0.027	DC
CYTH4	0.46124	2.14887e-51	4.08716e-47	0.342	0.017	DC
CXCR4	0.824489	3.16659e-51	6.02285e-47	0.87	0.364	DC
ACTG1	0.705973	7.66324e-51	1.45755e-46	1	0.991	DC
DBI	0.652081	4.44692e-49	8.45805e-45	0.959	0.864	DC
AL096865.1	0.465928	1.64699e-46	3.13257e-42	0.342	0.019	DC
ACY3	0.633824	9.11166e-46	1.73304e-41	0.322	0.027	DC
B2M	0.544163	8.7381e-45	1.66199e-40	1	1	DC
ERCC1	0.557593	5.78066e-43	1.09948e-38	0.733	0.53	DC
IRF7	0.747011	7.07535e-42	1.34573e-37	0.548	0.185	DC
HCST	0.797633	6.66396e-41	1.26748e-36	0.863	0.406	DC
MS4A4A	0.379024	3.18543e-40	6.05869e-36	0.281	0.013	DC
TYROBP	0.748544	5.43287e-40	1.03333e-35	0.699	0.204	DC
PLP2	0.645692	4.30669e-39	8.19133e-35	0.918	0.702	DC
DDIT4	0.63176	5.10705e-39	9.71362e-35	0.384	0.072	DC
H2AFY	0.554683	1.33626e-38	2.54156e-34	0.932	0.793	DC
RUNX2	0.472869	1.71081e-38	3.25396e-34	0.418	0.061	DC
CAPG	0.674255	8.26707e-38	1.5724e-33	0.781	0.443	DC
ARPC2	0.544635	4.72367e-35	8.98441e-31	0.993	0.939	DC
ACTB	0.445633	1.54032e-34	2.92969e-30	1	0.998	DC
HLA-B	0.540185	1.56321e-34	2.97322e-30	1	0.995	DC
SMIM14	0.505798	3.76062e-34	7.15269e-30	0.384	0.066	DC
MYL12A	0.574082	4.65472e-34	8.85327e-30	0.959	0.891	DC
RUBCNL	0.277893	8.93487e-34	1.69941e-29	0.171	0.007	DC
LAT2	0.629409	2.38535e-33	4.53694e-29	0.788	0.413	DC
SPNS3	0.641941	3.12342e-33	5.94074e-29	0.76	0.328	DC
SELL	0.631733	4.00119e-33	7.61025e-29	0.87	0.409	DC
TNNI2	0.345586	7.686e-33	1.46188e-28	0.247	0.014	DC
BCL11A	0.546321	1.3085e-32	2.48876e-28	0.678	0.432	DC
IL3RA	0.457216	2.09331e-32	3.98148e-28	0.342	0.054	DC
ZFP36	0.616993	3.99201e-32	7.5928e-28	0.63	0.211	DC
UBL7	0.435957	2.78593e-31	5.29885e-27	0.603	0.448	DC
UGCG	0.312942	4.40386e-31	8.37615e-27	0.178	0.057	DC
IFI16	0.594728	8.05418e-31	1.53191e-26	0.795	0.449	DC
ALDH2	0.46623	1.22923e-30	2.33799e-26	0.418	0.12	DC
LGMN	0.311996	1.38379e-30	2.63197e-26	0.185	0.006	DC
FOS	0.794189	6.80125e-30	1.2936e-25	0.884	0.573	DC
SOX4	0.629104	7.93774e-30	1.50976e-25	0.911	0.759	DC
VAMP8	0.494511	2.10423e-29	4.00224e-25	0.993	0.98	DC
NPC2	0.496057	8.83225e-29	1.67989e-24	0.897	0.78	DC
SEL1L3	0.327507	1.23603e-28	2.35093e-24	0.24	0.02	DC
IDH3A	0.355705	4.77823e-28	9.0882e-24	0.329	0.147	DC
UHRF1	0.372934	6.70939e-28	1.27613e-23	0.329	0.14	DC
CD180	0.346718	3.2087e-27	6.10294e-23	0.281	0.029	DC
SATB1	0.490843	3.3909e-27	6.44949e-23	0.651	0.3	DC
LPXN	0.380154	3.66456e-27	6.97e-23	0.356	0.084	DC
FCER1G	0.633121	5.85294e-27	1.11323e-22	0.568	0.193	DC
CTSS	0.514938	2.78602e-26	5.299e-22	0.575	0.287	DC
CD53	0.475555	6.40537e-26	1.2183e-21	0.705	0.482	DC
STMN1	0.618708	8.37541e-26	1.593e-21	0.993	0.975	DC
CST3	0.426881	1.3521e-25	2.57169e-21	0.473	0.218	DC
ITGB7	0.282916	1.37603e-25	2.61722e-21	0.253	0.044	DC
CLEC4A	0.289284	3.82502e-25	7.27518e-21	0.192	0.012	DC
MEF2C	0.418079	4.75165e-25	9.03764e-21	0.534	0.342	DC
HLA-DQB1	0.480679	6.45909e-25	1.22852e-20	0.5	0.156	DC
SCPEP1	0.352281	1.07816e-24	2.05066e-20	0.356	0.138	DC
ID2	0.591896	1.75339e-24	3.33494e-20	0.404	0.157	DC
CFL1	0.39669	1.98592e-24	3.77721e-20	1	0.989	DC
MYL6	0.405816	2.00444e-24	3.81244e-20	1	0.971	DC
CACNA2D3	0.285929	2.56206e-24	4.87304e-20	0.205	0.013	DC
FAM30A	0.567374	3.60818e-24	6.86276e-20	0.767	0.562	DC
PPP1R18	0.475273	3.97312e-24	7.55687e-20	0.664	0.329	DC
CNPY3	0.440999	1.20848e-23	2.29853e-19	0.836	0.754	DC
HLA-C	0.45557	1.41026e-23	2.68231e-19	0.993	0.962	DC
PHACTR1	0.422793	2.3122e-23	4.39781e-19	0.39	0.173	DC
IKZF1	0.392501	3.05057e-23	5.80218e-19	0.541	0.302	DC
CARHSP1	0.418019	3.68516e-23	7.00918e-19	0.637	0.421	DC
AFF3	0.3084	4.39515e-23	8.35958e-19	0.288	0.047	DC
POU2F2	0.489366	5.85159e-23	1.11297e-18	0.479	0.155	DC
GABARAPL2	0.363471	1.00642e-22	1.9142e-18	0.781	0.716	DC
SEPT9	0.373551	1.15431e-22	2.19549e-18	0.39	0.151	DC
RNASEH2B	0.383412	1.25863e-22	2.39391e-18	0.705	0.608	DC
FLT3	0.388333	1.27833e-22	2.43139e-18	0.384	0.089	DC
CYSLTR1	0.434456	1.36059e-22	2.58784e-18	0.466	0.145	DC
SH3BGRL3	0.456556	1.5255e-22	2.90151e-18	0.993	0.939	DC
CORO1C	0.259491	1.99579e-22	3.79598e-18	0.233	0.192	DC
GRN	0.491725	2.16252e-22	4.1131e-18	0.76	0.486	DC
SEPT6	0.429286	4.64735e-22	8.83925e-18	0.842	0.741	DC
AL357060.1	0.259274	5.68609e-22	1.0815e-17	0.205	0.021	DC
NAP1L1	0.395448	1.36674e-21	2.59953e-17	0.993	0.984	DC
TRAF3IP3	0.456139	2.17483e-21	4.13653e-17	0.555	0.249	DC
CCDC50	0.331769	2.70137e-21	5.13801e-17	0.253	0.07	DC
TSTD1	0.374664	3.08543e-21	5.86849e-17	0.788	0.703	DC
CLN8	0.345718	1.60893e-20	3.06019e-16	0.315	0.127	DC
SLC25A5	0.365958	5.52242e-20	1.05036e-15	1	0.957	DC
LDLRAD4	0.306276	6.82865e-20	1.29881e-15	0.281	0.097	DC
BLOC1S1	0.405142	7.50361e-20	1.42719e-15	0.774	0.662	DC
MZB1	0.446898	8.66787e-20	1.64863e-15	0.329	0.082	DC
ZDHHC17	0.260825	2.75495e-19	5.23992e-15	0.24	0.049	DC
NXT2	0.306746	3.37319e-19	6.4158e-15	0.295	0.15	DC
CACNB4	0.308565	1.26461e-18	2.40528e-14	0.288	0.058	DC
MEF2A	0.278525	2.2204e-18	4.2232e-14	0.295	0.07	DC
RAC2	0.401142	2.99877e-18	5.70366e-14	0.932	0.825	DC
GNAS	0.355828	4.01704e-18	7.64041e-14	0.74	0.597	DC
PAK1	0.280175	4.90427e-18	9.32793e-14	0.356	0.273	DC
MX1	0.471795	6.7751e-18	1.28862e-13	0.575	0.293	DC
CCDC88A	0.356307	1.37037e-17	2.60645e-13	0.651	0.516	DC
RIPOR2	0.3402	1.53971e-17	2.92854e-13	0.452	0.242	DC
MDM4	0.37327	1.71464e-17	3.26125e-13	0.534	0.314	DC
RGS19	0.387692	2.2222e-17	4.22662e-13	0.473	0.224	DC
ARPC5	0.373963	2.29755e-17	4.36994e-13	0.842	0.686	DC
PLIN3	0.334599	3.11894e-17	5.93222e-13	0.603	0.512	DC
ARPC3	0.315865	3.13061e-17	5.95442e-13	1	0.982	DC
ZDHHC12	0.279683	3.14107e-17	5.97432e-13	0.555	0.503	DC
GPSM3	0.415719	3.26506e-17	6.21015e-13	0.753	0.564	DC
CYBA	0.41358	1.02012e-16	1.94026e-12	0.801	0.565	DC
PSMB9	0.437684	1.54785e-16	2.944e-12	0.801	0.558	DC
IRF2BP2	0.36493	1.89159e-16	3.59781e-12	0.658	0.534	DC
NKG7	0.343974	2.00402e-16	3.81165e-12	0.548	0.222	DC
OFD1	0.309979	2.82642e-16	5.37585e-12	0.445	0.281	DC
DBNL	0.320525	3.31893e-16	6.31261e-12	0.514	0.378	DC
SP110	0.401526	3.52311e-16	6.70096e-12	0.575	0.38	DC
BCL2	0.298501	3.85624e-16	7.33457e-12	0.315	0.085	DC
AKNA	0.322107	3.91856e-16	7.4531e-12	0.336	0.11	DC
ST6GALNAC4	0.254559	4.22865e-16	8.04289e-12	0.295	0.131	DC
CCR2	0.265339	4.54434e-16	8.64333e-12	0.171	0.02	DC
ATP5MG	0.259646	4.81161e-16	9.15168e-12	1	0.997	DC
ATP5F1E	0.292904	5.69497e-16	1.08318e-11	1	0.986	DC
TMED10	0.33777	1.2633e-15	2.4028e-11	0.63	0.48	DC
PDE7A	0.315681	1.27561e-15	2.42621e-11	0.411	0.155	DC
DDX5	0.342927	1.3854e-15	2.63504e-11	0.945	0.867	DC
SERPINB8	0.274765	1.75775e-15	3.34324e-11	0.295	0.067	DC
TIFA	0.300315	1.75987e-15	3.34728e-11	0.404	0.168	DC
NUDT5	0.331758	2.21294e-15	4.20902e-11	0.76	0.613	DC
PSME2	0.368344	3.49492e-15	6.64734e-11	0.904	0.85	DC
PPM1K	0.301969	5.62762e-15	1.07037e-10	0.411	0.209	DC
KLF6	0.44415	5.70942e-15	1.08593e-10	0.74	0.486	DC
CAP1	0.315491	6.93804e-15	1.31961e-10	0.767	0.68	DC
SLC38A1	0.276235	7.38575e-15	1.40477e-10	0.288	0.145	DC
STARD4-AS1	0.278982	1.15779e-14	2.20212e-10	0.233	0.088	DC
LCP1	0.362771	1.2439e-14	2.36589e-10	0.705	0.449	DC
LITAF	0.383789	1.48907e-14	2.83221e-10	0.685	0.448	DC
MGAT1	0.285213	1.55958e-14	2.96632e-10	0.356	0.194	DC
HCLS1	0.300899	1.68239e-14	3.19991e-10	0.562	0.463	DC
GAPT	0.398064	3.88716e-14	7.39339e-10	0.541	0.29	DC
PTPN1	0.259453	4.24445e-14	8.07295e-10	0.363	0.25	DC
AHNAK	0.329533	4.66368e-14	8.87032e-10	0.452	0.182	DC
NAGK	0.329942	4.7697e-14	9.07198e-10	0.39	0.234	DC
ADAM28	0.306145	5.28e-14	1.00426e-09	0.349	0.125	DC
CDK2AP2	0.316746	5.35453e-14	1.01843e-09	0.479	0.373	DC
SEC61B	0.379322	5.92793e-14	1.12749e-09	0.959	0.922	DC
FABP5	0.316655	8.41755e-14	1.60102e-09	0.904	0.896	DC
TUBA1A	0.413899	8.61617e-14	1.6388e-09	0.596	0.456	DC
SASH3	0.295323	1.0715e-13	2.038e-09	0.288	0.125	DC
GNG7	0.272479	1.35731e-13	2.5816e-09	0.288	0.113	DC
EVI2A	0.331379	2.29317e-13	4.3616e-09	0.377	0.137	DC
PRKCB	0.315039	3.31935e-13	6.3134e-09	0.432	0.188	DC
HMGN3	0.307855	3.64178e-13	6.92667e-09	0.938	0.856	DC
RHOC	0.308648	4.56715e-13	8.68672e-09	0.342	0.147	DC
DENND6B	0.322366	1.07642e-12	2.04735e-08	0.363	0.156	DC
SH3KBP1	0.292873	1.53983e-12	2.92875e-08	0.418	0.221	DC
GSTP1	0.336205	2.85474e-12	5.42972e-08	0.979	0.946	DC
PPP1CA	0.299327	3.7829e-12	7.19507e-08	0.89	0.813	DC
APBB1IP	0.27498	4.76452e-12	9.06211e-08	0.425	0.296	DC
PYCARD	0.348315	5.06016e-12	9.62443e-08	0.815	0.706	DC
ADD3	0.267549	5.47839e-12	1.04199e-07	0.397	0.175	DC
SARAF	0.287376	1.04931e-11	1.99579e-07	0.781	0.741	DC
MOB1A	0.261837	1.14675e-11	2.18112e-07	0.507	0.414	DC
STX7	0.258324	1.49945e-11	2.85196e-07	0.39	0.228	DC
TOP1	0.251931	1.5974e-11	3.03825e-07	0.616	0.517	DC
UBE2J1	0.304135	1.63376e-11	3.10742e-07	0.493	0.263	DC
MKI67	0.284113	2.54846e-11	4.84717e-07	0.295	0.228	DC
DDAH2	0.343472	2.68156e-11	5.10032e-07	0.651	0.441	DC
CSK	0.261843	2.75501e-11	5.24002e-07	0.384	0.209	DC
BUB3	0.253125	3.15957e-11	6.00951e-07	0.575	0.608	DC
HLA-A	0.275851	3.53416e-11	6.72197e-07	1	0.956	DC
CD48	0.34597	3.92487e-11	7.46511e-07	0.562	0.286	DC
TAP1	0.280116	4.18251e-11	7.95513e-07	0.384	0.213	DC
AKAP9	0.264252	5.68577e-11	1.08143e-06	0.514	0.484	DC
SYK	0.280559	7.32312e-11	1.39286e-06	0.356	0.212	DC
CBX6	0.256814	1.0057e-10	1.91285e-06	0.37	0.215	DC
SUB1	0.273289	1.00764e-10	1.91653e-06	0.993	0.957	DC
TSC22D3	0.304048	3.28648e-10	6.25089e-06	0.589	0.324	DC
RNASET2	0.300994	4.17539e-10	7.94159e-06	0.37	0.208	DC
SPCS1	0.283005	4.47402e-10	8.50959e-06	0.932	0.877	DC
KPNA2	0.36888	4.90312e-10	9.32574e-06	0.39	0.366	DC
CTSC	0.297903	4.99563e-10	9.5017e-06	0.671	0.625	DC
NUSAP1	0.290822	1.12543e-09	2.14057e-05	0.363	0.384	DC
IFI27L2	0.287378	1.35138e-09	2.57032e-05	0.548	0.396	DC
HMGN2	0.426327	1.49814e-09	2.84946e-05	0.959	0.956	DC
MAP1A	0.293344	1.93132e-09	3.67336e-05	0.349	0.172	DC
TMIGD2	0.290624	1.93641e-09	3.68305e-05	0.548	0.325	DC
CD44	0.312012	2.08787e-09	3.97112e-05	0.767	0.664	DC
PSMB8	0.291578	3.14968e-09	5.9907e-05	0.884	0.78	DC
GNAI2	0.255526	3.23652e-09	6.15585e-05	0.493	0.391	DC
IGLL1	0.430868	3.62203e-09	6.88909e-05	0.514	0.584	DC
HMGB2	0.347053	5.10158e-09	9.70321e-05	0.781	0.922	DC
MIS18BP1	0.254965	7.2517e-09	0.000137927	0.582	0.499	DC
VIM	0.322095	8.42986e-09	0.000160336	0.849	0.722	DC
LRRFIP1	0.271455	9.48004e-09	0.00018031	0.658	0.516	DC
APPL1	0.277862	1.19911e-08	0.000228071	0.473	0.28	DC
WAS	0.270807	1.83521e-08	0.000349058	0.486	0.307	DC
CENPF	0.252155	1.93508e-08	0.000368053	0.349	0.413	DC
OAS1	0.300749	3.22685e-08	0.000613748	0.342	0.205	DC
NUDT7	0.286095	3.32079e-08	0.000631615	0.438	0.273	DC
TOP2A	0.385972	4.27107e-08	0.000812358	0.37	0.313	DC
ATP6V1G1	0.251113	5.44025e-08	0.00103473	0.911	0.874	DC
UBC	0.29961	7.58893e-08	0.00144341	0.87	0.801	DC
CDKN3	0.258901	9.10753e-08	0.00173225	0.336	0.336	DC
CD37	0.276587	1.07268e-07	0.00204024	0.932	0.858	DC
APEX1	0.262356	1.64578e-07	0.00313027	0.945	0.902	DC
FCGRT	0.290928	1.69881e-07	0.00323114	0.61	0.491	DC
UBE2C	0.572795	2.07996e-07	0.00395608	0.377	0.395	DC
FYB1	0.252786	3.20156e-07	0.00608936	0.329	0.2	DC
NKG7	3.29902	1.73124e-66	3.29282e-62	0.778	0.226	CLP
CMC1	2.21313	2.89572e-55	5.50765e-51	0.778	0.499	CLP
GNLY	3.6707	2.25653e-51	4.29192e-47	0.444	0.016	CLP
GIMAP7	2.18935	6.10365e-51	1.16091e-46	0.667	0.067	CLP
CD247	1.94937	1.23521e-43	2.34936e-39	0.556	0.016	CLP
CD7	1.89962	1.32152e-37	2.51352e-33	0.444	0.156	CLP
KLRF1	1.9177	1.75266e-37	3.33357e-33	0.444	0.022	CLP
IL2RG	1.75959	6.49177e-32	1.23474e-27	0.778	0.139	CLP
TRDC	1.91454	1.05556e-30	2.00768e-26	0.556	0.061	CLP
CD53	1.66299	7.21975e-28	1.3732e-23	0.889	0.485	CLP
APMAP	1.3562	1.74803e-27	3.32476e-23	0.444	0.313	CLP
RHOC	1.72739	8.44801e-26	1.60681e-21	0.444	0.15	CLP
CTSW	1.78581	1.16019e-25	2.20669e-21	0.778	0.665	CLP
FCER1G	2.23656	6.61989e-25	1.2591e-20	0.444	0.198	CLP
ISG20	1.59114	9.38581e-24	1.78518e-19	0.444	0.049	CLP
CALM1	1.35139	5.29565e-23	1.00723e-18	0.667	0.662	CLP
DOK2	1.66665	1.4867e-21	2.82771e-17	0.333	0.016	CLP
TRBC2	1.44456	5.68775e-21	1.08181e-16	0.556	0.136	CLP
PRF1	2.06974	7.15493e-21	1.36087e-16	0.444	0.003	CLP
GLIPR2	1.20782	3.67385e-20	6.98767e-16	0.444	0.232	CLP
KLRD1	2.01388	3.80558e-20	7.23821e-16	0.667	0.001	CLP
KLRB1	3.14309	4.1039e-20	7.80562e-16	0.667	0.002	CLP
GZMA	2.74162	1.14924e-19	2.18586e-15	0.667	0.001	CLP
SPON2	1.6354	1.58145e-19	3.00792e-15	0.222	0.034	CLP
CCL4	3.79852	1.8978e-19	3.60962e-15	0.556	0.004	CLP
EVL	1.23647	2.0926e-19	3.98012e-15	0.444	0.192	CLP
ID2	1.82719	2.21209e-19	4.20739e-15	0.667	0.16	CLP
PCSK7	1.12059	3.52151e-19	6.69792e-15	0.333	0.195	CLP
IKZF3	1.36328	4.21585e-19	8.01854e-15	0.222	0.008	CLP
CCL5	2.05364	5.17614e-19	9.84501e-15	0.444	0.012	CLP
CCL3	3.1719	6.11457e-19	1.16299e-14	0.556	0.038	CLP
UBC	1.56778	2.74069e-18	5.21279e-14	1	0.802	CLP
CLPTM1	0.989646	1.0706e-17	2.03627e-13	0.444	0.23	CLP
TYROBP	2.25708	1.20854e-17	2.29863e-13	0.556	0.211	CLP
PTPN4	0.986952	2.532e-17	4.81586e-13	0.333	0.077	CLP
MAD1L1	0.92746	3.28182e-17	6.24203e-13	0.333	0.169	CLP
CD69	1.6603	4.77237e-17	9.07705e-13	0.333	0.176	CLP
HMOX2	1.05174	5.7246e-17	1.08882e-12	0.556	0.249	CLP
HLA-A	1.81779	9.57054e-17	1.82032e-12	0.889	0.956	CLP
MYL12A	1.33509	9.81456e-17	1.86673e-12	1	0.892	CLP
B2M	1.41122	3.13985e-16	5.972e-12	1	1	CLP
MED29	0.927154	5.96201e-16	1.13397e-11	0.333	0.143	CLP
CIAO1	0.763727	6.45249e-16	1.22726e-11	0.222	0.265	CLP
BBS4	0.801452	8.27371e-16	1.57366e-11	0.222	0.062	CLP
RBCK1	1.128	1.46841e-15	2.79291e-11	0.556	0.383	CLP
STAT4	0.913022	1.49376e-15	2.84114e-11	0.222	0.025	CLP
GALNT11	0.878955	1.68516e-15	3.20517e-11	0.222	0.065	CLP
TDRD3	0.937532	2.04293e-15	3.88565e-11	0.222	0.09	CLP
SRPK2	0.859731	3.24084e-15	6.16408e-11	0.333	0.382	CLP
SIRT2	0.889011	5.08316e-15	9.66816e-11	0.333	0.186	CLP
PLPBP	0.857849	5.6444e-15	1.07357e-10	0.333	0.265	CLP
LCK	1.57833	5.85522e-15	1.11366e-10	0.444	0.002	CLP
CST7	1.97708	5.88752e-15	1.11981e-10	0.667	0.448	CLP
SYTL3	1.21971	6.37076e-15	1.21172e-10	0.222	0.007	CLP
STAU1	0.89588	6.81012e-15	1.29529e-10	0.444	0.322	CLP
CYTIP	1.07772	6.82467e-15	1.29805e-10	0.444	0.075	CLP
ECI2	0.956719	1.14021e-14	2.16867e-10	0.556	0.511	CLP
TOX	0.859498	1.27907e-14	2.4328e-10	0.222	0.059	CLP
GZMH	2.25101	1.29996e-14	2.47252e-10	0.444	0.002	CLP
GGA1	0.820753	2.04938e-14	3.89791e-10	0.222	0.203	CLP
WIPF1	0.985577	2.28676e-14	4.34941e-10	0.444	0.294	CLP
RARRES3	1.32632	2.30307e-14	4.38043e-10	0.556	0.262	CLP
TXNIP	1.64166	3.24521e-14	6.17239e-10	0.778	0.596	CLP
RAD9A	0.808588	3.58339e-14	6.8156e-10	0.222	0.143	CLP
CCNDBP1	0.979156	4.36242e-14	8.29732e-10	0.556	0.572	CLP
RASSF5	0.850454	6.88119e-14	1.3088e-09	0.222	0.068	CLP
MLC1	0.782975	7.05413e-14	1.34169e-09	0.222	0.281	CLP
OSER1	0.817907	8.87557e-14	1.68813e-09	0.333	0.255	CLP
MRPL49	0.685152	1.06605e-13	2.02763e-09	0.222	0.227	CLP
SH3BP2	0.884397	2.24141e-13	4.26315e-09	0.222	0.05	CLP
PDE4B	0.947045	2.52771e-13	4.80771e-09	0.111	0.013	CLP
RANBP3	0.789758	2.53325e-13	4.81825e-09	0.222	0.139	CLP
TMEM222	0.743055	3.17998e-13	6.04832e-09	0.222	0.16	CLP
C12orf43	0.688241	3.31778e-13	6.31042e-09	0.222	0.193	CLP
ZNF335	0.879663	3.36095e-13	6.39253e-09	0.222	0.034	CLP
CCND3	1.12852	3.65433e-13	6.95053e-09	0.444	0.167	CLP
ITGB2	1.32764	4.54484e-13	8.64428e-09	0.556	0.331	CLP
MATK	0.893876	4.68637e-13	8.91347e-09	0.333	0.245	CLP
CORO1A	1.86979	4.73079e-13	8.99796e-09	0.889	0.66	CLP
IFI44L	1.36859	4.81565e-13	9.15937e-09	0.556	0.38	CLP
ACTR3	1.01891	5.47085e-13	1.04056e-08	0.556	0.585	CLP
ADD3	0.955809	6.45758e-13	1.22823e-08	0.222	0.178	CLP
GYG1	0.819422	8.04657e-13	1.53046e-08	0.333	0.289	CLP
RER1	0.664468	8.99911e-13	1.71163e-08	0.222	0.44	CLP
AKAP13	1.07805	1.15729e-12	2.20117e-08	0.556	0.178	CLP
FLT3LG	0.883168	1.28205e-12	2.43846e-08	0.222	0.027	CLP
CHMP1B	0.884301	1.38154e-12	2.62768e-08	0.444	0.334	CLP
ABI3	1.01664	1.64373e-12	3.12637e-08	0.333	0.005	CLP
KATNBL1	0.799278	2.16267e-12	4.11341e-08	0.222	0.312	CLP
PLAA	0.737582	2.17559e-12	4.13797e-08	0.222	0.136	CLP
PIP4K2A	0.814546	2.2667e-12	4.31126e-08	0.222	0.244	CLP
UBIAD1	0.733872	2.31881e-12	4.41038e-08	0.222	0.129	CLP
ZCCHC9	0.647987	2.74217e-12	5.21561e-08	0.111	0.224	CLP
TMEM242	0.658089	2.94763e-12	5.60639e-08	0.222	0.278	CLP
YJU2	0.784436	3.02711e-12	5.75756e-08	0.333	0.232	CLP
ARID5B	1.02425	3.22132e-12	6.12694e-08	0.111	0.062	CLP
IL2RB	1.68775	3.22501e-12	6.13396e-08	0.444	0.001	CLP
EXOSC1	0.732	3.29178e-12	6.26096e-08	0.222	0.336	CLP
IFITM2	1.34162	3.31101e-12	6.29755e-08	0.556	0.776	CLP
DDX23	0.827029	3.34029e-12	6.35324e-08	0.333	0.204	CLP
TMSB4X	2.08906	3.35817e-12	6.38724e-08	1	0.982	CLP
PPP1CA	1.00376	3.81709e-12	7.2601e-08	0.778	0.814	CLP
SNRPN	0.665676	4.04432e-12	7.6923e-08	0.222	0.453	CLP
YWHAZ	0.887279	4.47865e-12	8.51839e-08	0.556	0.584	CLP
ACAA2	0.655768	4.64172e-12	8.82854e-08	0.222	0.558	CLP
UGP2	0.664314	4.75663e-12	9.04711e-08	0.222	0.455	CLP
XCL2	1.58359	5.62532e-12	1.06994e-07	0.444	0	CLP
PRKCH	0.851754	7.32506e-12	1.39323e-07	0.111	0.044	CLP
ORC4	0.617304	7.56304e-12	1.43849e-07	0.222	0.319	CLP
POLR3G	0.532541	7.80924e-12	1.48532e-07	0.111	0.083	CLP
CYSLTR1	1.05948	8.53107e-12	1.62261e-07	0.333	0.15	CLP
TBC1D2B	0.84234	8.79048e-12	1.67195e-07	0.222	0.067	CLP
NDFIP2	0.49507	9.21254e-12	1.75223e-07	0.111	0.034	CLP
SELENOF	0.952908	9.30972e-12	1.77071e-07	0.889	0.736	CLP
CD160	1.89357	9.6079e-12	1.82742e-07	0.444	0.001	CLP
XAF1	1.05973	1.03157e-11	1.96204e-07	0.667	0.388	CLP
PDLIM1	0.807416	1.03688e-11	1.97214e-07	0.333	0.59	CLP
SUCLG1	0.788203	1.04726e-11	1.9919e-07	0.444	0.59	CLP
EBLN3P	0.667085	1.07951e-11	2.05324e-07	0.111	0.204	CLP
INPP5D	0.842818	1.16038e-11	2.20703e-07	0.333	0.325	CLP
SELENOK	0.678044	1.18407e-11	2.2521e-07	0.222	0.551	CLP
GZMK	2.25878	1.20117e-11	2.28463e-07	0.444	0	CLP
HCST	1.65864	1.33597e-11	2.54101e-07	0.889	0.412	CLP
MAEA	0.707416	1.34401e-11	2.5563e-07	0.333	0.257	CLP
PSMB8-AS1	1.01795	1.47418e-11	2.80389e-07	0.556	0.383	CLP
WTAP	0.964093	1.8939e-11	3.6022e-07	0.444	0.329	CLP
VAMP2	0.984197	2.00329e-11	3.81025e-07	0.333	0.471	CLP
CLPP	0.505475	2.14821e-11	4.08589e-07	0.222	0.486	CLP
MGMT	0.715581	2.391e-11	4.54768e-07	0.333	0.504	CLP
C19orf24	0.717653	2.51412e-11	4.78186e-07	0.111	0.154	CLP
UCKL1	0.803633	2.68153e-11	5.10028e-07	0.333	0.155	CLP
JADE1	0.639669	2.88073e-11	5.47914e-07	0.222	0.239	CLP
STAMBP	0.80541	2.88266e-11	5.48281e-07	0.333	0.251	CLP
ARF1	0.668001	3.01258e-11	5.72994e-07	0.333	0.773	CLP
RRAGA	0.726065	3.40634e-11	6.47886e-07	0.222	0.084	CLP
ABCF1	0.614626	4.0934e-11	7.78565e-07	0.333	0.416	CLP
MALAT1	1.62553	4.20232e-11	7.99282e-07	1	0.999	CLP
DNAJB14	0.752421	4.51354e-11	8.58476e-07	0.222	0.161	CLP
GZMM	1.28327	4.94298e-11	9.40156e-07	0.222	0.002	CLP
GPANK1	0.680308	6.64134e-11	1.26318e-06	0.333	0.336	CLP
FLNA	0.764212	6.8082e-11	1.29492e-06	0.111	0.142	CLP
APBA2	0.670638	7.73795e-11	1.47176e-06	0.222	0.054	CLP
PLEKHO2	0.900066	8.16202e-11	1.55242e-06	0.222	0.03	CLP
DNAJB11	0.749953	8.65047e-11	1.64532e-06	0.333	0.281	CLP
GRPEL1	0.63029	9.66384e-11	1.83806e-06	0.333	0.338	CLP
SLC25A26	0.593275	1.048e-10	1.9933e-06	0.222	0.334	CLP
TINF2	0.763687	1.07532e-10	2.04526e-06	0.333	0.259	CLP
SPRY2	0.808883	1.17961e-10	2.24361e-06	0.111	0.043	CLP
TSR2	0.599228	1.18871e-10	2.26092e-06	0.222	0.273	CLP
DGCR6L	0.499357	1.19609e-10	2.27497e-06	0.222	0.399	CLP
ATP6V1E1	0.657479	1.20179e-10	2.28581e-06	0.333	0.439	CLP
PPID	0.49011	1.2197e-10	2.31987e-06	0.111	0.368	CLP
REEP5	0.686059	1.22507e-10	2.33008e-06	0.333	0.325	CLP
IL27RA	0.814593	1.25695e-10	2.39072e-06	0.333	0.143	CLP
YWHAH	0.729509	1.26789e-10	2.41153e-06	0.222	0.132	CLP
RHEB	0.616846	1.42511e-10	2.71057e-06	0.333	0.474	CLP
RASSF7	0.681948	1.44869e-10	2.75541e-06	0.222	0.15	CLP
WNK1	0.659442	1.46769e-10	2.79155e-06	0.222	0.215	CLP
ARID4B	0.658852	1.47529e-10	2.80599e-06	0.222	0.459	CLP
ANKRD11	0.82734	1.60922e-10	3.06075e-06	0.444	0.337	CLP
CCDC71	0.720117	1.86191e-10	3.54135e-06	0.333	0.182	CLP
ITGAM	0.494477	1.88445e-10	3.58422e-06	0.111	0.026	CLP
PTGDS	2.11204	1.90057e-10	3.61488e-06	0.222	0.002	CLP
TSEN54	0.803976	1.96798e-10	3.7431e-06	0.333	0.072	CLP
ZFAND6	0.687843	2.21173e-10	4.20671e-06	0.444	0.549	CLP
ATM	0.647694	2.222e-10	4.22625e-06	0.222	0.188	CLP
SUGT1	0.567946	2.28617e-10	4.3483e-06	0.333	0.51	CLP
PFN1	1.16119	2.36562e-10	4.49942e-06	1	0.892	CLP
TADA3	0.622921	2.39141e-10	4.54847e-06	0.333	0.443	CLP
IQGAP1	0.733528	2.47938e-10	4.71577e-06	0.222	0.149	CLP
ARID5A	0.701962	2.55983e-10	4.86879e-06	0.222	0.154	CLP
CSNK1D	0.66418	2.57401e-10	4.89576e-06	0.222	0.203	CLP
CARD16	0.756253	2.82634e-10	5.37569e-06	0.222	0.353	CLP
BPGM	0.660721	2.83719e-10	5.39633e-06	0.222	0.144	CLP
USB1	0.618469	2.9649e-10	5.63923e-06	0.222	0.194	CLP
SFSWAP	0.685228	3.05841e-10	5.8171e-06	0.222	0.234	CLP
CUTC	0.720534	3.11091e-10	5.91695e-06	0.444	0.414	CLP
PTGDR	1.07784	3.14068e-10	5.97358e-06	0.333	0	CLP
METTL18	0.800045	3.39378e-10	6.45496e-06	0.333	0.105	CLP
VPS26A	0.687443	3.52872e-10	6.71162e-06	0.333	0.273	CLP
TNFAIP8	0.784231	3.93187e-10	7.47842e-06	0.333	0.318	CLP
SLC4A1AP	0.643965	3.96565e-10	7.54266e-06	0.222	0.163	CLP
PCMT1	0.558338	3.99023e-10	7.58943e-06	0.333	0.553	CLP
MRPS6	0.58634	4.00607e-10	7.61955e-06	0.333	0.622	CLP
VAV1	0.727301	4.10699e-10	7.81149e-06	0.222	0.146	CLP
EIF5A2	0.482162	4.39284e-10	8.35518e-06	0.111	0.049	CLP
SOCS2	0.798845	4.39399e-10	8.35737e-06	0.333	0.204	CLP
G3BP2	0.621264	4.39855e-10	8.36604e-06	0.222	0.271	CLP
ARFIP2	0.74081	4.48529e-10	8.53103e-06	0.333	0.271	CLP
SLFN5	0.975837	4.51025e-10	8.57849e-06	0.222	0.02	CLP
CPNE3	0.761411	4.56427e-10	8.68124e-06	0.333	0.288	CLP
SHISA5	0.735554	4.80128e-10	9.13204e-06	0.444	0.405	CLP
RNF170	0.716659	5.03094e-10	9.56884e-06	0.222	0.141	CLP
C1GALT1	0.669051	6.35339e-10	1.20841e-05	0.222	0.131	CLP
EAPP	0.483587	6.44761e-10	1.22634e-05	0.222	0.504	CLP
TMEM101	0.536603	6.51177e-10	1.23854e-05	0.222	0.35	CLP
MON2	0.882347	6.76402e-10	1.28652e-05	0.333	0.053	CLP
CCDC115	0.756129	7.45262e-10	1.41749e-05	0.444	0.386	CLP
RNF157	0.503741	7.51723e-10	1.42978e-05	0.111	0.017	CLP
TM2D3	0.523641	7.59547e-10	1.44466e-05	0.222	0.351	CLP
IRF1	1.12258	7.72049e-10	1.46844e-05	0.444	0.273	CLP
M6PR	0.745955	8.07354e-10	1.53559e-05	0.444	0.508	CLP
PTPRC	0.948153	9.39997e-10	1.78787e-05	0.444	0.305	CLP
LEPROTL1	0.810712	9.73697e-10	1.85197e-05	0.444	0.376	CLP
DNTT	2.07958	9.92347e-10	1.88744e-05	0.333	0.005	CLP
HP1BP3	0.859047	9.97427e-10	1.89711e-05	0.556	0.413	CLP
ERAL1	0.494076	1.03719e-09	1.97273e-05	0.222	0.321	CLP
MEAF6	0.391251	1.07997e-09	2.05411e-05	0.222	0.603	CLP
IDI1	0.606253	1.11409e-09	2.119e-05	0.222	0.222	CLP
AC104986.2	0.835868	1.13571e-09	2.16012e-05	0.222	0.041	CLP
HAX1	0.490502	1.14571e-09	2.17913e-05	0.333	0.589	CLP
SERGEF	0.627386	1.32284e-09	2.51605e-05	0.222	0.177	CLP
CCDC28B	0.490851	1.3856e-09	2.63542e-05	0.222	0.424	CLP
RNPC3	0.754817	1.4133e-09	2.6881e-05	0.111	0.097	CLP
ATP6AP2	0.78242	1.44575e-09	2.74981e-05	0.556	0.462	CLP
UBE2V2	0.661071	1.44895e-09	2.75591e-05	0.444	0.578	CLP
IAH1	0.618945	1.57852e-09	3.00235e-05	0.333	0.424	CLP
CD48	1.33797	1.59955e-09	3.04234e-05	0.667	0.29	CLP
STXBP3	0.652969	1.62642e-09	3.09345e-05	0.222	0.227	CLP
RHBDF2	0.716317	1.65314e-09	3.14428e-05	0.222	0.02	CLP
ACD	0.461624	1.80516e-09	3.43342e-05	0.111	0.28	CLP
GIMAP4	1.02144	1.81956e-09	3.46081e-05	0.333	0	CLP
AC245297.3	0.860853	1.94297e-09	3.69553e-05	0.556	0.413	CLP
PI4K2A	0.405523	2.01368e-09	3.83002e-05	0.111	0.019	CLP
ELP3	0.649883	2.01708e-09	3.83649e-05	0.222	0.099	CLP
LRPAP1	0.731854	2.01765e-09	3.83757e-05	0.444	0.567	CLP
EML4	0.678896	2.02254e-09	3.84688e-05	0.222	0.119	CLP
CTSC	0.824398	2.15621e-09	4.10111e-05	0.333	0.626	CLP
ARL6IP5	0.935598	2.17294e-09	4.13293e-05	0.778	0.694	CLP
NDUFA5	0.52604	2.20612e-09	4.19603e-05	0.333	0.515	CLP
STK17B	0.800795	2.2177e-09	4.21806e-05	0.333	0.103	CLP
ARHGAP30	0.805941	2.2953e-09	4.36565e-05	0.333	0.171	CLP
ZNF32	0.712679	2.34979e-09	4.46929e-05	0.333	0.254	CLP
DDA1	0.564031	2.38605e-09	4.53827e-05	0.222	0.258	CLP
DDIT4	1.13288	2.39433e-09	4.55402e-05	0.333	0.077	CLP
LINC00861	1.07729	2.47476e-09	4.707e-05	0.333	0.001	CLP
NPRL2	0.667602	2.52074e-09	4.79444e-05	0.333	0.234	CLP
PAFAH1B1	0.630823	2.52144e-09	4.79578e-05	0.222	0.229	CLP
L3MBTL2	0.504047	2.5449e-09	4.84041e-05	0.111	0.108	CLP
INTS6L	0.550846	2.64169e-09	5.02449e-05	0.111	0.053	CLP
SPOP	0.634238	2.6574e-09	5.05438e-05	0.333	0.343	CLP
WASF2	0.851402	2.75926e-09	5.24811e-05	0.667	0.55	CLP
FUNDC1	0.617188	2.84012e-09	5.40191e-05	0.222	0.281	CLP
RAB27A	0.942613	3.05161e-09	5.80416e-05	0.444	0.181	CLP
MTFR1L	0.566655	3.29138e-09	6.26021e-05	0.222	0.259	CLP
ZNF544	0.803182	3.29505e-09	6.26718e-05	0.333	0.105	CLP
GALNT6	0.462807	3.33673e-09	6.34647e-05	0.111	0.113	CLP
[truncated: 850 more rows]

## Sheet: MDS3
Gene	avg_logFC	p_value	p_value_adjusted	pct_expression_CellType	pct_expression_Rest	CellType
[truncated: 9,541 more rows]

[truncated: 1 more sheets: MDS4]
